# Supplementary material
Source: PubMed Central journal article supplement (PMC6698182)
Supplement: NIHMS1044395-supplement-SI.pdf [file NIHMS1044395-supplement-SI.pdf]

# Supplementary Information

## **Long-Lived Charge Transfer States of Nickel(II) Aryl Halide Complexes Facilitate Bimolecular Photoinduced Electron Transfer**

Benjamin J. Shields, Bryan Kudisch, Gregory D. Scholes, and Abigail G. Doyle

correspondence to: [agdoyle@princeton.edu](mailto:agdoyle@princeton.edu)

## Table of Contents

|                                                         |       |
|---------------------------------------------------------|-------|
| I. Materials and Instrumentation .....                  | S-3   |
| II. Synthesis and Characterization of Ni Complexes..... | S-4   |
| III. Steady State Uv-Vis Absorption Experiments.....    | S-8   |
| IV. Computational Studies .....                         | S-12  |
| V. Ultrafast Transient Absorption Spectroscopy .....    | S-44  |
| VI. Global Analysis.....                                | S-68  |
| VII. Photolytic and Thermal Degradation Studies .....   | S-99  |
| VIII. Redox Bracketing Studies.....                     | S-104 |
| IX. Concentration Dependent Dynamics .....              | S-105 |
| X. C–O Coupling Experiments.....                        | S-118 |
| XI. LED Emission Spectrum.....                          | S-123 |
| XII. Electrochemical MLCT Assignment .....              | S-124 |
| XIII. References.....                                   | S-125 |
| XIV. NMR Spectra .....                                  | S-127 |
| XV. Tabulated Computational Data .....                  | S-134 |

## I. Materials and Instrumentation

Materials. All reagents were purchased from Sigma Aldrich, Oakwood, Acros, Alfa Aesar, Strem, or TCI, and stored in a N<sub>2</sub>-filled glovebox. THF was purchased inhibitor free, dried by passing through activated alumina columns and stored over activated molecular sieves in a N<sub>2</sub>-filled glovebox.

General Instrumentation. Proton nuclear magnetic resonance (<sup>1</sup>H NMR) spectra were recorded on a Bruker 500 AVANCE spectrometer (500 MHz). Carbon nuclear magnetic resonance (<sup>13</sup>C NMR) spectra were recorded on a Bruker 500 AVANCE spectrometer (126 MHz). High-resolution mass spectra were obtained on an Agilent 6220 LC/MS using electrospray ionization time-of-flight (ESI-TOF). Gas chromatography was performed on an Agilent 7890A series instrument equipped with a split-mode capillary injection system and flame ionization detectors. Fourier transform infrared (FT-IR) spectra were recorded on a Perkin-Elmer Spectrum 100 and are reported in terms of frequency of absorption (cm<sup>-1</sup>). Linear ultraviolet-visible absorption spectra were collected on an Agilent Cary 60 Spectrophotometer.

Light Sources. Experiments were carried out using 25W blue LED arrays (12-inch Sapphire Flex LED Strips 5050, High Density, 12V DC Power Leads, Waterproof, Black backing) purchased from Creative Lightings ( $\lambda_{\text{max}} = 467$  nm) or 34W blue LED lamps (Kessil H150 LED Grow Lights) purchased from Kessil ( $\lambda_{\text{max}} = 450$  nm flanked by a second peak at  $\lambda = 422$  nm). Blue LED arrays were assembled in 4×4 plastic blocks, holding 12×35mm ½ dram vials, with 2×3 side lighting strips and 1×2 bottom lighting strip.

X-Ray Crystallography. X-ray intensity data were measured on a Bruker PHOTON 100 CMOS system equipped with a Mo K $\alpha$  ImuS micro-focus source ( $\lambda = 0.71073$  Å). Frames were integrated with the Bruker SAINT software package. The structure was solved and refined using Bruker SHELXTL software package.

Transient Absorption Spectroscopy. A 1 kHz regeneratively amplified Ti:Sapphire laser (Coherent Libra, Santa Clara, California) with a commercial optical parametric amplifier (OPerA Solo, Vilnius, Lithuania) and commercial transient absorption spectrometer (Ultrafast Systems Helios, Sarasota, Florida) were used for pump-probe experiments. See section V for details.

## II. Synthesis and Characterization Ni Complexes

All Ni(II)(dtbbpy)(*o*-tolyl) halide complexes (dtbbpy = 4,4'-Di-*tert*-butyl-2,2'-bipyridyl) were prepared via oxidative addition of the corresponding *o*-tolyl halide to *in situ* prepared Ni(dtbbpy)(cod). Spectroscopically the halide series can be readily distinguished via <sup>1</sup>H NMR by shifts in the 6-pyridyl proton resonances (Figure S1). Note preparation of complex **1-I** required cooling to obviate the formation of paramagnetic impurities. It was found that Ni(dtbbpy)(cod) is soluble in pentane even at -30°C but Ni(II)(dtbbpy) aryl halide complexes are not. Therefore, a dynamic precipitation of product after the addition of *o*-tolyl iodide enabled the isolation of pure **1-I**.

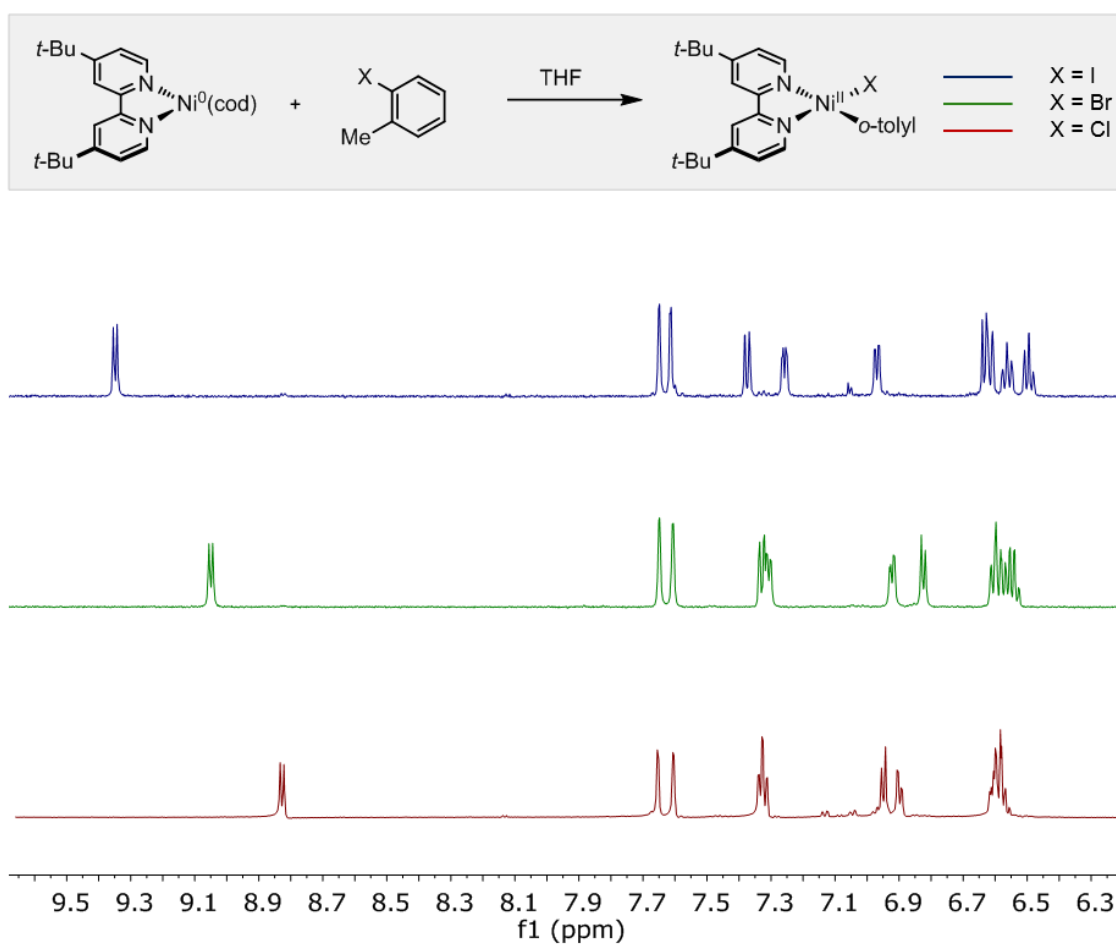

**Fig. S1.** Preparation of Ni(II)(dtbbpy)(*o*-tolyl) halide complexes. <sup>1</sup>H NMR shows diagnostic shifts in the 6-pyridyl proton resonances with halide substitution.



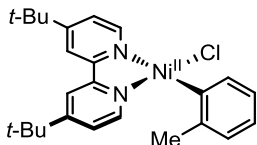

**Ni(dtbbpy)(*o*-tolyl)Cl (1-Cl).** In a nitrogen filled glove box a reaction tube equipped with a PTFE-coated stir bar was charged with Ni(cod)<sub>2</sub> (550 mg, 2.0 mmol), 4,4'-di-*tert*-butyl-2,2'-pyridine (537 mg, 2.0 mmol) and THF (5 mL). The resulting deep purple solution was left to stir for 1 hour at ambient temperature. To the reaction tube was added 2-chlorotoluene (12 mL, 103 mmol) and left to stir for 20 min. The resulting dark red solution was removed from the glove box and triturated with pentane. The precipitate was collected on a frit, rinsed with pentane and residual solvent was removed under high vacuum to give the title compound as a light red powder (700 mg, 1.54 mmol, 77% yield), with trace residual aryl chloride as an impurity. The title compound was used for spectroscopic studies without further purification. Diffraction quality crystals of **1-Cl** were grown by slow evaporation in THF.

**<sup>1</sup>H NMR (501 MHz, CD<sub>2</sub>Cl<sub>2</sub>):** δ 9.03 (d, *J* = 5.9 Hz, 1H), 7.85 (s, 1H), 7.80 (d, *J* = 1.6 Hz, 1H), 7.57 – 7.50 (m, 2H), 7.15 (d, *J* = 6.2 Hz, 1H), 7.10 (dd, *J* = 6.2, 1.9 Hz, 1H), 6.83–6.75 (m, 3H), 3.05 (s, 3H), 1.42 (s, 9H), 1.34 (s, 9H).

**<sup>13</sup>C NMR (126 MHz, CD<sub>2</sub>Cl<sub>2</sub>):** δ 164.08, 163.07, 156.43, 153.04, 151.49, 151.12, 149.46, 142.80, 135.89, 127.64, 124.10, 123.74, 123.39, 122.91, 117.99, 117.19, 35.89, 35.80, 30.58, 30.35, 25.33.

**HRMS:** (ESI-TOF) calculated for [(C<sub>25</sub>H<sub>31</sub>ClNi<sub>2</sub> – Cl + MeCN)<sup>+</sup>]: 458.2101, found: 458.2102.

**FTIR (ATR, cm<sup>-1</sup>):** 3042, 2961, 1614, 1546, 1480, 1409, 1365, 1251, 1202, 1120, 1041, 1071, 899, 847, 736.

**X-Ray Crystallography:** The crystal structure of **1-Cl** was 37% disordered. Figure S2 shows the refined structure with disorder modeled (left) and the major conformer (right). Note: *checkcif* gives multiple alerts associated with the disorder and constraints used in refinement (three C-type alerts and several G-type alerts). Without disorder modeling the structure does not pass *checkcif*. Both CIF files are included in separate SI documents.

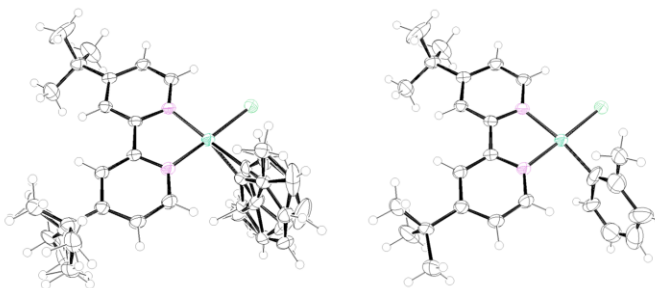

**Fig. S2.** X-Ray Crystal Structure of complex **1-Cl** with disorder modeled (left) and major conformer (right).

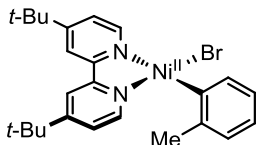

**Ni[(dtbbpy)(*o*-tolyl)Br (1-Br).** In a nitrogen filled glove box a vial equipped with a PTFE-coated stir bar was charged with Ni(cod)<sub>2</sub> (275 mg, 1.0 mmol), 4,4'-di-*tert*-butyl-2,2'-pyridine (268 mg, 1.0 mmol) and THF (3 mL). The resulting deep purple solution was left to stir for 2 hours at ambient temperature. 2-Bromotoluene (0.5 mL, 4.15 mmol) was added and the reaction vial was left to stir for 20 min. The resulting dark red solution was triturated with pentane (10 mL). The precipitate was collected on a frit, rinsed with pentane and residual solvent was removed under vacuum to give the title compound as a light red powder (280 mg, 0.56 mmol, 56% yield). The title compound was used for spectroscopic studies without further purification.

**<sup>1</sup>H NMR (501 MHz, CD<sub>2</sub>Cl<sub>2</sub>):** δ 9.24 (d, *J* = 5.9 Hz, 1H), 7.84 (s, 1H), 7.79 (s, 1H), 7.52 (dd, *J* = 7.3, 1.3 Hz, 1H), 7.49 (dd, *J* = 5.9, 1.7 Hz, 1H), 7.11 (dd, *J* = 6.2, 1.9 Hz, 1H), 7.01 (d, *J* = 6.2 Hz, 1H), 6.82–6.70 (m, 3H), 3.01 (s, 3H), 1.40 (s, 9H), 1.32 (s, 9H).

**<sup>13</sup>C NMR (126 MHz, CD<sub>2</sub>Cl<sub>2</sub>):** δ 163.98, 163.15, 156.39, 153.30, 151.11, 150.96, 149.90, 143.04, 136.59, 127.77, 124.17, 123.93, 123.50, 122.83, 118.03, 117.36, 35.90, 35.86, 30.59, 30.37, 25.88.

**HRMS:** (ESI-TOF) calculated for ([C<sub>25</sub>H<sub>31</sub>BrN<sub>2</sub>Ni – Br + MeCN]<sup>+</sup>): 458.2101, found: 458.2100.

**FTIR (ATR, cm<sup>-1</sup>):** 3042, 2961, 1615, 1568, 1543, 1480, 1456, 1409, 1364, 1303, 1252, 1202, 1158, 1121, 1040, 1016, 900, 885, 862, 839, 722.

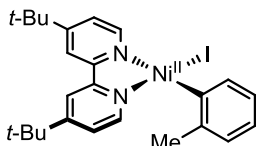

**Ni[(dtbbpy)(*o*-tolyl)I (1-I).** In a nitrogen filled glove box a Schlenk tube equipped with a PTFE-coated stir bar was charged with Ni(cod)<sub>2</sub> (250 mg, 0.909 mmol), 4,4'-di-*tert*-butyl-2,2'-pyridine (244 mg, 0.909 mmol) and THF (7 mL) and left to stir for 1 hour to give a deep purple solution. The tube was fitted with a 10 mm bore stopcock, sealed with a septum, removed from the glovebox, placed in a dry ice acetone bath, and set to stir. The inlet of the Schlenk tube was connected to a manifold, a needle from the manifold was plunged through the septa, and following three vacuum purge cycles the stopcock and Schlenk inlet were opened and left under positive nitrogen pressure. Next 2-iodotoluene (238 mg, 0.139 mL, 1.091 mmol) was added via syringe, the reaction mixture was allowed to warm to ~ 10°C, the stopcocks were closed, and the reaction mixture was brought into the glovebox. The reaction mixture was still purple, indicating the presence of Ni(dtbbpy)(cod). The reaction mixture was diluted into pentanes (50 mL) and the solution was allowed to stir for 1 hour. The resulting red precipitate was collected on a frit, rinsed with pentane, and residual solvent was removed under vacuum to give the title compound as a red/brown powder (109 mg, 0.20 mmol, 22% yield). The title compound was used for spectroscopic studies without further purification.

**<sup>1</sup>H NMR (501 MHz, CD<sub>2</sub>Cl<sub>2</sub>):** δ 9.54 (d, *J* = 5.9 Hz, 1H), 7.84 (d, *J* = 1.4 Hz, 1H), 7.80 (d, *J* = 1.6 Hz, 1H), 7.56 (d, *J* = 7.3 Hz, 1H), 7.45 (dd, *J* = 5.9, 1.8 Hz, 1H), 7.16 (dd, *J* =

6.2, 2.0 Hz, 1H), 6.84 – 6.78 (m, 2H), 6.75 (t,  $J = 7.1$  Hz, 1H), 6.68 (t,  $J = 7.1$  Hz, 1H), 2.95 (s, 3H), 1.39 (s, 9H), 1.33 (s, 9H).

**$^{13}\text{C}$  NMR (126 MHz,  $\text{CD}_2\text{Cl}_2$ ):**  $\delta$  163.72, 163.19, 156.23, 154.21, 153.56, 149.86, 148.22, 143.54, 138.15, 127.85, 124.15 (2C), 123.61, 122.64, 118.01, 117.60, 35.87, 34.68, 30.55, 30.38, 27.06.

**HRMS:** (ESI-TOF) calculated for  $([\text{C}_{25}\text{H}_{31}\text{IN}_2\text{Ni} - \text{I} + \text{MeCN}]^+)$ : 458.2101, found: 458.2101.

**FTIR (ATR,  $\text{cm}^{-1}$ ):** 3042, 2960, 1611, 1548, 1480, 1407, 1366, 1291, 1249, 1202, 1157, 1123, 1016, 930, 895, 850, 840, 736.

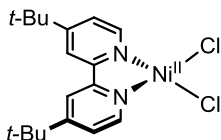

**Ni(dtbbpy)Cl<sub>2</sub> (2).** A stock solution of the title compound was prepared for spectroscopic studies in the glove box without isolation. To a 10mL volumetric flask NiCl<sub>2</sub>(DME) (1.1 mg, 0.005 mmol) and 4,4'-di-*tert*-butyl-2,2'-pyridine (1.3 mg, 0.005 mmol) were added, the flask was filled to the line with THF, a stir bar was added, and the resulting light blue/green solution was left to stir for 2 h. A shift in the absorption of dtbbpy from 280 nm to 300 nm indicated formation of the complex (Figure S3). A similar shift was observed in Ni(dtbbpy)(*o*-tolyl) halide complexes.

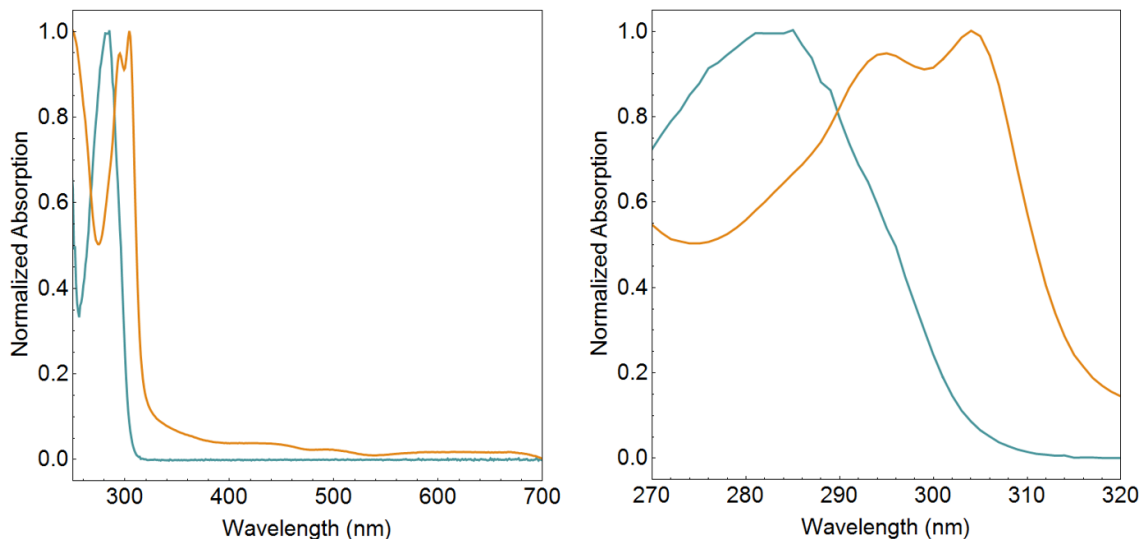

**Fig. S3.** Preparation of Ni(dtbbpy)Cl<sub>2</sub>. Uv-vis spectra of free dtbbpy (teal) and 1:1 mixture of NiCl<sub>2</sub>(DME) and dtbbpy (yellow).

### III. Steady-State Uv-Vis Absorption Spectroscopy

Linear Absorption Data. Linear absorption spectra were collected on an Agilent Cary 60 Spectrophotometer. All reagents were dispensed in stock solutions prepared volumetrically inside a nitrogen filled glove box. In a typical experiment, THF and analyte dispensed in THF were added to screw-top cuvette. The cuvette was then sealed with a septum cap, removed from the glovebox, and a spectrum was collected.

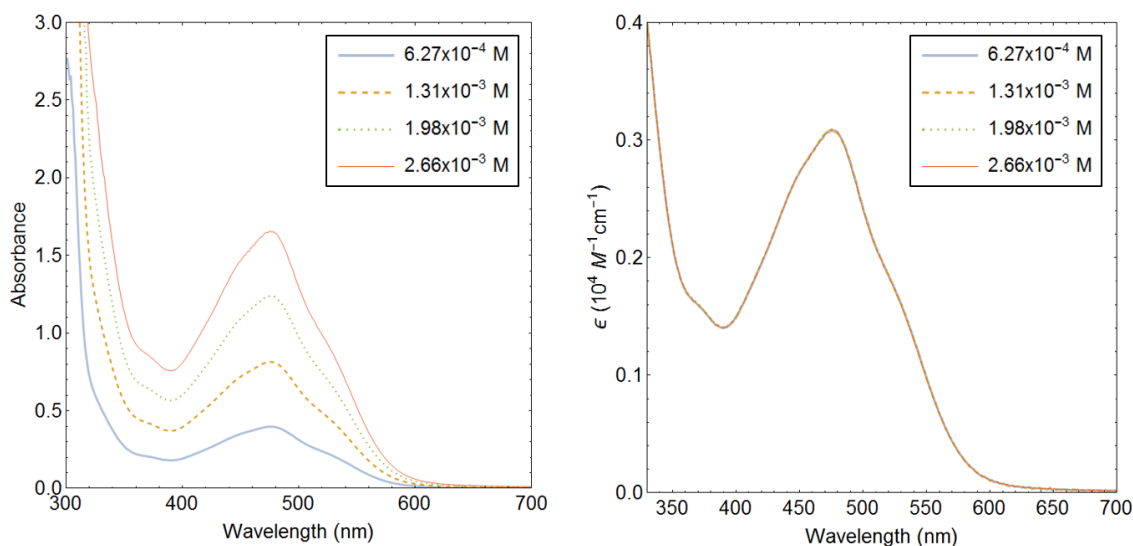

**Fig. S4.** Comparison of absorption and extinction spectra of Ni(dtbbpy)(*o*-tolyl)Cl (**1-Cl**, 2 mm pathlength optical glass cuvette) in THF at different concentrations. The extinction spectra at different concentrations overlay giving no evidence for ground state aggregation.

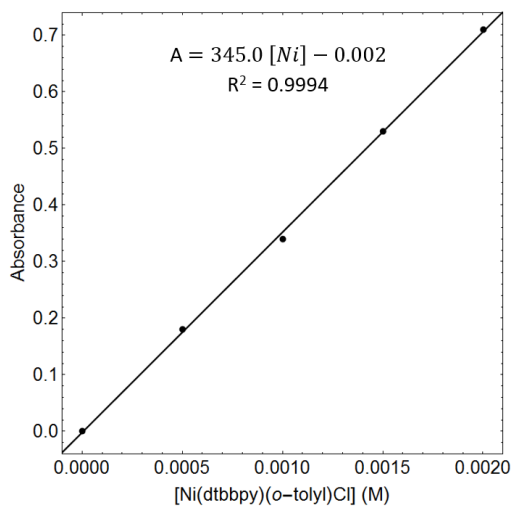

**Fig. S5.** Single wavelength (412 nm) calibration curve for Ni(dtbbpy)(*o*-tolyl)Cl (**1-Cl**, 2 mm pathlength optical glass cuvette) in THF.

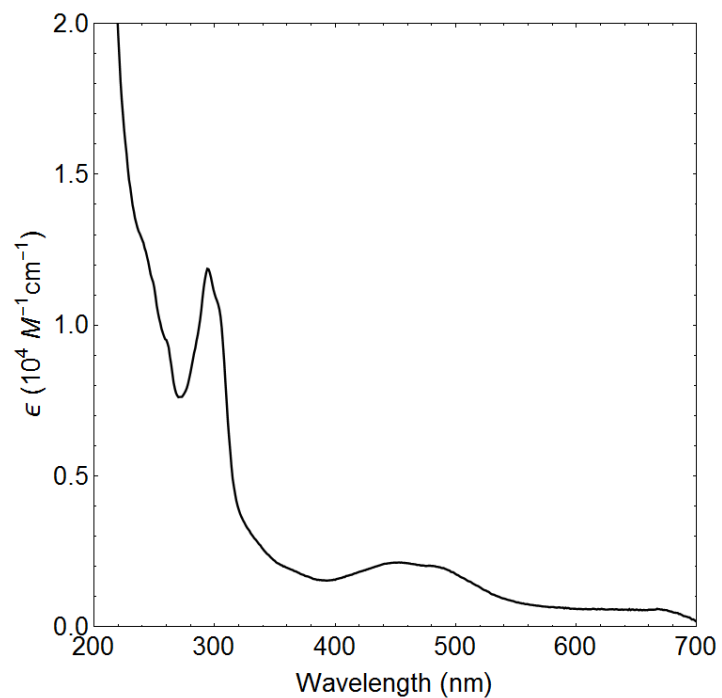

**Fig. S6.** Extinction spectrum of Ni(dtbbpy)(*o*-tolyl)Cl (**1-Cl**,  $3.88 \times 10^{-4}$  M, 1 mm pathlength quartz cuvette) in THF.

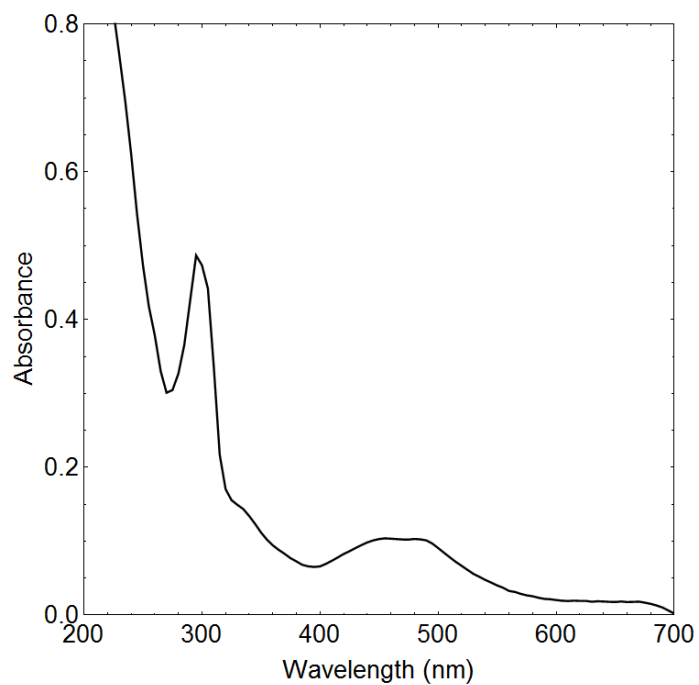

**Fig. S7.** Absorption spectrum of Ni(dtbbpy)(*o*-tolyl)Br (**1-Br**, 1 mm pathlength quartz cuvette) in THF.

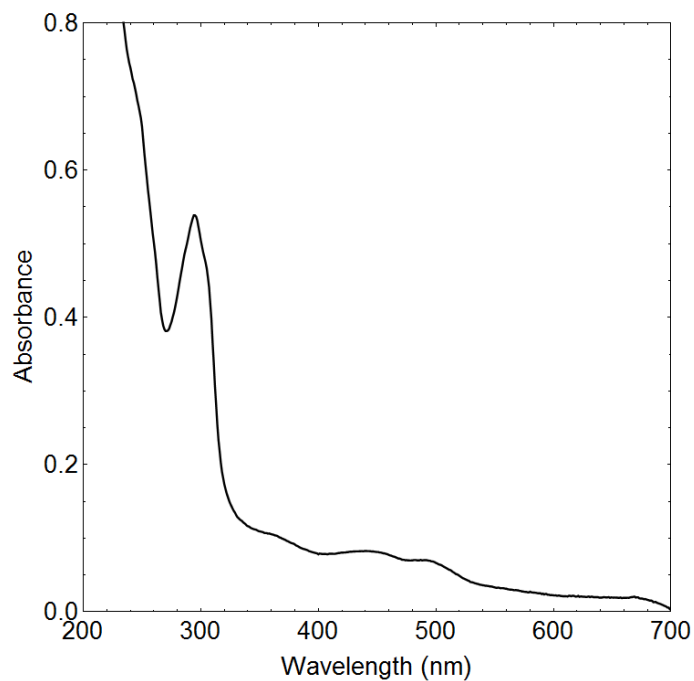

**Fig. S8.** Absorption spectrum of Ni(dtbbpy)(*o*-tolyl)I (**1-I**, 1 mm pathlength quartz cuvette) in THF.

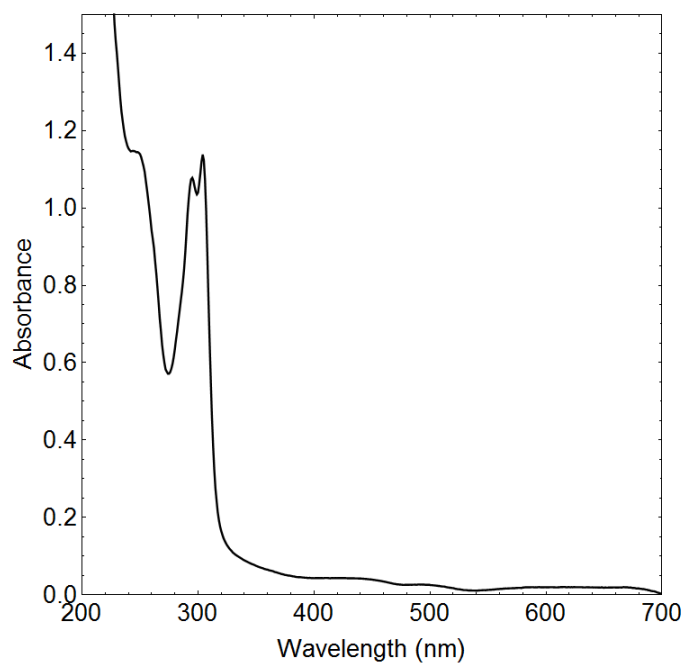

**Fig. S9.** Absorption spectrum of Ni(dtbbpy)Cl<sub>2</sub> (**2**, 1 mm pathlength quartz cuvette) in THF.

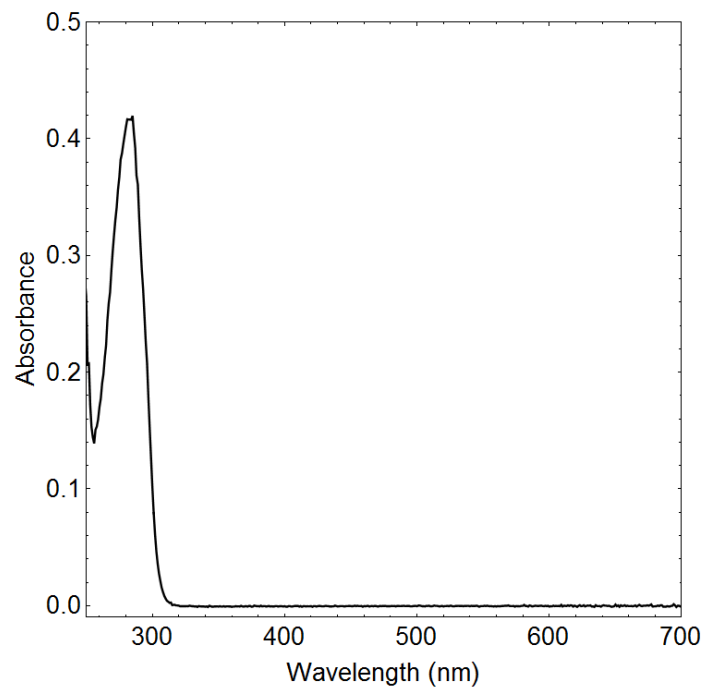

**Fig. S10.** Absorption spectrum of 4,4'-di-*tert*-butyl-2,2'-bipyridine (1 mm pathlength quartz cuvette) in THF.

## IV. Computational Studies

General Methods. Calculations were performed on Gaussian 09 D.01 and Gaussian 16 A.03 software suites.<sup>35,36</sup> For all calculations Becke's three-parameter hybrid exchange-correlation functional (B3LYP) was used based on benchmarking studies (Figure S11 and S12). Several studies suggest that the hybrid B3LYP functional is excellent for the treatment of LC and MLCT states and the computation of  $S_0$ - $S_N$  and  $T_1$ - $T_N$  excitation energies and oscillator strengths.<sup>37,38</sup> Optimization and frequency calculations were carried out using TZVP (H, C, N, Cl, Br, Ni) and SDD (I) basis sets. All frequency calculations carried out on stationary points gave no imaginary frequencies. Linear response time-dependent DFT (TD-DFT) calculations were carried out on the gas-phase optimized geometry using TZVP (H, C, N, Cl, Br, Ni) and SDD (I) basis sets. The  $S_0$ - $T_1$  gap of complex **1**-Cl was calculated using the sum of electronic and thermal free energies from frequency calculations carried out on the geometry optimized singlet and triplet structures. Triplet-triplet ( $T_1$ - $T_N$ ) excitation energies and oscillator strengths, for the simulation of the transient absorption spectrum of  ${}^3\text{MLCT}_1$  **1**-Cl, were calculated from the geometry optimized  $T_1$  state of **1**-Cl. Transition assignments were made based on orbital contributions and changes in atomic charge calculated by Natural Population Analysis (NPA). Transitions were described by a linear combination of ground state orbitals, resulting from the perturbative response treatment with the B3LYP hybrid exchange-correlation functional. Accordingly, transitions were evaluated using relative Kohn-Sham orbital contributions (tabulated in section XV) and natural population analysis (NPA) to aid the assignment of CT transitions.



**Benchmarking Studies.** Functional/basis set combinations were evaluated against the absorption spectrum of Ni(dtbbpy)(*o*-tolyl)Cl (**1-Cl**). Becke's three-parameter hybrid exchange-correlation functional (B3LYP) with TZVP basis set best reproduced the experimental absorption spectra.

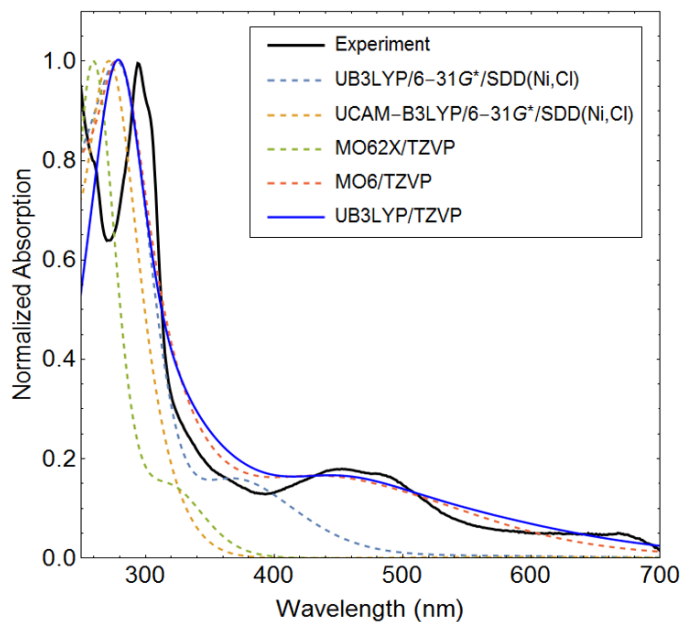

**Fig. S11.** TD-DFT benchmarking studies for [Ni(dtbbpy)(*o*-tolyl)Cl] (**1-Cl**) various levels of theory.

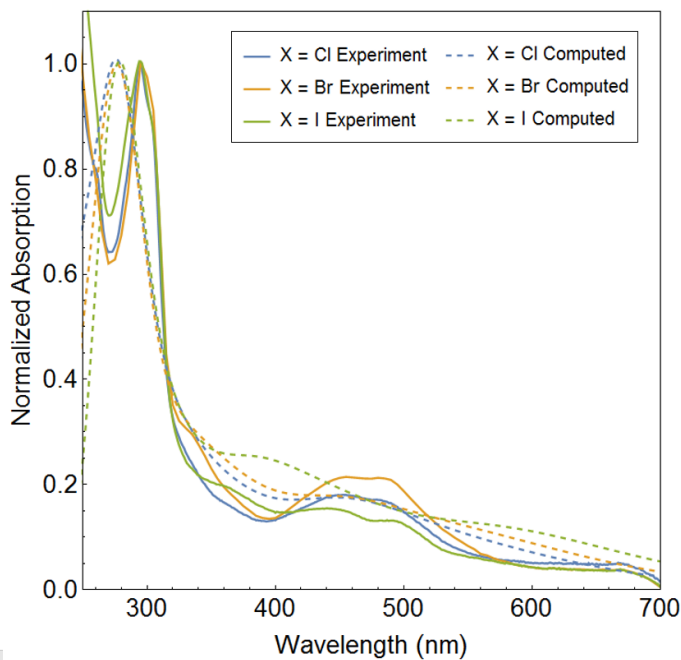

**Fig. S12.** TD-DFT benchmarking studies for [Ni(dtbbpy)(*o*-tolyl)X] **1** (X = Cl, Br, I).

Kohn-Sham Orbital Diagrams. For complexes with singlet ground states UB3LYP calculations produced identical  $\alpha$  and  $\beta$  Kohn-Sham orbitals. Accordingly, for singlets only the computed  $\alpha$  orbitals are shown.

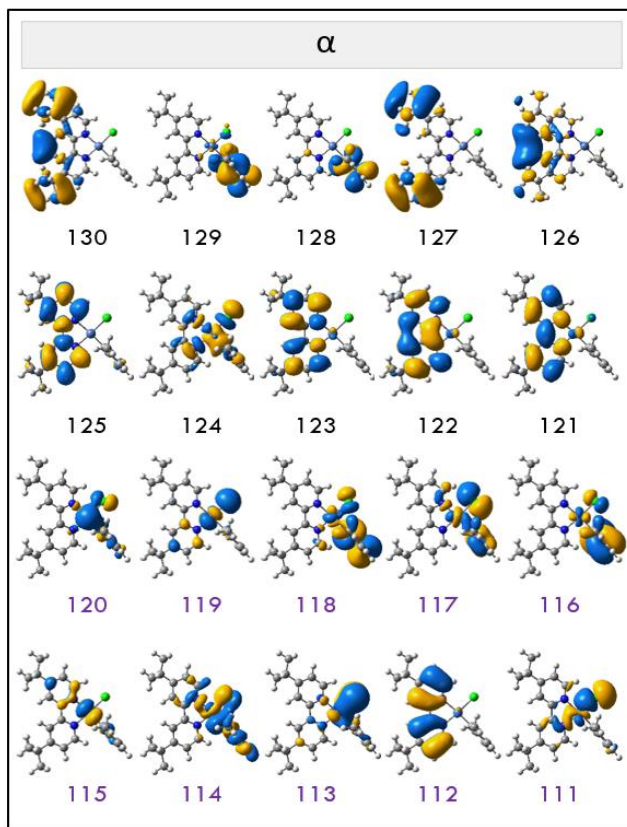

**Fig. S13.** Frontier molecular orbitals for [Ni(dtbbpy)(*o*-tolyl)Cl] (**1-Cl**) S<sub>0</sub> optimized geometry.

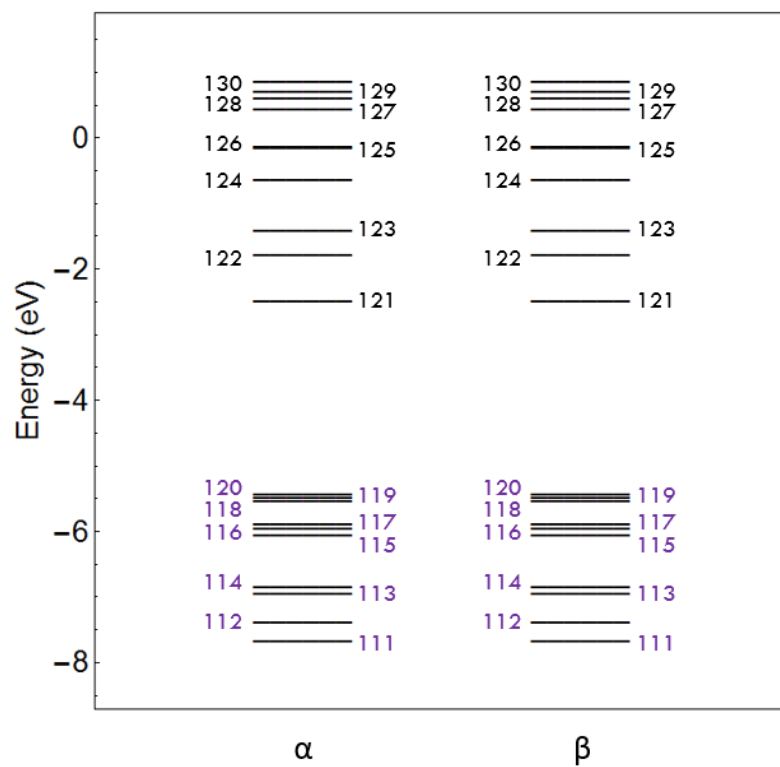

**Fig. S14.** Energy levels for frontier molecular orbitals of [Ni(dtbbpy)(*o*-tolyl)Cl] (**1-Cl**)  $S_0$  optimized geometry.

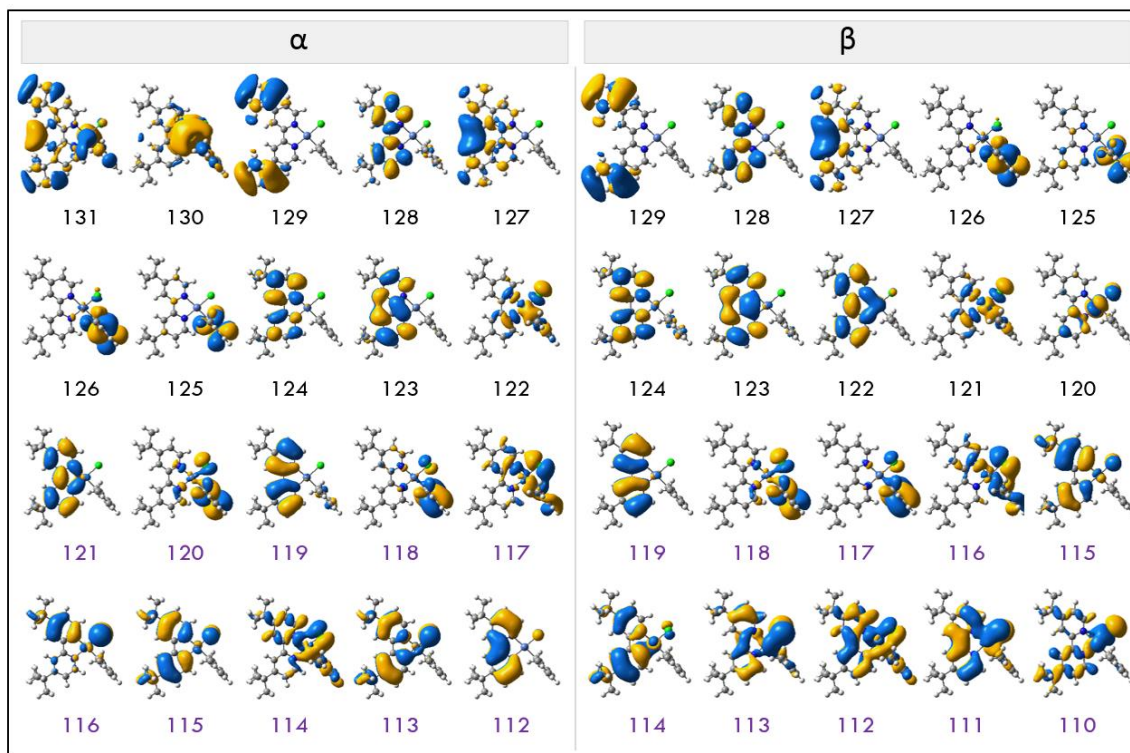

**Fig. S15.** Frontier molecular orbitals for [Ni(dtbbpy)(*o*-tolyl)Cl] (**1-Cl**)  $T_1$  optimized geometry.

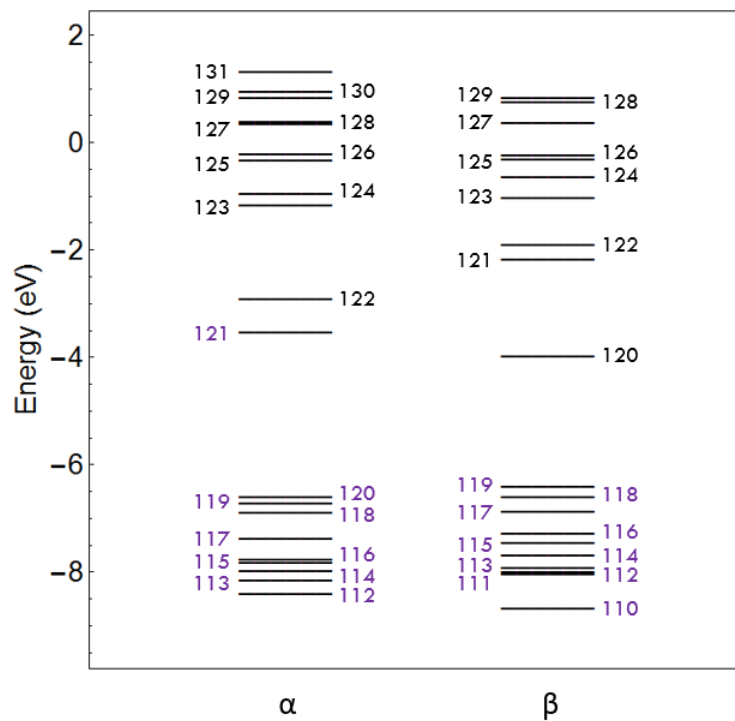

**Fig. S16.** Energy levels for frontier molecular orbitals of [Ni(dtbbpy)(*o*-tolyl)Cl] (**1-Cl**)  $T_1$  optimized geometry.

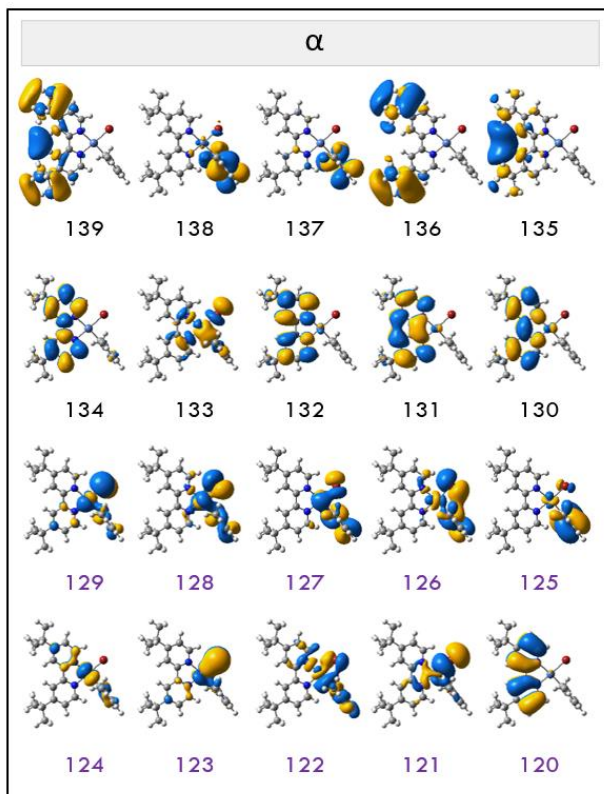

**Fig. S17.** Frontier molecular orbitals for [Ni(dtbbpy)(*o*-tolyl)Br] (**1-Br**)  $S_0$  optimized geometry.

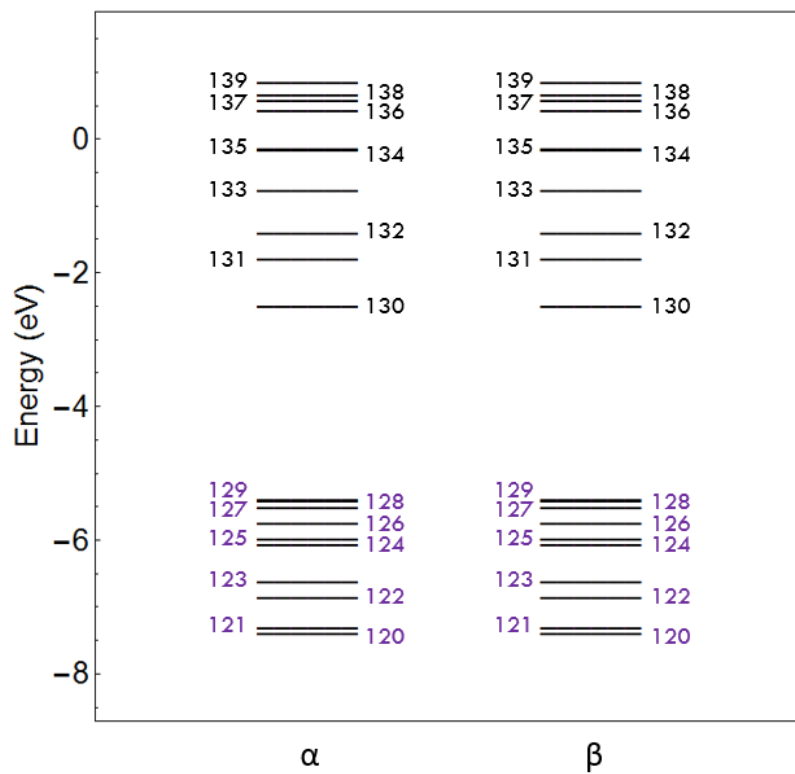

**Fig. S18.** Energy levels for frontier molecular orbitals of [Ni(dtbbpy)(*o*-tolyl)Br] (**1-Br**) S<sub>0</sub> optimized geometry.

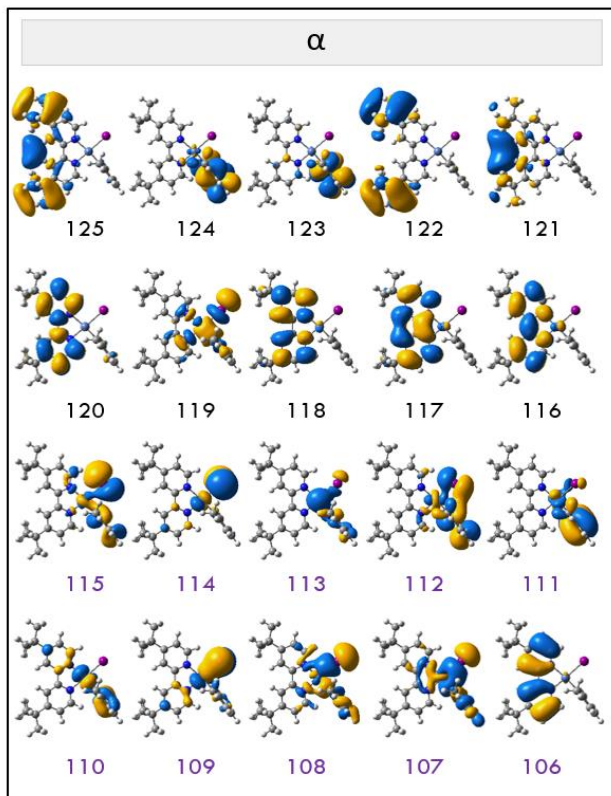

**Fig. S19.** Frontier molecular orbitals for  $[\text{Ni}(\text{dtbbpy})(o\text{-tolyl})\text{I}] \text{S}_0$  (**1-I**) optimized geometry.



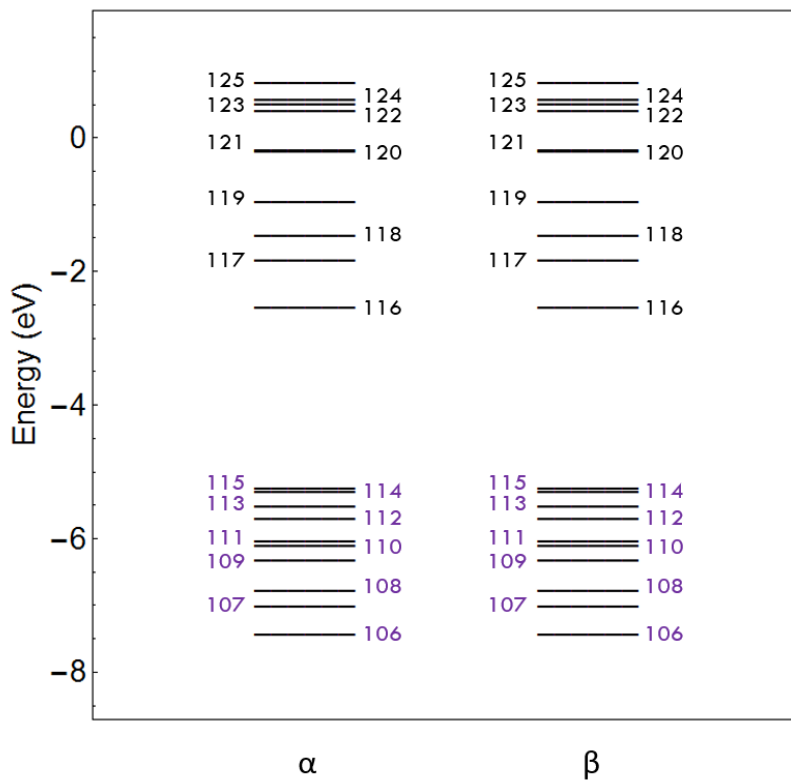

**Fig. S20.** Energy levels for frontier molecular orbitals of [Ni(dtbbpy)(*o*-tolyl)I] (**1-I**)  $S_0$  optimized geometry.

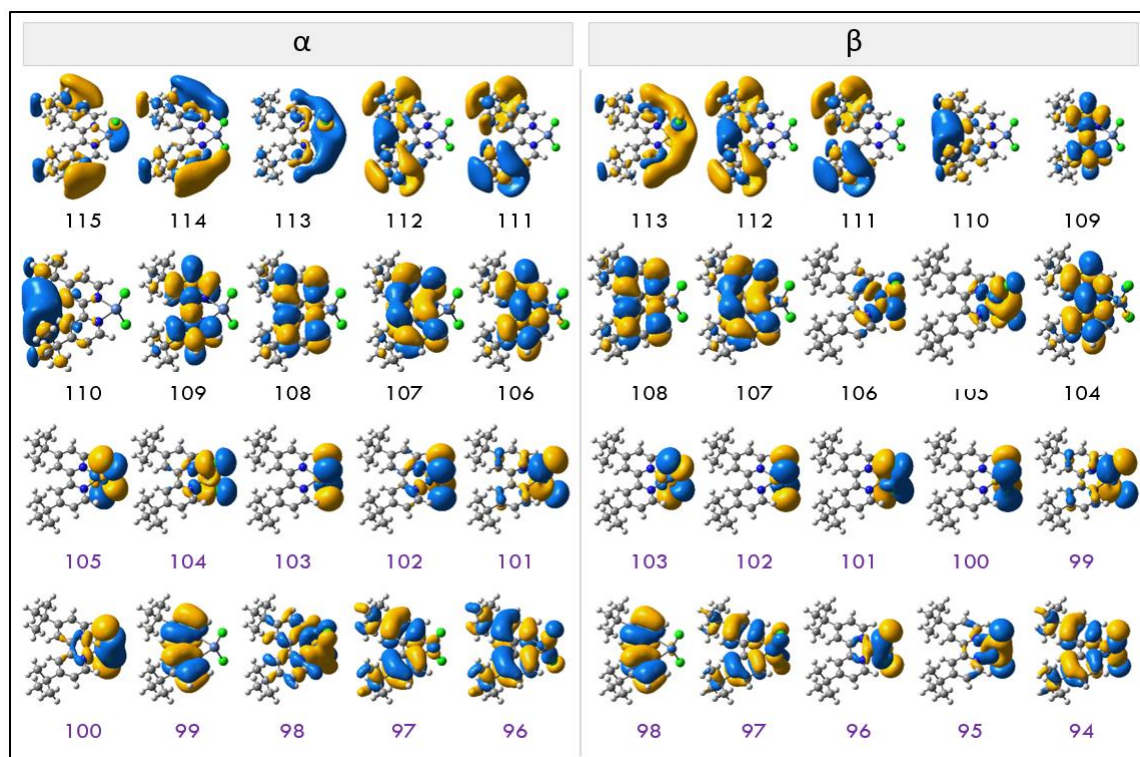

**Fig. S21.** Frontier molecular orbitals for [Ni(dtbbpy)Cl<sub>2</sub>] (**2**) T<sub>0</sub> optimized geometry.

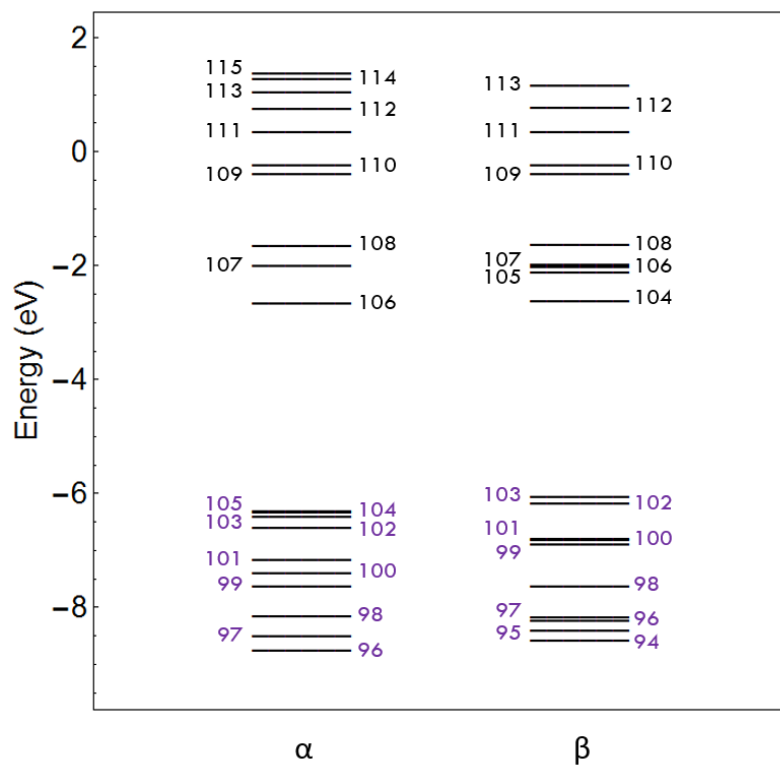

**Fig. S22.** Energy levels for frontier molecular orbitals of [Ni(dtbbpy)Cl<sub>2</sub>] (**2**) T<sub>0</sub> optimized geometry.

Linear Response Time-Dependent Density Functional Theory.

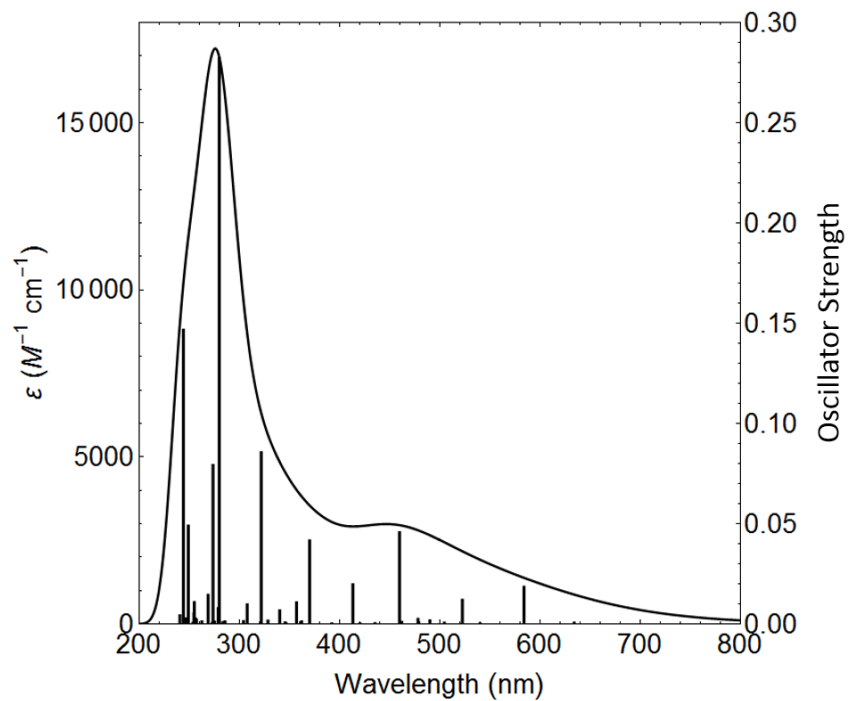

**Fig. S23.** Calculated absorption spectrum (solid black line) and TD-DFT calculated oscillators (solid bars: first 100 excited states) of [Ni(dtbbpy)(*o*-tolyl)Cl] (**1-Cl**)  $S_0$ .

**Table S1.** TD-DFT calculated transitions 1-50 for [Ni(dtbbpy)(*o*-tolyl)Cl](1-Cl) S<sub>0</sub>.

| Excited State | $\lambda$ (nm) | f      | $\langle S^{*2} \rangle$ | Excited State | $\lambda$ (nm) | f      | $\langle S^{*2} \rangle$ |
|---------------|----------------|--------|--------------------------|---------------|----------------|--------|--------------------------|
| 1             | 1354.17        | 0      | 2                        | 26            | 397.17         | 0      | 2                        |
| 2             | 1091.22        | 0      | 2                        | 27            | 394.25         | 0      | 2                        |
| 3             | 900.98         | 0      | 2                        | 28            | 392.22         | 0.0001 | 0                        |
| 4             | 663.48         | 0      | 2                        | 29            | 391.99         | 0      | 2                        |
| 5             | 661.18         | 0      | 2                        | 30            | 389.57         | 0      | 0                        |
| 6             | 655.94         | 0      | 2                        | 31            | 378.44         | 0      | 2                        |
| 7             | 634.12         | 0.0004 | 0                        | 32            | 370.06         | 0.0414 | 0                        |
| 8             | 583.99         | 0.0183 | 0                        | 33            | 367.45         | 0      | 2                        |
| 9             | 540.2          | 0.0001 | 0                        | 34            | 363.64         | 0      | 2                        |
| 10            | 522.38         | 0.0118 | 0                        | 35            | 362.11         | 0.001  | 0                        |
| 11            | 520.92         | 0      | 2                        | 36            | 356.94         | 0.0106 | 0                        |
| 12            | 509.6          | 0      | 2                        | 37            | 353.45         | 0      | 2                        |
| 13            | 504.5          | 0.0004 | 0                        | 38            | 346.71         | 0      | 2                        |
| 14            | 490.01         | 0.0015 | 0                        | 39            | 346.33         | 0.0002 | 0                        |
| 15            | 480.67         | 0      | 2                        | 40            | 345.58         | 0.0005 | 0                        |
| 16            | 478.24         | 0.0023 | 0                        | 41            | 344.57         | 0      | 2                        |
| 17            | 461.89         | 0.0008 | 0                        | 42            | 340.13         | 0.0066 | 0                        |
| 18            | 459.69         | 0.0456 | 0                        | 43            | 339.25         | 0      | 2                        |
| 19            | 445.94         | 0      | 2                        | 44            | 337.11         | 0      | 2                        |
| 20            | 438.87         | 0      | 2                        | 45            | 331.43         | 0      | 2                        |
| 21            | 435.36         | 0.0002 | 0                        | 46            | 329.97         | 0      | 2                        |
| 22            | 435.02         | 0      | 2                        | 47            | 328.97         | 0      | 0                        |
| 23            | 421.37         | 0      | 2                        | 48            | 328.48         | 0.0014 | 0                        |
| 24            | 420.31         | 0.0001 | 0                        | 49            | 321.63         | 0.0854 | 0                        |
| 25            | 413.2          | 0.0195 | 0                        | 50            | 309.46         | 0      | 2                        |

**Table S2.** TD-DFT calculated transitions 51-100 for [Ni(dtbbpy)(*o*-tolyl)Cl](1-Cl) S<sub>0</sub>.

| Excited State | $\lambda$ (nm) | f      | $\langle S^{*2} \rangle$ | Excited State | $\lambda$ (nm) | f      | $\langle S^{*2} \rangle$ |
|---------------|----------------|--------|--------------------------|---------------|----------------|--------|--------------------------|
| 51            | 307.73         | 0.0095 | 0                        | 76            | 266.9          | 0      | 2                        |
| 52            | 304.59         | 0      | 2                        | 77            | 265.83         | 0      | 2                        |
| 53            | 304.02         | 0.0012 | 0                        | 78            | 262.44         | 0.001  | 0                        |
| 54            | 303.26         | 0      | 2                        | 79            | 257.01         | 0.0019 | 0                        |
| 55            | 290.69         | 0      | 2                        | 80            | 256.79         | 0      | 2                        |
| 56            | 287.96         | 0      | 2                        | 81            | 255.94         | 0.0025 | 0                        |
| 57            | 286.25         | 0      | 2                        | 82            | 255.43         | 0      | 2                        |
| 58            | 285.52         | 0.001  | 0                        | 83            | 255.19         | 0      | 2                        |
| 59            | 283.28         | 0.0007 | 0                        | 84            | 254.97         | 0.0107 | 0                        |
| 60            | 282.49         | 0      | 2                        | 85            | 254.54         | 0.0051 | 0                        |
| 61            | 279.85         | 0.2821 | 0                        | 86            | 253.87         | 0      | 2                        |
| 62            | 279.58         | 0      | 2                        | 87            | 253.53         | 0      | 2                        |
| 63            | 279.02         | 0      | 2                        | 88            | 253.45         | 0.0003 | 0                        |
| 64            | 278.8          | 0.0077 | 0                        | 89            | 248.96         | 0.0488 | 0                        |
| 65            | 278.69         | 0      | 2                        | 90            | 246.06         | 0      | 2                        |
| 66            | 277.25         | 0      | 2                        | 91            | 245.96         | 0.0025 | 0                        |
| 67            | 276.67         | 0      | 2                        | 92            | 245.72         | 0      | 2                        |
| 68            | 275.15         | 0      | 2                        | 93            | 245.29         | 0      | 2                        |
| 69            | 275.14         | 0.0009 | 0                        | 94            | 244.83         | 0.0012 | 0                        |
| 70            | 273.57         | 0.0791 | 0                        | 95            | 244.79         | 0      | 2                        |
| 71            | 272.76         | 0.0003 | 0                        | 96            | 244.24         | 0      | 2                        |
| 72            | 269.89         | 0      | 2                        | 97            | 244.1          | 0.1465 | 0                        |
| 73            | 269.21         | 0      | 2                        | 98            | 242.4          | 0      | 0                        |
| 74            | 269            | 0      | 2                        | 99            | 241.25         | 0      | 2                        |
| 75            | 268.68         | 0.0143 | 0                        | 100           | 240.52         | 0.004  | 0                        |

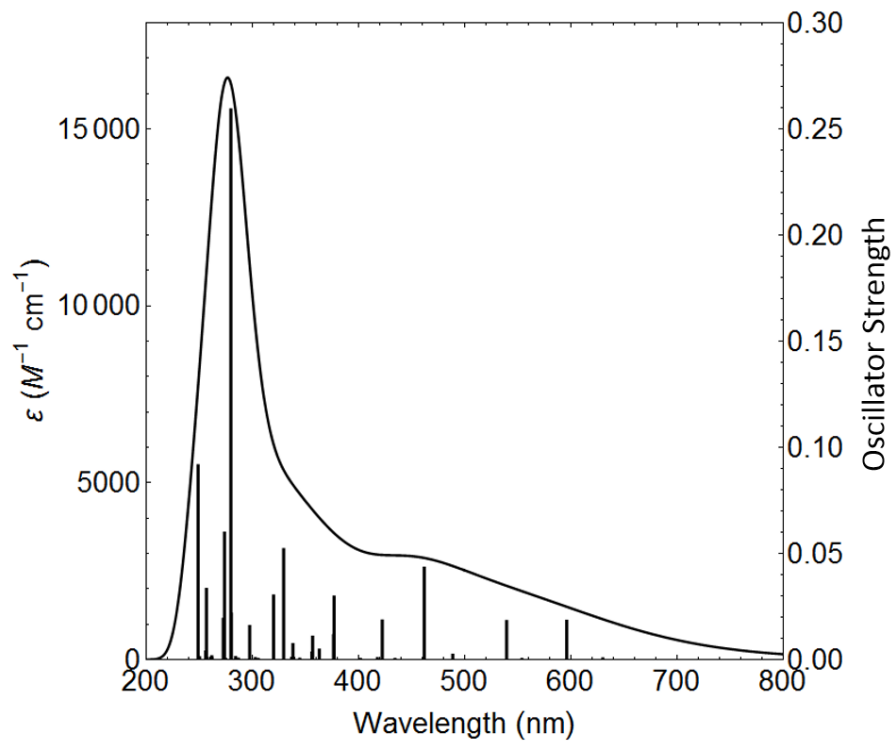

**Fig. S24.** Calculated absorption spectrum (solid black line) and TD-DFT calculated oscillators (solid bars: first 100 excited states) of [Ni(dtbbpy)(*o*-tolyl)Br](1-Br) S<sub>0</sub>.

**Table S3.** TD-DFT calculated transitions 1-50 for [Ni(dtbbpy)(*o*-tolyl)Br](**1-Br**) S<sub>0</sub>.

| Excited State | $\lambda$ (nm) | f      | $\langle S^{*2} \rangle$ | Excited State | $\lambda$ (nm) | f      | $\langle S^{*2} \rangle$ |
|---------------|----------------|--------|--------------------------|---------------|----------------|--------|--------------------------|
| 1             | 1422.16        | 0      | 2                        | 26            | 403.63         | 0      | 2                        |
| 2             | 1126.66        | 0      | 2                        | 27            | 402.58         | 0      | 2                        |
| 3             | 930.37         | 0      | 2                        | 28            | 401.75         | 0.0001 | 0                        |
| 4             | 674.71         | 0      | 2                        | 29            | 391.38         | 0      | 2                        |
| 5             | 662.87         | 0      | 2                        | 30            | 388.82         | 0      | 0                        |
| 6             | 656.03         | 0      | 2                        | 31            | 381.87         | 0      | 2                        |
| 7             | 630.1          | 0.0003 | 0                        | 32            | 378.79         | 0      | 2                        |
| 8             | 596.05         | 0.0181 | 0                        | 33            | 376.91         | 0.0294 | 0                        |
| 9             | 553.87         | 0.0001 | 0                        | 34            | 376.4          | 0.0113 | 0                        |
| 10            | 539.49         | 0.0179 | 0                        | 35            | 371.65         | 0      | 2                        |
| 11            | 530.83         | 0      | 2                        | 36            | 366.35         | 0      | 2                        |
| 12            | 525.29         | 0      | 0                        | 37            | 363.05         | 0.0044 | 0                        |
| 13            | 516.73         | 0      | 2                        | 38            | 357.72         | 0      | 2                        |
| 14            | 504.2          | 0      | 0                        | 39            | 356.68         | 0.0106 | 0                        |
| 15            | 500.25         | 0      | 2                        | 40            | 356.05         | 0.003  | 0                        |
| 16            | 488.63         | 0.002  | 0                        | 41            | 351.31         | 0      | 2                        |
| 17            | 480.44         | 0      | 0                        | 42            | 344.59         | 0.0002 | 0                        |
| 18            | 476.38         | 0      | 2                        | 43            | 343.71         | 0      | 2                        |
| 19            | 461.82         | 0.0431 | 0                        | 44            | 338.94         | 0      | 2                        |
| 20            | 444.41         | 0      | 2                        | 45            | 338.62         | 0      | 2                        |
| 21            | 437.63         | 0      | 2                        | 46            | 338.15         | 0.007  | 0                        |
| 22            | 434.34         | 0.0001 | 0                        | 47            | 336.96         | 0.0005 | 0                        |
| 23            | 422.27         | 0.0182 | 0                        | 48            | 331.88         | 0      | 2                        |
| 24            | 419.19         | 0      | 2                        | 49            | 329.39         | 0.0518 | 0                        |
| 25            | 417.63         | 0.0004 | 0                        | 50            | 320.87         | 0      | 2                        |



**Table S4.** TD-DFT calculated transitions 51-100 for [Ni(dtbbpy)(*o*-tolyl)Br] (**1-Br**) S<sub>0</sub>.

| Excited State | $\lambda$ (nm) | f      | $\langle S^{*2} \rangle$ | Excited State | $\lambda$ (nm) | f      | $\langle S^{*2} \rangle$ |
|---------------|----------------|--------|--------------------------|---------------|----------------|--------|--------------------------|
| 51            | 319.9          | 0.0299 | 0                        | 76            | 273.67         | 0.0596 | 0                        |
| 52            | 310.4          | 0      | 2                        | 77            | 272.54         | 0.0189 | 0                        |
| 53            | 305.52         | 0      | 2                        | 78            | 271.18         | 0      | 2                        |
| 54            | 305.48         | 0.0001 | 0                        | 79            | 271.02         | 0      | 2                        |
| 55            | 302.85         | 0      | 2                        | 80            | 266.12         | 0      | 2                        |
| 56            | 302.66         | 0.0004 | 0                        | 81            | 265.12         | 0      | 2                        |
| 57            | 300.05         | 0      | 2                        | 82            | 262.1          | 0.0006 | 0                        |
| 58            | 299.75         | 0      | 2                        | 83            | 261.66         | 0.0013 | 0                        |
| 59            | 297.4          | 0.0156 | 0                        | 84            | 260.45         | 0      | 2                        |
| 60            | 292.04         | 0      | 2                        | 85            | 257.74         | 0      | 2                        |
| 61            | 289.4          | 0      | 2                        | 86            | 257.46         | 0.0005 | 0                        |
| 62            | 288.18         | 0      | 2                        | 87            | 256.86         | 0      | 2                        |
| 63            | 286.8          | 0.0002 | 0                        | 88            | 256.73         | 0.033  | 0                        |
| 64            | 285.75         | 0.0001 | 0                        | 89            | 256.71         | 0      | 2                        |
| 65            | 285.59         | 0      | 2                        | 90            | 256.07         | 0.0036 | 0                        |
| 66            | 284.15         | 0.0009 | 0                        | 91            | 255.6          | 0      | 0                        |
| 67            | 281.77         | 0      | 2                        | 92            | 251.1          | 0      | 2                        |
| 68            | 281.37         | 0      | 2                        | 93            | 250.28         | 0.0008 | 0                        |
| 69            | 280.2          | 0.0214 | 0                        | 94            | 250.15         | 0      | 2                        |
| 70            | 279.68         | 0.2589 | 0                        | 95            | 249.71         | 0      | 2                        |
| 71            | 278.67         | 0      | 2                        | 96            | 249.6          | 0.0007 | 0                        |
| 72            | 275.99         | 0      | 2                        | 97            | 248.83         | 0.0913 | 0                        |
| 73            | 274.97         | 0      | 2                        | 98            | 246.66         | 0      | 2                        |
| 74            | 274.77         | 0.0001 | 0                        | 99            | 244.86         | 0      | 2                        |
| 75            | 274.14         | 0      | 2                        | 100           | 244.16         | 0      | 2                        |

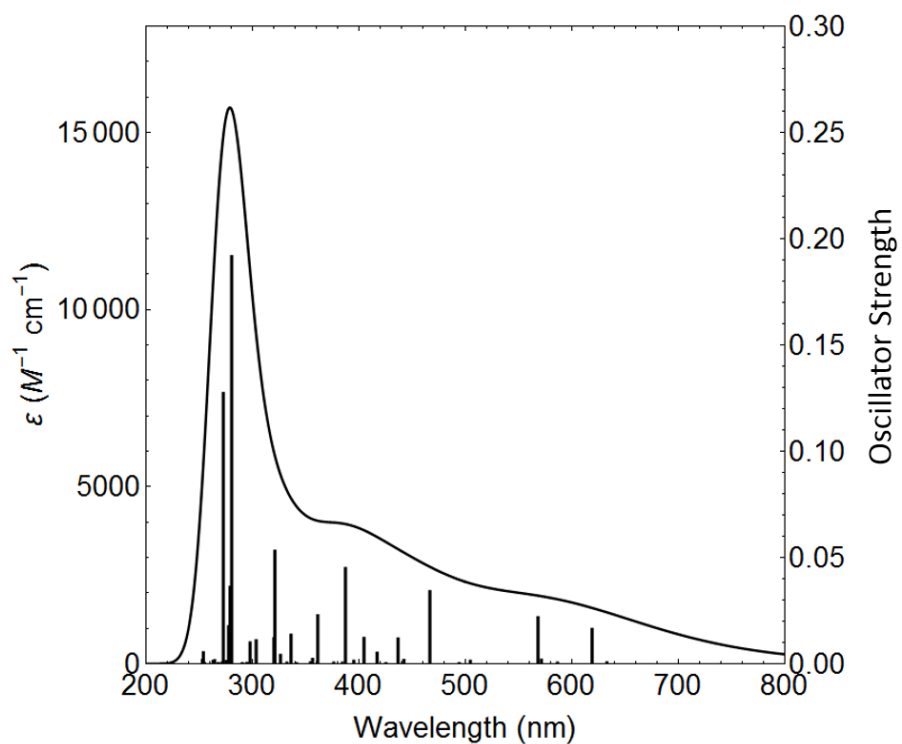

**Fig. S25.** Calculated absorption spectrum (solid black line) and TD-DFT calculated oscillators (solid bars: first 100 excited states) of [Ni(dtbbpy)(*o*-tolyl)I](1-I) S<sub>0</sub>.

**Table S5.** TD-DFT calculated transitions 1-50 for [Ni(dtbbpy)(*o*-tolyl)I](**1-I**) S<sub>0</sub>.

| Excited State | $\lambda$ (nm) | f      | $\langle S^{*2} \rangle$ | Excited State | $\lambda$ (nm) | f      | $\langle S^{*2} \rangle$ |
|---------------|----------------|--------|--------------------------|---------------|----------------|--------|--------------------------|
| 1             | 1585.52        | 0      | 2                        | 26            | 425.27         | 0.0001 | 0                        |
| 2             | 1209.41        | 0      | 2                        | 27            | 417.09         | 0.0049 | 0                        |
| 3             | 988.94         | 0      | 2                        | 28            | 414.74         | 0      | 2                        |
| 4             | 696.75         | 0      | 2                        | 29            | 404.74         | 0.0119 | 0                        |
| 5             | 675.94         | 0      | 2                        | 30            | 403.56         | 0      | 2                        |
| 6             | 657.18         | 0      | 2                        | 31            | 397.61         | 0      | 2                        |
| 7             | 632.82         | 0.0004 | 0                        | 32            | 395.17         | 0.0012 | 0                        |
| 8             | 619            | 0.0162 | 0                        | 33            | 387.28         | 0.0448 | 0                        |
| 9             | 588            | 0      | 2                        | 34            | 386.47         | 0      | 2                        |
| 10            | 586.45         | 0.0003 | 0                        | 35            | 384.43         | 0.0003 | 0                        |
| 11            | 571.36         | 0.0017 | 0                        | 36            | 383.36         | 0      | 2                        |
| 12            | 568.15         | 0.0217 | 0                        | 37            | 377.69         | 0      | 2                        |
| 13            | 541.25         | 0      | 2                        | 38            | 376.27         | 0.0003 | 0                        |
| 14            | 520.07         | 0      | 0                        | 39            | 366.62         | 0      | 2                        |
| 15            | 511.94         | 0      | 2                        | 40            | 361.44         | 0      | 2                        |
| 16            | 506            | 0      | 2                        | 41            | 361.28         | 0.0226 | 0                        |
| 17            | 504.55         | 0.0012 | 0                        | 42            | 356.47         | 0.002  | 0                        |
| 18            | 494.21         | 0.0001 | 0                        | 43            | 354.44         | 0.0004 | 0                        |
| 19            | 466.56         | 0.0339 | 0                        | 44            | 352.45         | 0      | 2                        |
| 20            | 459.24         | 0      | 2                        | 45            | 343.85         | 0      | 2                        |
| 21            | 444.16         | 0      | 2                        | 46            | 342.52         | 0      | 2                        |
| 22            | 442.18         | 0.0016 | 0                        | 47            | 341.85         | 0      | 2                        |
| 23            | 436.73         | 0.0117 | 0                        | 48            | 341.35         | 0.0001 | 0                        |
| 24            | 431.23         | 0      | 2                        | 49            | 338.38         | 0      | 2                        |
| 25            | 427.93         | 0      | 2                        | 50            | 337.93         | 0      | 2                        |

**Table S6.** TD-DFT calculated transitions 51-100 for [Ni(dtbbpy)(*o*-tolyl)I] (**1-I**) So.

| Excited State | $\lambda$ (nm) | f      | $\langle S^{*2} \rangle$ | Excited State | $\lambda$ (nm) | f      | $\langle S^{*2} \rangle$ |
|---------------|----------------|--------|--------------------------|---------------|----------------|--------|--------------------------|
| 51            | 336.25         | 0.0134 | 0                        | 76            | 277.53         | 0.0174 | 0                        |
| 52            | 332.32         | 0.0003 | 0                        | 77            | 277.32         | 0      | 2                        |
| 53            | 331.86         | 0      | 2                        | 78            | 276.06         | 0      | 2                        |
| 54            | 328.9          | 0      | 2                        | 79            | 275.2          | 0.001  | 0                        |
| 55            | 326.32         | 0.0039 | 0                        | 80            | 274.38         | 0      | 2                        |
| 56            | 321.1          | 0.0529 | 0                        | 81            | 273.26         | 0      | 2                        |
| 57            | 320.21         | 0.0118 | 0                        | 82            | 272.59         | 0.1272 | 0                        |
| 58            | 308.93         | 0      | 2                        | 83            | 271.36         | 0.0003 | 0                        |
| 59            | 304.58         | 0      | 2                        | 84            | 271.29         | 0      | 2                        |
| 60            | 303.49         | 0.0108 | 0                        | 85            | 270.49         | 0      | 2                        |
| 61            | 303.28         | 0      | 2                        | 86            | 269.03         | 0      | 2                        |
| 62            | 300.9          | 0      | 2                        | 87            | 267.84         | 0.0001 | 0                        |
| 63            | 300.4          | 0      | 2                        | 88            | 266.39         | 0      | 2                        |
| 64            | 297.72         | 0.0098 | 0                        | 89            | 264.65         | 0      | 2                        |
| 65            | 296.61         | 0.0001 | 0                        | 90            | 264.47         | 0.0014 | 0                        |
| 66            | 294.68         | 0.0002 | 0                        | 91            | 263.17         | 0      | 2                        |
| 67            | 294.36         | 0      | 2                        | 92            | 262.94         | 0.001  | 0                        |
| 68            | 291.83         | 0      | 2                        | 93            | 258.15         | 0      | 2                        |
| 69            | 290.4          | 0.0001 | 0                        | 94            | 254.99         | 0.0001 | 0                        |
| 70            | 288.65         | 0      | 2                        | 95            | 254.82         | 0      | 2                        |
| 71            | 286.27         | 0      | 2                        | 96            | 253.84         | 0.0052 | 0                        |
| 72            | 283.11         | 0      | 2                        | 97            | 253.08         | 0.0016 | 0                        |
| 73            | 280.41         | 0.1916 | 0                        | 98            | 252.57         | 0      | 2                        |
| 74            | 279.06         | 0      | 2                        | 99            | 249.71         | 0      | 2                        |
| 75            | 278.88         | 0.0359 | 0                        | 100           | 249.03         | 0      | 2                        |

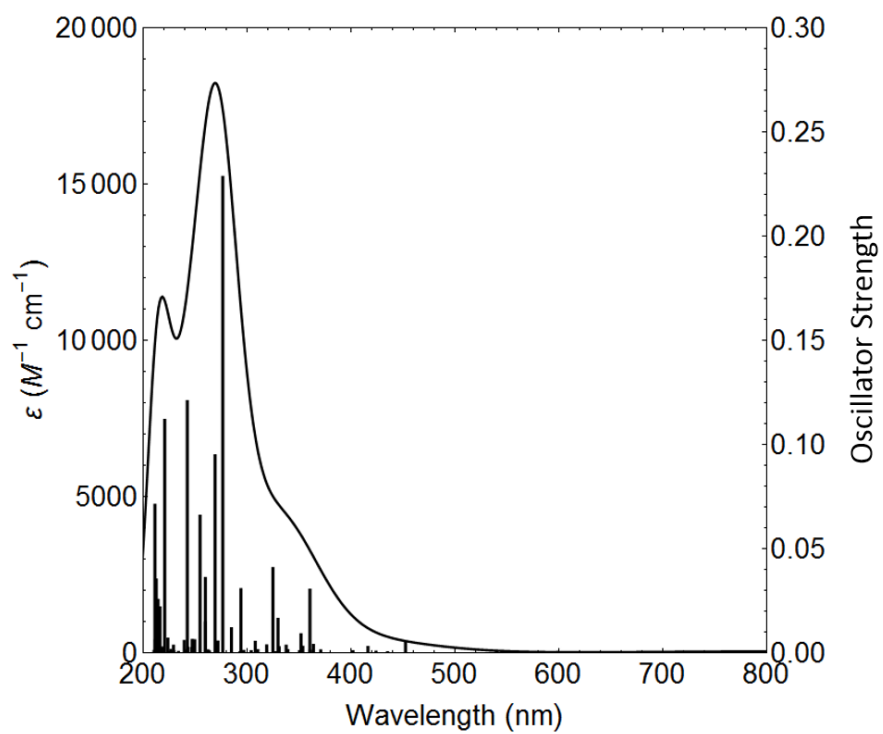

**Fig. S26.** Calculated absorption spectrum (solid black line) and TD-DFT calculated oscillators (solid bars: first 100 excited states) of [Ni(dtbbpy)Cl<sub>2</sub>](2) T<sub>0</sub>.

**Table S7.** TD-DFT calculated transitions 1-50 for [Ni(dtbbpy)Cl<sub>2</sub>](**2**) To.

| Excited State | $\lambda$ (nm) | f      | $\langle S^{*2} \rangle$ | Excited State | $\lambda$ (nm) | f      | $\langle S^{*2} \rangle$ |
|---------------|----------------|--------|--------------------------|---------------|----------------|--------|--------------------------|
| 1             | 1514.53        | 0.0005 | 2.004                    | 26            | 337.53         | 0.0032 | 2.826                    |
| 2             | 1479.07        | 0      | 2.005                    | 27            | 330.76         | 0.0024 | 2.126                    |
| 3             | 973.03         | 0.0001 | 2.005                    | 28            | 330.21         | 0.0015 | 3.107                    |
| 4             | 819.81         | 0      | 2.007                    | 29            | 329.66         | 0.016  | 2.045                    |
| 5             | 814.23         | 0.0011 | 2.008                    | 30            | 326.98         | 0.0001 | 2.985                    |
| 6             | 540.2          | 0.0001 | 2.011                    | 31            | 324.85         | 0.0404 | 2.438                    |
| 7             | 452.43         | 0.0049 | 3.202                    | 32            | 318.87         | 0.0033 | 3.052                    |
| 8             | 435.24         | 0.0001 | 3.08                     | 33            | 318.82         | 0      | 2.687                    |
| 9             | 424.01         | 0.0003 | 2.52                     | 34            | 310.27         | 0.001  | 2.898                    |
| 10            | 416.34         | 0.0025 | 2.802                    | 35            | 309.89         | 0      | 2.605                    |
| 11            | 401.8          | 0.0005 | 2.921                    | 36            | 309.37         | 0.0007 | 2.954                    |
| 12            | 389.08         | 0      | 2.754                    | 37            | 307.77         | 0.0051 | 3.79                     |
| 13            | 388.03         | 0      | 3.995                    | 38            | 303.94         | 0.0005 | 3.935                    |
| 14            | 370.85         | 0.0009 | 2.049                    | 39            | 300.11         | 0      | 3.01                     |
| 15            | 363.87         | 0.0035 | 3.073                    | 40            | 296.81         | 0.0007 | 2.976                    |
| 16            | 361.48         | 0      | 2.023                    | 41            | 295.63         | 0      | 2.997                    |
| 17            | 360.74         | 0.0008 | 2.178                    | 42            | 294.05         | 0.0303 | 2.053                    |
| 18            | 360.39         | 0.03   | 2.084                    | 43            | 293.23         | 0.0001 | 3.957                    |
| 19            | 354.86         | 0      | 2.049                    | 44            | 292.17         | 0      | 2.756                    |
| 20            | 353.58         | 0.0027 | 2.965                    | 45            | 286.24         | 0      | 2.096                    |
| 21            | 353.07         | 0      | 2.763                    | 46            | 285            | 0.0115 | 2.92                     |
| 22            | 351.84         | 0.0087 | 3.499                    | 47            | 281.26         | 0      | 2.737                    |
| 23            | 350.4          | 0.0006 | 2.996                    | 48            | 276.54         | 0.2282 | 2.082                    |
| 24            | 347.08         | 0      | 2.235                    | 49            | 276.08         | 0      | 3.994                    |
| 25            | 339.17         | 0.001  | 2.492                    | 50            | 273.95         | 0      | 3.004                    |

**Table S8.** TD-DFT calculated transitions 51-100 for [Ni(dtbbpy)Cl<sub>2</sub>](2) To.

| Excited State | $\lambda$ (nm) | f      | $\langle S^{*2} \rangle$ | Excited State | $\lambda$ (nm) | f      | $\langle S^{*2} \rangle$ |
|---------------|----------------|--------|--------------------------|---------------|----------------|--------|--------------------------|
| 51            | 272.96         | 0      | 2.984                    | 76            | 229.05         | 0.0001 | 3.03                     |
| 52            | 271.93         | 0.0052 | 3.196                    | 77            | 227.15         | 0.0005 | 3.018                    |
| 53            | 271.43         | 0.0039 | 2.194                    | 78            | 226.83         | 0      | 2.91                     |
| 54            | 269.25         | 0.0945 | 3.271                    | 79            | 226.56         | 0.0012 | 2.958                    |
| 55            | 263.58         | 0.0004 | 3.95                     | 80            | 224.29         | 0      | 3.027                    |
| 56            | 263.14         | 0.0003 | 2.989                    | 81            | 224.09         | 0.0002 | 2.765                    |
| 57            | 262.49         | 0.0009 | 2.908                    | 82            | 223.7          | 0.0066 | 2.596                    |
| 58            | 260.96         | 0      | 2.031                    | 83            | 220.64         | 0.1116 | 2.719                    |
| 59            | 259.83         | 0.0357 | 2.084                    | 84            | 219.18         | 0.0003 | 2.976                    |
| 60            | 259.71         | 0.0143 | 2.457                    | 85            | 218.85         | 0.0017 | 2.544                    |
| 61            | 258.19         | 0      | 2.024                    | 86            | 218.71         | 0.0023 | 2.971                    |
| 62            | 254.69         | 0.0655 | 2.557                    | 87            | 216.34         | 0      | 2.034                    |
| 63            | 249.52         | 0.0058 | 2.991                    | 88            | 216.17         | 0.0216 | 2.553                    |
| 64            | 247.16         | 0.0059 | 3.048                    | 89            | 215.49         | 0      | 3.001                    |
| 65            | 246.74         | 0      | 2.903                    | 90            | 215.09         | 0      | 2.984                    |
| 66            | 246.61         | 0.0021 | 3.7                      | 91            | 214.64         | 0.0001 | 2.039                    |
| 67            | 242.78         | 0.0022 | 3.583                    | 92            | 214.54         | 0      | 3.006                    |
| 68            | 242.49         | 0.1206 | 2.53                     | 93            | 214.36         | 0.0252 | 3.435                    |
| 69            | 241.05         | 0.0008 | 2.986                    | 94            | 214.34         | 0      | 3.011                    |
| 70            | 239.56         | 0.0054 | 2.503                    | 95            | 213.96         | 0.0002 | 2.981                    |
| 71            | 238.59         | 0      | 2.692                    | 96            | 212.94         | 0.001  | 3.077                    |
| 72            | 234.46         | 0      | 2.541                    | 97            | 212.62         | 0.0349 | 2.317                    |
| 73            | 233.99         | 0.0002 | 2.974                    | 98            | 211.72         | 0.0058 | 3.185                    |
| 74            | 229.42         | 0.0005 | 2.967                    | 99            | 211.29         | 0.0708 | 2.191                    |
| 75            | 229.16         | 0.0032 | 2.97                     | 100           | 210.46         | 0.0007 | 2.047                    |

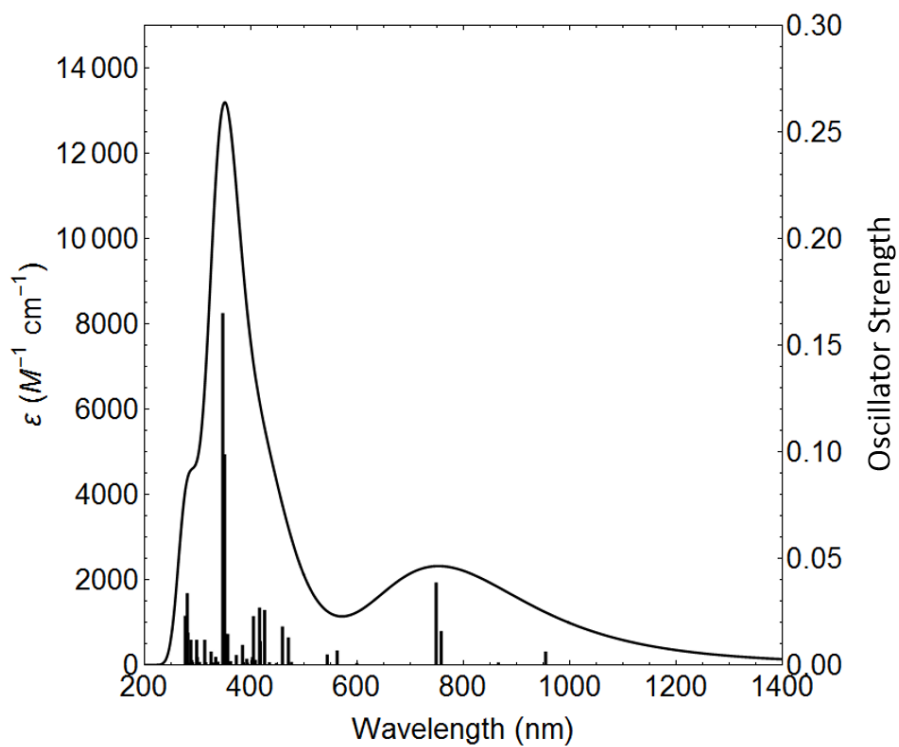

**Fig. S27.** Calculated absorption spectrum (solid black line) and TD-DFT calculated oscillators (solid bars: first 50 excited states) of geometry optimized [Ni(dtbbpy)(*o*-tolyl)Cl](1-Cl) T<sub>1</sub>.



Difference Density Isosurfaces. Mapped difference density isosurfaces were generated by subtracting the electron density from total SCF density for the ground state from the electron density from total SCF density of a given excited state. All calculations were carried out at constant isovalue (0.0004).

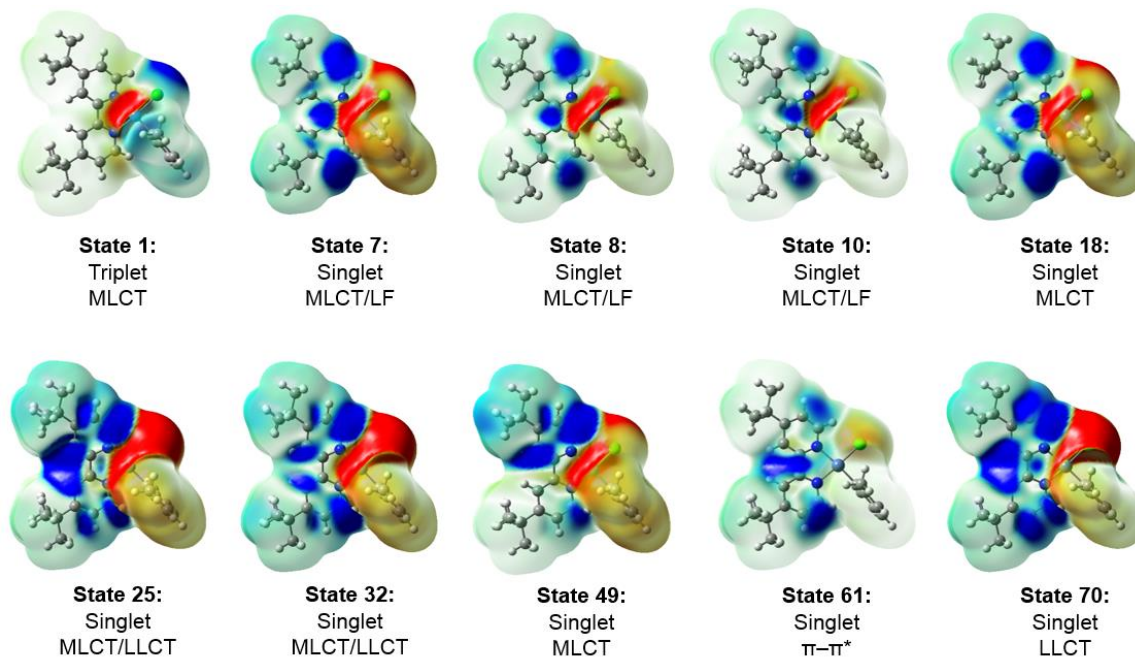

**Figure S28.** Difference density isosurfaces for select calculated transitions for  $[\text{Ni}(\text{dtbbpy})(o\text{-tolyl})\text{Cl}](1\text{-Cl}) S_0$  displayed with multiplicity and transition assignments. Difference density isosurfaces demonstrate the loss (red) and build-up (blue) of electron density.

Natural Population Analysis. Atomic charges for **1-Cl** in various electronic states were computed via Natural Population Analysis (NPA) to quantify MLCT character. First the difference in atomic charge

$$\Delta\delta\text{Ni}_{\text{ES}} = \delta\text{Ni}_{\text{ES}} - \delta\text{Ni}_{\text{GS}}$$

between each excited state ( $\delta\text{Ni}_{\text{ES}}$ ) and the ground state ( $\delta\text{Ni}_{\text{GS}}$ ) were calculated. Next the charge differences  $\Delta\delta\text{Ni}_{\text{ES}}$  were normalized against the difference in atomic charge between Ni(III) **1-Cl**<sup>+</sup> ( $\delta\text{Ni}_{\text{III}}$ ) and Ni(II) **1-Cl** ( $\delta\text{Ni}_{\text{GS}}$ ) ground state at constant geometry according to

$$\overline{\Delta\delta\text{Ni}_{\text{ES}}} = \frac{\Delta\delta\text{Ni}_{\text{ES}}}{\delta\text{Ni}_{\text{III}} - \delta\text{Ni}_{\text{GS}}}$$

where  $\overline{\Delta\delta\text{Ni}_{\text{ES}}}$  is the normalized change in charge associated with a given transition such that  $\delta\text{Ni}_{\text{III}} - \delta\text{Ni}_{\text{GS}} = 1$ . When  $\overline{\Delta\delta\text{Ni}_{\text{ES}}} \approx 1$  the change in charge on Ni is similar to the change in charge associated with formal oxidation of the complex, indicating a transition with significant MLCT character.

**Table S9.** Natural population analysis of select calculated transitions for [Ni(dtbbpy)(*o*-tolyl)Cl](**1-Cl**) S<sub>0</sub>. Note that T<sub>1</sub>(opt) is the geometry optimized first triplet state while ES1 is the vertical transition computed via TD-DFT.

| State                 | $\delta\text{Ni}$ | $\Delta\delta\text{Ni}$ | $\overline{\Delta\delta\text{Ni}_{\text{ES}}}$ |
|-----------------------|-------------------|-------------------------|------------------------------------------------|
| GS                    | 0.40647           | -                       | -                                              |
| Ni(III)               | 0.77543           | 0.36896                 | 1.00                                           |
| T <sub>1</sub> (opt)  | 0.74438           | 0.33791                 | 0.92                                           |
| ES1 (T <sub>1</sub> ) | 0.85778           | 0.45131                 | 1.22                                           |
| ES7 (S <sub>1</sub> ) | 0.75710           | 0.35063                 | 0.95                                           |
| ES8                   | 0.71071           | 0.30424                 | 0.82                                           |
| ES10                  | 0.68026           | 0.27379                 | 0.74                                           |
| ES18                  | 0.70966           | 0.30319                 | 0.82                                           |
| ES25                  | 0.65403           | 0.24756                 | 0.67                                           |
| ES32                  | 0.65570           | 0.24923                 | 0.68                                           |
| ES49                  | 0.68935           | 0.28288                 | 0.77                                           |
| ES61                  | 0.41286           | 0.00639                 | 0.02                                           |
| ES70                  | 0.52779           | 0.12132                 | 0.33                                           |

Simulating  ${}^3\text{MLCT}_1$  Ni(dtbbpy)(*o*-tolyl)Cl  $\Delta A$  Spectrum. The difference absorption spectrum for  ${}^3\text{MLCT}_1$  **1-Cl** was simulated by subtraction of the steady state absorption spectrum of Ni(II) from the computed triplet-triplet absorption spectrum.

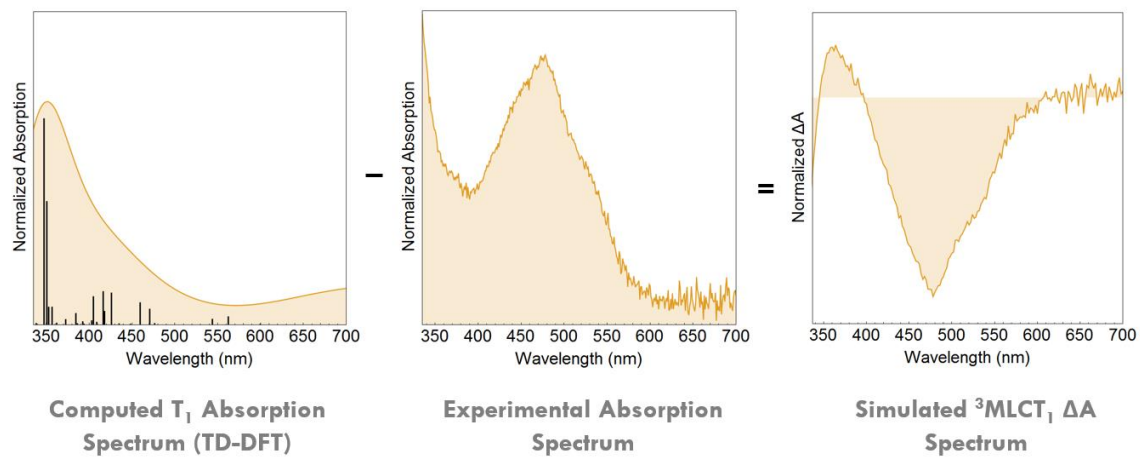

**Fig. S29.** Method for simulating transient absorption spectrum for  ${}^3\text{MLCT}_1$  **1-Cl**.

**Excited State Redox Potentials.** The excited state reduction potentials for  ${}^3\text{MLCT}_1$  Ni(dtbbpy)(*o*-tolyl)Cl were calculated from the ground state peak potentials for the first reduction and first oxidation, measured via cyclic voltammetry, and computed free energy difference between  $S_0$  and  ${}^3\text{MLCT}_1$  computed via DFT (B3LYP/TZVP).

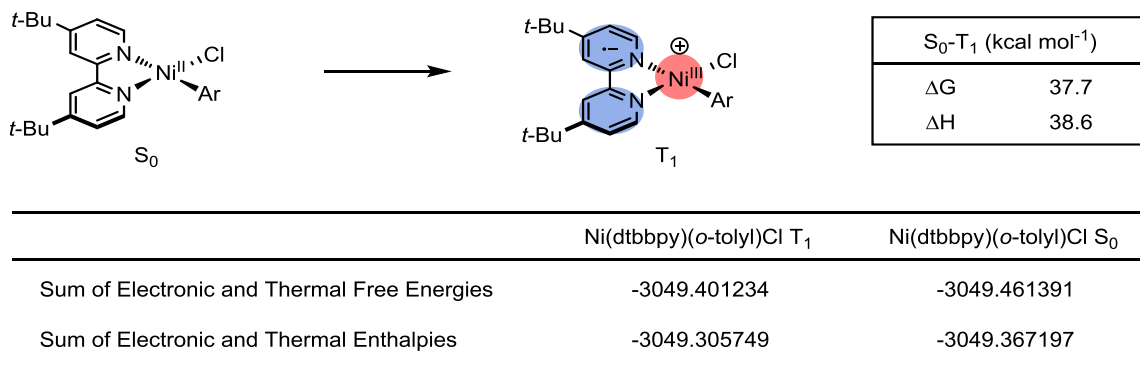

**Fig. S30.** DFT calculated  $\Delta\text{SCF } S_0-T_1$  gap for Ni(dtbbpy)(*o*-tolyl)Cl (**1-Cl**). Tabulated energies are in hartrees.

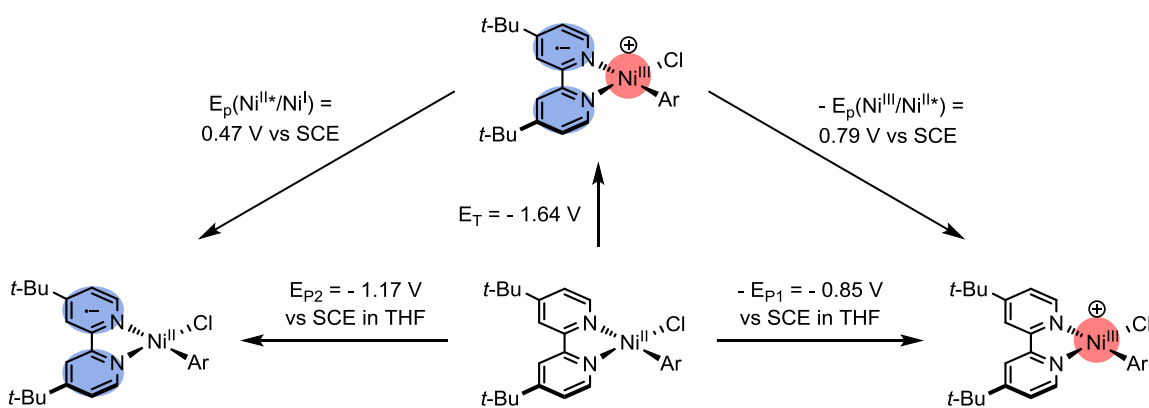

**Fig. S31.** Thermodynamic cycle summarizing ground state and excited state reduction potentials for Ni(dtbbpy)(*o*-tolyl)Cl (**1-Cl**).

**Spin State of Ni(dtbbpy)Cl<sub>2</sub>.** The spin state of Ni(dtbbpy)Cl<sub>2</sub> was predicted via DFT from the computed free energy difference between geometry optimized singlet and triplet structures.

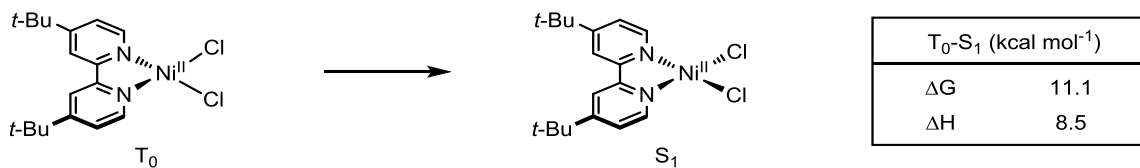

|                                             | Ni(dtbbpy)Cl <sub>2</sub> T <sub>0</sub> | Ni(dtbbpy)Cl <sub>2</sub> S <sub>1</sub> |
|---------------------------------------------|------------------------------------------|------------------------------------------|
| Sum of Electronic and Thermal Free Energies | -3238.810536                             | -3238.792782                             |
| Sum of Electronic and Thermal Enthalpies    | -3238.724621                             | -3238.711147                             |

**Fig. S32.** DFT calculated T<sub>0</sub>-S<sub>1</sub> gap for Ni(dtbbpy)Cl<sub>2</sub> (**2**). Tabulated energies are in hartrees. The triplet optimized to a tetrahedral geometry while the singlet optimized to a square planar geometry.

**C–O Cross Coupling Thermodynamics.** A preliminary evaluation of the thermodynamics for C–O reductive elimination from possible Ni(II) and Ni(III) intermediates in C–O coupling experiments was carried out via DFT. The favorability for aryl halide oxidative addition with Ni(I)(dtbbpy)(OR) complexes was evaluated to probe the possibility of a photoinitiated thermal C–O cycle proceeding via a Ni(I)/Ni(III) cycle.

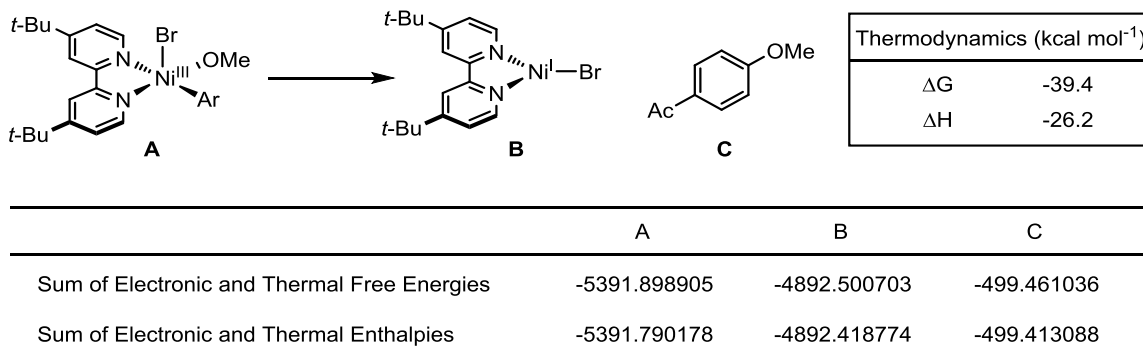

**Fig. S33.** DFT calculated Ni(III) C–O reductive elimination thermodynamics. Tabulated energies are in hartrees.

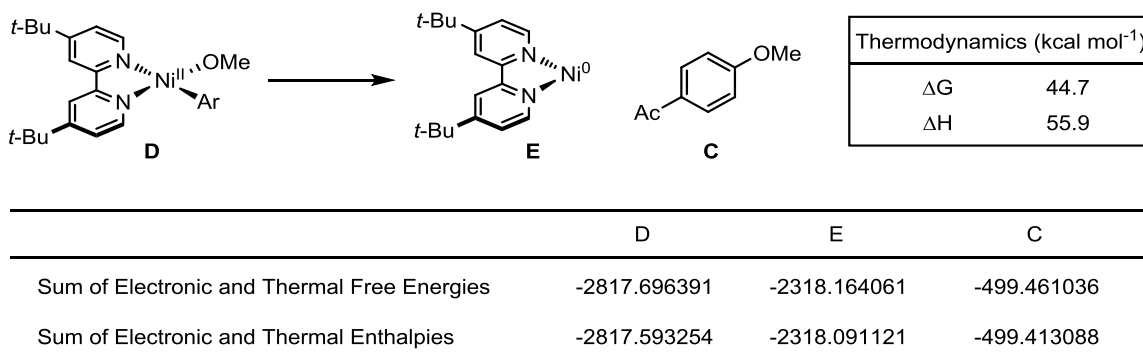

**Fig. S34.** DFT calculated Ni(II) C–O reductive elimination thermodynamics. Tabulated energies are in hartrees.

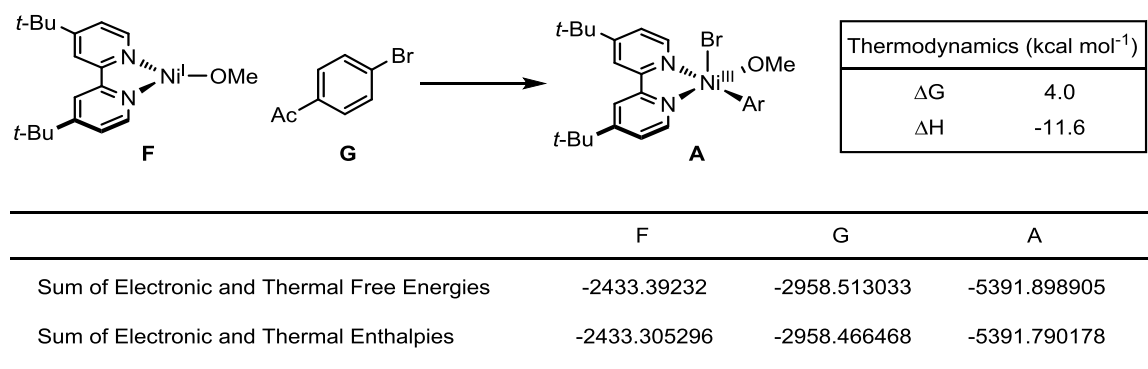

**Fig. S35.** DFT calculated Ni(I) oxidative addition thermodynamics. Tabulated energies are in hartrees.

## V. Ultrafast Transient Absorption Spectroscopy

Primer. Transient absorption spectroscopy is a time-resolved technique which allows the tracking of how a photoexcited molecule evolves from its original photoexcited state either to other states or back to the ground state. Sometimes called pump-probe spectroscopy, this technique relies on an actinic “pump” pulse of light which is resonant with an electronic transition in the sample to bring it to an excited electronic state. This photoexcited state can have a completely distinct absorption spectrum from the ground state, meaning that it can absorb different wavelengths of light. The absorption spectrum of this transient species (hence, transient absorption spectroscopy) is measured by directing a polychromatic probe pulse to the same sample position and measuring its transmission. In this work, we use a “white light” probe, composed of a broad bandwidth of light ranging from 350 to 775 nm. The difference in the transmission of the probe pulse through the sample with and without a preceding pump pulse constitutes a transient absorption spectrum.

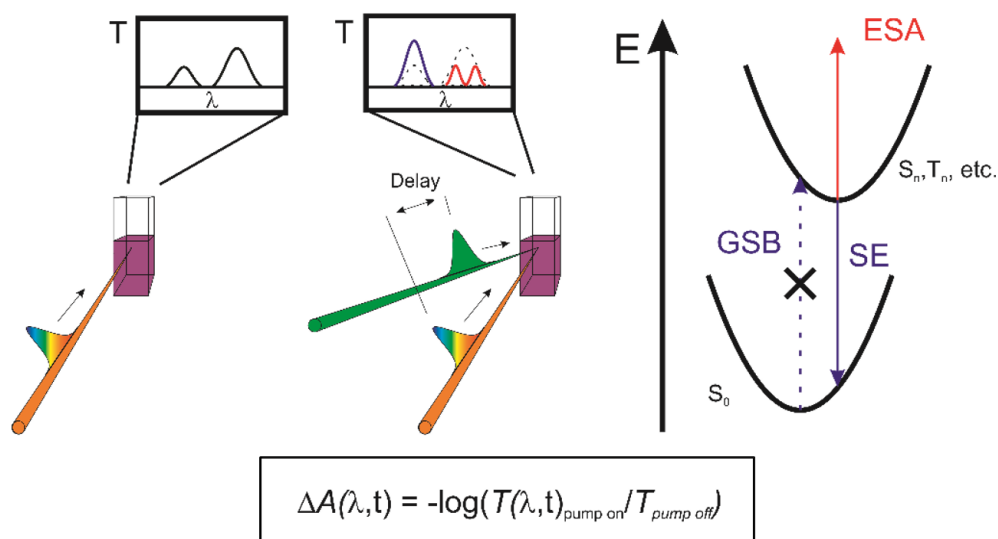

**Fig. S36.** General principles of transient absorption spectroscopy.

There are three main types of signals in a transient absorption spectrum. One negative signal is the ground state bleach (GSB). GSB signals arise from the depletion of the sample's ability to absorb light at a particular wavelength because some of the absorbers in that sample are in the excited state. While common conceptions of photobleaching in organic chemistry usually occur due to decomposition of the absorbing unit, the GSB signal we refer to is a transient bleaching signal due to generally distinct absorbing properties of the system measured. In practice, the GSB signal is visible if the probe spectral bandwidth encompasses absorption features of the sample, and it decays with the lifetime of the overall excited-state lifetime of the sample itself. For example, if the sample was first photoexcited into a singlet state and then underwent intersystem crossing to form a triplet state, the GSB would only decay with the lifetime of the triplet state.

Another negative signal is the stimulated emission (SE). SE signals arise when the probe photon interacts with an emissive electronically excited state, stimulating that entity to relax to a lower electronic state with the emission of a photon with energy equal to the



difference in the energies of the two states. This SE signal normally presents itself at the wavelengths associated with a sample's emission spectrum while that sample is in a photoexcited emissive states. For systems with small Stokes' shift<sup>39</sup>, this signal is usually overlapping with the GSB, although with independent dynamics. Hence, the conversion from some initial photoexcited state to some non-emissive state, i.e. a triplet, would result in the decay of the SE feature in the TA spectrum. Further, if a sample is excited to some excited state higher than that ( $S_n$ ) of the lowest excited state singlet ( $S_1$ ), there would first be an SE signal associated with the  $S_n$  state with the formation of the  $S_1$  SE arising with the rate of the internal conversion of  $S_n$  to  $S_1$ .

Positive signals in the TA spectra are the excited-state absorptions (ESA), sometimes also denoted photo-induced absorptions (PIA). ESA signals arise from new electronic transitions that are available from the new photoexcited states. The spectral positioning of these signals is not only dependent on the existence of energy levels accessible by the various wavelengths of light in the probe pulse, but also the extinction coefficient of those transitions according to optical selection rules. One example is that of intersystem crossing (ISC), where an excitation that originates on the singlet spin manifold relaxes to a state on the triplet manifold. In the singlet manifold, transitions to other higher lying singlet excited states accessible within the probe photon energies are likely observed as ESA signals—after the ISC, a new set of ESA signals corresponding to transitions to higher lying triplet excited states are now observed where they weren't before due to the spin optical selection rule. The evolution from one set of ESA features to another is usually assigned to some excited state dynamics which can take many forms, although the existence of an excited state absorption evolution without supplementary experimental or computational confirmations does not necessarily designate a specific excited-state process.

While the features themselves are a major component of TA spectroscopy, the ability to track their evolutions in time is the key aspect of this technique. By delaying the probe pulse with respect to the pump pulse, our experiments allow the excited state to evolve independently for a controllable amount of time before interrogating the excited state of the system with the probe pulse. As suggested previously, different excited states will likely have different transient features, such that the interconversion from one state to another can be tracked by the evolution of one state's features to another's. Hence, if a particular feature is associated with a particular excited state, like SE and ESA features usually are, correlating the disappearance or appearance of these features with the pump-probe delays over which the evolution occurs allows a designation of a kinetics for that conversion.

Figure S37A shows a TA map, which reports the excited state dynamics of **1-Cl** upon photoexcitation at 295 nm, which is particularly instructive because it is composed of both positive and negative signals dictated by the existence of GSB, SE, and ESA as described above. In this map, horizontal slices at particular pump probe delays report the transient spectrum at that delay (Figure S37B), while vertical slices at particular wavelengths reports the intensity of the transient absorption (positive for ESA, negative for GSB and SE) at that wavelength over the pump-probe delays investigated (Figure S37C). As noted in Figure 2b, an excitation of the **1-Cl** with 295 nm light will excite a predominantly dtbbpy centered transition, formally a high-lying singlet transition of the entire complex. Hence, the signals we might expect at early-pump probe delays would consist of the ESA signatures of the dtbbpy transition, which are peaks at 390, 520, and 740 nm, with the inclusion of the bleach features of the entire complex's absorption, which with the use of the visible probe, should

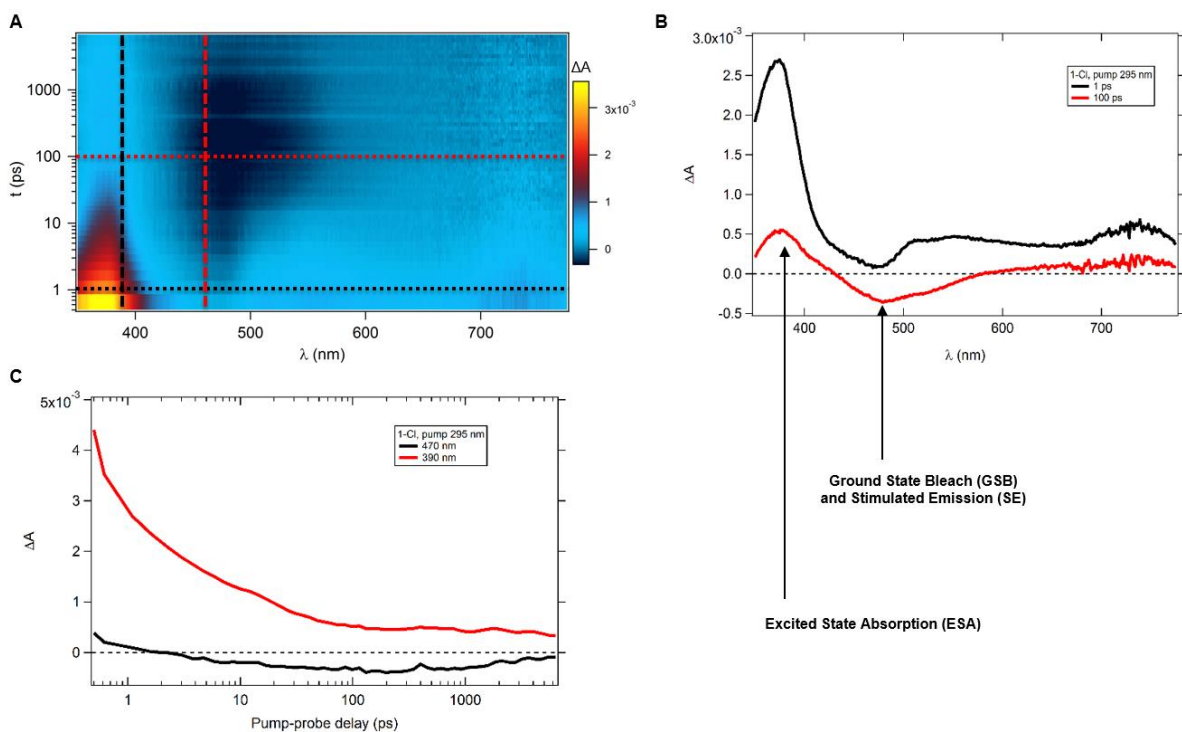

**Fig. S37.** Data summary and analysis of transient absorption spectra. (A) TA contour map with horizontal dotted lines corresponding to the transient spectrum at the reported time delay (B) and vertical lines corresponding to single wavelength kinetic traces (C).

appear as a negative feature at 470 nm. Indeed, at early times, meaning small pump-probe delays, this is exactly what is observed. Furthermore, we can motivate the internal conversion from this predominantly dtbbpy-centered transition to a  $^1\text{MLCT}$ -type excited state by the reduction of ESA intensities assigned to the dtbbpy-centered excited state with an increase in the intensity of the negative signal near the GSB maximum, which is likely a formation of a SE signal. It is exactly this type of signal analysis which informs our assignments of the excited-state dynamics in this work.

Methods. A 1 kHz regeneratively amplified Ti:Sapphire laser (Coherent Libra, Santa Clara, California) with an output pulse duration of approximately 45 fs centered at 800 nm with output power 3.6 W is split with a 90-10 beamsplitter to generate the pump and probe. To generate the pump, the reflected portion of the Ti:Sapphire output is directed into a commercial optical parametric amplifier (OPerA Solo, Vilnius, Lithuania), which in our work we use to generate light at 295, 400, and 412 nm. Both the output of the OPerA Solo as well as the remainder of the originally transmitted 800 nm light were directed into a commercial transient absorption spectrometer (Ultrafast Systems Helios, Sarasota, Florida). The pump pulse is chopped at 500 Hz and is focused with a 500 mm focal length lens to the sample position. In the case of the experiments using 412 nm pump pulses, a broadband  $\lambda/2$  waveplate was used to control its polarization, resulting in a pulse duration of approximately 100 fs. For the experiments using 400 nm light, neutral density filters were removed from the pump beam path and instead of a 500 mm focal length lens to focus the beam, we instead use a 400 nm high reflective spherical mirror with a 300 mm focal length to achieve a  $<100$  fs pulse duration.

The remaining 800 nm light is first passes onto a delay stage before passing through a  $\lambda/2$  waveplate and polarizer combination to control its intensity and polarization before being focused into a either a 2 mm thick translating CaF<sub>2</sub> crystal to generate a white light continuum from 325 nm to 800 nm or a 2 mm thick sapphire crystal to generate a white light continuum from 425 to 800 nm. The white light was then sent through a filter to remove the remaining fundamental light. A variable neutral density filter takes a portion of the probe light after the filter and directs the reflected portion to a separate camera for balance detection, whereas the transmitted portion is focused into the sample. The samples were prepared in a N<sub>2</sub>-filled glovebox using 1 mm quartz cuvette (Starna Cells, Inc., Atascadero, California) equipped with a septum cap or a 2 mm optical glass cuvette (Starna Cells, Inc., Atascadero, California) which was adapted in house with a J. Young fitting and were stirred during experiments using a magnetic stirrer. All experiments were done at magic angle to avoid reorientation effects of the samples—in the case of the experiments photoexciting at 295 nm or 400 nm, the relative polarization angles between the pump and probe were controlled using the polarizer before the white light generation, as the polarization of the supercontinuum does not deviate from the incoming polarization of light.

The resultant data were background subtracted by subtracting the averaged transient spectra before the coherent artifact. Scattering peaks appear as positive signals at long pump-probe delays possibly due to minor changes in probe transmission at different delay stage positions, as well as alternating positive and negative peaks reflecting small fluctuations in pump power. The coherent artifact was also fit to a polynomial to correct for the temporal chirp in the TA maps. For samples which displayed degradation over the course of the experiment, only the first 50 scans were averaged for post-processing and analysis, which with 1s averaging per point and  $\sim 200$  points per scan, corresponds to  $\sim 3$  hours of experiment time analyzed.

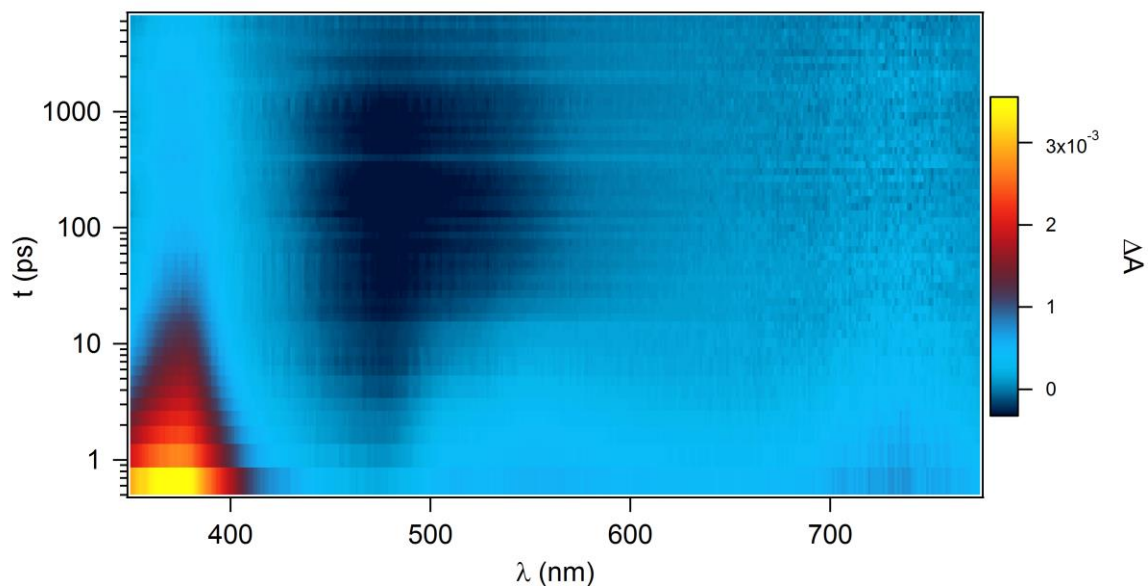

**Fig. S38.** Contour plot for transient absorption spectra of Ni(dtbbpy)(*o*-tolyl)Cl (**1-Cl**) after photoexcitation at 295 nm (pump power = 20  $\mu$ W, first 50 scans, CaF<sub>2</sub> probe, 1mm quartz cuvette).

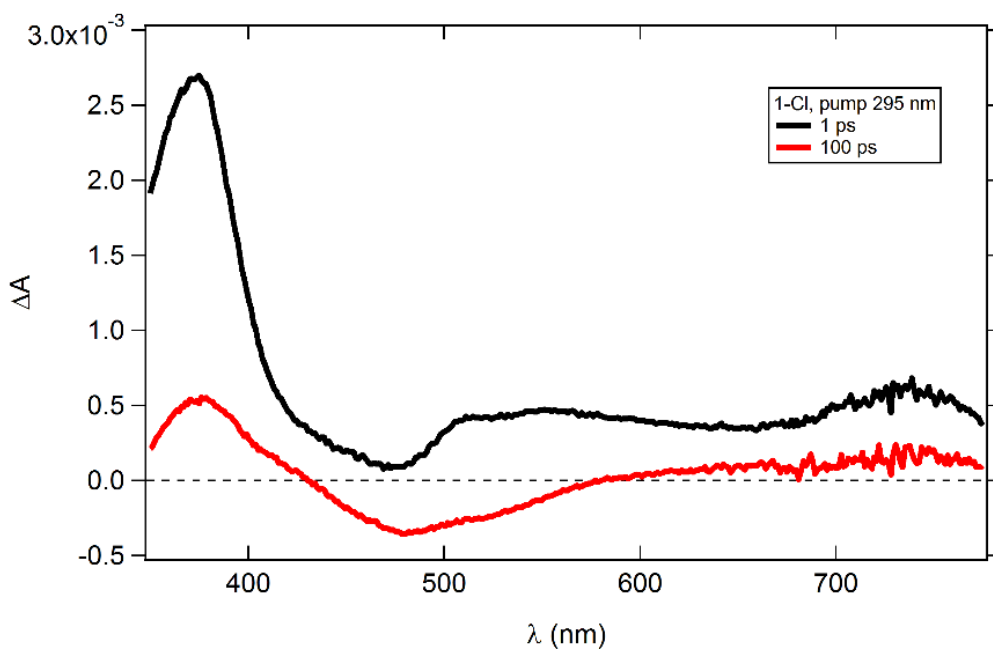

**Fig. S39.** Transient absorption spectra of Ni(dtbbpy)(*o*-tolyl)Cl (**1-Cl**) after photoexcitation at 295 nm at select probe delays (pump power = 20  $\mu$ W, first 50 scans, CaF<sub>2</sub> probe, 1mm quartz cuvette).

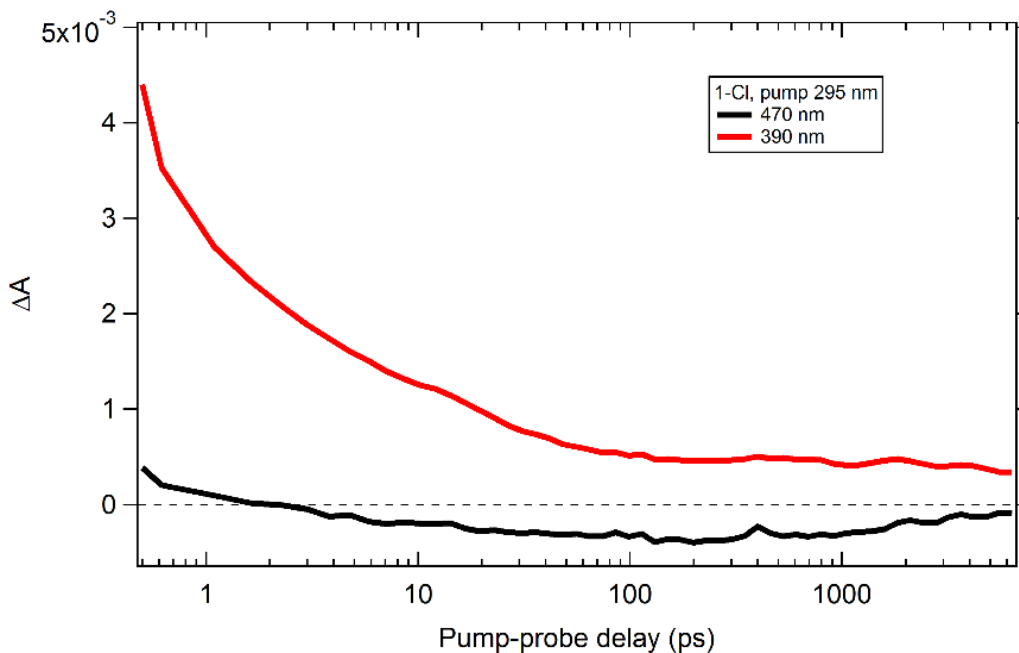

**Fig. S40.** Single wavelength kinetics for transient absorption spectra of Ni(dtbbpy)(*o*-tolyl)Cl (**1-Cl**) after photoexcitation at 295 nm at select wavelengths (pump power = 20  $\mu$ W, first 50 scans, CaF<sub>2</sub> probe, 1mm quartz cuvette).

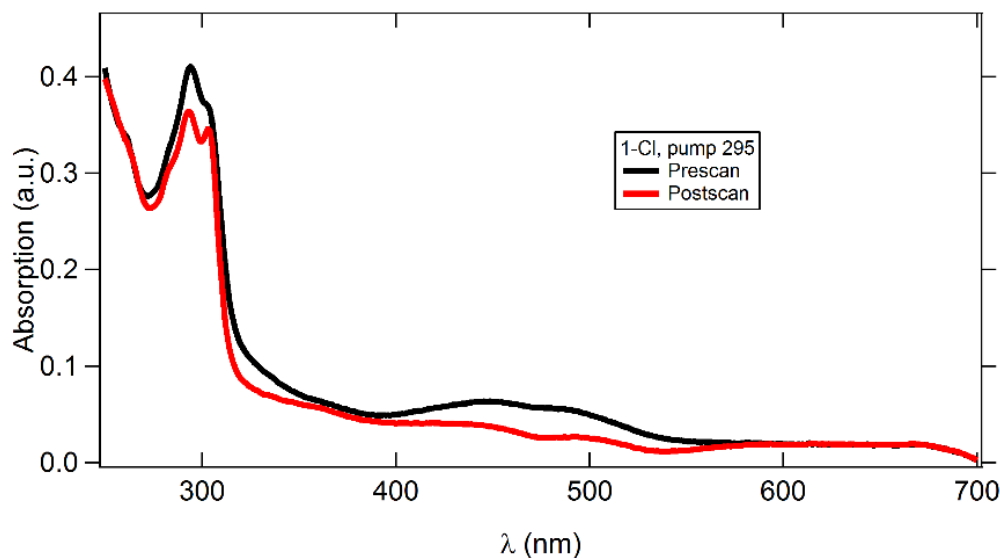

**Fig. S41.** Absorption spectra of Ni(dtbbpy)(*o*-tolyl)Cl (**1-Cl**) before and after transient absorption experiment (295 nm photoexcitation, pump power = 20  $\mu$ W, 115 total scans, CaF<sub>2</sub> probe, 1mm quartz cuvette).

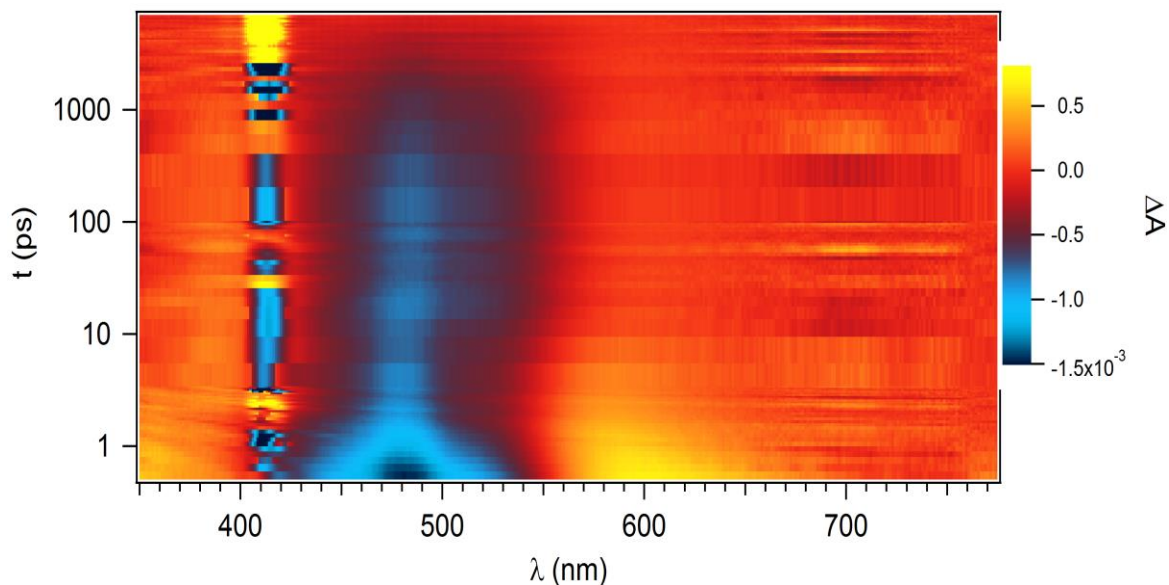

**Fig. S42.** Contour plot for transient absorption spectra of Ni(dtbbpy)(*o*-tolyl)Cl (**1-Cl**) after photoexcitation at 412 nm (pump power = 800  $\mu$ W, 46 scans, CaF<sub>2</sub> probe, 2mm optical glass cuvette).

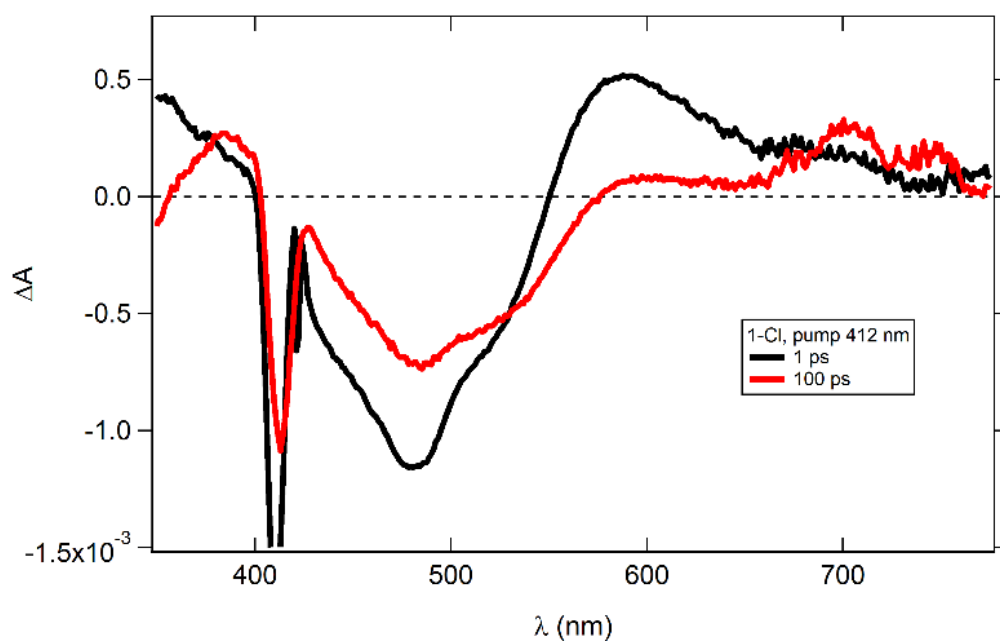

**Fig. S43.** Transient absorption spectra of Ni(dtbbpy)(*o*-tolyl)Cl (**1-Cl**) after photoexcitation at 412 nm at select probe delays (pump power = 800  $\mu$ W, 46 scans, CaF<sub>2</sub> probe, 2mm optical glass cuvette).

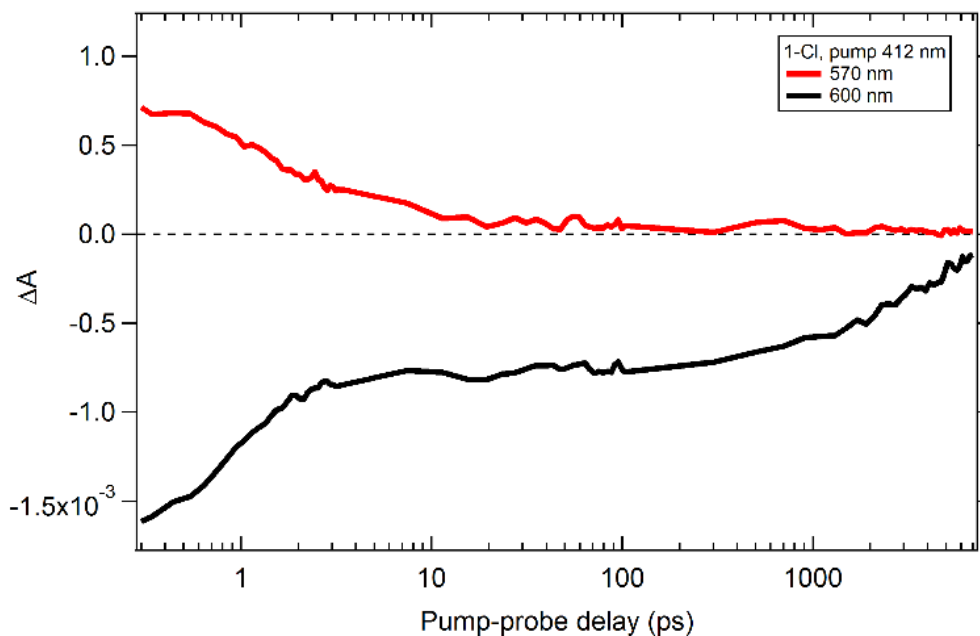

**Fig. S44.** Single wavelength kinetics for transient absorption spectra of Ni(dtbbpy)(*o*-tolyl)Cl (**1-Cl**) after photoexcitation at 412 nm at select wavelengths (pump power = 800  $\mu$ W, 46 scans, CaF<sub>2</sub> probe, 2mm optical glass cuvette).

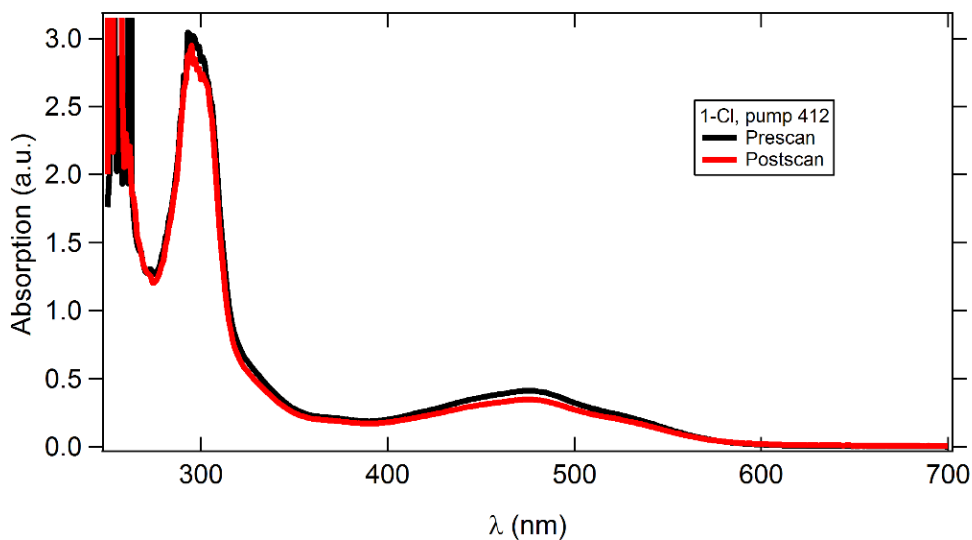

**Fig. S45.** Absorption spectra of Ni(dtbbpy)(*o*-tolyl)Cl (**1-Cl**) before and after transient absorption experiment (412 nm photoexcitation, pump power = 800  $\mu$ W, 46 total scans, CaF<sub>2</sub> probe, 2mm optical glass cuvette).

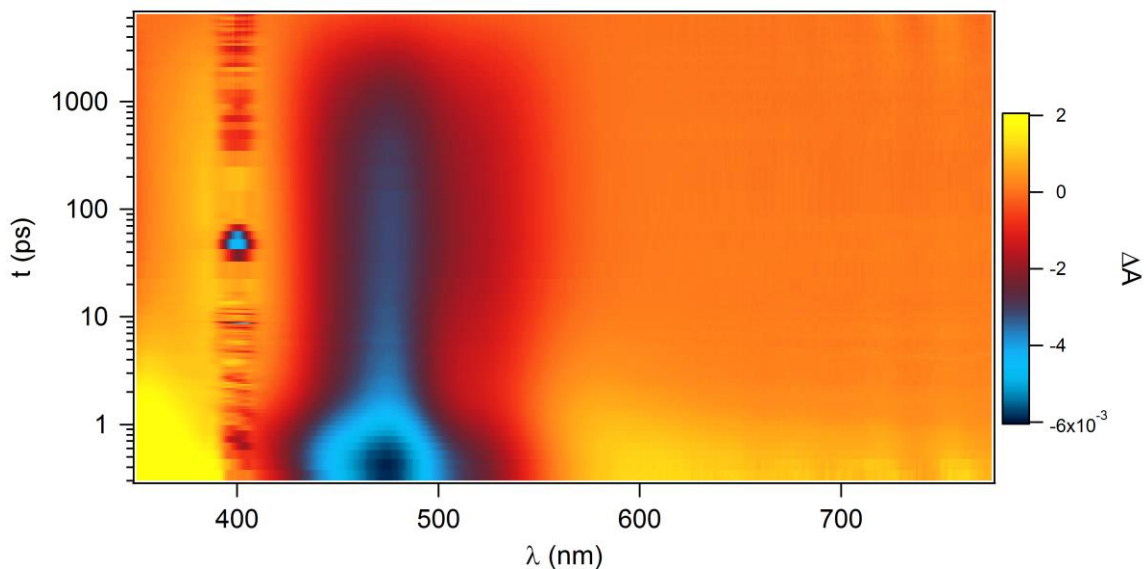

**Fig. S46.** Contour plot for transient absorption spectra of Ni(dtbbpy)(*o*-tolyl)Cl (**1-Cl**) after photoexcitation at 400 nm (pump power = 500  $\mu$ W, first 50 scans, CaF<sub>2</sub> probe, 2mm optical glass cuvette).

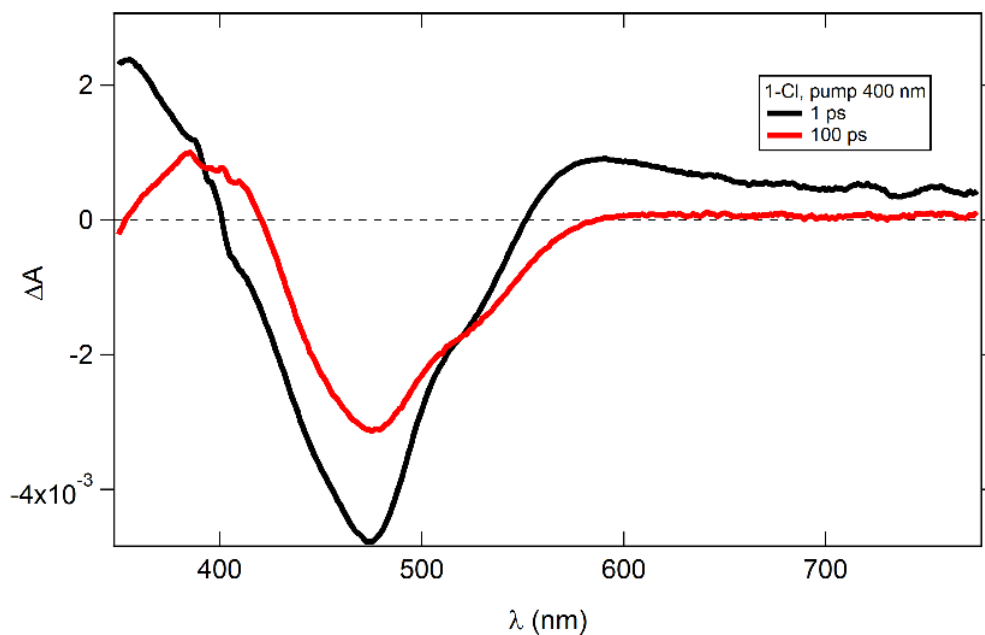

**Fig. S47.** Transient absorption spectra of Ni(dtbbpy)(*o*-tolyl)Cl (**1-Cl**) after photoexcitation at 400 nm at select probe delays (pump power = 500  $\mu$ W, first 50 scans, CaF<sub>2</sub> probe, 2mm optical glass cuvette).



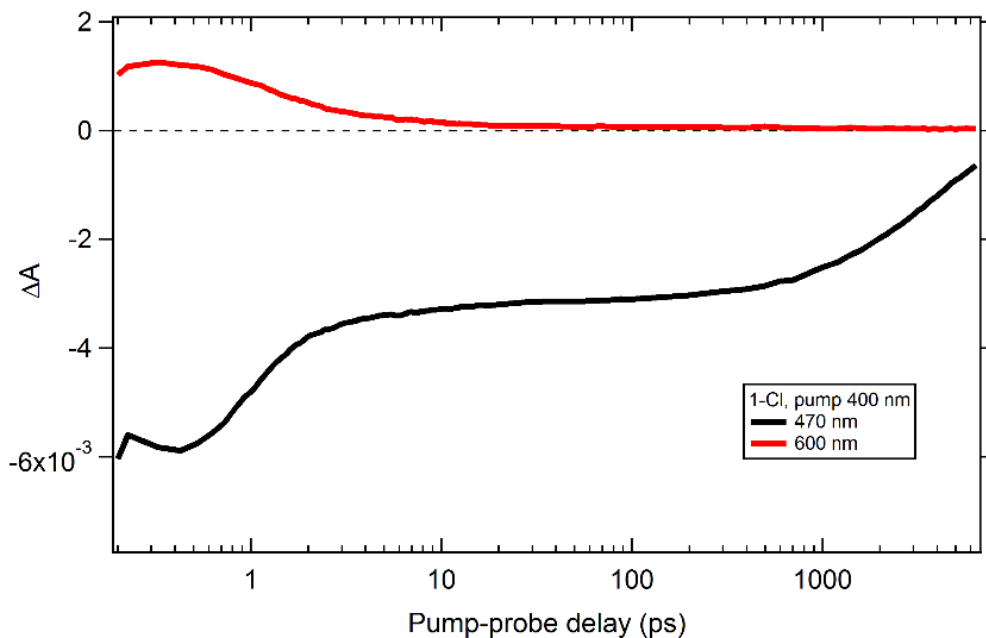

**Fig. S48.** Single wavelength kinetics for transient absorption spectra of Ni(dtbbpy)(*o*-tolyl)Cl (**1-Cl**) after photoexcitation at 400 nm at select wavelengths (pump power = 500  $\mu$ W, first 50 scans, CaF<sub>2</sub> probe, 2mm optical glass cuvette).

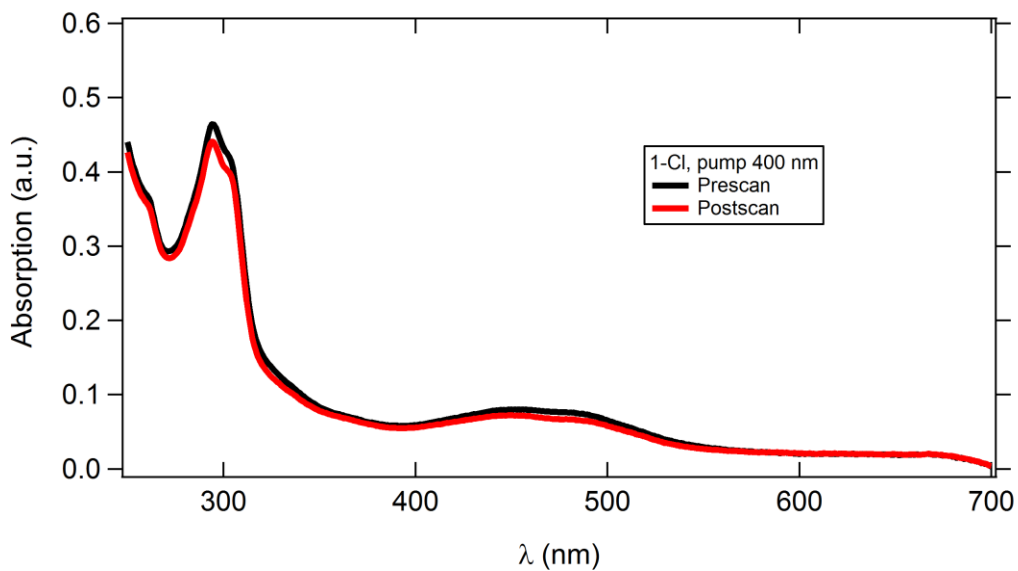

**Fig. S49.** Absorption spectra of Ni(dtbbpy)(*o*-tolyl)Cl (**1-Cl**) before and after transient absorption experiment (400 nm photoexcitation, pump power = 500  $\mu$ W, 229 total scans, CaF<sub>2</sub> probe, 2mm optical glass cuvette).

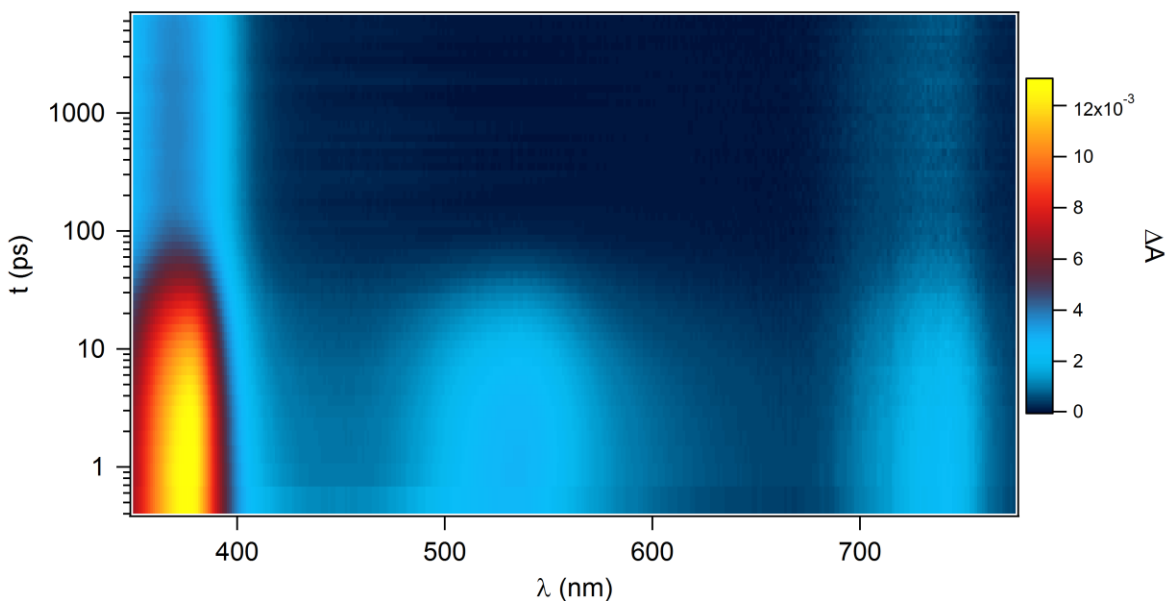

**Fig. S50.** Contour plot for transient absorption spectra of 4,4'-di-*tert*-butyl-2,2'-bipyridine after photoexcitation at 305 nm (pump power = 10  $\mu$ W, 100 scans, CaF<sub>2</sub> probe, 1mm quartz cuvette).

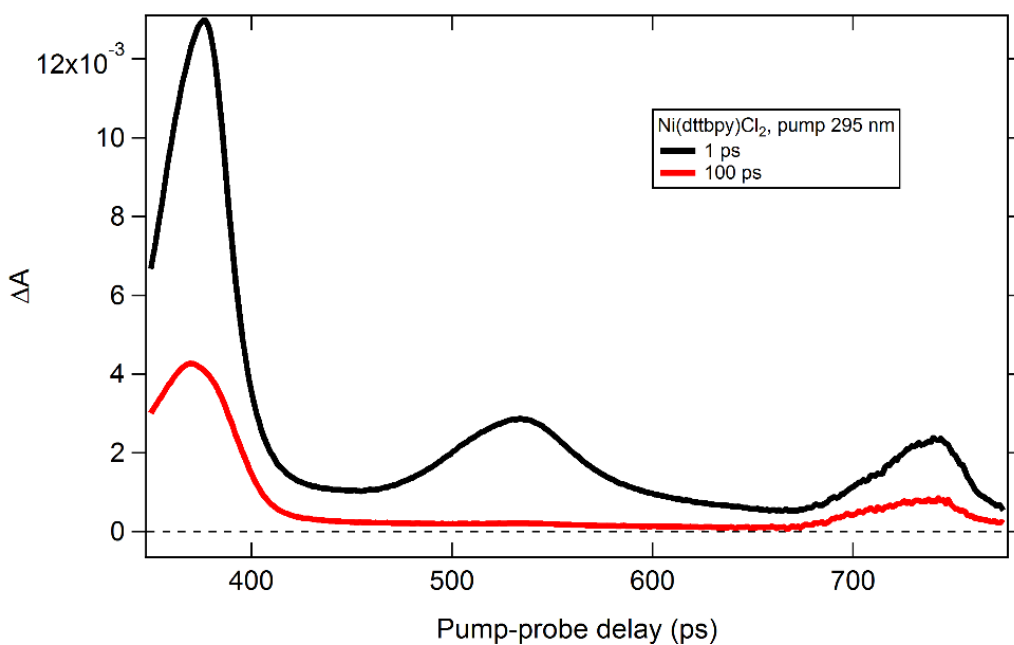

**Fig. S51.** Transient absorption spectra of 4,4'-di-*tert*-butyl-2,2'-bipyridine after photoexcitation at 305 nm at select probe delays (pump power = 10  $\mu$ W, 100 scans, CaF<sub>2</sub> probe, 1mm quartz cuvette).

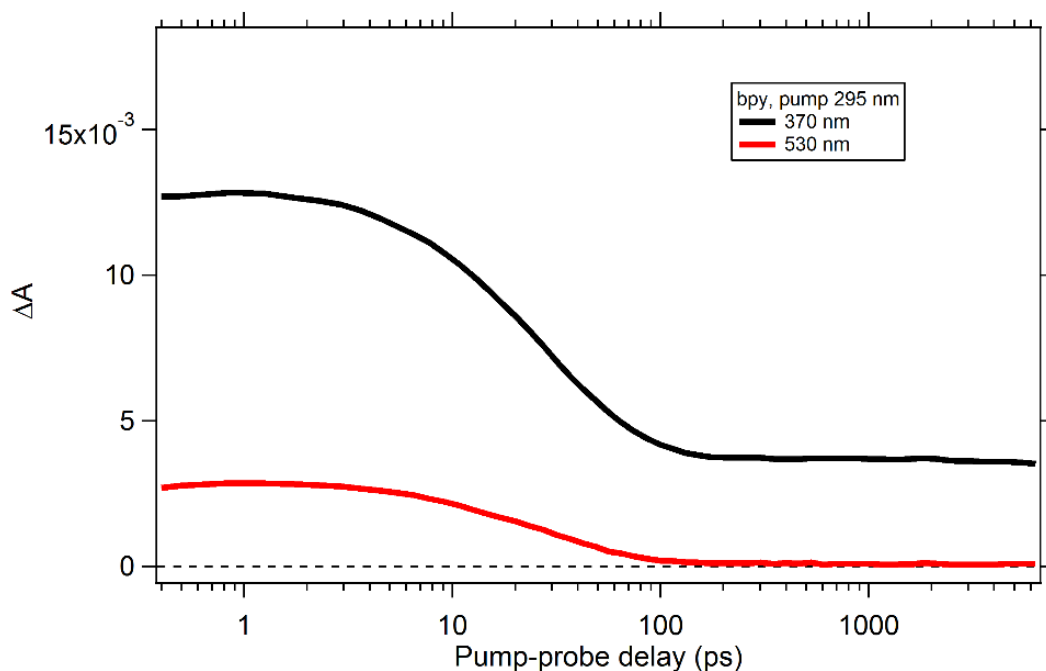

**Fig. S52.** Single wavelength kinetics for transient absorption spectra of 4,4'-di-*tert*-butyl-2,2'-bipyridine after photoexcitation at 305nm at select wavelengths (pump power = 10  $\mu$ W, 100 scans, CaF<sub>2</sub> probe, 1mm quartz cuvette).

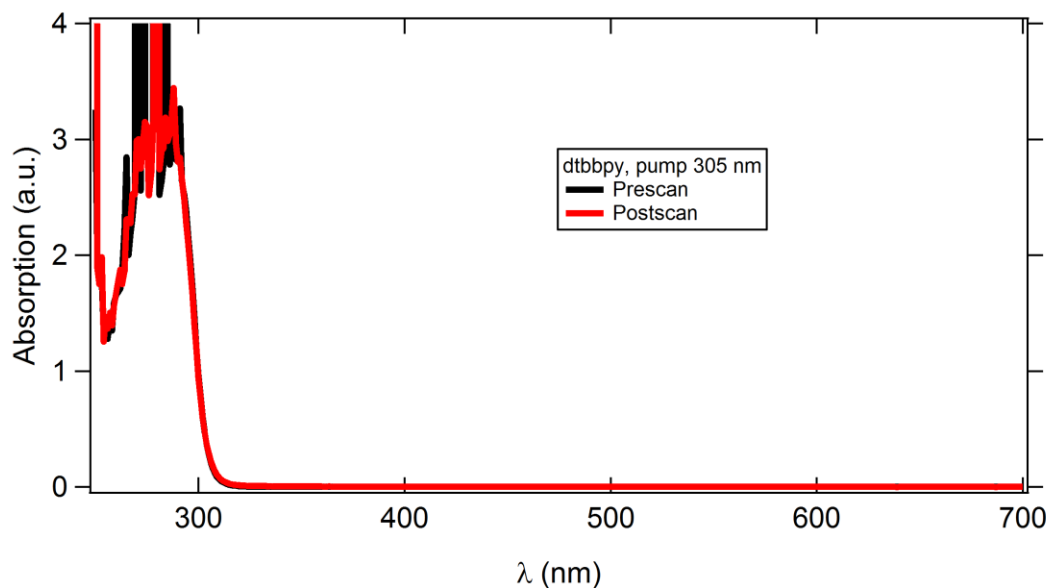

**Fig. S53.** Absorption spectra of 4,4'-di-*tert*-butyl-2,2'-bipyridine before and after transient absorption experiment (305 nm photoexcitation, pump power = 10  $\mu$ W, 100 scans, CaF<sub>2</sub> probe, 1mm quartz cuvette).

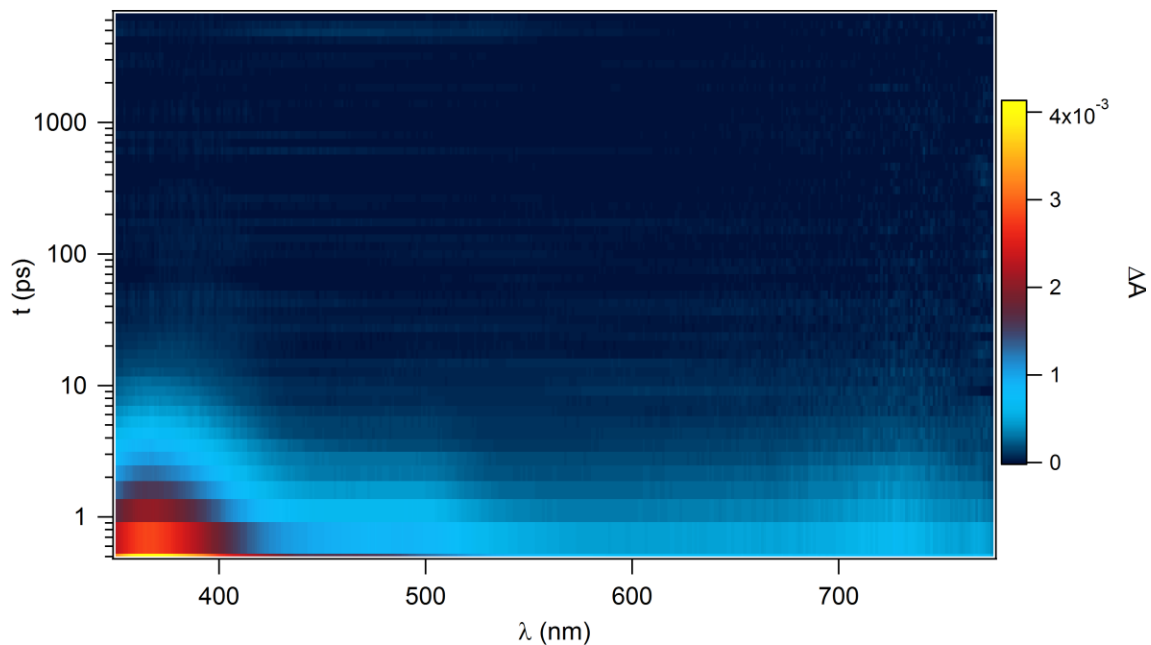

**Fig. S54.** Contour plot for transient absorption spectra of Ni(dtbbpy)Cl<sub>2</sub> (**2**) after photoexcitation at 295 nm (pump power = 20 μW, 50 scans, CaF<sub>2</sub> probe, 1mm quartz cuvette).

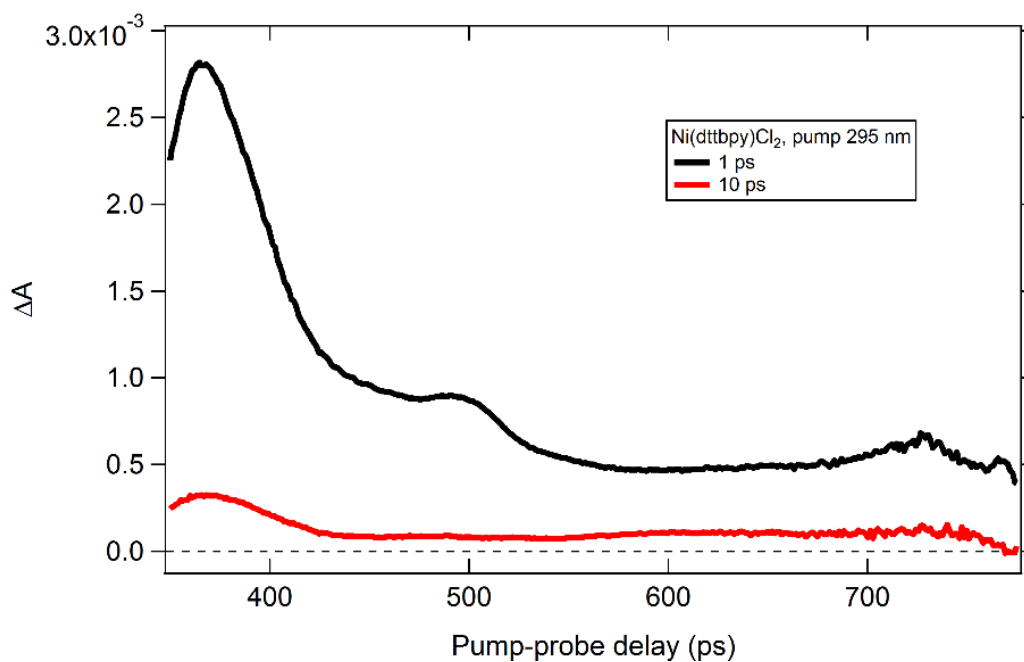

**Fig. S55.** Transient absorption spectra of Ni(dtbbpy)Cl<sub>2</sub> (**2**) after photoexcitation at 295 nm at select probe delays (pump power = 20 μW, 50 scans, CaF<sub>2</sub> probe, 1mm quartz cuvette).

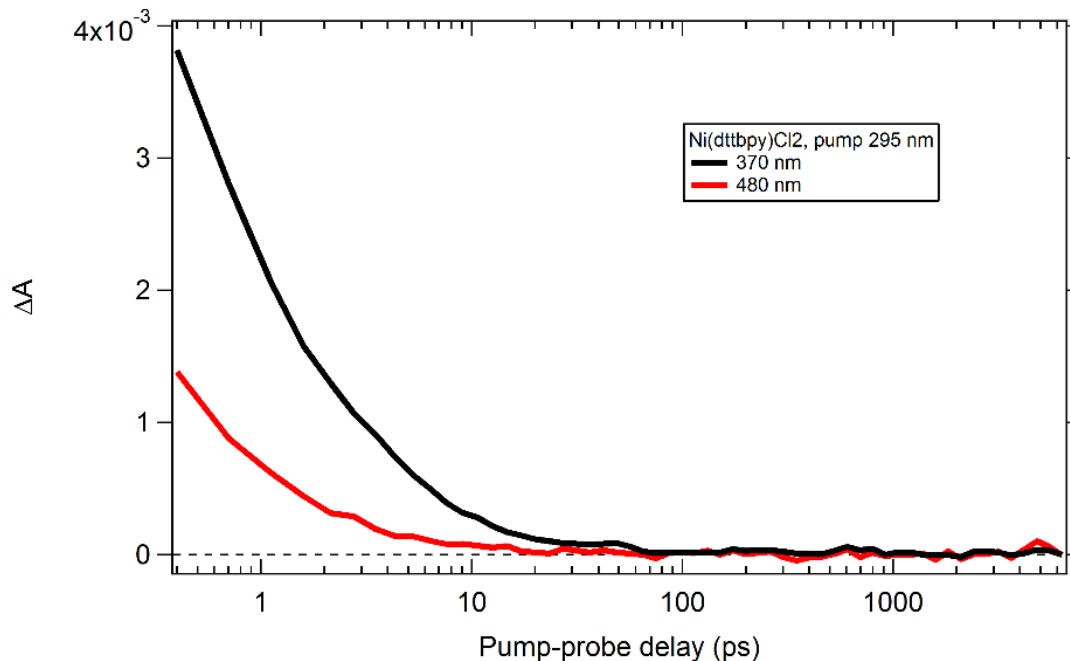

**Fig. S56.** Single wavelength kinetics for transient absorption spectra of Ni(dtbbpy)Cl<sub>2</sub> (**2**) after photoexcitation at 295 nm at select wavelengths (pump power = 20  $\mu$ W, 50 scans, CaF<sub>2</sub> probe, 1mm quartz cuvette).

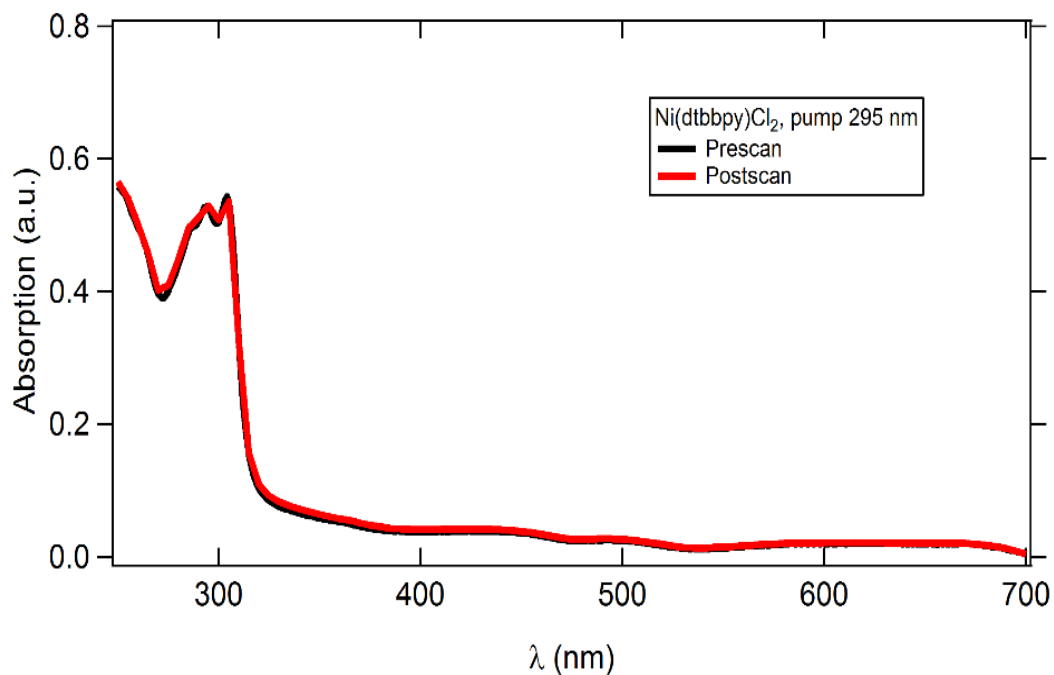

**Fig. S57.** Absorption spectra of Ni(dtbbpy)Cl<sub>2</sub> (**2**) before and after transient absorption experiment (295 nm photoexcitation, pump power = 20  $\mu$ W, 50 scans, CaF<sub>2</sub> probe, 1mm quartz cuvette).

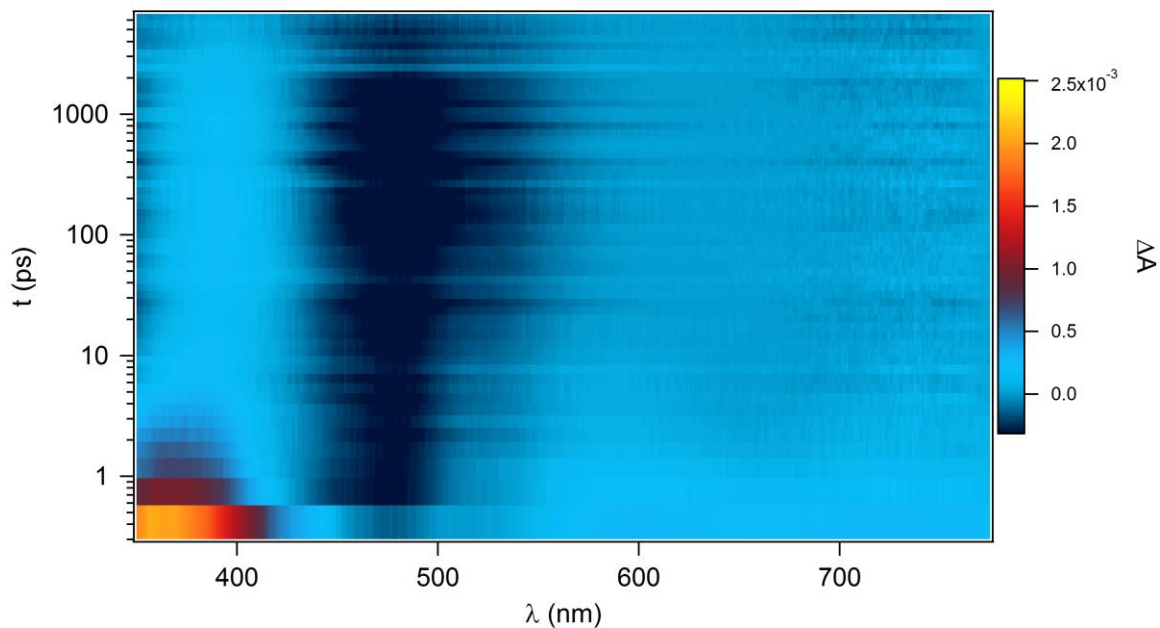

**Fig. S58.** Contour plot for transient absorption spectra of Ni(dtbbpy)(*o*-tolyl)Br (**1-Br**) after photoexcitation at 295 nm (pump power = 20  $\mu$ W, first 50 scans, CaF<sub>2</sub> probe, 1mm quartz cuvette).

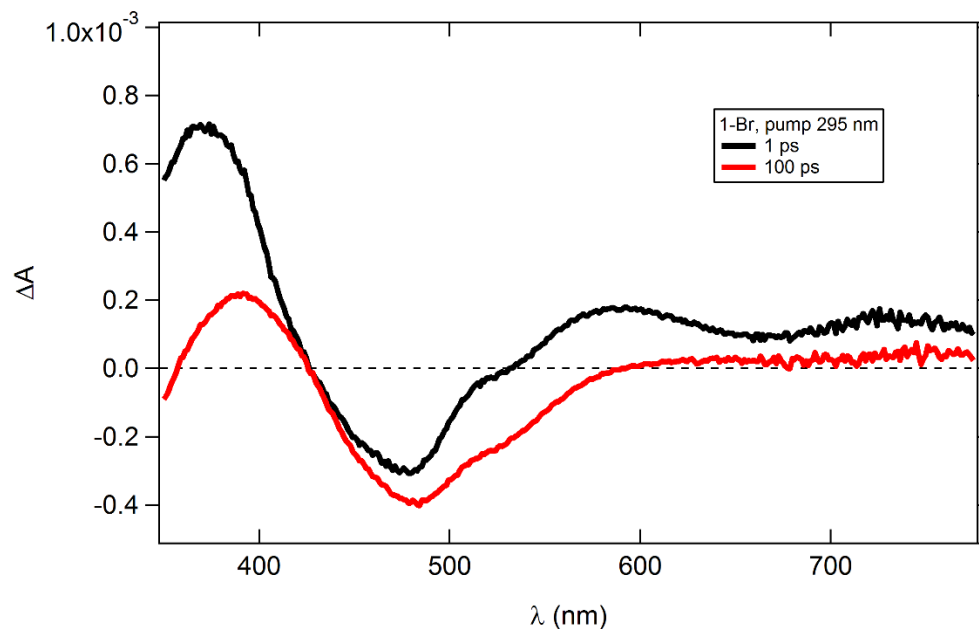

**Fig. S59.** Transient absorption spectra of Ni(dtbbpy)(*o*-tolyl)Br (**1-Br**) after photoexcitation at 295 nm at select probe delays (pump power = 20  $\mu$ W, first 50 scans, CaF<sub>2</sub> probe, 1mm quartz cuvette).

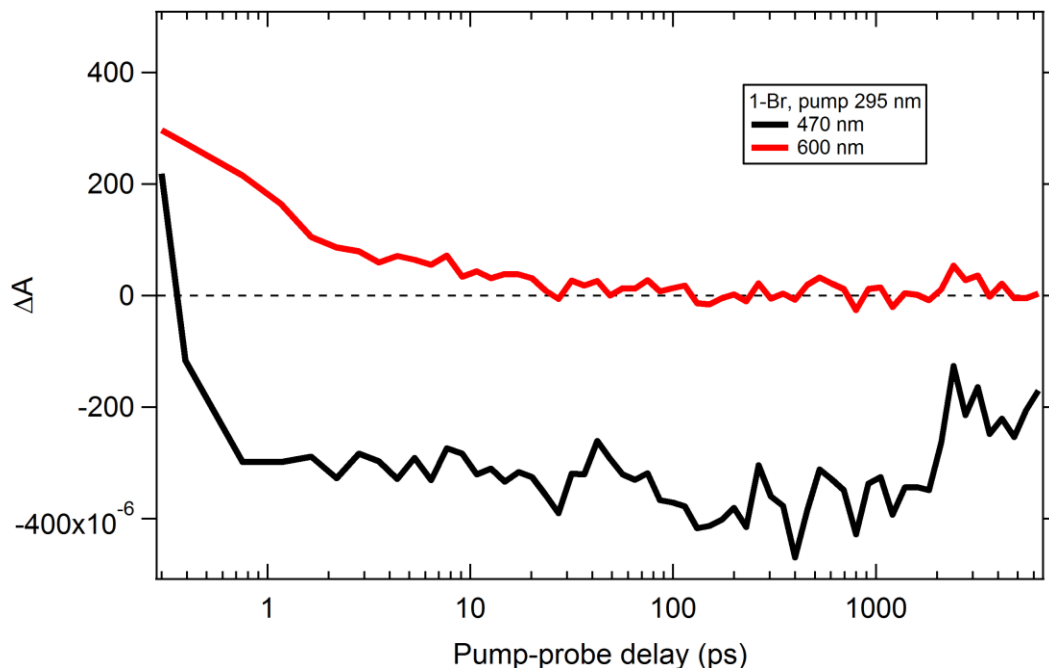

**Fig. S60.** Single wavelength kinetics for transient absorption spectra of Ni(dtbbpy)(*o*-tolyl)Br (**1-Br**) after photoexcitation at 295 nm at select wavelengths (pump power = 20  $\mu$ W, first 50 scans, CaF<sub>2</sub> probe, 1mm quartz cuvette).

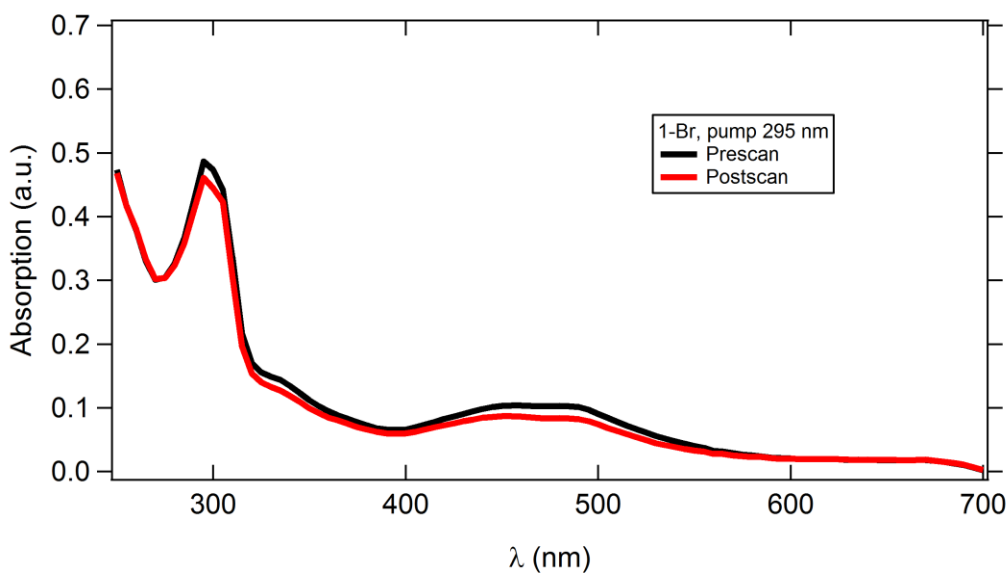

**Fig. S61.** Absorption spectra of Ni(dtbbpy)(*o*-tolyl)Br (**1-Br**) before and after transient absorption experiment (295 nm photoexcitation, pump power = 20  $\mu$ W, 233 total scans, CaF<sub>2</sub> probe, 1mm quartz cuvette).

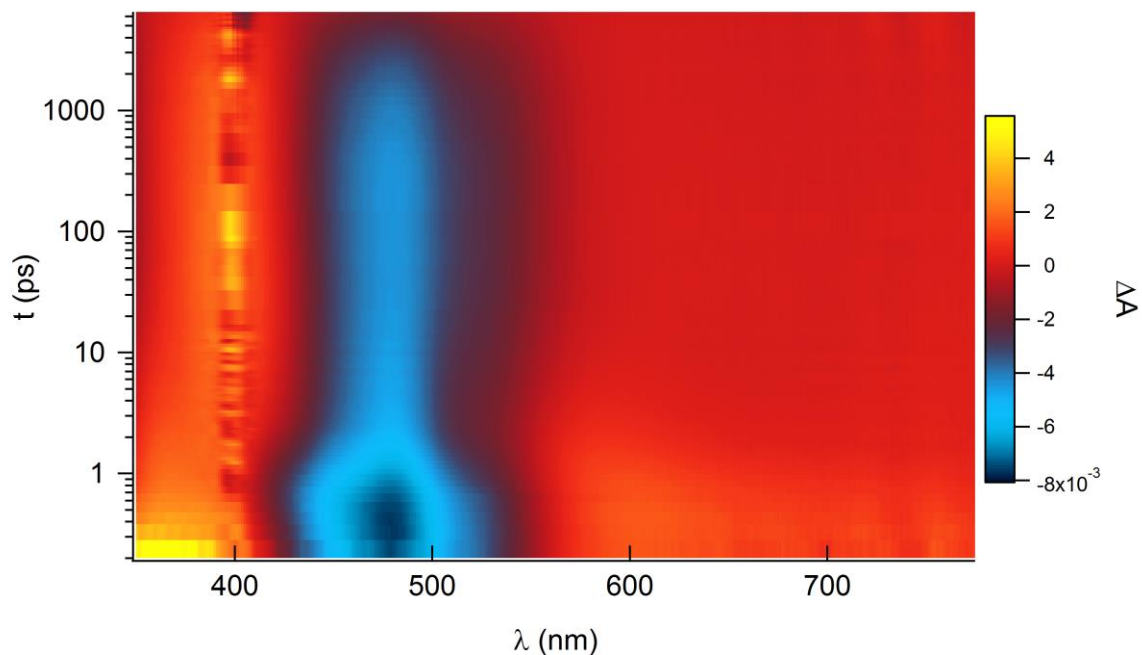

**Fig. S62.** Contour plot for transient absorption spectra of Ni(dtbbpy)(*o*-tolyl)Br (**1-Br**) after photoexcitation at 400 nm (pump power = 500  $\mu$ W, first 50 scans, CaF<sub>2</sub> probe, 2mm optical glass cuvette).

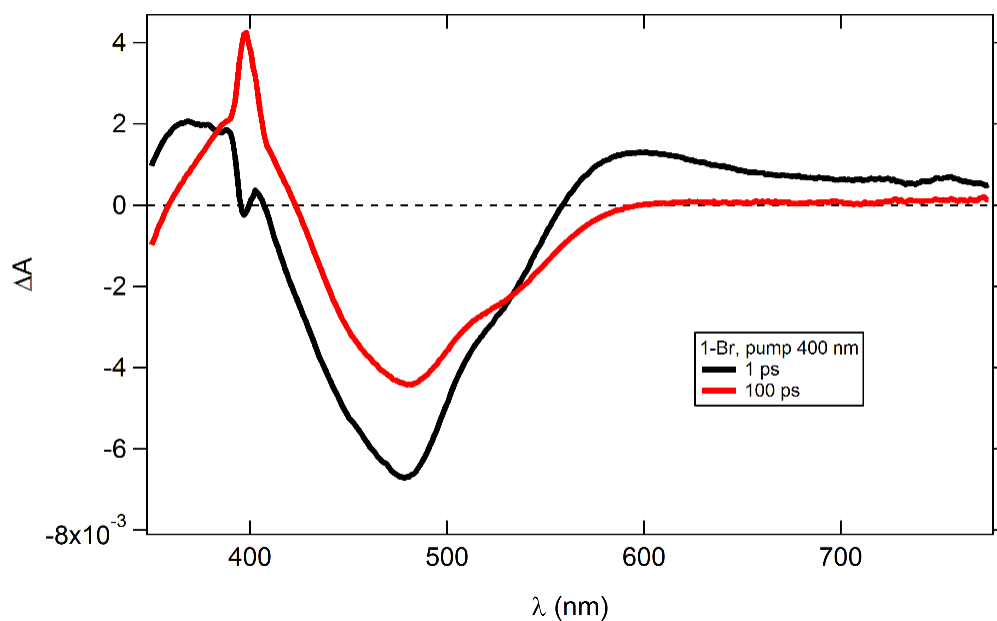

**Fig. S63.** Transient absorption spectra of Ni(dtbbpy)(*o*-tolyl)Br (**1-Br**) after photoexcitation at 400 nm at select probe delays (pump power = 500  $\mu$ W, first 50 scans, CaF<sub>2</sub> probe, 2 mm optical glass cuvette).



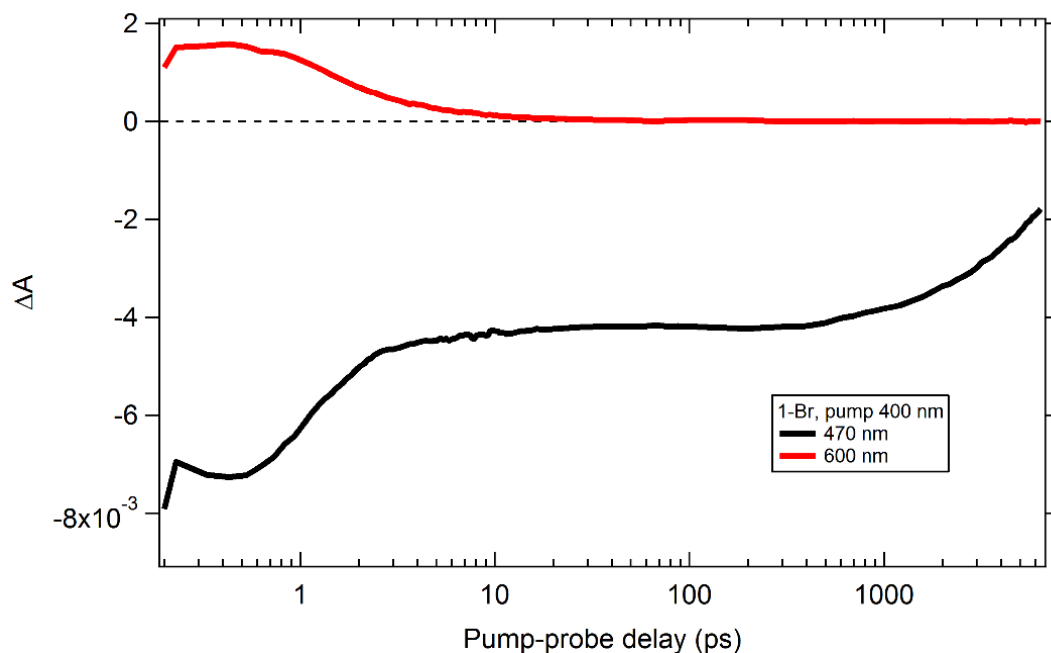

**Fig. S64.** Single wavelength kinetics for transient absorption spectra of Ni(dtbbpy)(*o*-tolyl)Br (**1-Br**) after photoexcitation at 400 nm at select wavelengths (pump power = 500  $\mu$ W, first 50 scans, CaF<sub>2</sub> probe, 2mm optical glass cuvette).

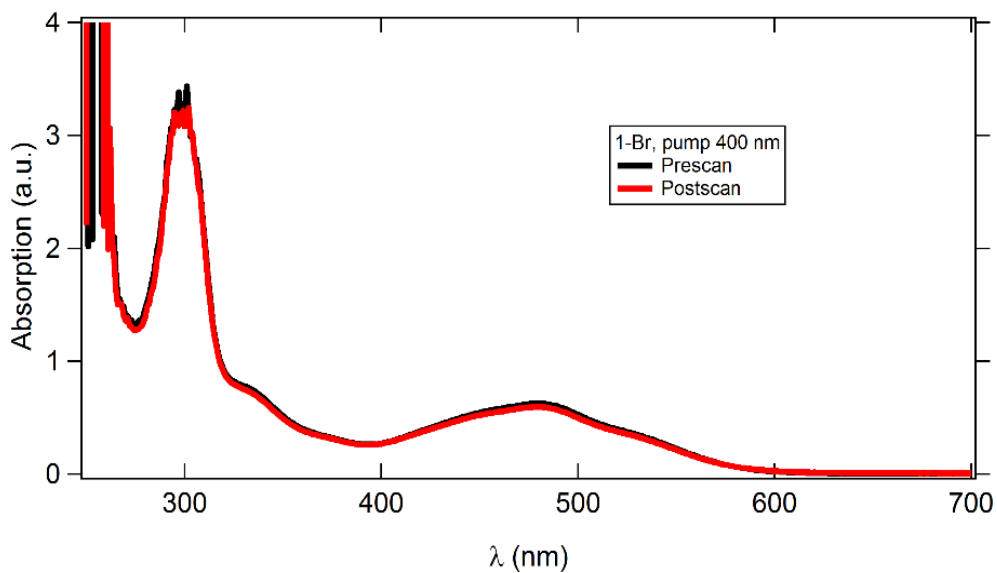

**Fig. S65.** Absorption spectra of Ni(dtbbpy)(*o*-tolyl)Br (**1-Br**) before and after transient absorption experiment (400 nm photoexcitation, pump power = 500  $\mu$ W, 78 total scans, CaF<sub>2</sub> probe, 2mm optical glass cuvette).

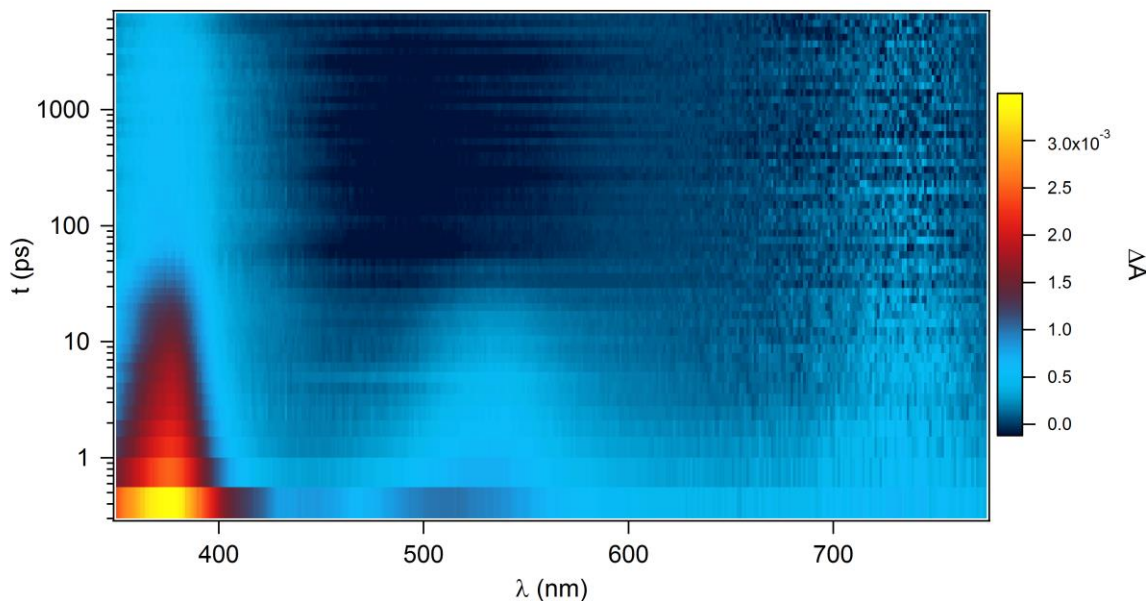

**Fig. S66.** Contour plot for transient absorption spectra of Ni(dtbbpy)(*o*-tolyl)I (**1-I**) after photoexcitation at 295 nm (pump power = 20  $\mu$ W, first 50 scans, CaF<sub>2</sub> probe, 1mm quartz cuvette).

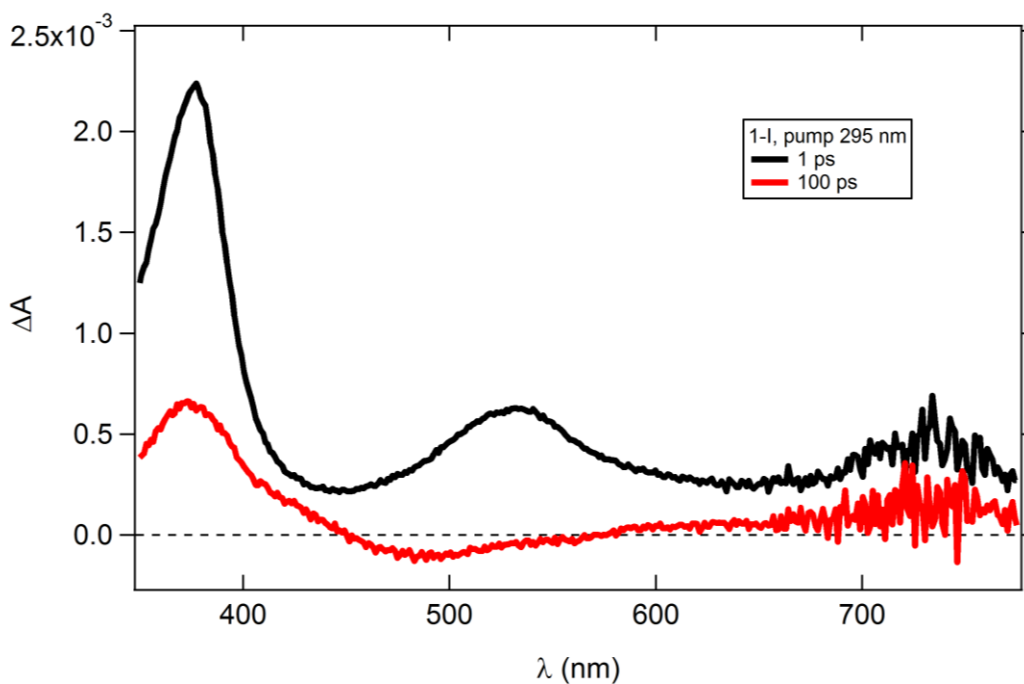

**Fig. S67.** Transient absorption spectra of Ni(dtbbpy)(*o*-tolyl)I (**1-I**) after photoexcitation at 295 nm at select probe delays (pump power = 20  $\mu$ W, first 50 scans, CaF<sub>2</sub> probe, 1mm quartz cuvette).

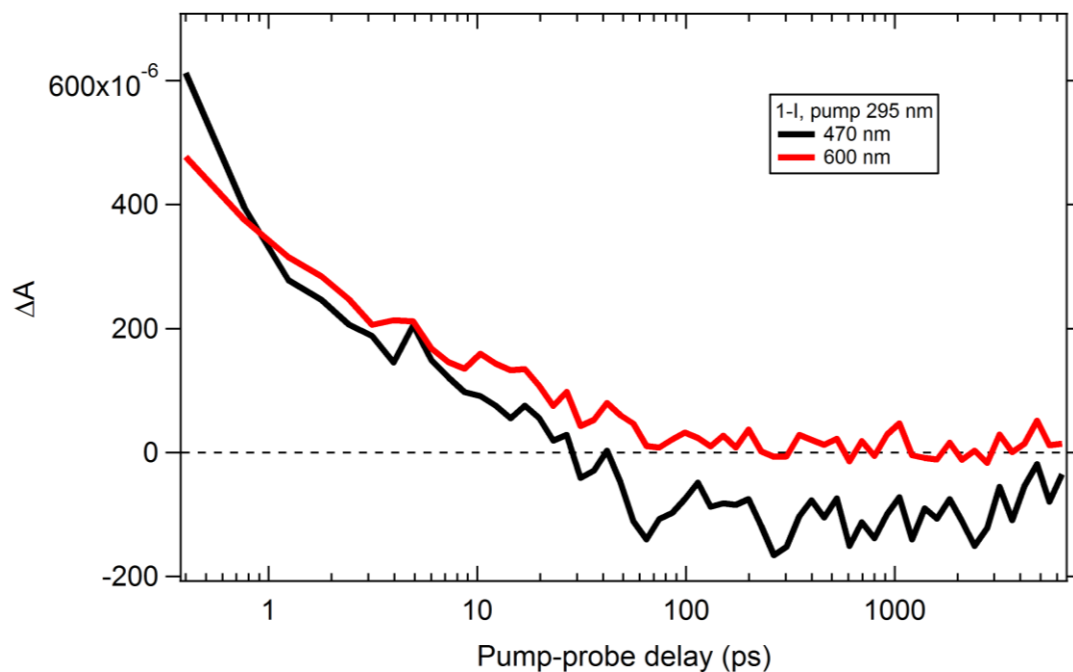

**Fig. S68.** Single wavelength kinetics for transient absorption spectra of Ni(dtbbpy)(*o*-tolyl)I (**1-I**) after photoexcitation at 295 nm at select wavelengths (pump power = 20  $\mu$ W, first 50 scans, CaF<sub>2</sub> probe, 1mm quartz cuvette).

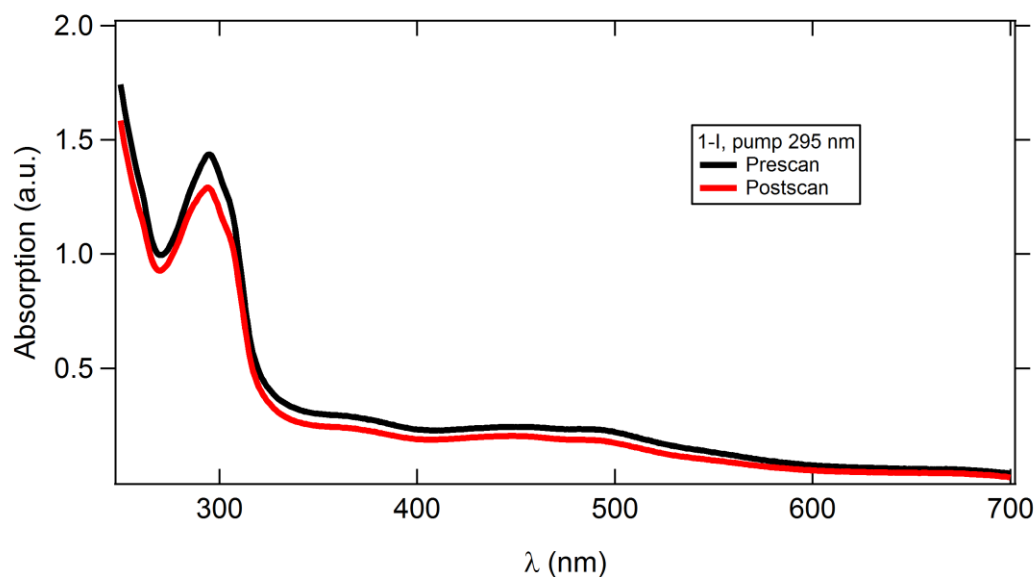

**Fig. S69.** Absorption spectra of Ni(dtbbpy)(*o*-tolyl)I (**1-I**) before and after transient absorption experiment (295 nm photoexcitation, pump power = 20  $\mu$ W, 298 total scans, CaF<sub>2</sub> probe, 1mm quartz cuvette).

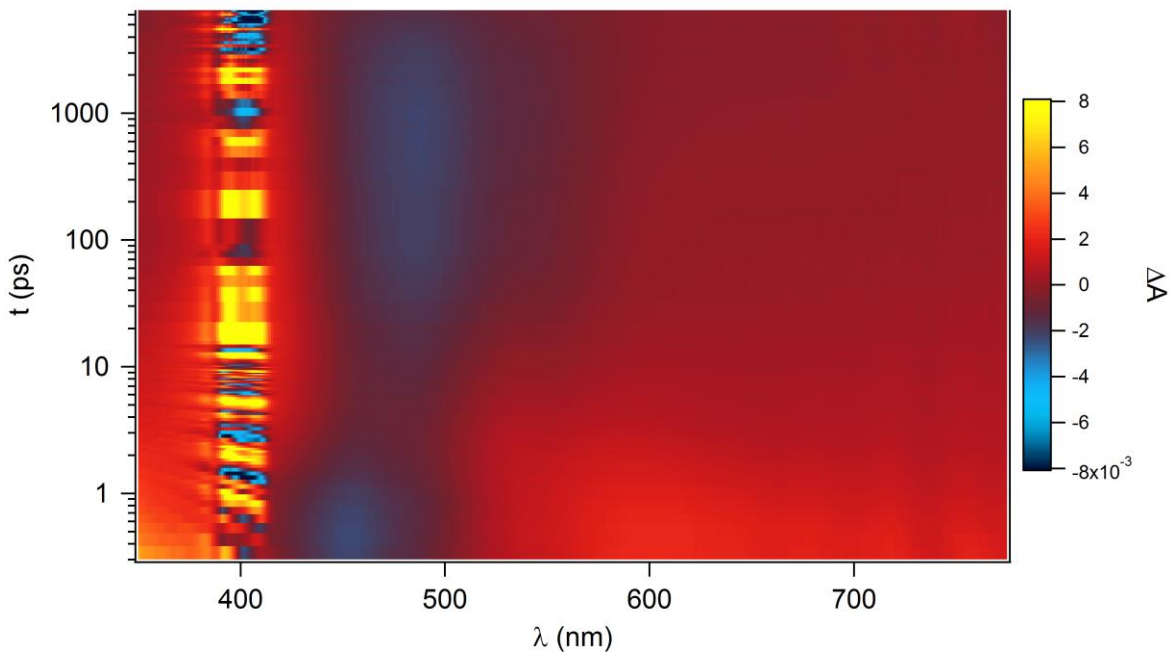

**Fig. S70.** Contour plot for transient absorption spectra of Ni(dtbbpy)(*o*-tolyl)I (**1-I**) after photoexcitation at 400 nm (pump power = 500  $\mu$ W, first 50 scans, CaF<sub>2</sub> probe, 2mm optical glass cuvette).

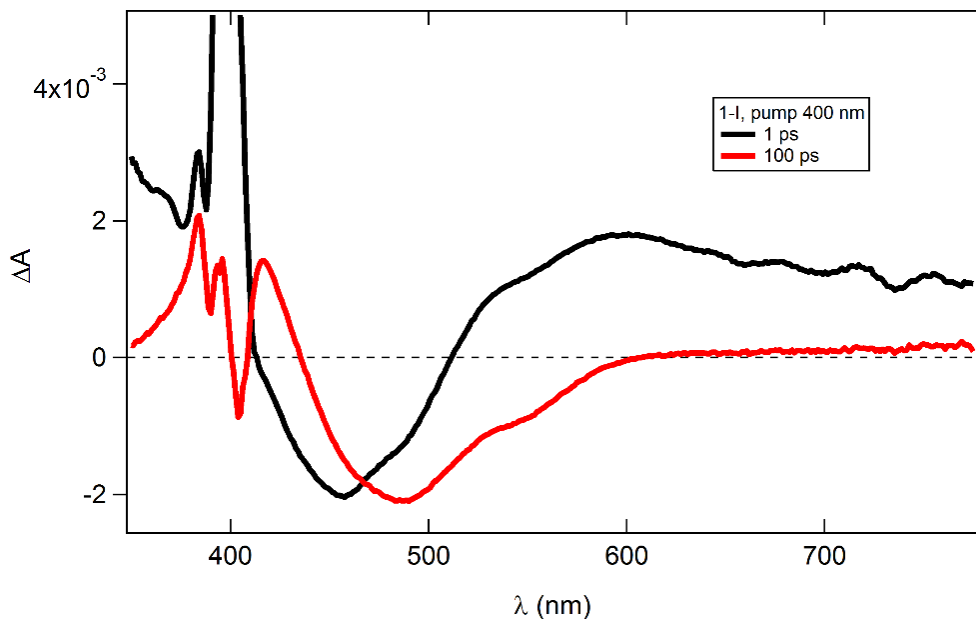

**Fig. S71.** Transient absorption spectra of Ni(dtbbpy)(*o*-tolyl)I (**1-I**) after photoexcitation at 400 nm at select probe delays (pump power = 500  $\mu$ W, first 50 scans, CaF<sub>2</sub> probe, 2mm optical glass cuvette).

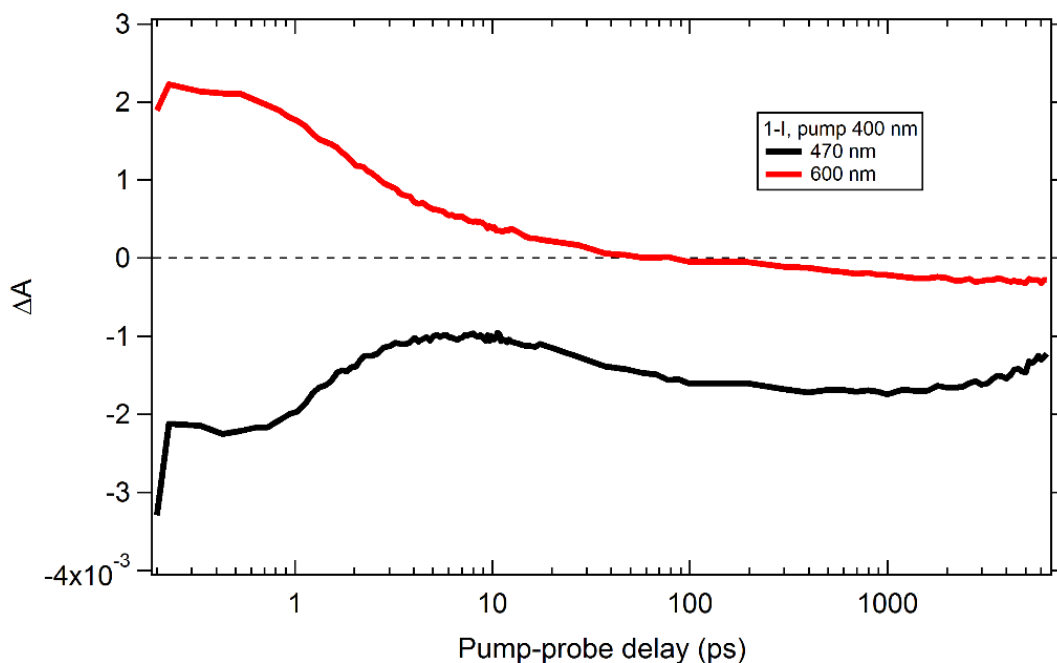

**Fig. S72.** Single wavelength kinetics for transient absorption spectra of Ni(dtbbpy)(*o*-tolyl)I (**1-I**) after photoexcitation at 400 nm at select wavelengths (pump power = 500  $\mu$ W, first 50 scans, CaF<sub>2</sub> probe, 2mm optical glass cuvette).

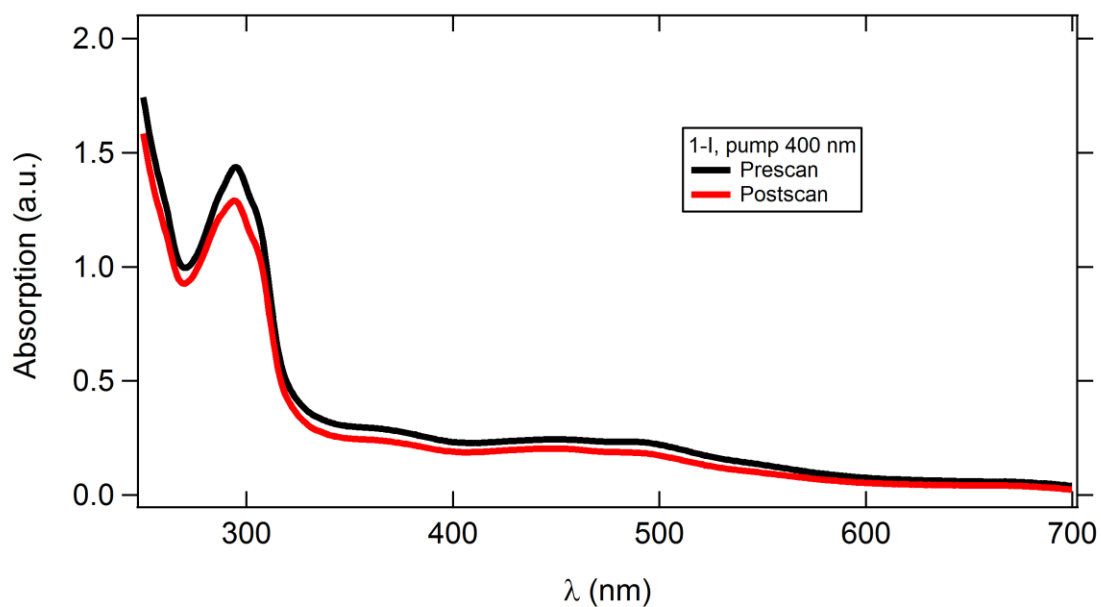

**Fig. S73.** Absorption spectra of Ni(dtbbpy)(*o*-tolyl)I (**1-I**) before and after transient absorption experiment (400 nm photoexcitation, pump power = 500  $\mu$ W, 280 total scans, CaF<sub>2</sub> probe, 2mm optical glass cuvette).

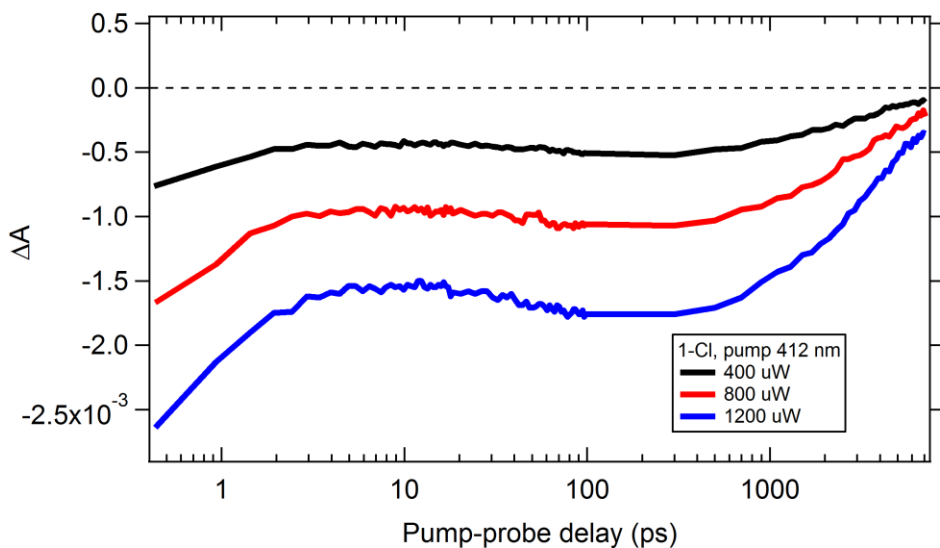

**Fig. S74.** Power dependence for Ni(dtbbpy)(*o*-tolyl)Cl (**1-Cl**). Single wavelength kinetics (460 nm) for transient absorption spectra of **1-Cl** after photoexcitation at 412 nm at select pump powers.

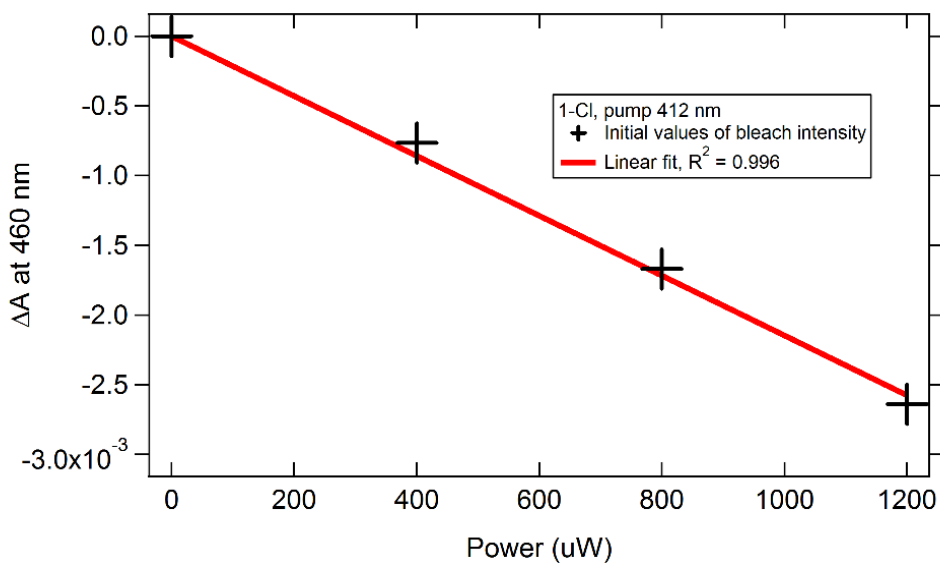

**Fig. S75.** Power dependence for Ni(dtbbpy)(*o*-tolyl)Cl (**1-Cl**). Initial values of bleach intensity (400 fs time delay) versus pump power plotted together with linear fit.

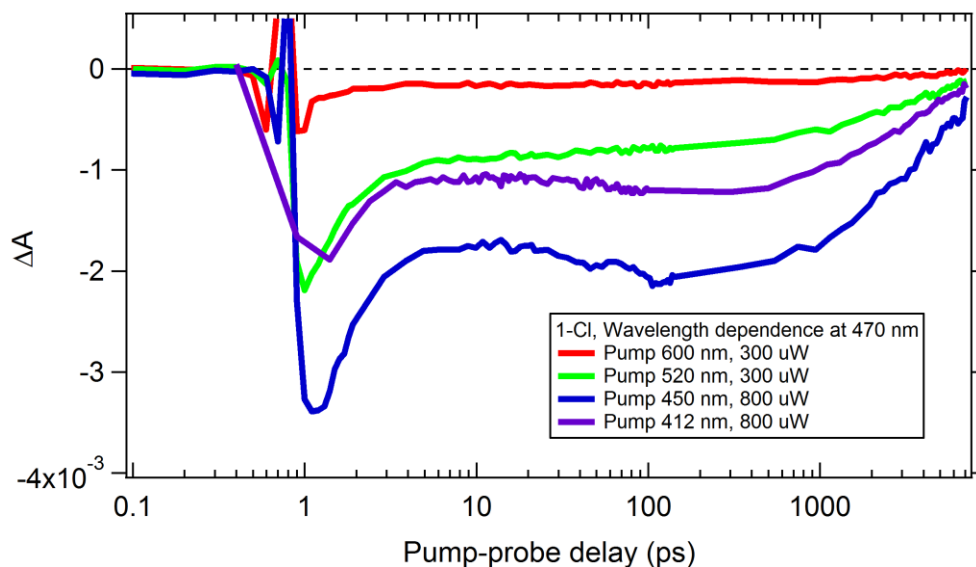

**Fig. S76.** Wavelength dependence for Ni(dtbbpy)(*o*-tolyl)Cl (**1-Cl**). Single wavelength kinetics (470 nm) for transient absorption spectra of **1-Cl** after photoexcitation at various wavelengths.

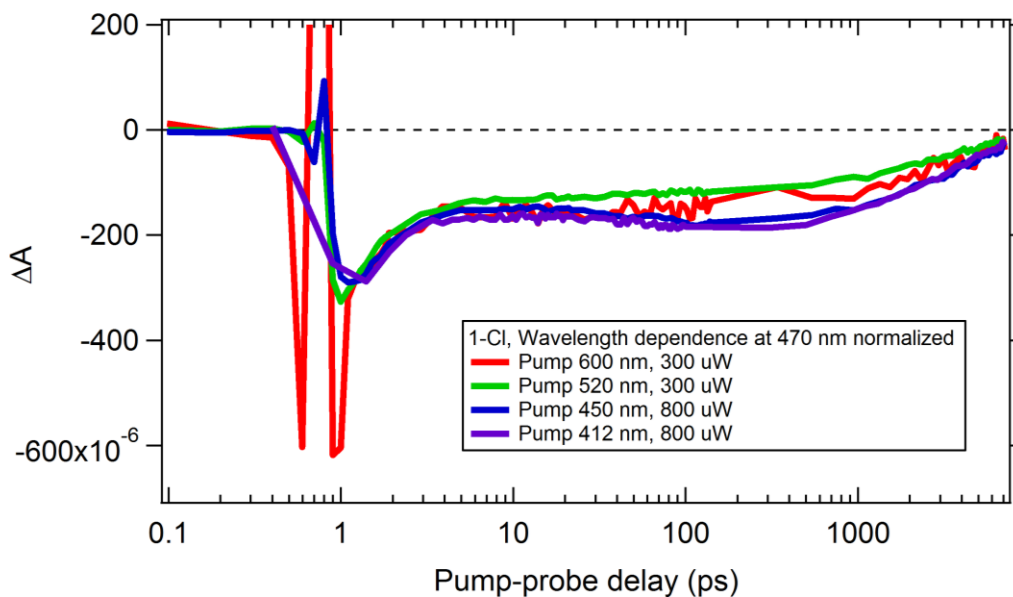

**Fig. S77.** Wavelength dependence for Ni(dtbbpy)(*o*-tolyl)Cl (**1-Cl**). Normalized single wavelength kinetics (470 nm) for transient absorption spectra of **1-Cl** after photoexcitation at various wavelengths.

## VI. Global Analysis

**Methods.** Global analysis was employed for kinetic modeling of transient absorption data to evaluate the proposed models and extract kinetic parameters. Global analysis was carried out using two software packages in this study: (1) the R-package *TIMP*<sup>40</sup> and graphical user interface *Glottaran*<sup>41</sup> and (2) a *Mathematica* package developed in house. The *Mathematica* package will be published open source upon completion; please don't hesitate to contact us regarding the preliminary code should you be interested in carrying out a similar analysis before that time. Note that this package is based on the same principles as other popular software such as *TIMP*, but carries out kinetic modeling using numerical solutions to systems ordinary differential equations (ODEs) and numerical minimization of fit residuals rather than using separable systems of linear ODEs with time dependent concentration solutions assumed to be the weighted sum of exponential decay functions (first order kinetics). The numerical minimization approach allows one to avoid the unimolecular assumptions of other methods. In this study the software was employed only to evaluate fitting error via bootstrap error analysis simulations and was critical to assessing the statistical significance of concentration dependent dynamics experiments. For the analysis of the full time course of transient absorption spectra global analysis was carried out using sequential models with unimolecular steps employing two, three, and four components.

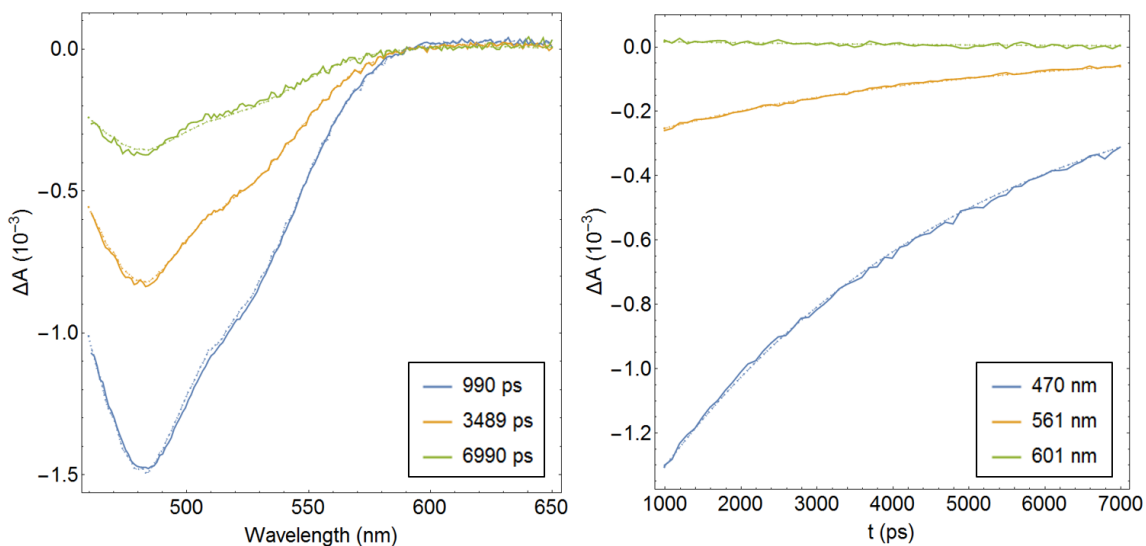

**Fig. S78.** Comparison of global analysis of late time dynamics using *Glottaran* and *Mathematica* packages (solid line = data, dashed line = *Glottaran*, dotted line = *Mathematica*). Select time slices (left) and single wavelength kinetics (right) for example data. Fit rate constants:  $k_{\text{Glottaran}} = 2.3892 \times 10^{-4} \text{ ps}^{-1}$ ,  $k_{\text{Mathematica}} = 2.3885 \times 10^{-4} \text{ ps}^{-1}$ .

The following section outlines the general algorithm for bootstrap error analysis used in concentration dependent kinetic experiments.



1. Global analysis of the experimental data is carried out and the residuals between fit and experimental data are calculated according to

$$Y = CA + R$$

where  $Y$  is the experimental data matrix,  $X = CA$  is the fit data matrix ( $C$  is the time dependent concentration profile matrix and  $A$  is the pure component spectra matrix) and  $R = \{R_1, R_2, \dots, R_t\}$  is the residuals matrix ( $R_t$  is a time vector residual, i.e. the residual spectrum at each time delay). Note that the software works by simply minimizing  $R$  with respect to the rate constants for specified steps in a mechanism, where the system of equations describing the mechanism is solved numerically on each iteration of the minimization.

2. A bootstrapped residual matrix  $\widehat{R}^* = \{\widehat{R}_1^*, \widehat{R}_2^*, \dots, \widehat{R}_t^*\}$ , for fixed regressor bootstrap analysis, is generated by randomly sampling the time vector residuals ( $R_t$ ) with replacement.
3. Next, the bootstrapped residual matrix ( $\widehat{R}^*$ ) is added to the fit data matrix ( $X$ )

$$\widehat{Y} = X + \widehat{R}^*$$

and the resulting bootstrapped data set ( $\widehat{Y}$ ) is fit using global analysis to give a set of bootstrapped rate constants. This process is repeated  $N$  times, each time generating a new bootstrapped residual matrix and tabulating the resulting rate constants. In the limit, the rate constant distribution calculated in this way gives the probability of a given rate constant. Accordingly, one can empirically check for convergence of the bootstrap algorithm by plotting bootstrap standard error as a function of the number of iterations. For this work,  $N = 500$  was found to be sufficient (figure S79).

4. Finally, the resulting set of bootstrapped rate constants can be treated as analogous to the true probability distribution for statistical inference. The bootstrap standard error can be calculated via the standard deviation of the set of bootstrapped rate constants. The standard error can then be Studentized to give confidence intervals for kinetic parameters.

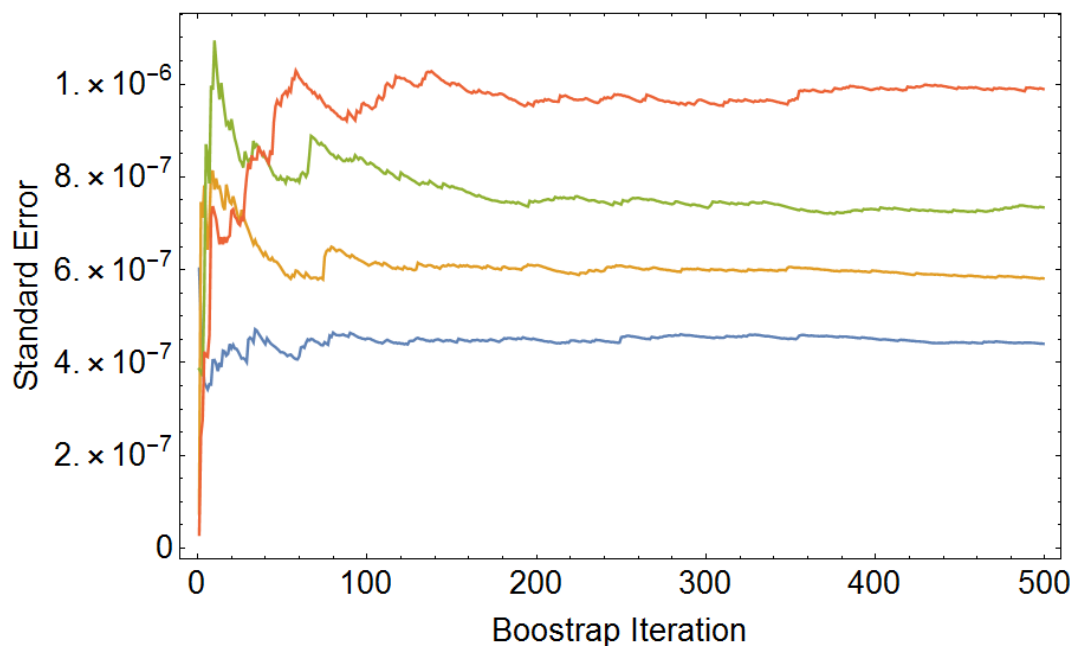

**Fig. S79.** Convergence of bootstrap standard error. The above data was generated via global analysis of the long time constant (fit after 1 ns delay) from concentration dependence experiments. Standard error: blue ([Ni] = 0.63 mM, 237 scans), yellow ([Ni] = 1.31 mM, 113 scans), green ([Ni] = 1.98 mM, 189 scans), red ([Ni] = 2.66 mM, 587 scans).

**Global Analysis Summary.** Computational studies suggest that photoexcitation of complexes **1-Cl**, **-Br**, **-I** with 295 nm and 400 nm laser pulses initially generate  $^1\pi-\pi^*$  and  $^1\text{MLCT}$  upper excited states respectively. Therefore, it was assumed that the transient absorption spectra from these experiments evolved from  $^1\pi-\pi^*_\text{N}$  and  $^1\text{MLCT}_\text{N}$  states. For data collected with 295 nm photoexcitation the initial transient signal, which we ascribe to  $^1\pi-\pi^*_\text{N}$  upper excited states, is coevolved with the instrument response but clearly present in the first picosecond. For data collected with 400 nm photoexcitation, cooling of the initial transient signal, which we assign to  $^1\text{MLCT}_\text{N}$  upper excited states, is resolved as shown in figure 4B of the manuscript. However, for these data the presence of scattering at 400 nm complicates global analysis. Accordingly, during our modeling studies the spectra were truncated to 420 nm and as a result the initial decay is not captured in global analysis.

In transient spectra for **1-Cl**, **-Br**, **-I** there is an observable bleach broadening which accompanies cooling of the blue ESA feature (figure 4D). We ascribe this feature to formation of an excimer on the basis of concentration dependence and modeling studies. Given that this step is not unimolecular, global analysis can be viewed as a fitting tool for deconvoluting excimer formation. The “rate constants” reported for this step, should not be taken as the true rate of bimolecular excimer formation. In this section simple models without concentration dependent excimer formation or electron transfer reactions (Section IX) were chosen to capture the overall unimolecular excited state dynamics of the complexes.

With these considerations in mind we have selected sequential models that best fit each set of experimental data, though the fitting results for two, three, and four component models are tabulated for completeness. For 295 nm photoexcitation the complexes a four-component model (scheme 1) in which the first, second, and fourth components represent unimolecular decays while the third component captures the bleach broadening associated with excimer formation were expected to best fit the data.

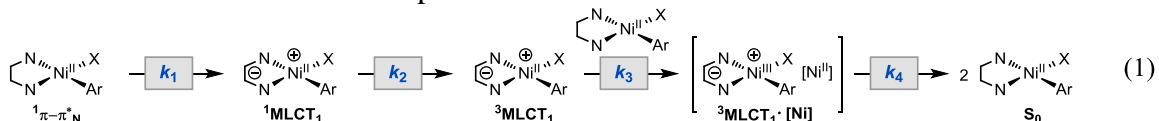

However, a simpler three-component model, without excimer formation, was ultimately employed (scheme 2).

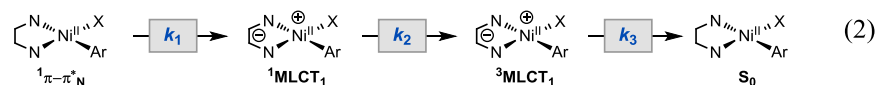

In this case, the temporal resolution and data quality of the experiment was not sufficient to capture bleach broadening with global analysis. For 400 nm photoexcitation of **1-Cl**, **-Br**, and **-I** a three-component model (scheme 3)

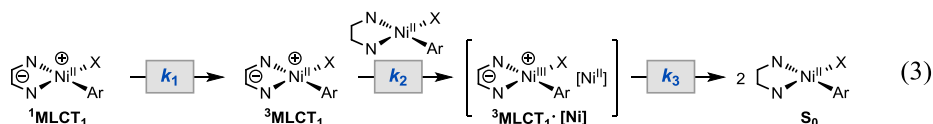

represented that data well. For this model, the second component captures excimer formation. Some additional evidence for this assignment can be seen in the contour plot (figure S115) and single wavelength kinetics (figure S117) of the transient absorption

spectra of **1-I** after 400 nm photoexcitation. The amplitude of the negative signal doubles on the tens to hundreds of picoseconds timescale.

Table S10 and S11 summarize the final global analysis results. For each complex the late time dynamics are similar, with lifetimes on the order of 10 ns. Table S12, S13, and S14 summarize the two-, three-, and four-component fitting results. The errors reported here are those calculated by *Glotaran*. The bootstrap approach presented above was developed for concentration dependence experiments because it is not clear how these errors were calculated. For each fit the following section contains contour plot for the data used in global analysis, evolution associated spectra, concentration profiles for each component and a comparison of experimental and fit difference absorption and single wavelength kinetics.

Proposed deexcitation kinetics. Comments on figure 4A. We did not include ligand-field states in the Jablonski diagram based on the following considerations: (i) the allowed transitions of largest oscillator strength in the visible (Table S1, ES18) and UV (Table S2, ES61) were assigned as MLCT and  $\pi-\pi^*$  respectively based on changes in atomic charge (Table S9), difference density isosurfaces (Figure S28), and orbital contributions (Table S29). (ii) The lowest energy excited state, identified by comparing the spectrum for the long-lived component in pump-probe with the computed difference absorption spectrum for  $T_1$ , was assigned to  ${}^3MLCT_1$  by DFT, TD-DFT, and NPA analysis. In addition, the optimized  $T_1$  electronic structure has unpaired spin density localized in a dtbbpy  $\pi^*$  Kohn-Sham orbital (Fig. S15, orbital  $\alpha_{121}$ ) and a Ni/aryl/Cl centered Kohn-Sham orbital (Fig. S15, orbital  $\alpha_{120}$ ) consistent with this assignment. (iii) Excluding exciplex formation, analysis of pump-probe data for visible excitation suggested a three-component sequential model, giving one unassigned observable state. The required initial excitation to a singlet state (singlet ground state) and  ${}^3MLCT_1$  terminal assignment suggest this intermediate state could be a singlet which *we assigned to be  $S_1$  under the assumption that ISC occurs from the lowest excited singlet state.* Computations predict that  $S_1$  (Table S1, ES7) has significant positive charge buildup on Ni (Table S9) and is well described as a HOMO-LUMO transition and thus  ${}^1MLCT_1$ . Many states do have some computed 3d contributions and states with larger 3d character are likely along the path to deexcitation *before*  ${}^3MLCT_1$ , given the computed density of states. For example,  $S_2$  (Table S1, ES8) has significant ligand field character based on transition orbital contributions (Table S29). Additionally, in the case of hot ISC mentioned in the text, the intermediate species could be an upper triplet state with some LF character. However, based on the above considerations the excited states observed spectroscopically are best described according to Figure 4A. Accordingly, we believe that *ligand-field states are not involved in the deactivation of  ${}^3MLCT_1$  Ni*, rather deexcitation to the ground state likely involves other nonradiative processes such as spin interconversion.

**Table S10.** Summary of global analysis results for complexes **1-Cl**, **-Br**, **-I** (295 nm photoexcitation) with selected three-component model. The rate and time constants correspond to the models presented on the previous page.

| Complex | Pump   | Model | $k_1$ (ps <sup>-1</sup> ) | $\tau_1$ (ps) | $k_2$ (ps <sup>-1</sup> ) | $\tau_2$ (ps) | $k_3$ (ps <sup>-1</sup> ) | $\tau_3$ (ns) |
|---------|--------|-------|---------------------------|---------------|---------------------------|---------------|---------------------------|---------------|
| 1-Cl    | 295 nm | 2     | 2.7                       | 0.37          | $9.6 \times 10^{-2}$      | 10.4          | $1.4 \times 10^{-4}$      | 7.1           |
| 1-Br    | 295 nm | 2     | 2.8                       | 0.36          | 0.43                      | 2.3           | $1.1 \times 10^{-4}$      | 9.0           |
| 1-I     | 295 nm | 2     | 4.3                       | 0.23          | $5.2 \times 10^{-2}$      | 19.2          | $7.7 \times 10^{-5}$      | 13.1          |

**Table S11.** Summary of global analysis results for complexes **1-Cl**, **-Br**, **-I** (400 nm photoexcitation) with selected three-component model. The rate and time constants correspond to the models presented on the previous page.

| Complex | Pump   | Model | $k_1$ (ps <sup>-1</sup> ) | $\tau_1$ (ps) | $k_2$ (ps <sup>-1</sup> ) | $\tau_2$ (ps) | $k_3$ (ps <sup>-1</sup> ) | $\tau_3$ (ns) |
|---------|--------|-------|---------------------------|---------------|---------------------------|---------------|---------------------------|---------------|
| 1-Cl    | 400 nm | 3     | 0.95                      | 1.05          | 0.15                      | 6.6           | $2.4 \times 10^{-4}$      | 4.1           |
| 1-Br    | 400 nm | 3     | 0.75                      | 1.34          | 0.17                      | 6.0           | $1.3 \times 10^{-4}$      | 7.8           |
| 1-I     | 400 nm | 3     | 0.49                      | 2.04          | $3.1 \times 10^{-2}$      | 32.2          | $4.8 \times 10^{-5}$      | 20.8          |

**Table S12.** Summary of global analysis results for fitting with a two-component sequential model.

| Complex | Pump   | Two Component Model       |                      |                           |                      |
|---------|--------|---------------------------|----------------------|---------------------------|----------------------|
|         |        | $k_1$ (ps <sup>-1</sup> ) | Error                | $k_2$ (ps <sup>-1</sup> ) | Error                |
| 1-Cl    | 295 nm | 2.3                       | $7.2 \times 10^{-3}$ | $5.5 \times 10^{-4}$      | $1.2 \times 10^{-5}$ |
| 1-Cl    | 400 nm | 0.86                      | $4.1 \times 10^{-3}$ | $2.3 \times 10^{-4}$      | $7.2 \times 10^{-7}$ |
| 1-Br    | 295 nm | 2.6                       | $9.3 \times 10^{-3}$ | $1.3 \times 10^{-4}$      | $4.5 \times 10^{-6}$ |
| 1-Br    | 400 nm | 0.72                      | $3.4 \times 10^{-3}$ | $1.1 \times 10^{-4}$      | $4.1 \times 10^{-7}$ |
| 1-I     | 295 nm | 3.2                       | $2.0 \times 10^{-2}$ | $1.6 \times 10^{-3}$      | $2.9 \times 10^{-5}$ |
| 1-I     | 400 nm | 0.11                      | $7.1 \times 10^{-4}$ | $5.5 \times 10^{-6}$      | $1.2 \times 10^{-6}$ |

**Table S13.** Summary of global analysis results for fitting with a three-component sequential model.

| Complex | Pump   | Three Component Model     |                      |                           |                      |                           |                      |
|---------|--------|---------------------------|----------------------|---------------------------|----------------------|---------------------------|----------------------|
|         |        | $k_1$ (ps <sup>-1</sup> ) | Error                | $k_2$ (ps <sup>-1</sup> ) | Error                | $k_3$ (ps <sup>-1</sup> ) | Error                |
| 1-Cl    | 295 nm | 2.7                       | $5.9 \times 10^{-4}$ | $9.6 \times 10^{-2}$      | $9.1 \times 10^{-4}$ | $1.4 \times 10^{-4}$      | $3.3 \times 10^{-6}$ |
| 1-Cl    | 400 nm | 0.95                      | $3.0 \times 10^{-3}$ | 0.15                      | $9.3 \times 10^{-4}$ | $2.4 \times 10^{-4}$      | $3.6 \times 10^{-7}$ |
| 1-Br    | 295 nm | 2.8                       | $1.5 \times 10^{-2}$ | 0.43                      | $8.5 \times 10^{-3}$ | $1.1 \times 10^{-4}$      | $4.4 \times 10^{-6}$ |
| 1-Br    | 400 nm | 0.75                      | $3.3 \times 10^{-3}$ | 0.17                      | $1.3 \times 10^{-3}$ | $1.3 \times 10^{-4}$      | $2.4 \times 10^{-7}$ |
| 1-I     | 295 nm | 4.3                       | $1.4 \times 10^{-2}$ | $5.2 \times 10^{-2}$      | $3.4 \times 10^{-4}$ | $7.7 \times 10^{-5}$      | $1.9 \times 10^{-6}$ |
| 1-I     | 400 nm | 0.49                      | $2.0 \times 10^{-3}$ | $3.1 \times 10^{-2}$      | $2.0 \times 10^{-4}$ | $4.8 \times 10^{-5}$      | $4.3 \times 10^{-7}$ |

**Table S14.** Summary of global analysis results for fitting with a four-component sequential model.

| Complex | Pump   | Four Component Model      |                      |                           |                      |                           |                      |                           |                      |
|---------|--------|---------------------------|----------------------|---------------------------|----------------------|---------------------------|----------------------|---------------------------|----------------------|
|         |        | $k_1$ (ps <sup>-1</sup> ) | Error                | $k_2$ (ps <sup>-1</sup> ) | Error                | $k_3$ (ps <sup>-1</sup> ) | Error                | $k_4$ (ps <sup>-1</sup> ) | Error                |
| 1-Cl    | 295 nm | 2.7                       | $5.9 \times 10^{-3}$ | $8.4 \times 10^{-4}$      | $2.6 \times 10^{-5}$ | $9.4 \times 10^{-2}$      | $1.2 \times 10^{-3}$ | $8.0 \times 10^{-5}$      | $7.1 \times 10^{-6}$ |
| 1-Cl    | 400 nm | 0.82                      | $3.2 \times 10^{-2}$ | 0.8                       | $3.7 \times 10^{-3}$ | $7.2 \times 10^{-2}$      | $1.2 \times 10^{-3}$ | $2.4 \times 10^{-4}$      | $3.3 \times 10^{-7}$ |
| 1-Br    | 295 nm | 2.1                       | 0.65                 | 2.1                       | 0.64                 | $1.3 \times 10^{-2}$      | $4.5 \times 10^{-4}$ | $1.6 \times 10^{-4}$      | $5.1 \times 10^{-6}$ |
| 1-Br    | 400 nm | 0.64                      | $2.5 \times 10^{-2}$ | 0.65                      | $2.8 \times 10^{-2}$ | $2.6 \times 10^{-2}$      | $5.5 \times 10^{-4}$ | $1.3 \times 10^{-4}$      | $2.4 \times 10^{-7}$ |
| 1-I     | 295 nm | 5.8                       | $4.6 \times 10^{-2}$ | 1.3                       | $2.0 \times 10^{-2}$ | $3.9 \times 10^{-2}$      | $2.9 \times 10^{-4}$ | $6.8 \times 10^{-5}$      | $1.5 \times 10^{-6}$ |
| 1-I     | 400 nm | 0.53                      | $1.6 \times 10^{-3}$ | $6.8 \times 10^{-2}$      | $3.0 \times 10^{-4}$ | $1.4 \times 10^{-3}$      | $1.6 \times 10^{-5}$ | $7.7 \times 10^{-5}$      | $5.1 \times 10^{-7}$ |

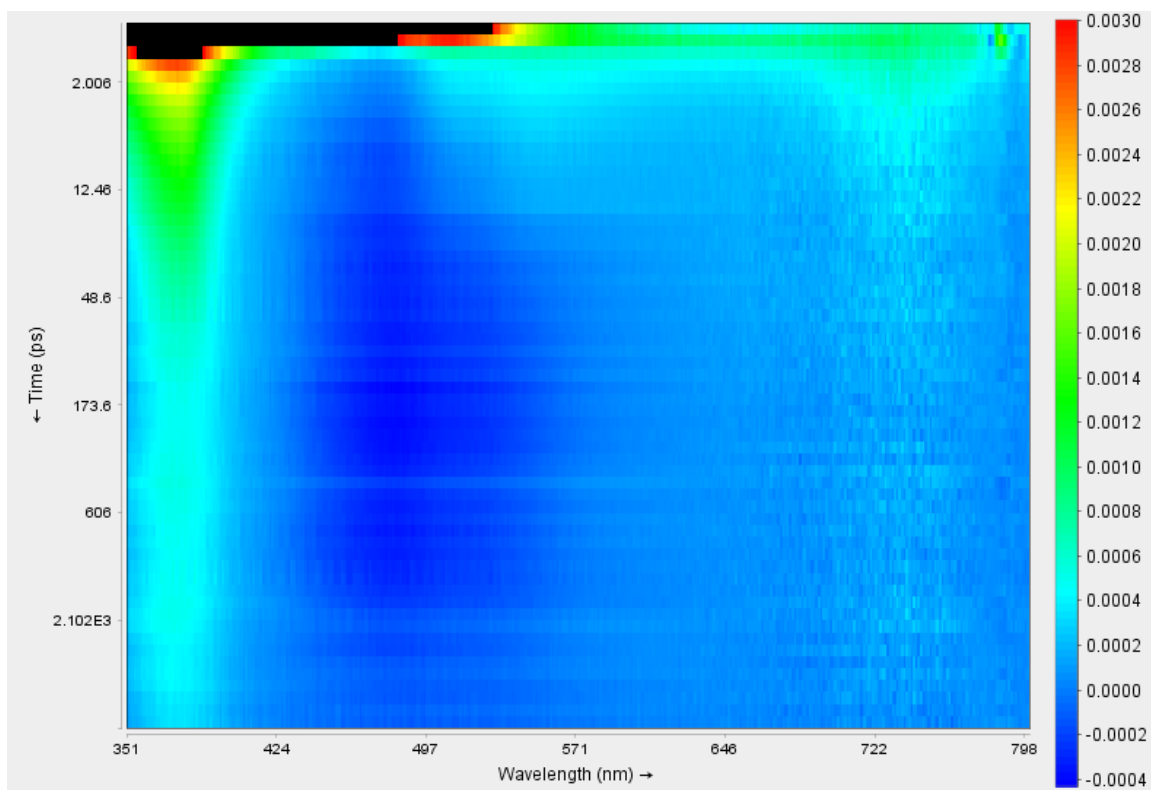

**Fig. S80.** Contour plot for portion of Ni(dtbbpy)(*o*-tolyl)Cl (**1-Cl**) transient absorption data used for global analysis (295 nm photoexcitation).

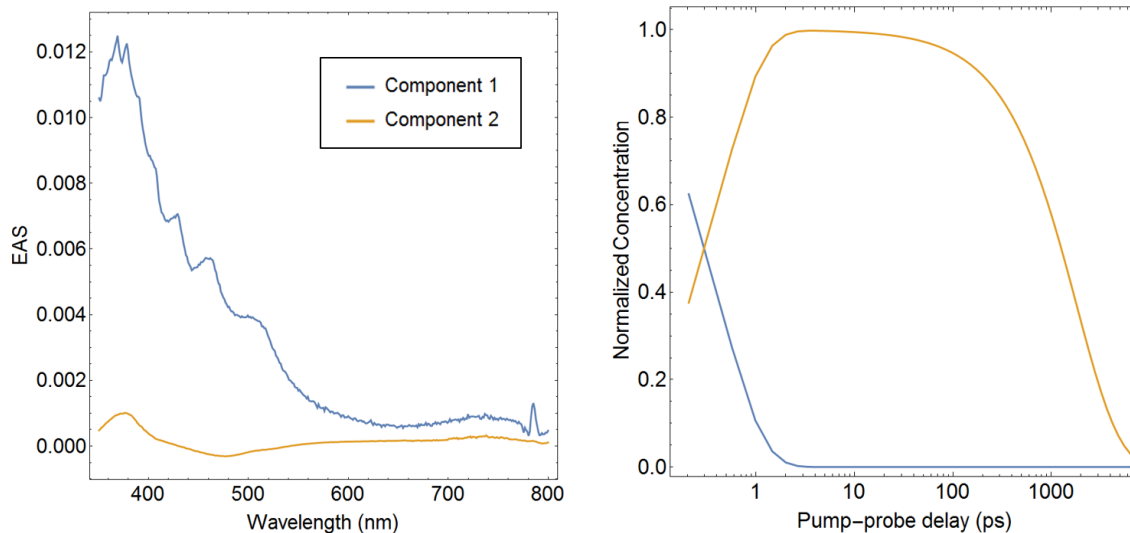

**Fig. S81.** Summary of 2 component global analysis of Ni(dtbbpy)(*o*-tolyl)Cl (**1-Cl**) transient absorption data (295 nm photoexcitation). Evolution associated spectra (left) and concentration profiles (right).

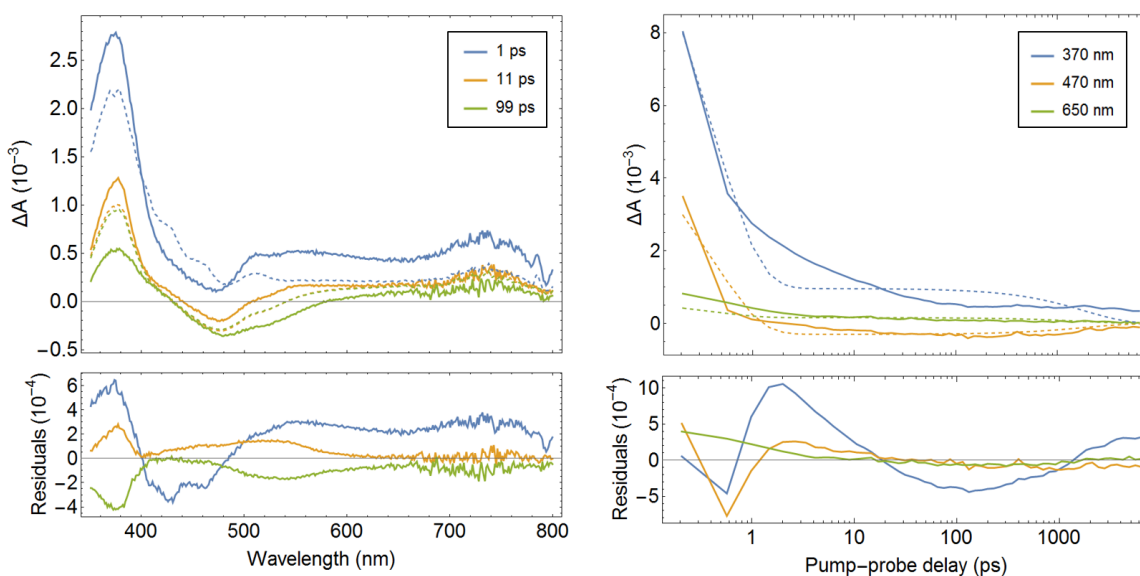

**Fig. S82.** Summary of 2 component global analysis of Ni(dtbbpy)(*o*-tolyl)Cl (**1-Cl**) transient absorption data (295 nm photoexcitation). Comparison of experimental (solid) and fit (dashed) difference absorption spectra at select pump-probe delays (left) and single wavelength kinetics (right).



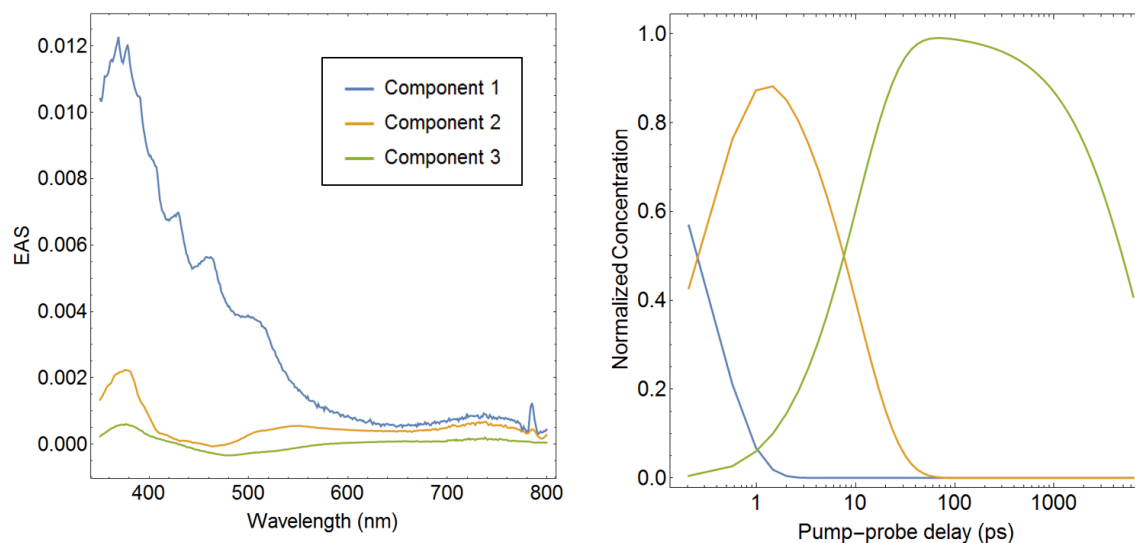

**Fig. S83.** Summary of **3** component global analysis of Ni(dtbbpy)(*o*-tolyl)Cl (**1-Cl**) transient absorption data (295 nm photoexcitation). Evolution associated spectra (left) and concentration profiles (right).

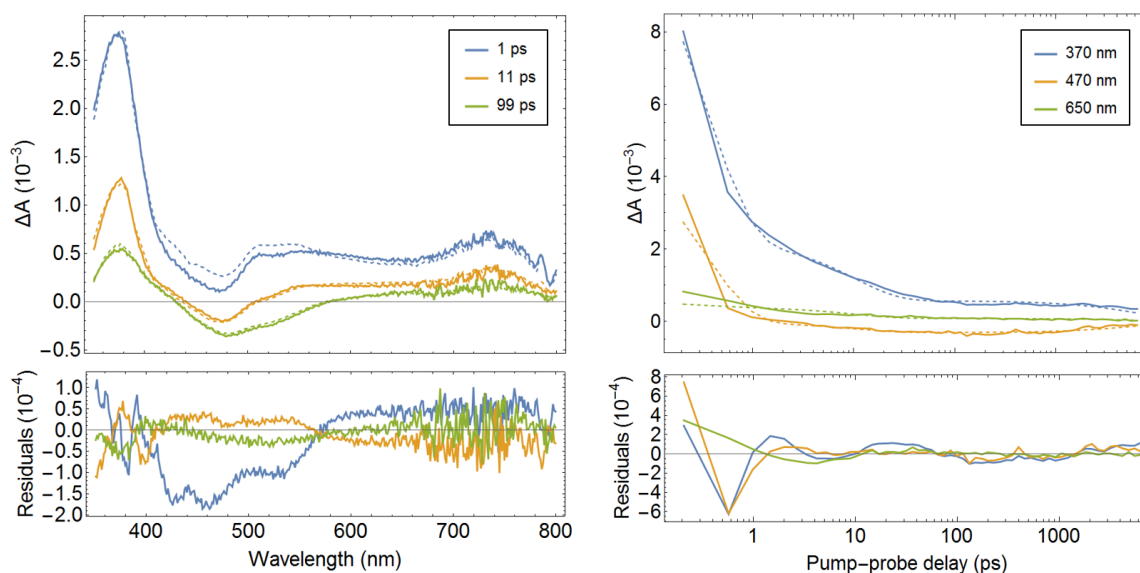

**Fig. S84.** Summary of **3** component global analysis of Ni(dtbbpy)(*o*-tolyl)Cl (**1-Cl**) transient absorption data (295 nm photoexcitation). Comparison of experimental (solid) and fit (dashed) difference absorption spectra at select pump-probe delays (left) and single wavelength kinetics (right).

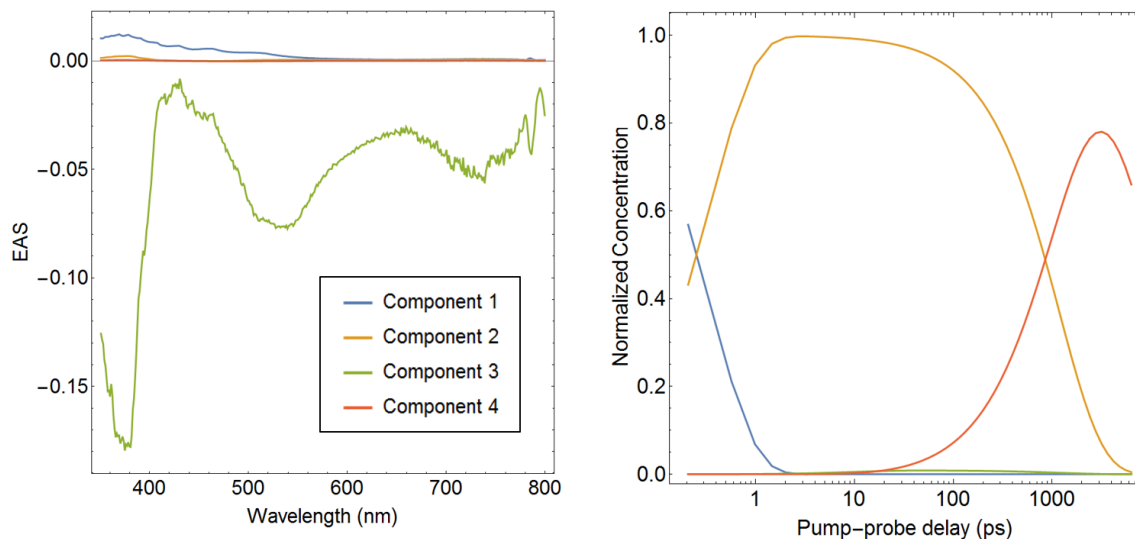

**Fig. S85.** Summary of 4 component global analysis of Ni(dtbbpy)(*o*-tolyl)Cl (**1-Cl**) transient absorption data (295 nm photoexcitation). Evolution associated spectra (left) and concentration profiles (right).

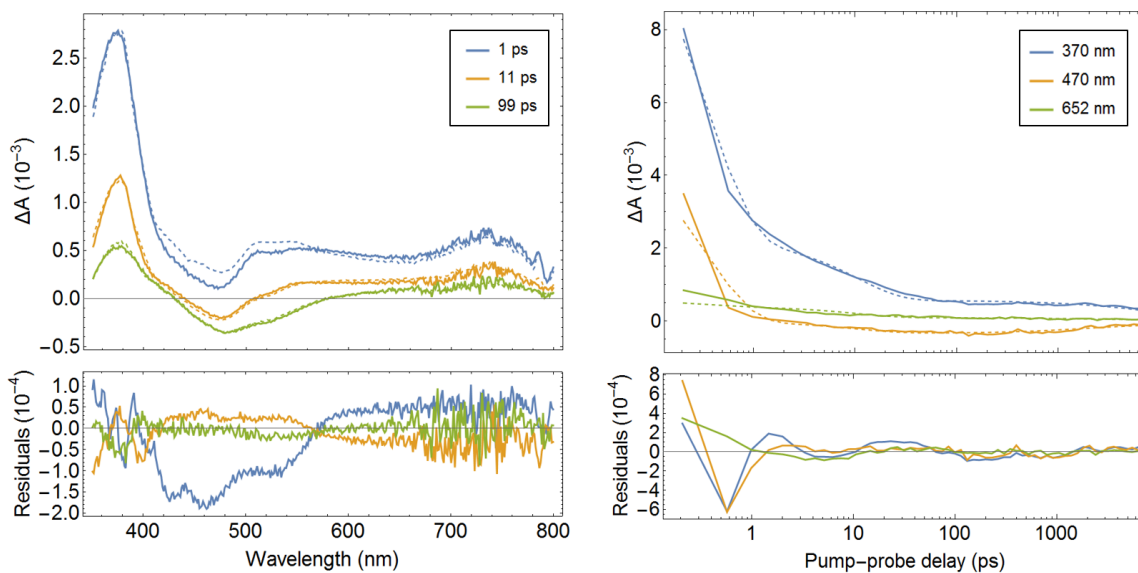

**Fig. S86.** Summary of 4 component global analysis of Ni(dtbbpy)(*o*-tolyl)Cl (**1-Cl**) transient absorption data (295 nm photoexcitation). Comparison of experimental (solid) and fit (dashed) difference absorption spectra at select pump-probe delays (left) and single wavelength kinetics (right).

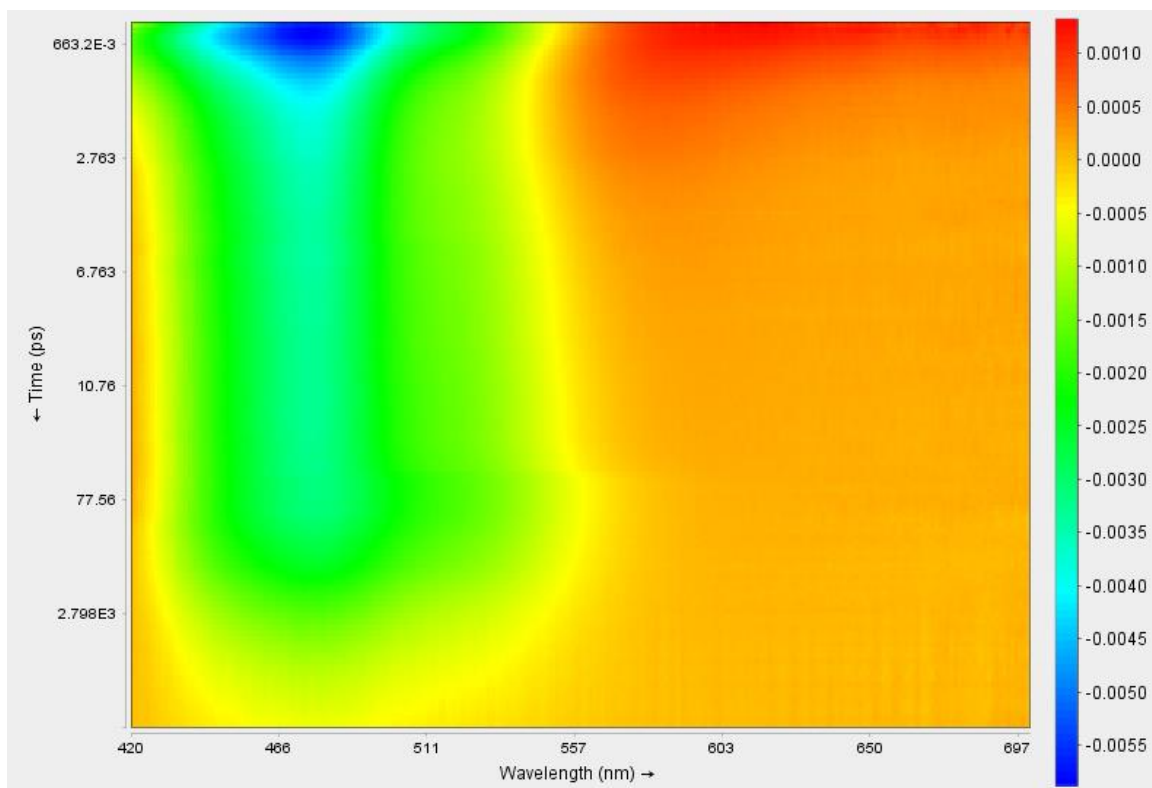

**Fig. S87.** Contour plot for portion of Ni(dtbbpy)(*o*-tolyl)Cl (**1-Cl**) transient absorption data used for global analysis (400 nm photoexcitation).

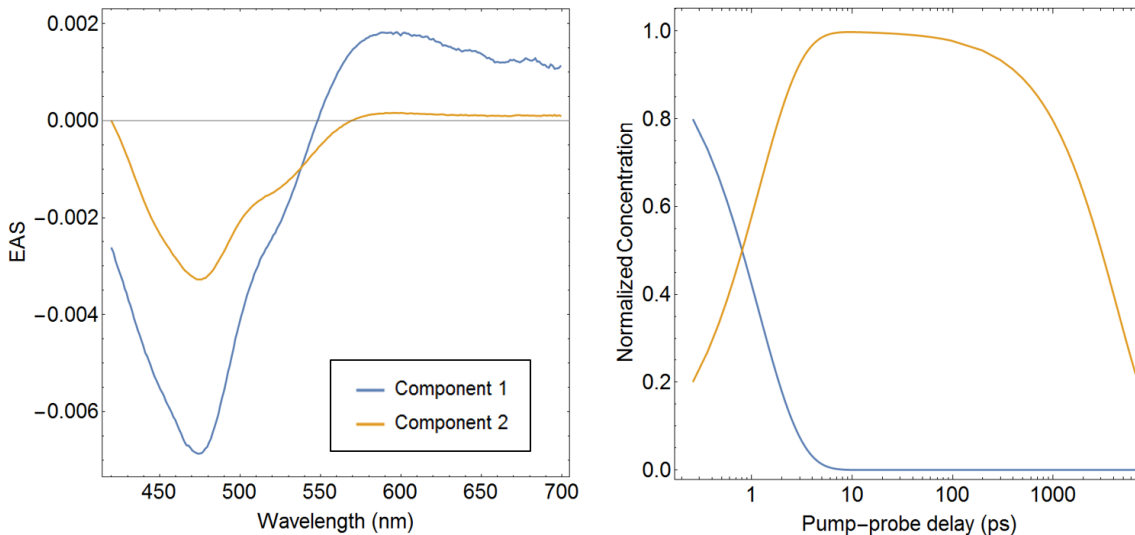

**Fig. S88.** Summary of 2 component global analysis of Ni(dtbbpy)(*o*-tolyl)Cl (**1-Cl**) transient absorption data (400 nm photoexcitation). Evolution associated spectra (left) and concentration profiles (right).

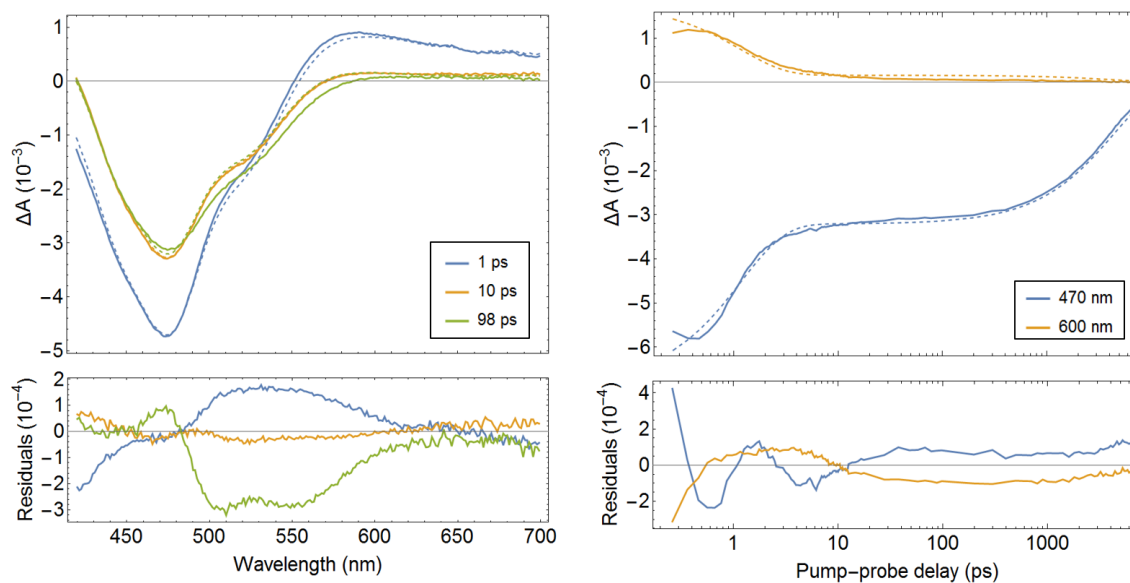

**Fig. S89.** Summary of 2 component global analysis of Ni(dtbbpy)(*o*-tolyl)Cl (**1-Cl**) transient absorption data (400 nm photoexcitation). Comparison of experimental (solid) and fit (dashed) difference absorption spectra at select pump-probe delays (left) and single wavelength kinetics (right).

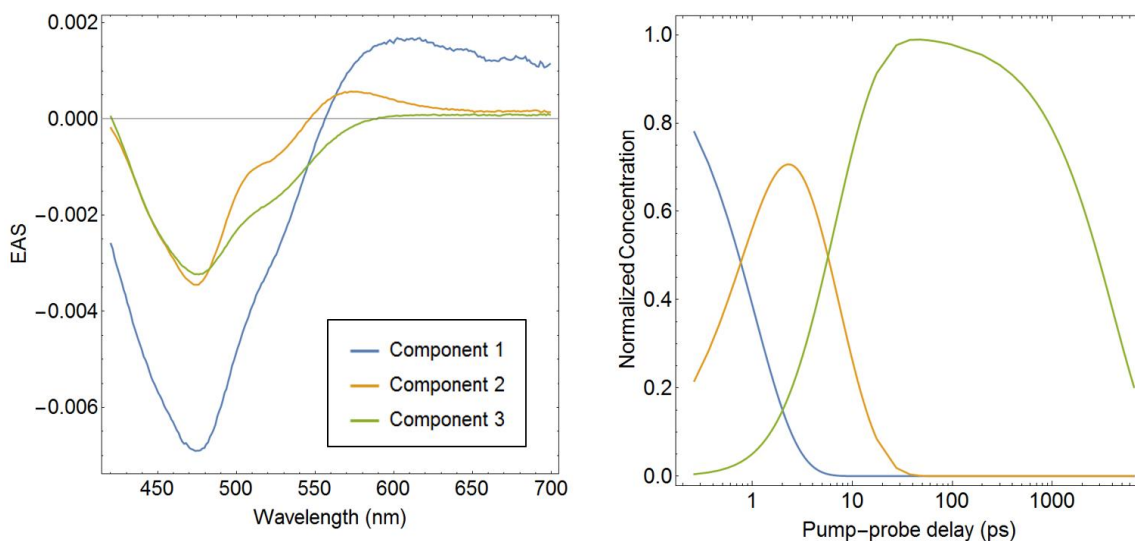

**Fig. S90.** Summary of **3** component global analysis of Ni(dtbbpy)(*o*-tolyl)Cl (**1-Cl**) transient absorption data (400 nm photoexcitation). Evolution associated spectra (left) and concentration profiles (right).

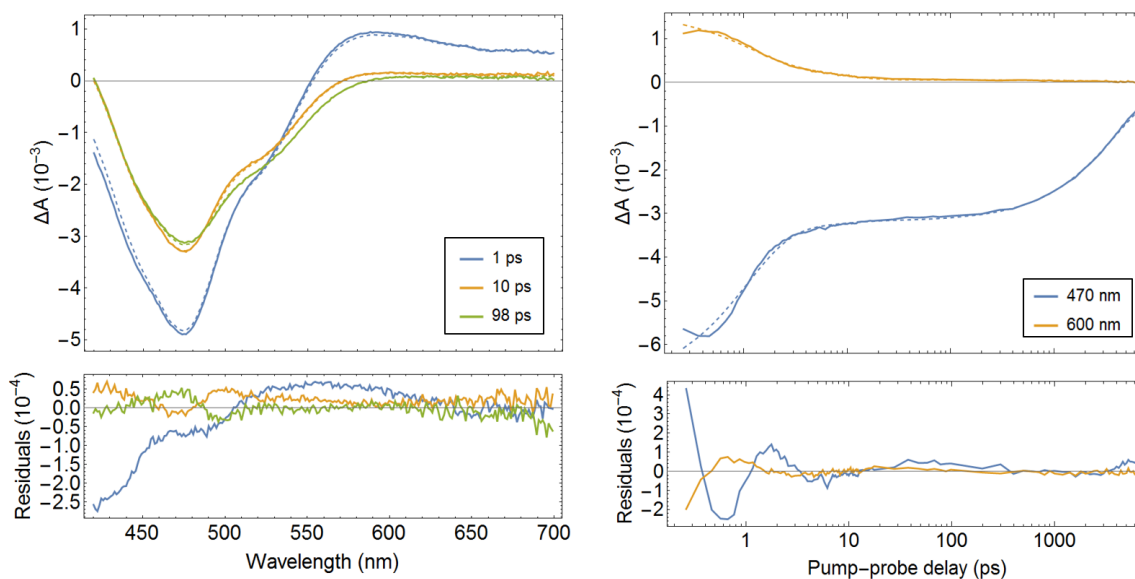

**Fig. S91.** Summary of **3** component global analysis of Ni(dtbbpy)(*o*-tolyl)Cl (**1-Cl**) transient absorption data (400 nm photoexcitation). Comparison of experimental (solid) and fit (dashed) difference absorption spectra at select pump-probe delays (left) and single wavelength kinetics (right).

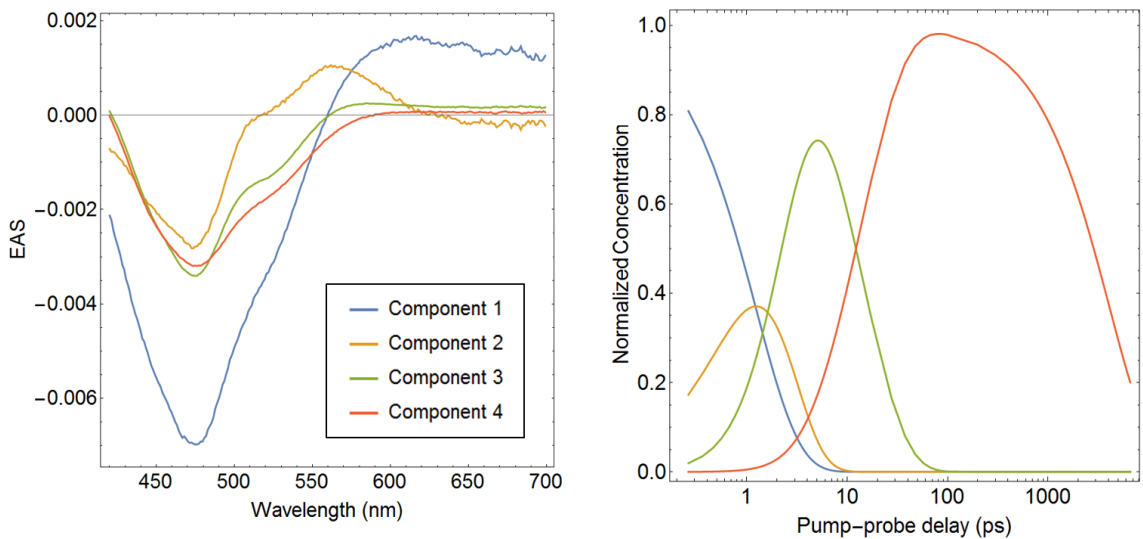

**Fig. S92.** Summary of 4 component global analysis of Ni(dtbbpy)(*o*-tolyl)Cl (**1-Cl**) transient absorption data (400 nm photoexcitation). Evolution associated spectra (left) and concentration profiles (right).

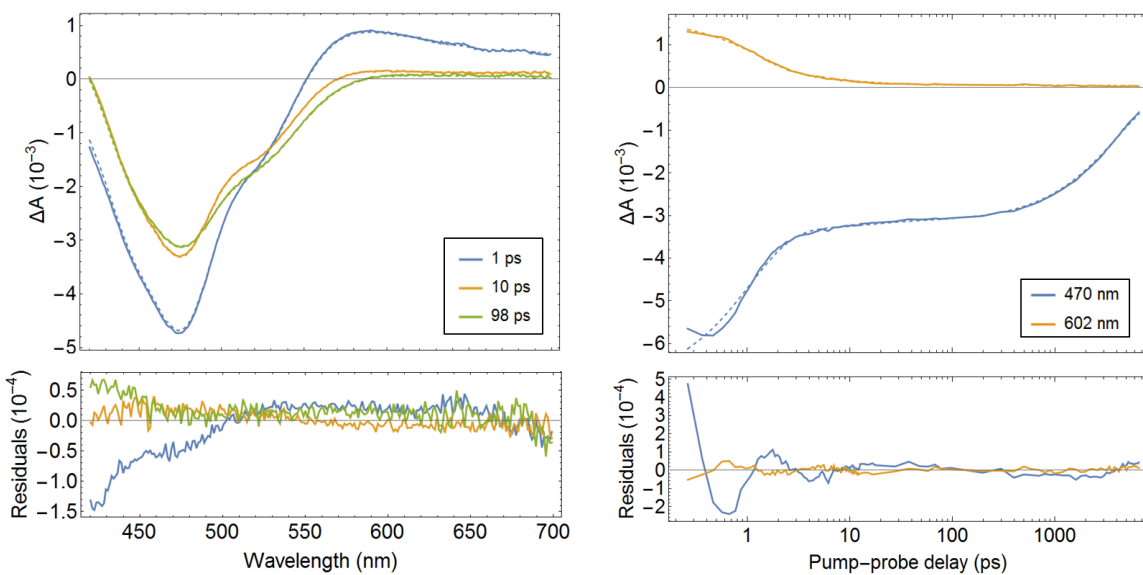

**Fig. S93.** Summary of 4 component global analysis of Ni(dtbbpy)(*o*-tolyl)Cl (**1-Cl**) transient absorption data (400 nm photoexcitation). Comparison of experimental (solid) and fit (dashed) difference absorption spectra at select pump-probe delays (left) and single wavelength kinetics (right).

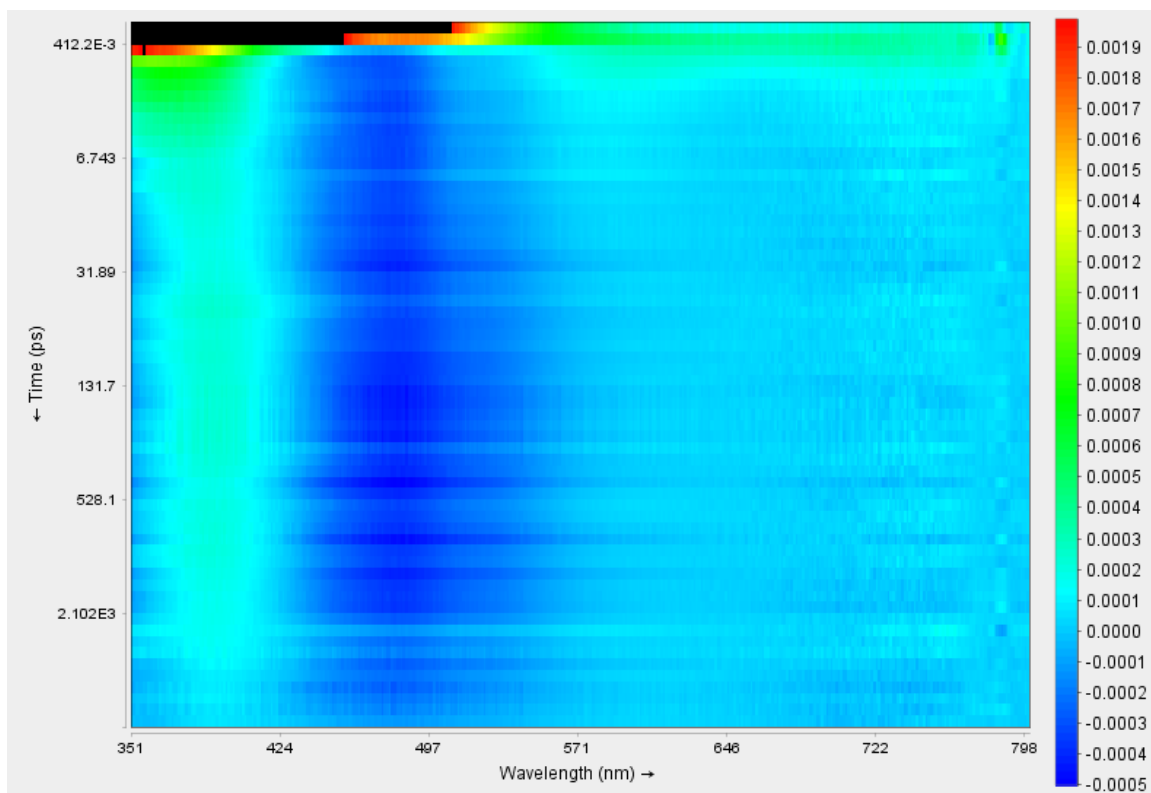

**Fig. S94.** Contour plot for portion of Ni(dtbbpy)(*o*-tolyl)Br (**1-Br**) transient absorption data used for global analysis (295 nm photoexcitation).

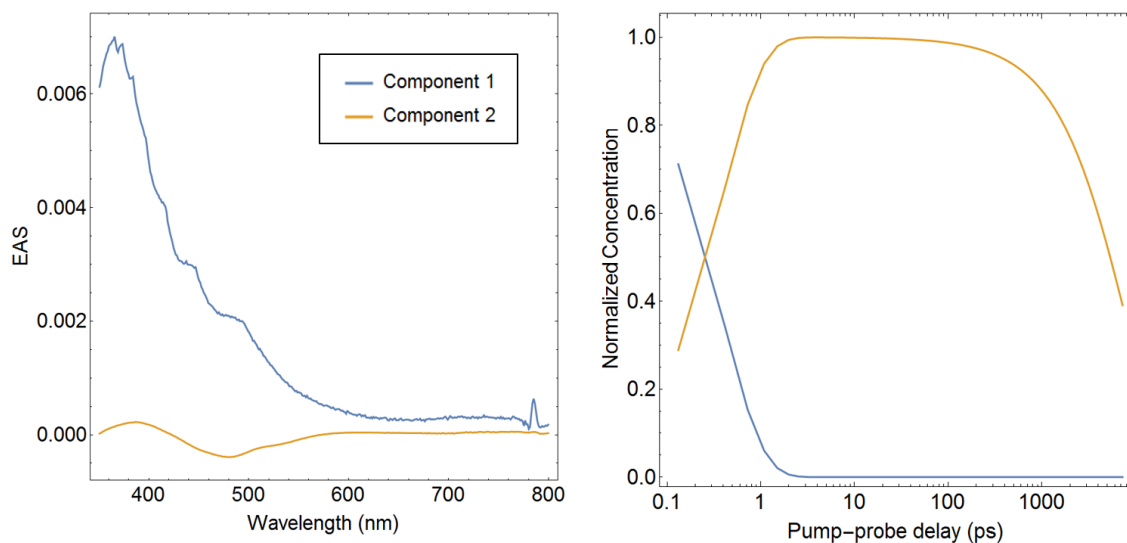

**Fig. S95.** Summary of 2 component global analysis of Ni(dtbbpy)(*o*-tolyl)Br (**1-Br**) transient absorption data (295 nm photoexcitation). Evolution associated spectra (left) and concentration profiles (right).

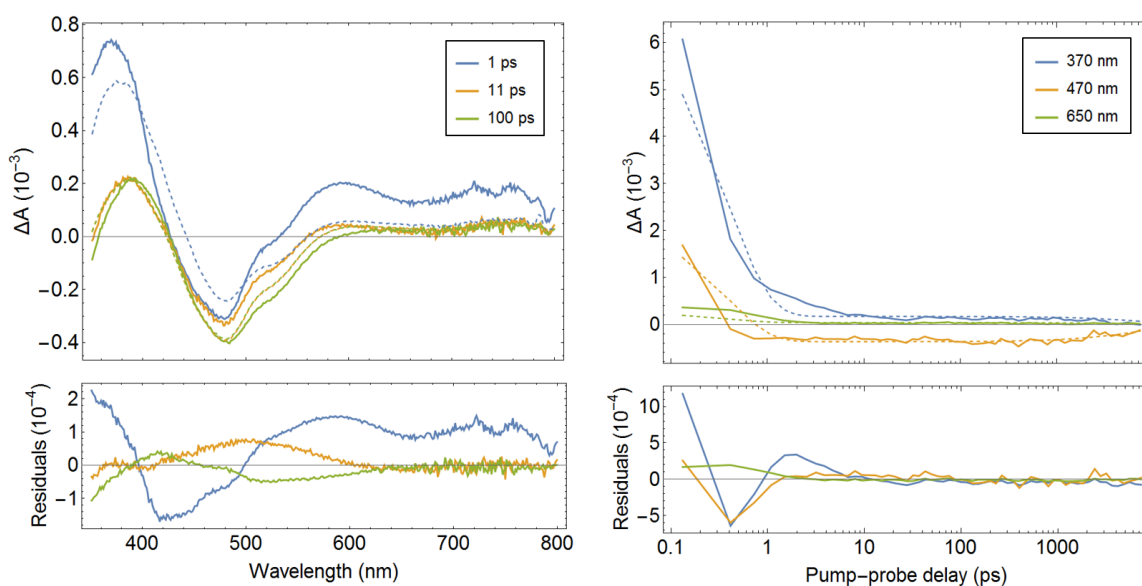

**Fig. S96.** Summary of 2 component global analysis of Ni(dtbbpy)(*o*-tolyl)Br (**1-Br**) transient absorption data (295 nm photoexcitation). Comparison of experimental (solid) and fit (dashed) difference absorption spectra at select pump-probe delays (left) and single wavelength kinetics (right).



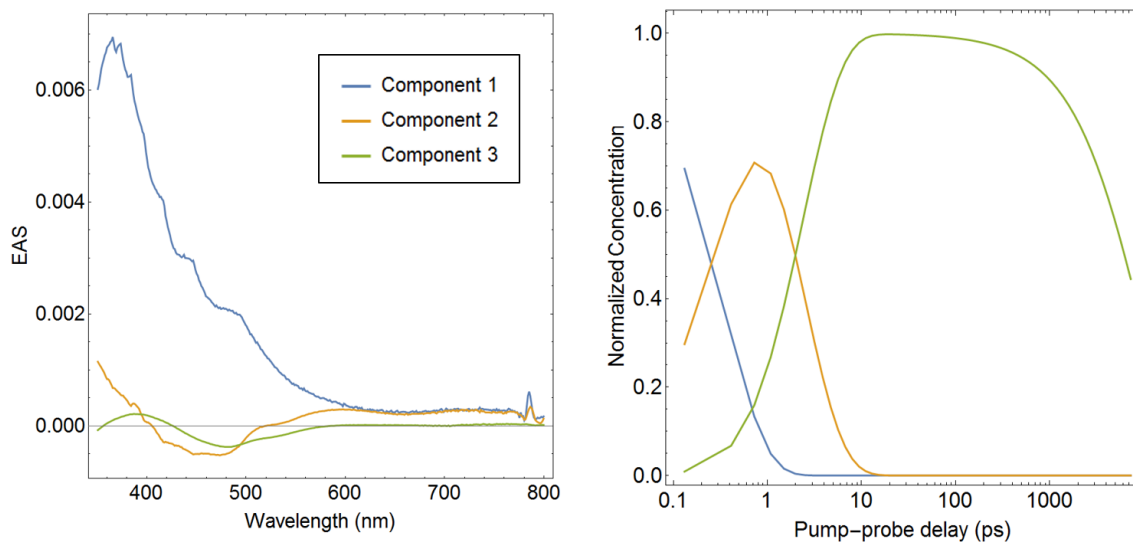

**Fig. S97.** Summary of 3 component global analysis of Ni(dtbbpy)(*o*-tolyl)Br (**1-Br**) transient absorption data (295 nm photoexcitation). Evolution associated spectra (left) and concentration profiles (right).

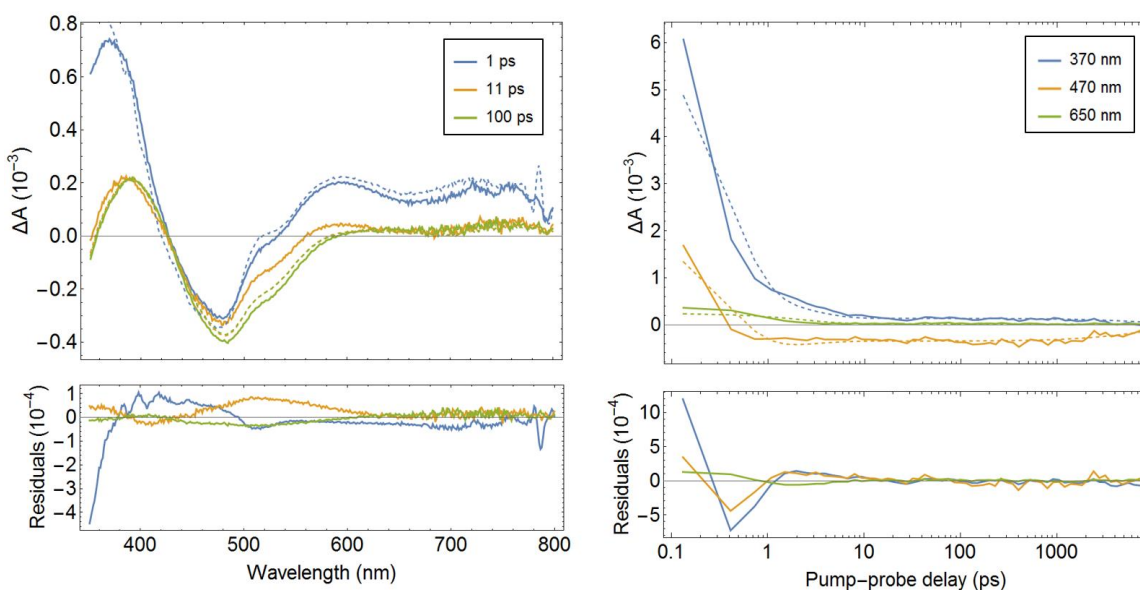

**Fig. S98.** Summary of 3 component global analysis of Ni(dtbbpy)(*o*-tolyl)Br (**1-Br**) transient absorption data (295 nm photoexcitation). Comparison of experimental (solid) and fit (dashed) difference absorption spectra at select pump-probe delays (left) and single wavelength kinetics (right).

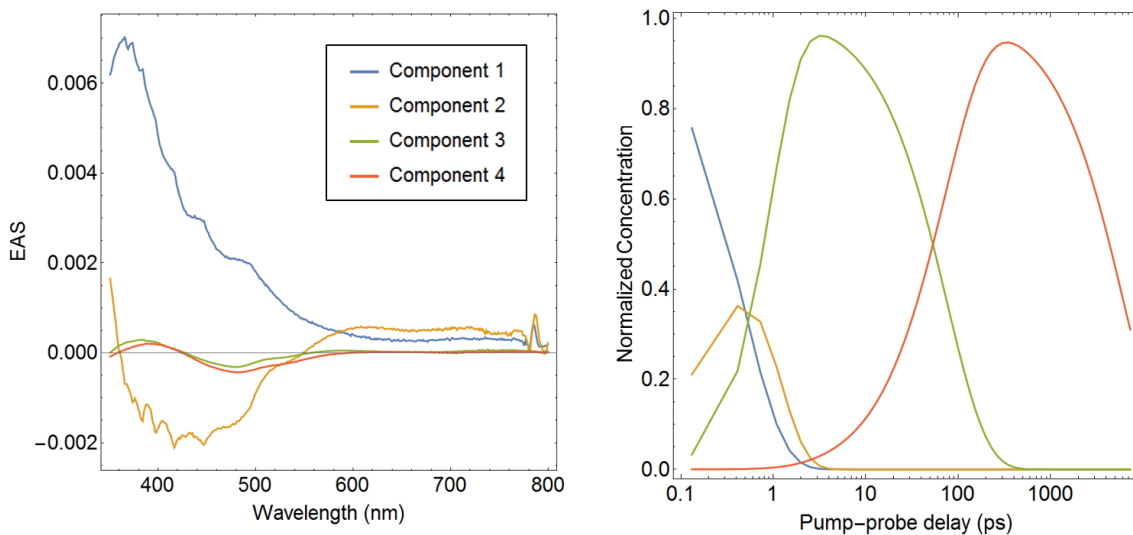

**Fig. S99.** Summary of 4 component global analysis of Ni(dtbbpy)(*o*-tolyl)Br (**1-Br**) transient absorption data (295 nm photoexcitation). Evolution associated spectra (left) and concentration profiles (right).

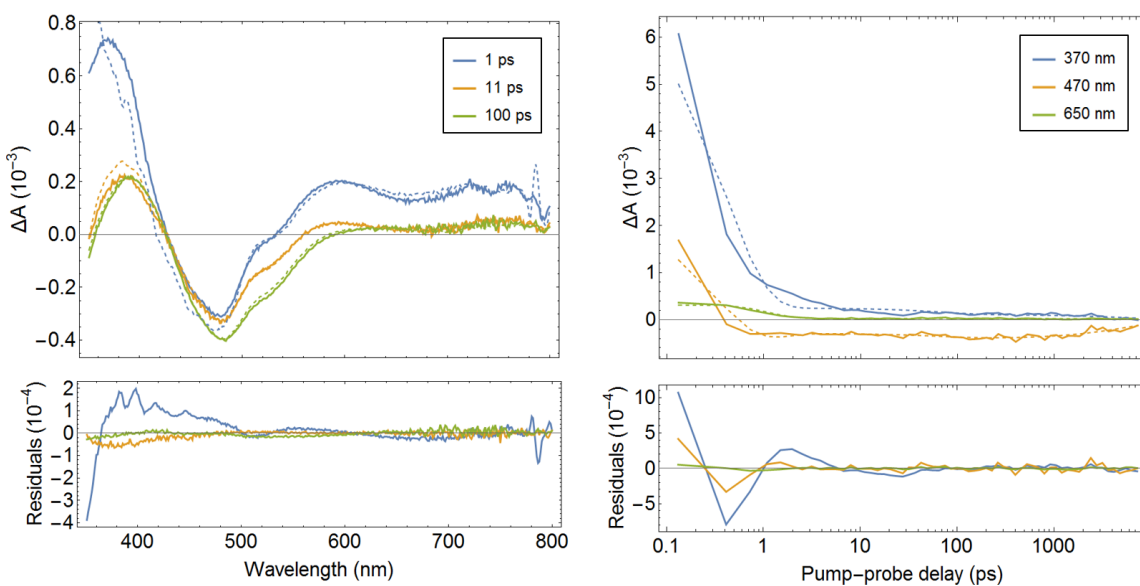

**Fig. S100.** Summary of 4 component global analysis of Ni(dtbbpy)(*o*-tolyl)Br (**1-Br**) transient absorption data (295 nm photoexcitation). Comparison of experimental (solid) and fit (dashed) difference absorption spectra at select pump-probe delays (left) and single wavelength kinetics (right).

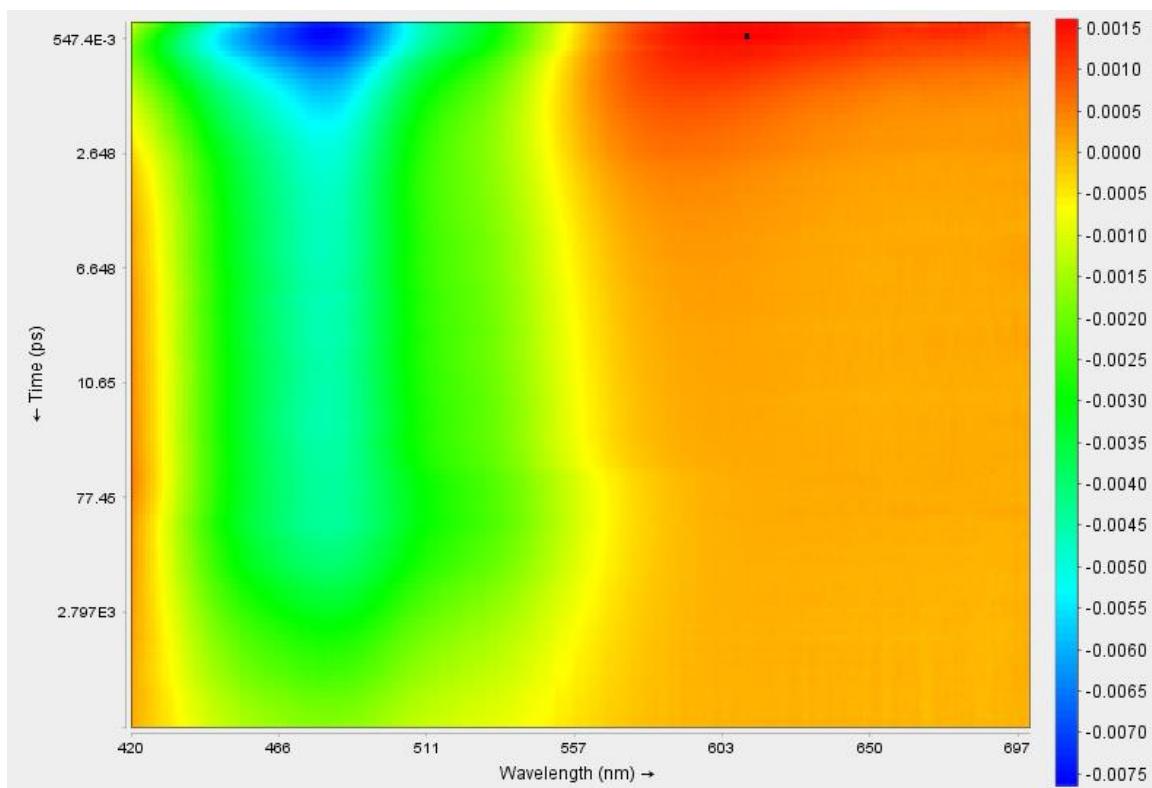

**Fig. S101.** Contour plot for portion of Ni(dtbbpy)(*o*-tolyl)Br (**1-Br**) transient absorption data used for global analysis (400 nm photoexcitation).

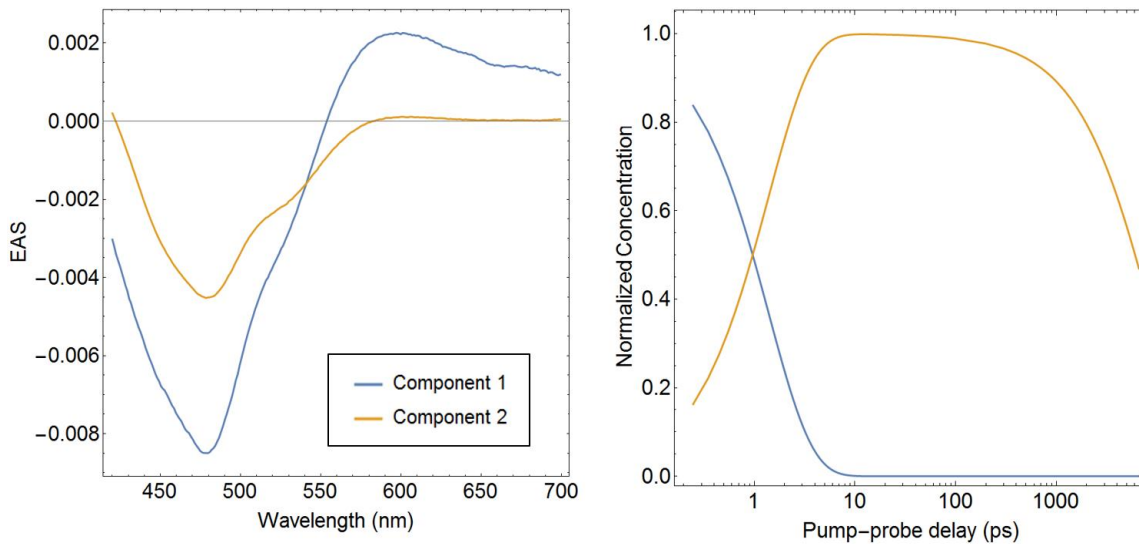

**Fig. S102.** Summary of 2 component global analysis of Ni(dtbbpy)(*o*-tolyl)Br (**1-Br**) transient absorption data (400 nm photoexcitation). Evolution associated spectra (left) and concentration profiles (right).

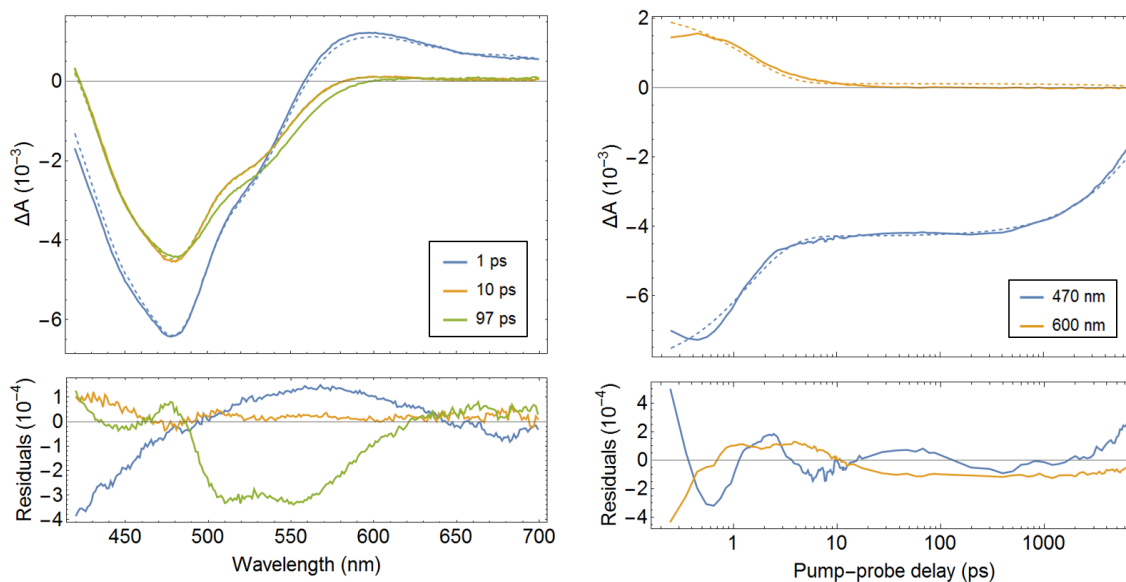

**Fig. S103.** Summary of 2 component global analysis of Ni(dtbbpy)(*o*-tolyl)Br (**1-Br**) transient absorption data (400 nm photoexcitation). Comparison of experimental (solid) and fit (dashed) difference absorption spectra at select pump-probe delays (left) and single wavelength kinetics (right).

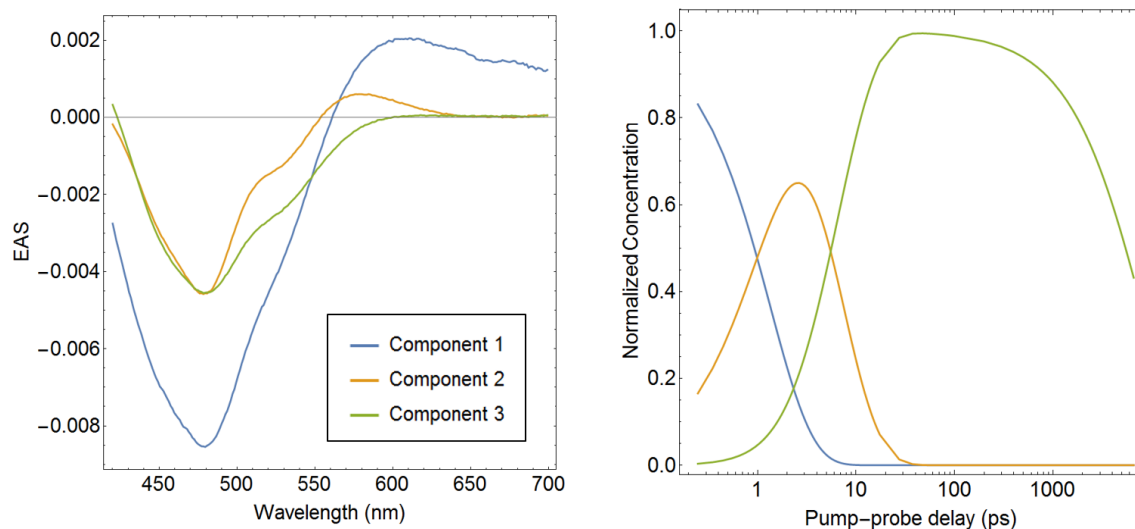

**Fig. S104.** Summary of **3** component global analysis of Ni(dtbbpy)(*o*-tolyl)Br (**1-Br**) transient absorption data (400 nm photoexcitation). Evolution associated spectra (left) and concentration profiles (right).

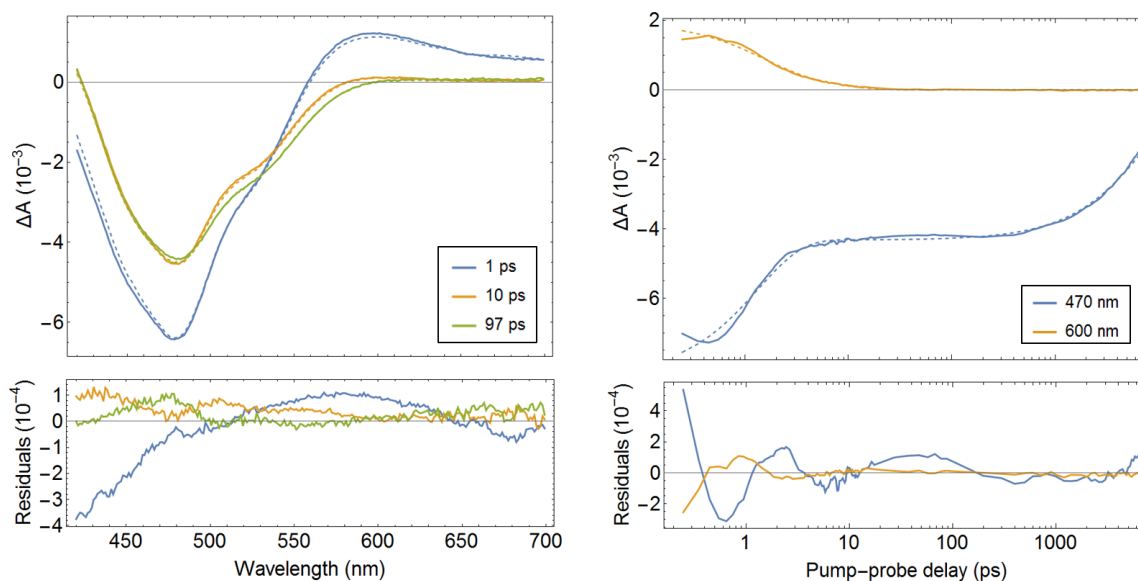

**Fig. S105.** Summary of **3** component global analysis of Ni(dtbbpy)(*o*-tolyl)Br (**1-Br**) transient absorption data (400 nm photoexcitation). Comparison of experimental (solid) and fit (dashed) difference absorption spectra at select pump-probe delays (left) and single wavelength kinetics (right).

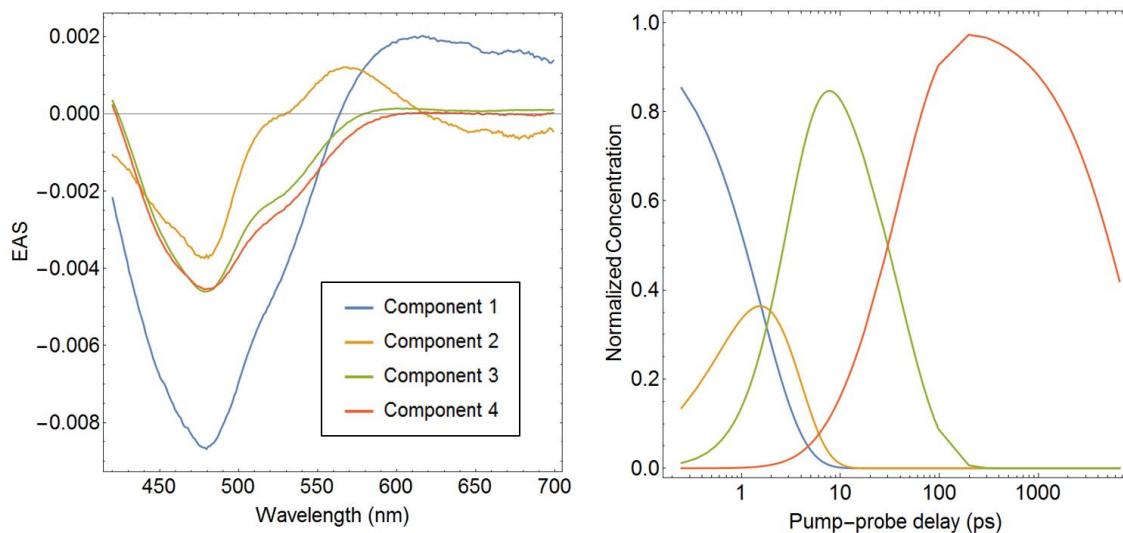

**Fig. S106.** Summary of 4 component global analysis of Ni(dtbbpy)(*o*-tolyl)Br (**1-Br**) transient absorption data (400 nm photoexcitation). Evolution associated spectra (left) and concentration profiles (right).

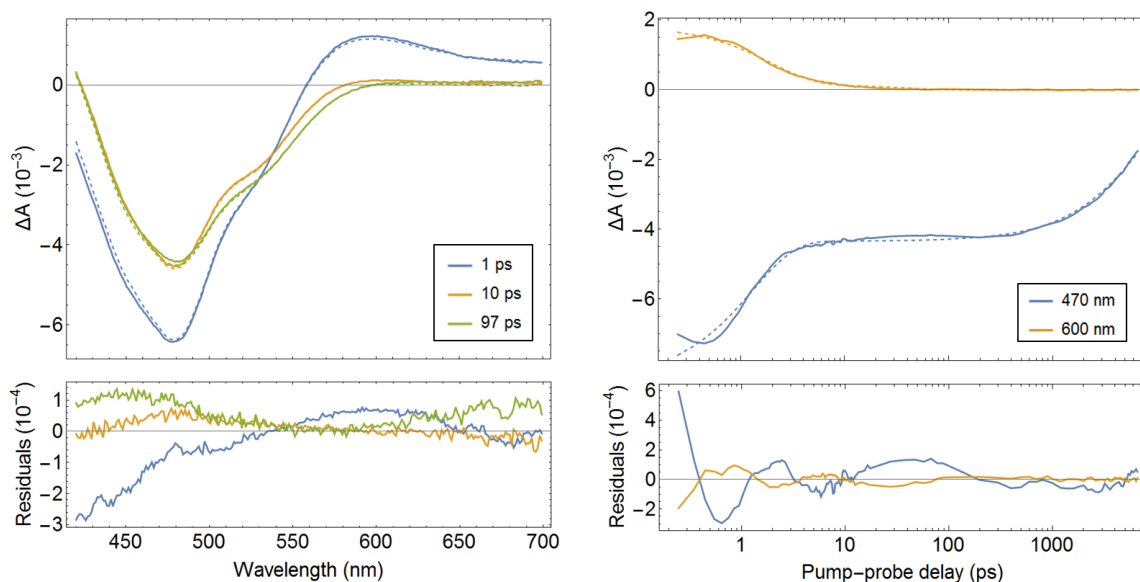

**Fig. S107.** Summary of 4 component global analysis of Ni(dtbbpy)(*o*-tolyl)Br (**1-Br**) transient absorption data (400 nm photoexcitation). Comparison of experimental (solid) and fit (dashed) difference absorption spectra at select pump-probe delays (left) and single wavelength kinetics (right).

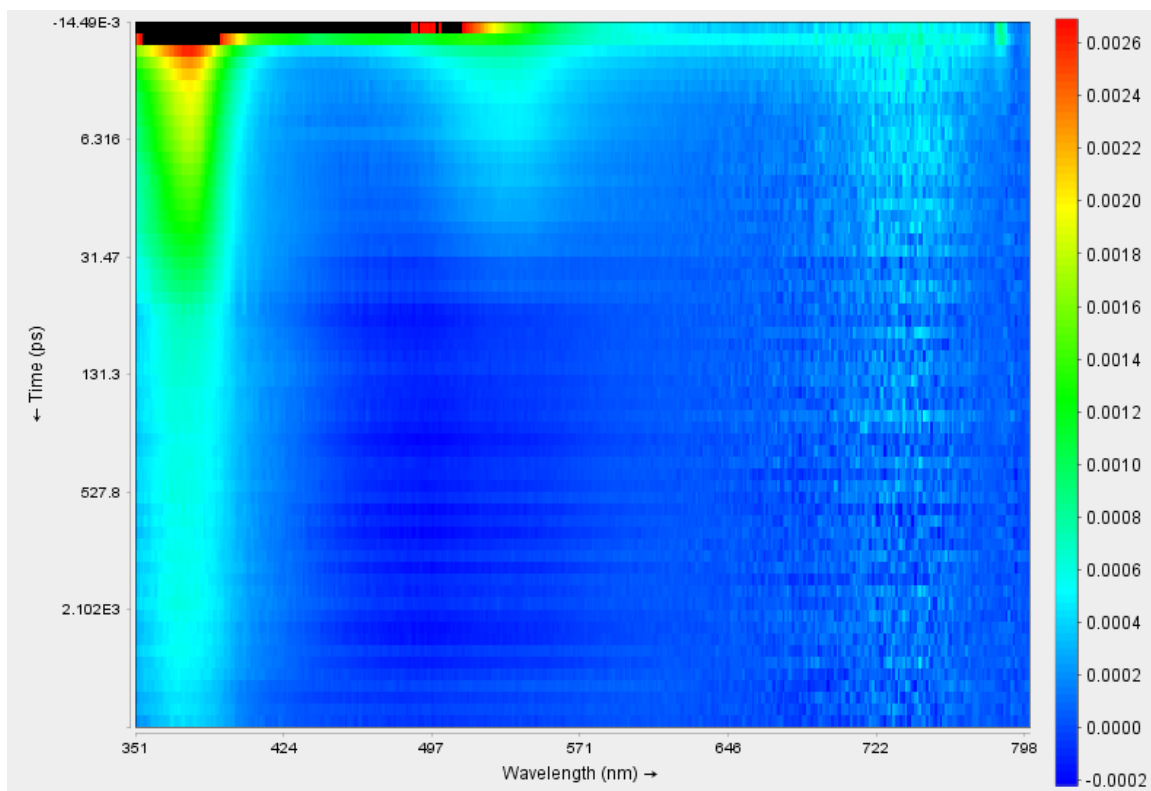

**Fig. S108.** Contour plot for portion of Ni(dtbbpy)(*o*-tolyl)I (**1-I**) transient absorption data used for global analysis (295 nm photoexcitation).

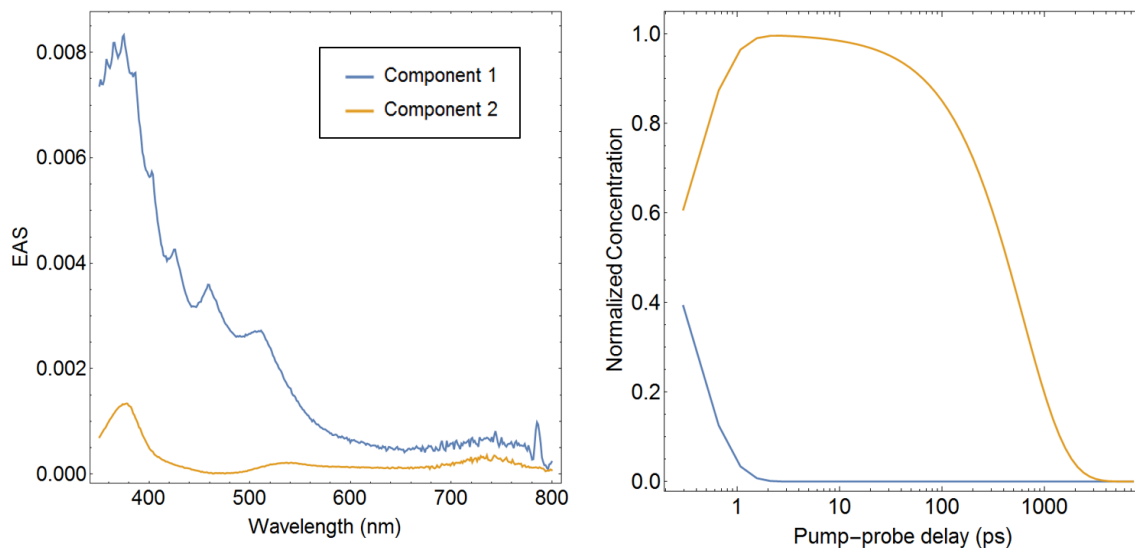

**Fig. S109.** Summary of 2 component global analysis of Ni(dtbbpy)(*o*-tolyl)I (**1-I**) transient absorption data (295 nm photoexcitation). Evolution associated spectra (left) and concentration profiles (right).

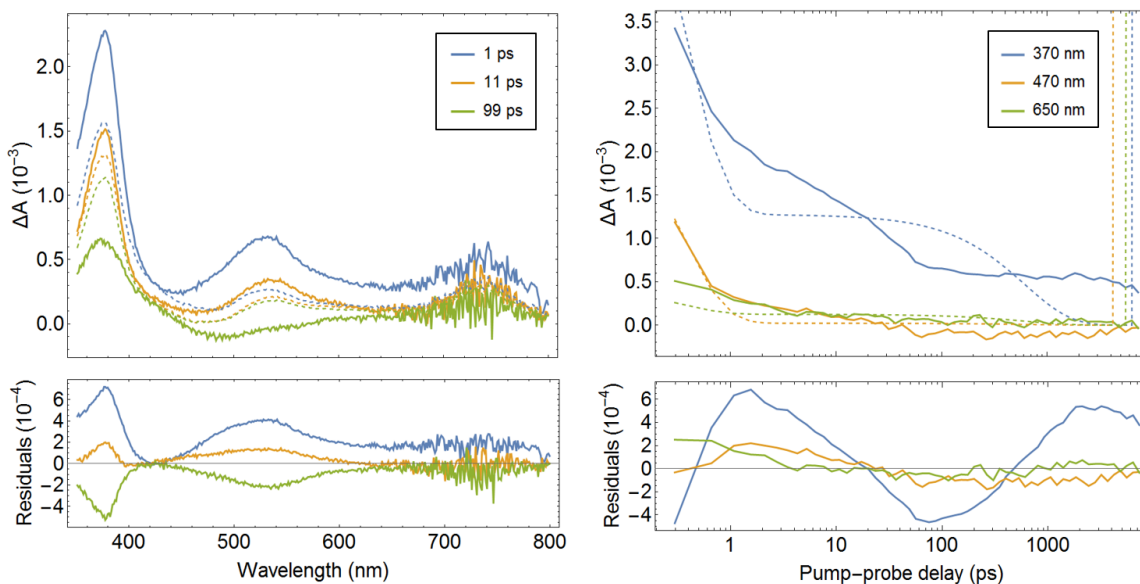

**Fig. S110.** Summary of 2 component global analysis of Ni(dtbbpy)(*o*-tolyl)I (**1-I**) transient absorption data (295 nm photoexcitation). Comparison of experimental (solid) and fit (dashed) difference absorption spectra at select pump-probe delays (left) and single wavelength kinetics (right).



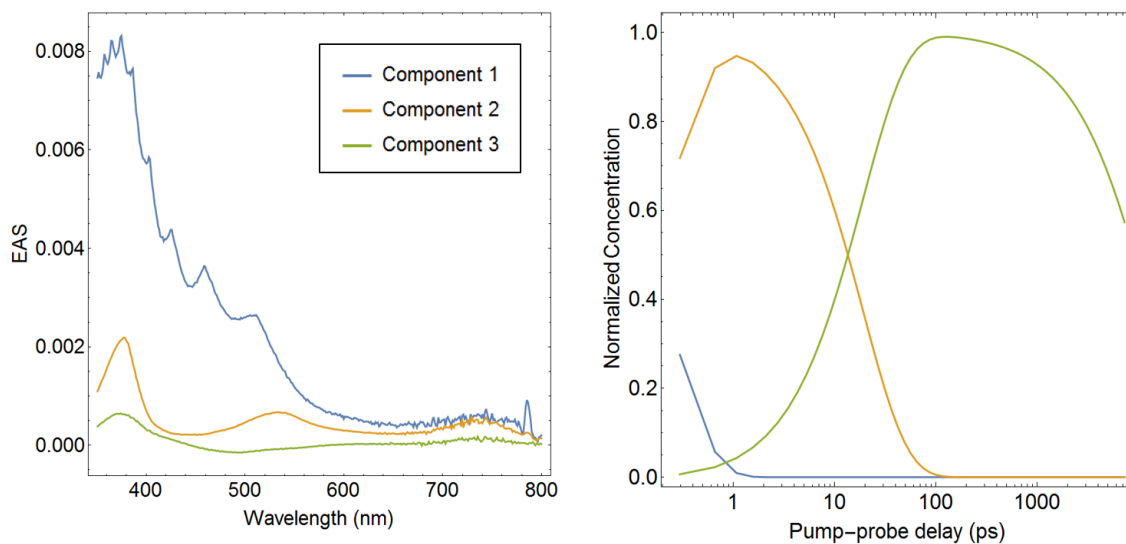

**Fig. S111.** Summary of 3 component global analysis of Ni(dtbbpy)(*o*-tolyl)I (**1-I**) transient absorption data (295 nm photoexcitation). Evolution associated spectra (left) and concentration profiles (right).

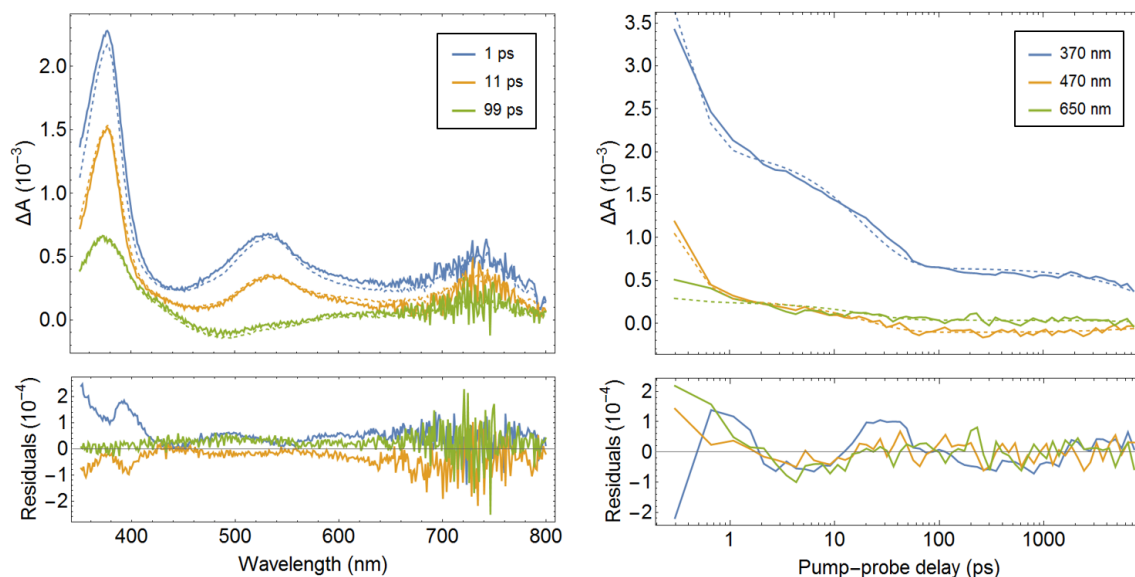

**Fig. S112.** Summary of 3 component global analysis of Ni(dtbbpy)(*o*-tolyl)I (**1-I**) transient absorption data (295 nm photoexcitation). Comparison of experimental (solid) and fit (dashed) difference absorption spectra at select pump-probe delays (left) and single wavelength kinetics (right).

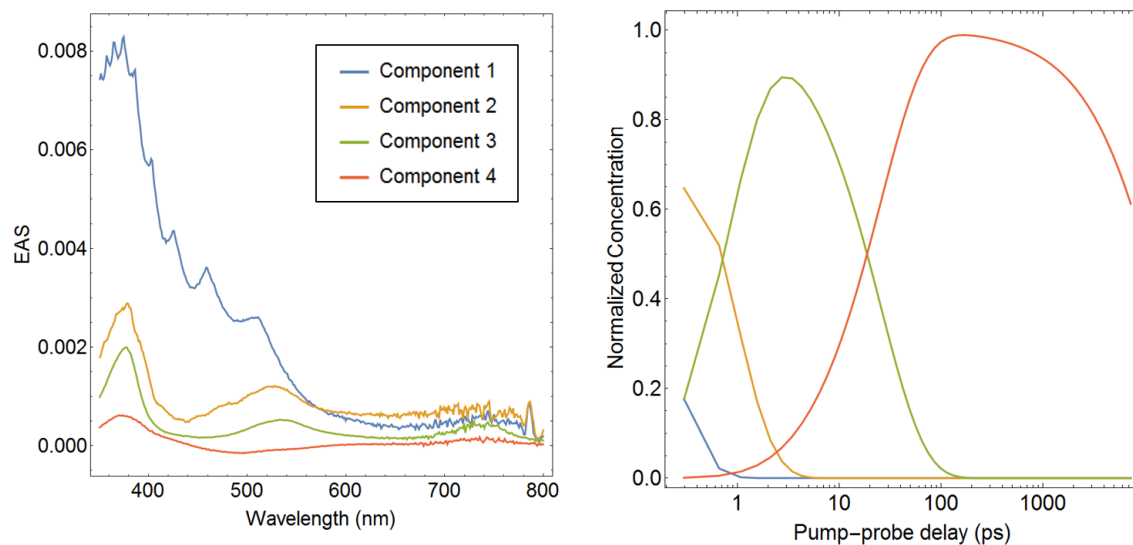

**Fig. S113.** Summary of 4 component global analysis of Ni(dtbbpy)(*o*-tolyl)I (**1-I**) transient absorption data (295 nm photoexcitation). Evolution associated spectra (left) and concentration profiles (right).

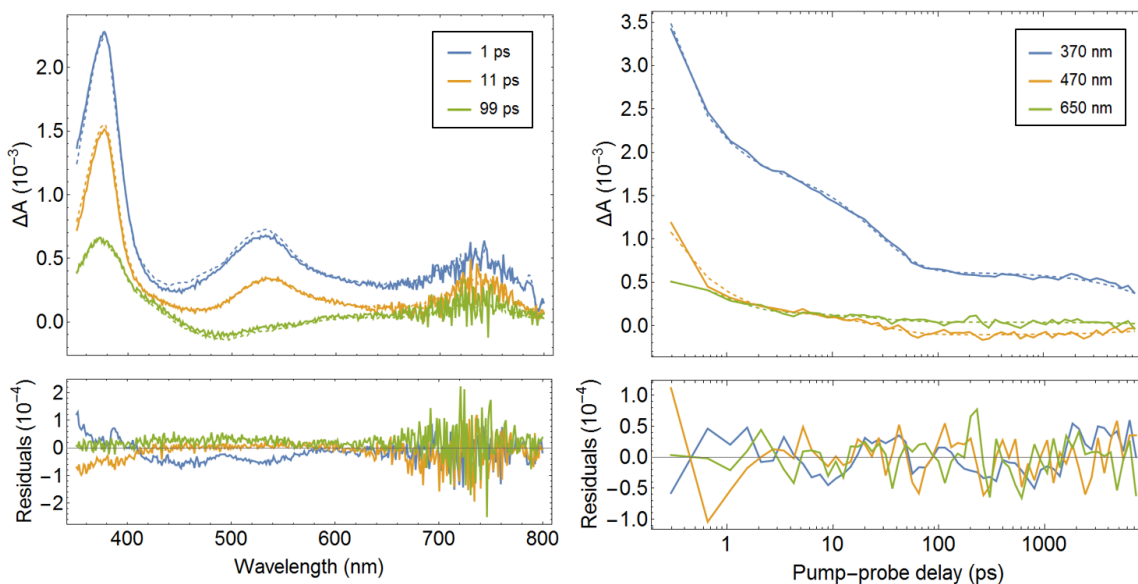

**Fig. S114.** Summary of 4 component global analysis of Ni(dtbbpy)(*o*-tolyl)I (**1-I**) transient absorption data (295 nm photoexcitation). Comparison of experimental (solid) and fit (dashed) difference absorption spectra at select pump-probe delays (left) and single wavelength kinetics (right).

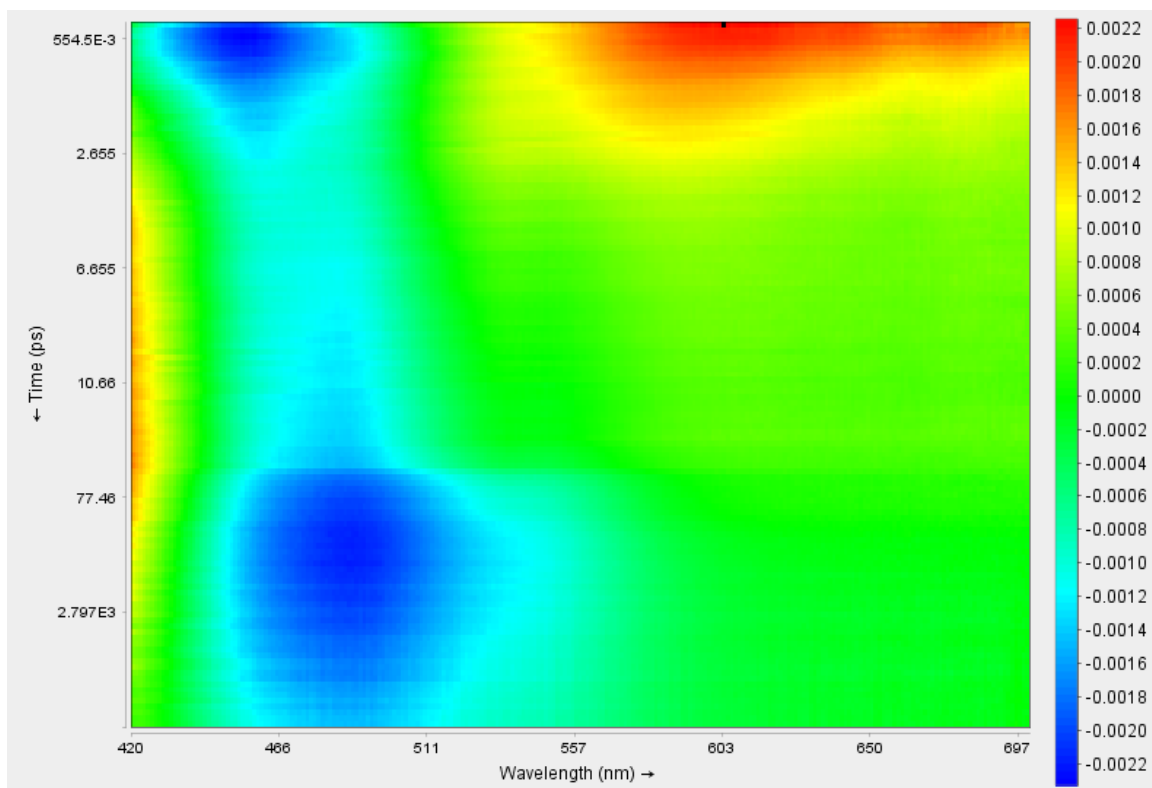

**Fig. S115.** Contour plot for portion of Ni(dtbbpy)(*o*-tolyl)I (**1-I**) transient absorption data used for global analysis (400 nm photoexcitation).

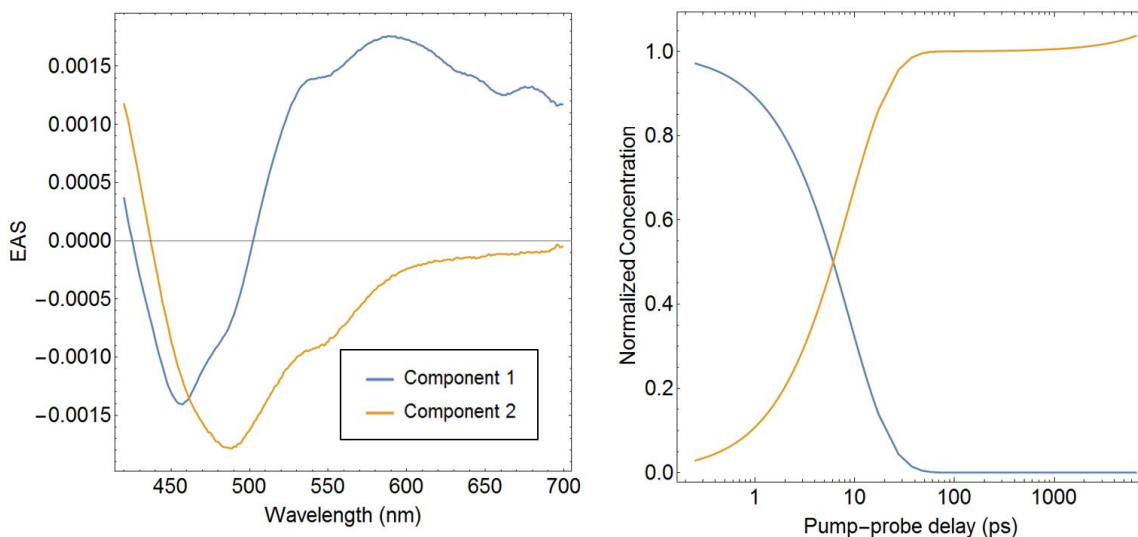

**Fig. S116.** Summary of **2** component global analysis of Ni(dtbbpy)(*o*-tolyl)I (**1-I**) transient absorption data (400 nm photoexcitation). Evolution associated spectra (left) and concentration profiles (right).

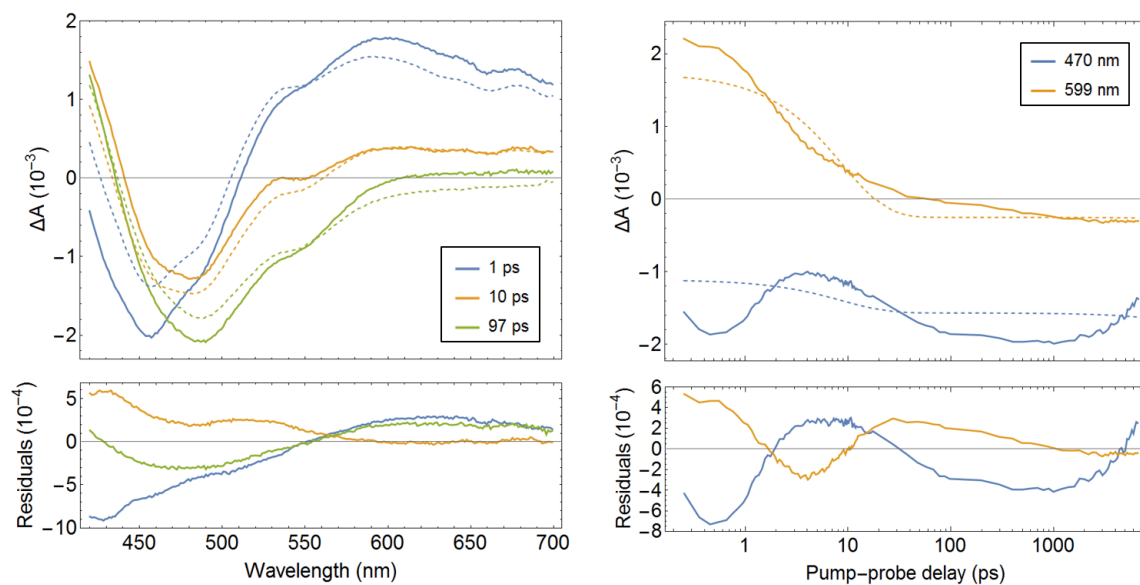

**Fig. S117.** Summary of **2** component global analysis of Ni(dtbbpy)(*o*-tolyl)I (**1-I**) transient absorption data (400 nm photoexcitation). Comparison of experimental (solid) and fit (dashed) difference absorption spectra at select pump-probe delays (left) and single wavelength kinetics (right).

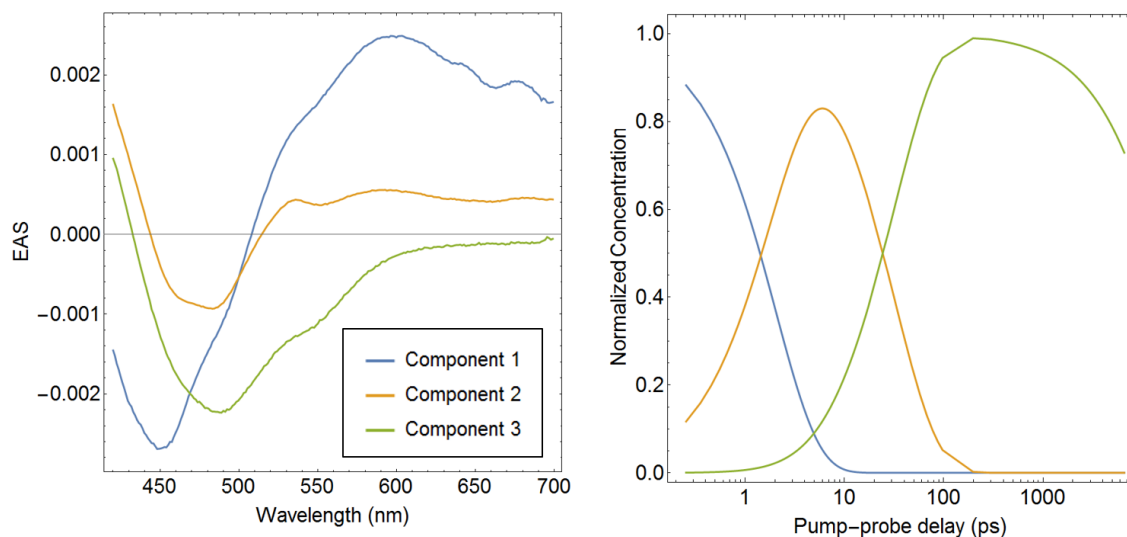

**Fig. S118.** Summary of **3** component global analysis of Ni(dtbbpy)(*o*-tolyl)I (**1-I**) transient absorption data (400 nm photoexcitation). Evolution associated spectra (left) and concentration profiles (right).

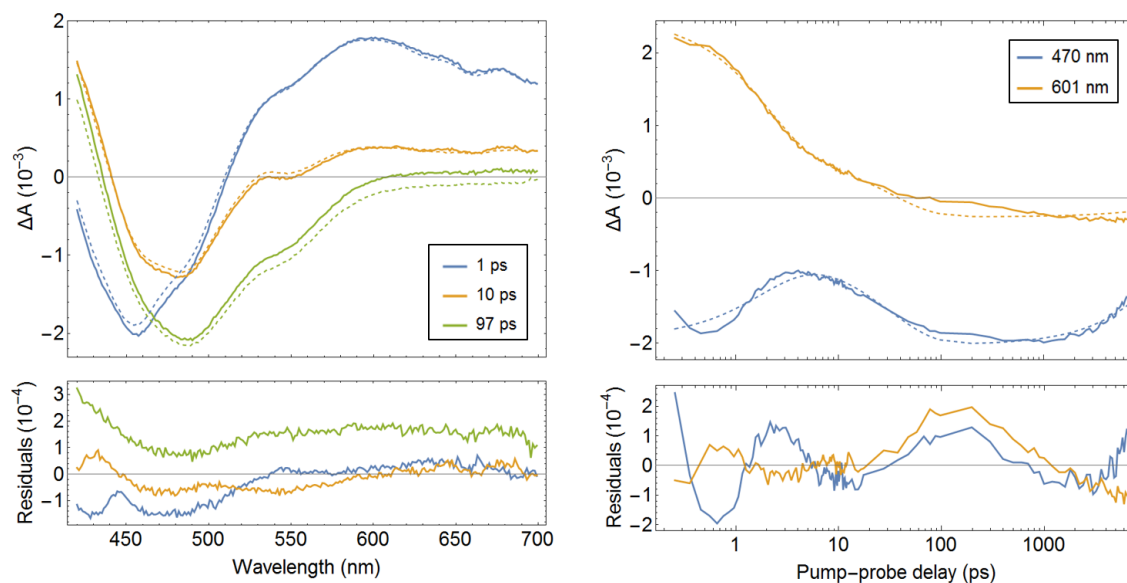

**Fig. S119.** Summary of **3** component global analysis of Ni(dtbbpy)(*o*-tolyl)I (**1-I**) transient absorption data (400 nm photoexcitation). Comparison of experimental (solid) and fit (dashed) difference absorption spectra at select pump-probe delays (left) and single wavelength kinetics (right).

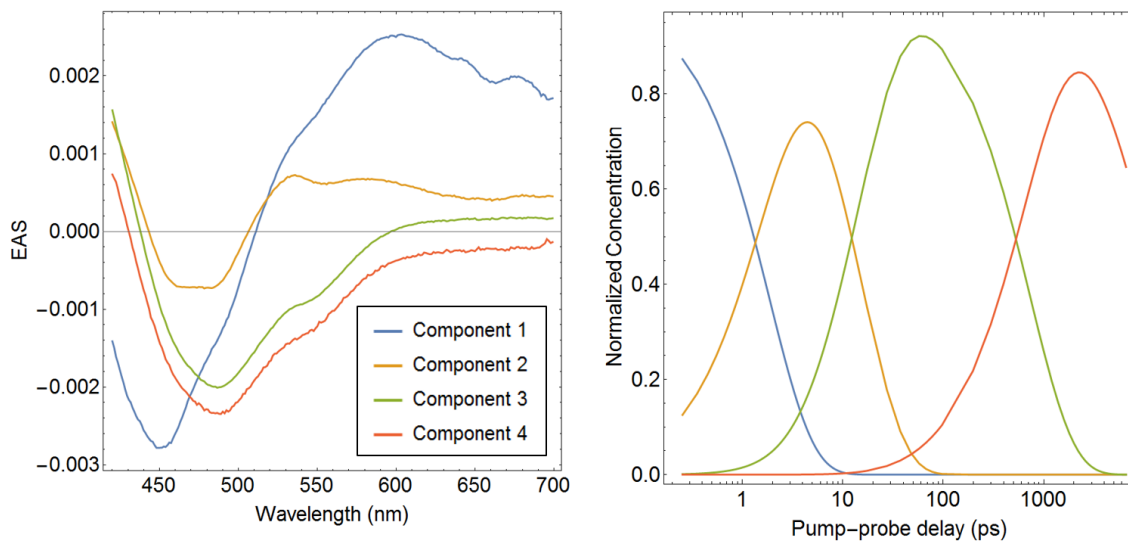

**Fig. S120.** Summary of 4 component global analysis of Ni(dtbbpy)(*o*-tolyl)I (**1-I**) transient absorption data (400 nm photoexcitation). Evolution associated spectra (left) and concentration profiles (right).

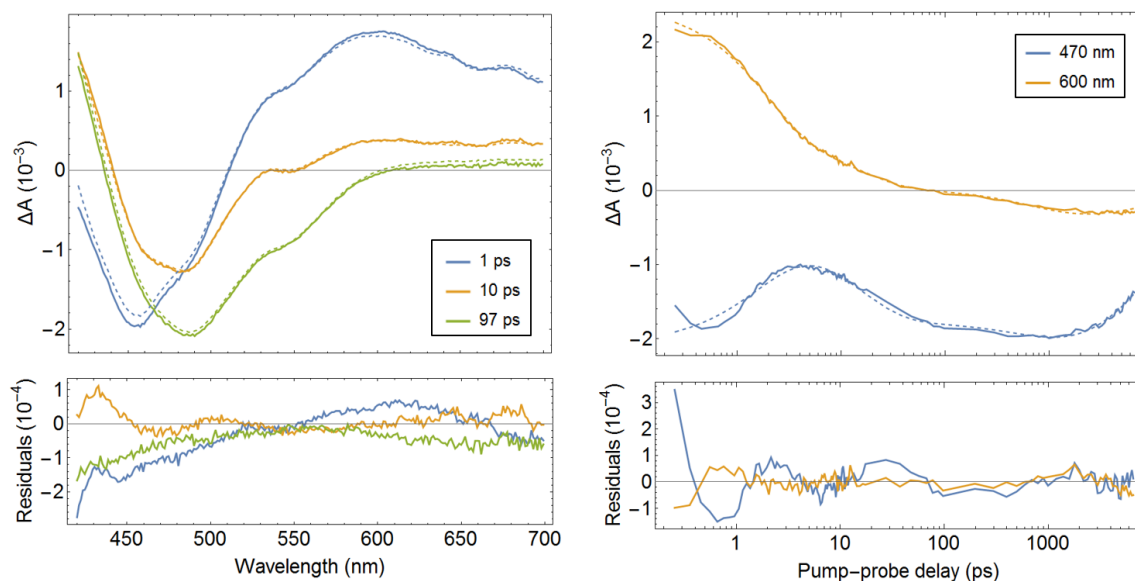

**Fig. S121.** Summary of 4 component global analysis of Ni(dtbbpy)(*o*-tolyl)I (**1-I**) transient absorption data (400 nm photoexcitation). Comparison of experimental (solid) and fit (dashed) difference absorption spectra at select pump-probe delays (left) and single wavelength kinetics (right).

## VII. Photolytic and Thermal Degradation Studies

**Degradation Studies.** All samples were prepared inside a nitrogen filled glove box. Note that the solution temperature was measured to be 34°C in a typical photolytic degradation experiment. For  $^1\text{H}$  NMR degradation studies, a solution of **1-Cl** (8.0 mg, 17.6  $\mu\text{mol}$ ) in THF-d8 (1.3 mL, 13.5 mM) was split between two NMR tubes (0.6 mL each). The tubes were then sealed with plastic caps and electrical tape and removed from the glovebox. One sample was then irradiated with a 34 W blue LED (1.5 in away, measured intensity = 4061  $\mu\text{Einsteins s}^{-1}\text{m}^{-2}$ ) while the other was placed in a dark heating bath at 34°C. After irradiation for the indicated time a spectrum of each sample was collected. For Uv-vis degradation studies, a  $5.0 \times 10^{-4}$  M THF solution of **1-Cl** was added to screw-top 2mm optical glass cuvette. The cuvette was then sealed with a J. Young valve, removed from the glovebox, and irradiated with a 34 W blue LED. After irradiation for the indicated time a spectrum was collected. Note that at room temperature no degradation was observed by Uv-vis after 24 h in the absence of light.

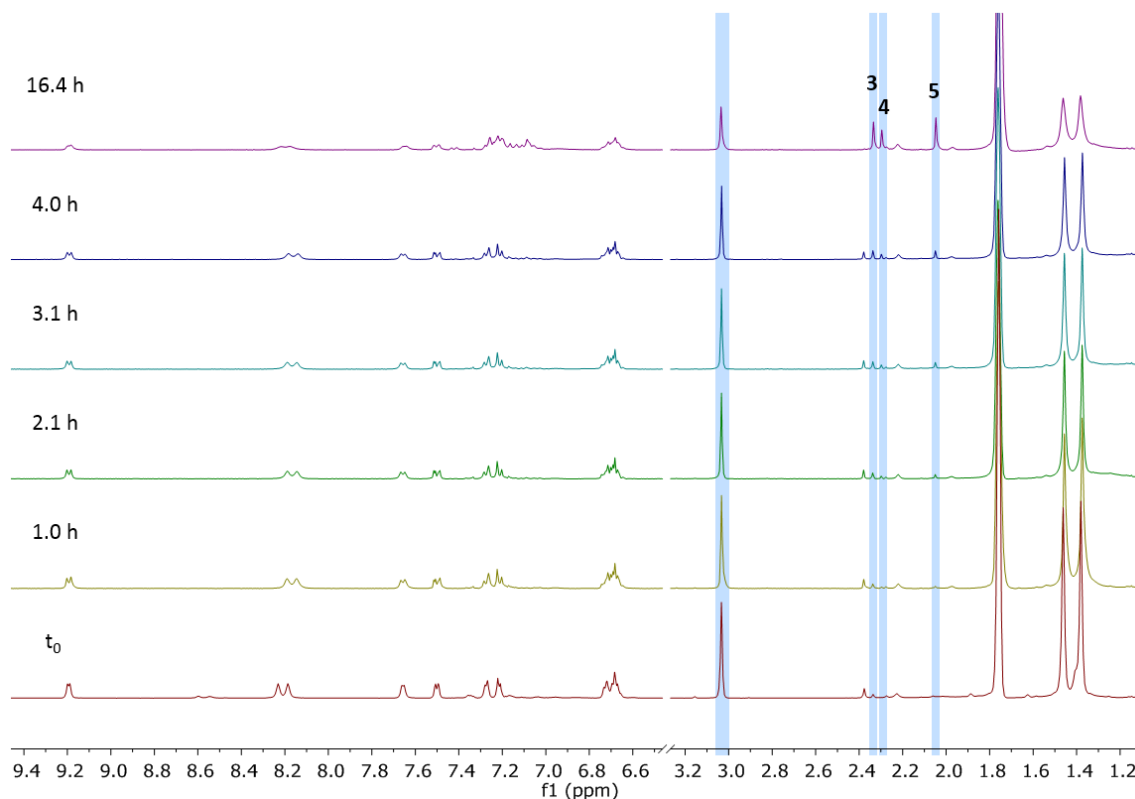

**Fig. S122.** Photolytic degradation of Ni(dtbbpy)(*o*-tolyl)Cl (**1-Cl**) at 34°C monitored via  $^1\text{H}$  NMR over 16.4 h of irradiation. Degradation of **1-Cl** was monitored by the disappearance of the methyl resonance associated with the *o*-tolyl ligand. The production of toluene (**3**), 2-(*o*-tolyl)tetrahydrofuran (**4**), and 2,2'-dimethyl-1,1'-biphenyl (**5**) products were detected via methyl resonances associated with the species.

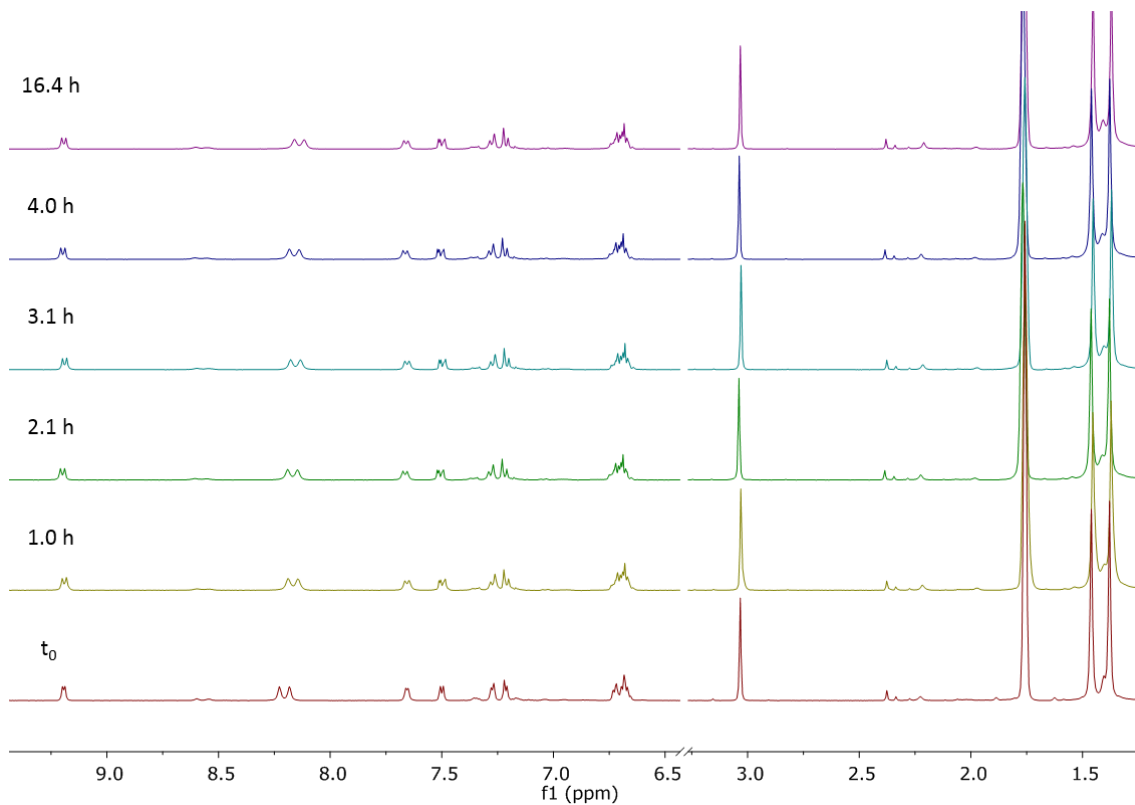

**Fig. S123.** Thermal degradation control for Ni(dtbbpy)(*o*-tolyl)Cl (**1-Cl**) monitored via  $^1\text{H}$  NMR over 16.4 h of heating at 34°C. Minimal degradation was detected.

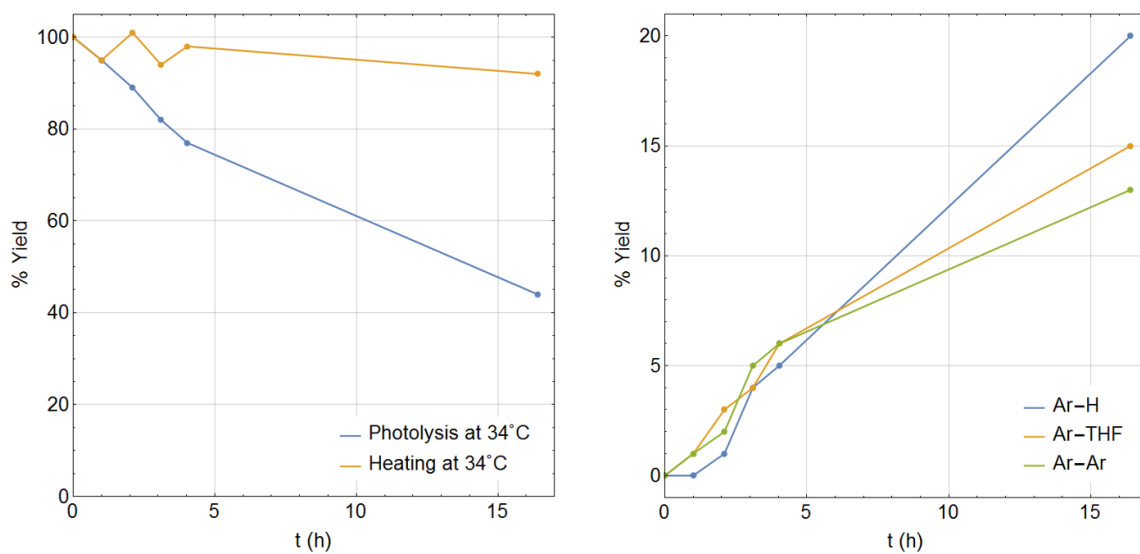

**Fig. S124.** Quantification of photolytic and thermal degradation (left). Quantification of organic photolytic degradation products (right).



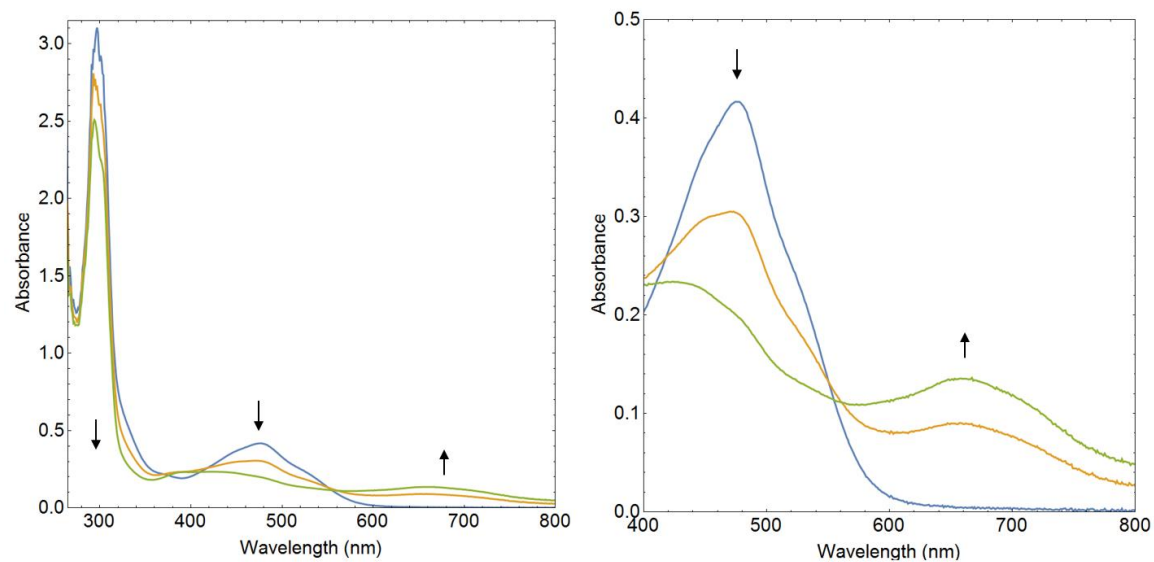

**Fig. S125.** Photolytic degradation of Ni(dtbbpy)(*o*-tolyl)Cl (**1-Cl**) at 34°C monitored via UV-vis over 3.25 h of irradiation. The spectra show the generation of unidentified species ( $\lambda_{\text{max}} = 660 \text{ nm}$ ) upon irradiation.

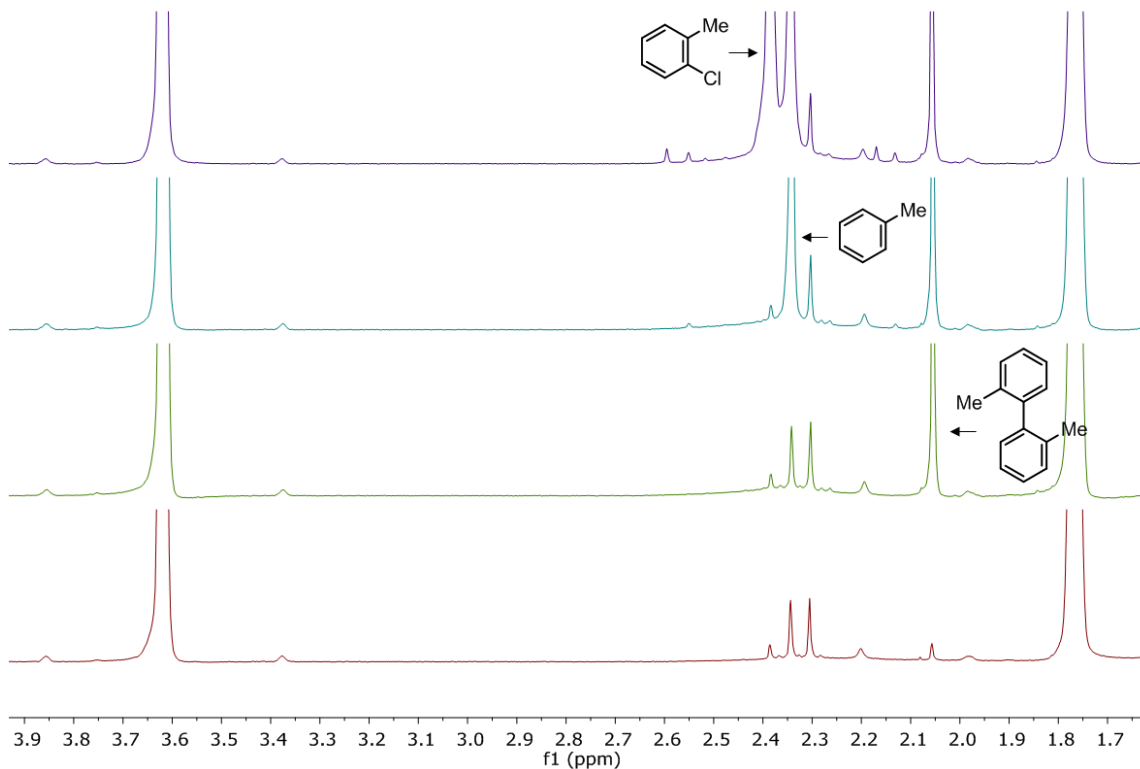

**Fig. S126.** In a separate photolytic degradation experiment the organic products toluene-d1 (**3**) and 2,2'-dimethyl-1,1'-biphenyl (**5**) were positively identified by spiking the crude reaction mixture (bottom) with a pure sample of the corresponding undeuterated compound. The organic product 2-(*o*-tolyl)tetrahydrofuran-d7 (**4**) was identified by comparison to the  $^1\text{H}$  NMR shift of 2-(*o*-tolyl)tetrahydrofuran-h7.

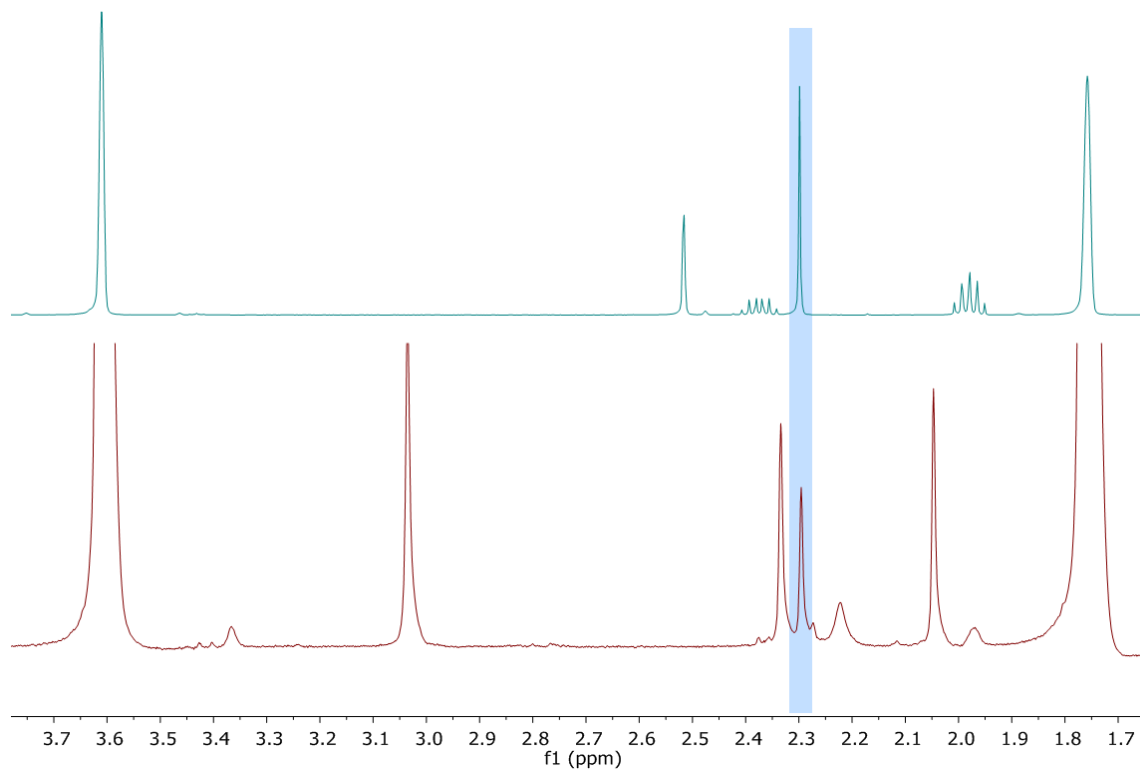

**Fig. S127.** The organic product 2-(*o*-tolyl)tetrahydrofuran- $\text{d}_7$  was identified by comparison to the  $^1\text{H}$  NMR spectrum of the 2-(*o*-tolyl)tetrahydrofuran- $\text{h}_7$  (top) in THF- $\text{d}_8$ .

## VIII. Redox Bracketing Studies

**Stoichiometric Oxidation Experiment.** A threaded 20 × 125 mm borosilicate reaction tube (Fisher part number: 14-959-37A) equipped with PTFE-coated stir bar was brought into a N<sub>2</sub>-filled glove box and charged with Ni(dtbbpy)(*o*-tolyl)Cl (11 mg, 0.025 mmol) followed by THF (9 mL) to give a ruby red solution. To a two dram vial was added ferrocenium tetrakis[3,5-bis(trifluoromethyl)phenyl]borate (FcBArF<sup>4</sup>, 26 mg, 0.025 mmol) followed by THF (3.5 mL) to give a turquoise solution. The reaction tube and vial were capped with Teflon septum caps, sealed with electrical tape and removed from the glove box. The Ni(dtbbpy)(*o*-tolyl)Cl solution was placed in a acetone/dry ice bath and set to stir (800 rpm) for 15 min. The FcBArF<sup>4</sup> solution was cooled in a acetone/dry ice bath. The cooled Ni(dtbbpy)(*o*-tolyl)Cl solution was irradiated with two 34 W blue LED lamps (5 cm away, placed 180° apart). The cooled FcBArF<sup>4</sup> solution was titrated drop wise via syringe into the Ni(dtbbpy)(*o*-tolyl)Cl solution. During the titration condensation was washed from the reaction tube with acetone. The reaction mixture changed from ruby red to light yellow after complete addition of the FcBArF<sup>4</sup>. After addition of FcBArF<sup>4</sup> was complete the reaction was warmed to room temperature and the crude product was analyzed by GC-FID relative to 1-fluoronaphthalene as an external standard.

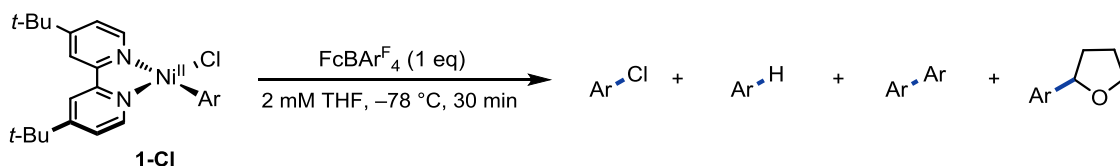

| Entry | Conditions    | Yield Ar-Cl | Yield Ar-H | Yield Ar-Ar | Yield Ar-THF |
|-------|---------------|-------------|------------|-------------|--------------|
| 1     | dark          | 50%         | 3%         | 0%          | 0%           |
| 2     | 34 W Blue LED | 12%         | 40%        | 2%          | 7%           |
| 3     | no oxidant    | 5%          | 2%         | 0%          | 0%           |

**Fig. S128.** Stoichiometric reactions of Ni(dtbbpy)(*o*-tolyl)Cl (**1-Cl**). Yields determined by GC-FID using 1-fluoronaphthalene as an external standard. Reactions were carried out at 0.025 mmol scale. Nickel complex contained trace aryl chloride remaining from synthesis which accounts for the small amount observed in the absence of oxidant.

## IX. Concentration Dependent Dynamics

Methods. All samples were dispensed in stock solutions prepared volumetrically inside a nitrogen filled glove box. In a typical experiment, THF and Ni(dtbbpy)(*o*-tolyl)Cl (**1-Cl**) dispensed in THF were added to 2 mm optical glass cuvette equipped with a J. Young valve and a magnetic stir bar. The cuvette was then sealed with a J. Young cap, removed from the glovebox, and an absorption spectrum was collected. Next the sample was set to stir and transient absorption spectra (400 nm photoexcitation, 1000  $\mu$ W) were collected. Extra care was taken to collect enough spectra such that after averaging the signal to noise gave narrow rate constant distributions (Figure S137). Rate constants were extracted by fitting experimental data between 470 nm and 600 nm (to avoid noise from pump scattering) after 1 ns pump-probe delay (to exclude early time dynamics) via global analysis using a single exponential decay. Rate constant distributions were generated according to the bootstrapping procedure outlined in the global analysis methods section (VI). The increase in optical density of the samples with concentration lead to requirement for additional scans to achieve sufficient averaging. After data collection was complete, the bootstrapped distributions were used to calculate standard error and confidence intervals for the rate constants (Table S15) used for kinetic modeling.

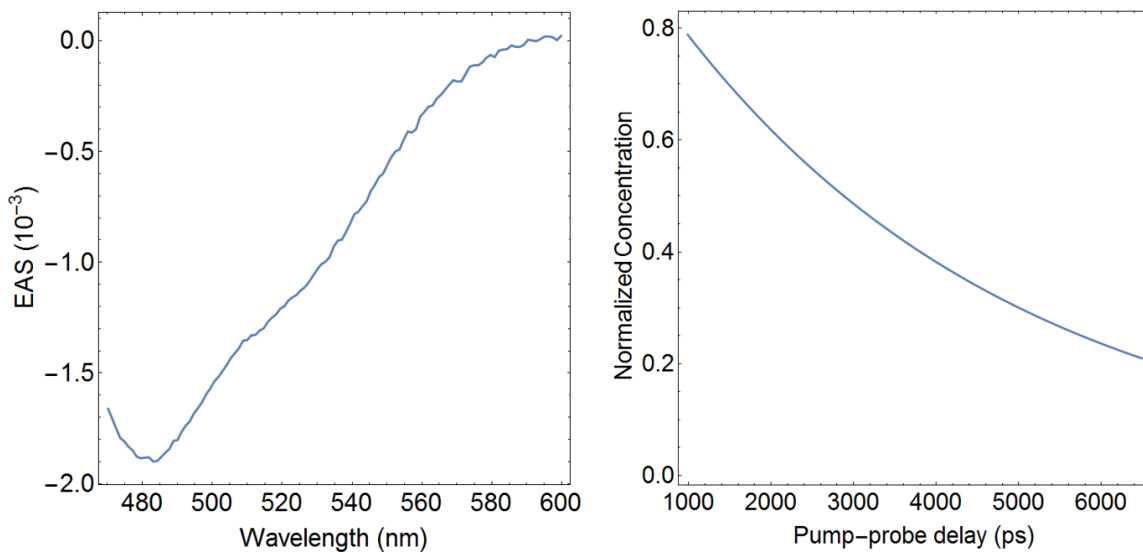

**Fig. S129.** Global analysis of Ni(dtbbpy)(*o*-tolyl)Cl concentration dependent transient absorption data (412 nm photoexcitation, 1000  $\mu$ W, 0.63 mM Ni, 237 scans). Evolution associated spectrum (left) and concentration profile (right).

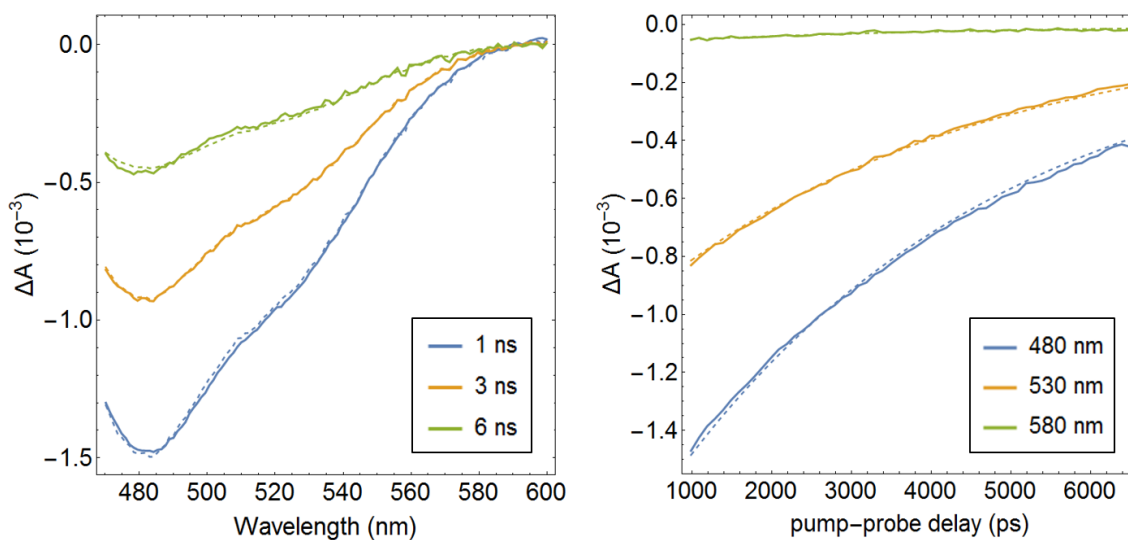

**Fig. S130.** Global analysis of Ni(dtbbpy)(*o*-tolyl)Cl concentration dependent transient absorption data (412 nm photoexcitation, 1000  $\mu$ W, 0.63 mM Ni, 237 scans). Comparison of experimental (solid) and fit (dashed) difference absorption spectra at select pump-probe delays (left) and single wavelength kinetics (right).

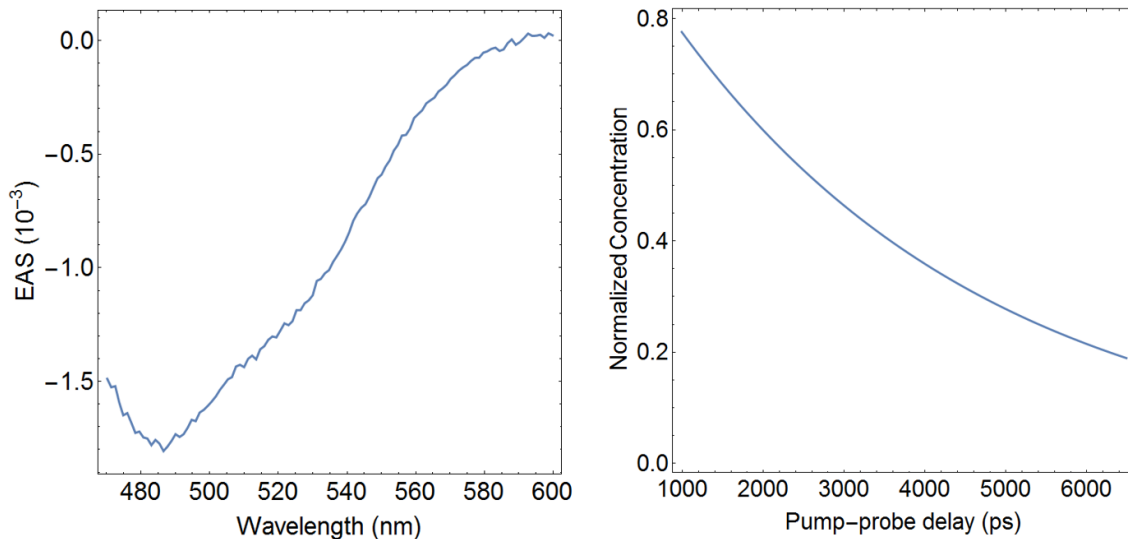

**Fig. S131.** Global analysis of Ni(dtbbpy)(*o*-tolyl)Cl concentration dependent transient absorption data (412 nm photoexcitation, 1000  $\mu$ W, 1.31 mM Ni, 113 scans). Evolution associated spectrum (left) and concentration profile (right).

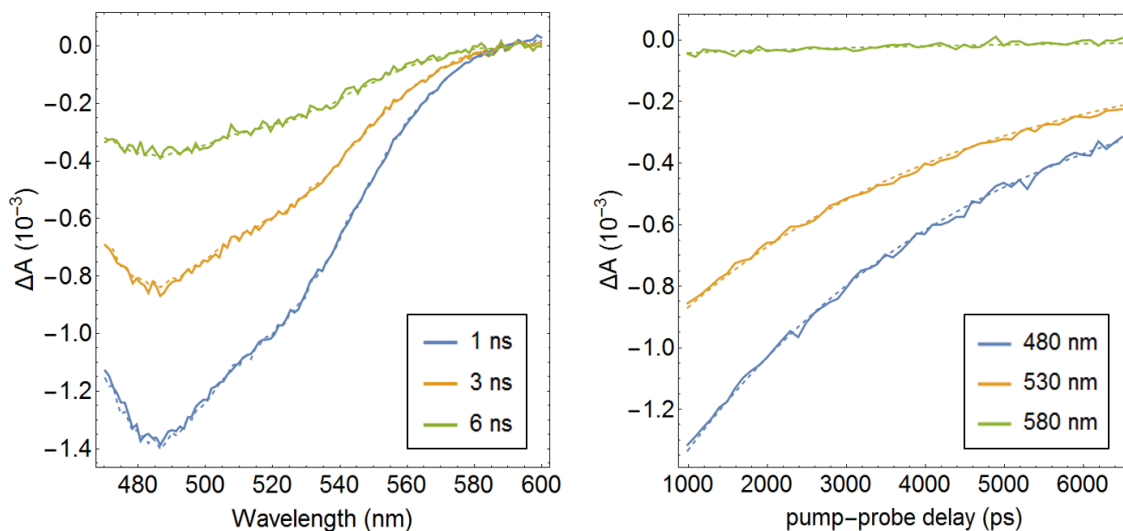

**Fig. S132.** Global analysis of Ni(dtbbpy)(*o*-tolyl)Cl concentration dependent transient absorption data (412 nm photoexcitation, 1000  $\mu$ W, 1.31 mM Ni, 113 scans). Comparison of experimental (solid) and fit (dashed) difference absorption spectra at select pump-probe delays (left) and single wavelength kinetics (right).

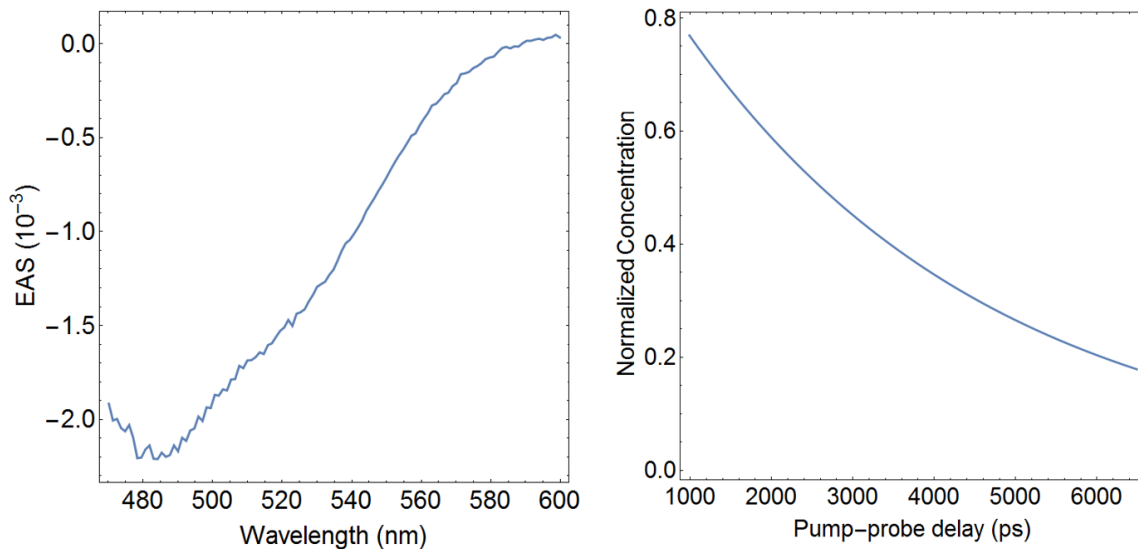

**Fig. S133.** Global analysis of Ni(dtbbpy)(*o*-tolyl)Cl concentration dependent transient absorption data (412 nm photoexcitation, 1000  $\mu$ W, 1.98 mM Ni, 181 scans). Evolution associated spectrum (left) and concentration profile (right).

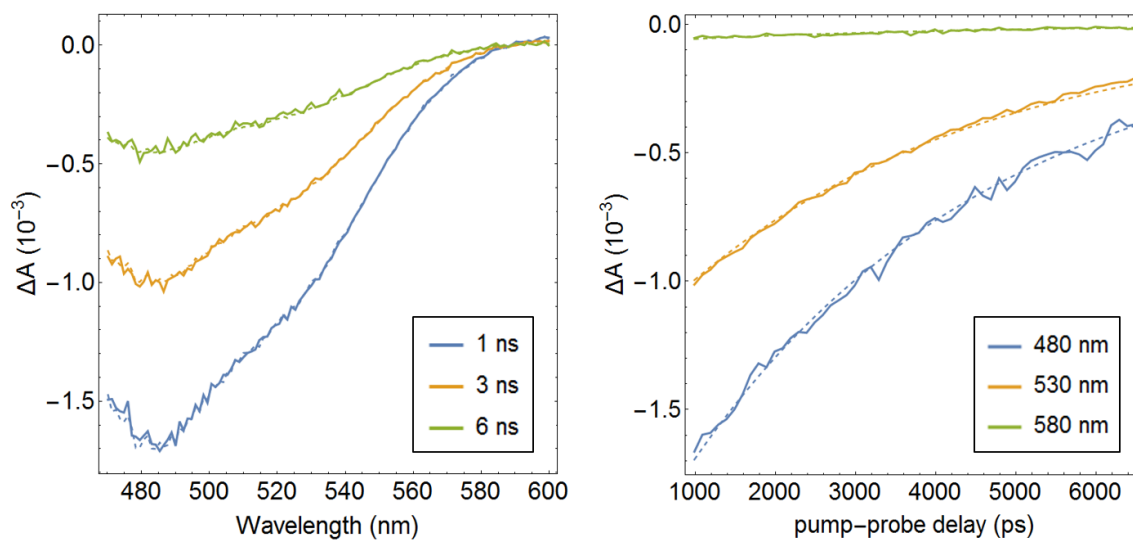

**Fig. S134.** Global analysis of Ni(dtbbpy)(*o*-tolyl)Cl concentration dependent transient absorption data (412 nm photoexcitation, 1000  $\mu$ W, 1.98 mM Ni, 181 scans). Comparison of experimental (solid) and fit (dashed) difference absorption spectra at select pump-probe delays (left) and single wavelength kinetics (right).



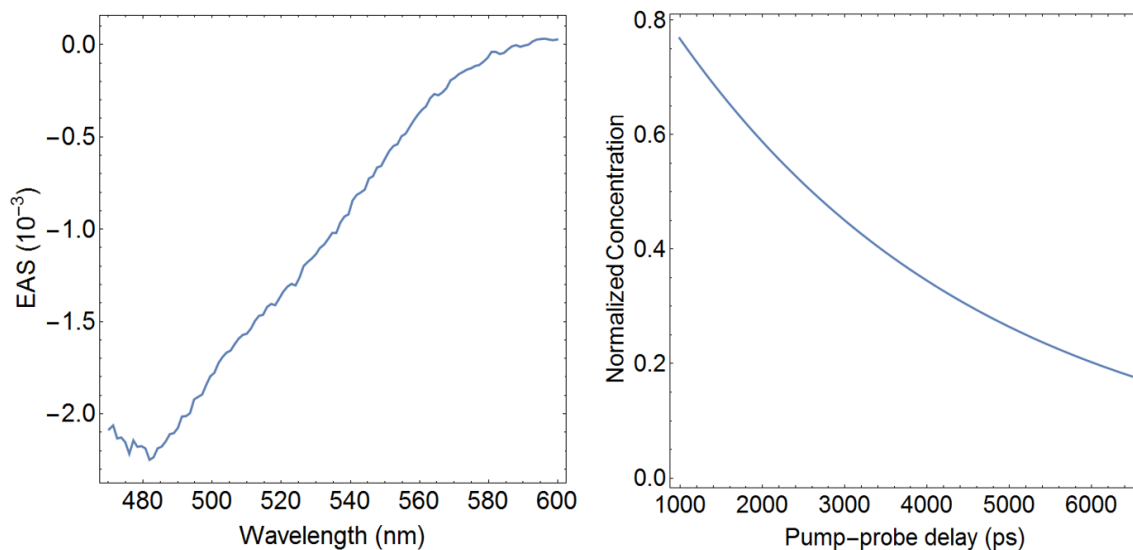

**Fig. S135.** Global analysis of Ni(dtbbpy)(*o*-tolyl)Cl concentration dependent transient absorption data (412 nm photoexcitation, 1000  $\mu$ W, 2.66 mM Ni, 587 scans). Evolution associated spectrum (left) and concentration profile (right).

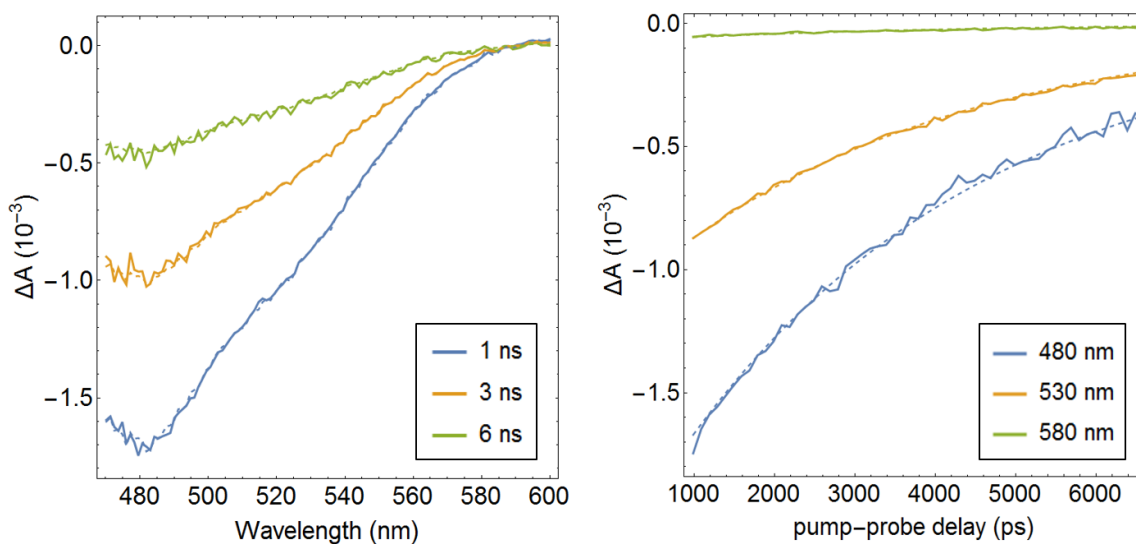

**Fig. S136.** Global analysis of Ni(dtbbpy)(*o*-tolyl)Cl concentration dependent transient absorption data (412 nm photoexcitation, 1000  $\mu$ W, 2.66 mM Ni, 587 scans). Comparison of experimental (solid) and fit (dashed) difference absorption spectra at select pump-probe delays (left) and single wavelength kinetics (right).

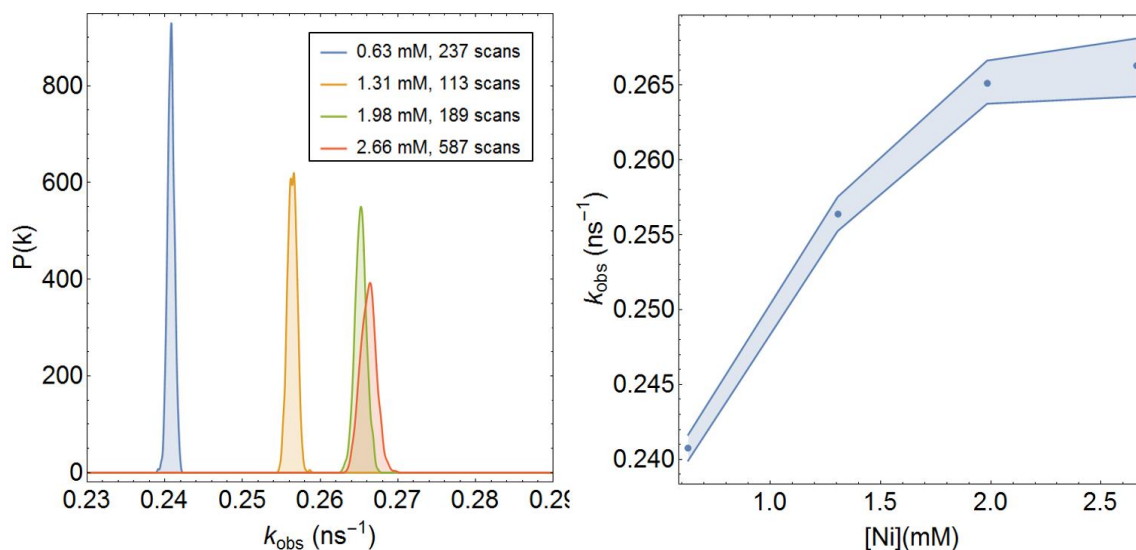

**Fig. S137.** Rate constant distributions (left) and [Ni] versus  $k_{\text{obs}}$  plot (right) for concentration dependent transient absorption experiments. The distribution shows smooth histograms representing the empirical rate constant distributions generated by bootstrap global analysis where the rate constants are plotted against the relative probability  $P(k)$  in arbitrary units.

| [Ni] (M)              | $k_{\text{obs}}$ ( $\text{ps}^{-1}$ ) | SE ( $\text{ps}^{-1}$ ) | $k_{\text{obs}}^{\text{m}}$ ( $\text{ps}^{-1}$ ) | $k_{\text{obs}}^{\text{m}} - t \times \text{SE}$ ( $\text{ps}^{-1}$ ) | $k_{\text{obs}}^{\text{m}} + t \times \text{SE}$ ( $\text{ps}^{-1}$ ) |
|-----------------------|---------------------------------------|-------------------------|--------------------------------------------------|-----------------------------------------------------------------------|-----------------------------------------------------------------------|
| $6.27 \times 10^{-4}$ | $2.41 \times 10^{-4}$                 | $4.41 \times 10^{-7}$   | $2.41 \times 10^{-4}$                            | $2.40 \times 10^{-4}$                                                 | $2.42 \times 10^{-4}$                                                 |
| $1.31 \times 10^{-3}$ | $2.56 \times 10^{-4}$                 | $5.81 \times 10^{-7}$   | $2.56 \times 10^{-4}$                            | $2.55 \times 10^{-4}$                                                 | $2.58 \times 10^{-4}$                                                 |
| $1.98 \times 10^{-3}$ | $2.65 \times 10^{-4}$                 | $7.35 \times 10^{-7}$   | $2.65 \times 10^{-4}$                            | $2.64 \times 10^{-4}$                                                 | $2.67 \times 10^{-4}$                                                 |
| $2.66 \times 10^{-3}$ | $2.66 \times 10^{-4}$                 | $9.90 \times 10^{-7}$   | $2.66 \times 10^{-4}$                            | $2.64 \times 10^{-4}$                                                 | $2.68 \times 10^{-4}$                                                 |

**Table S15.** Fitted rate constants for concentration dependent transient absorption experiments. Concentration ([Ni]) and rate constant from initial global analysis ( $k_{\text{obs}}$ ) are displayed with standard error (SE), bootstrap mean rate constant ( $k_{\text{obs}}^{\text{m}}$ ) and Studentized 95% ( $t = 1.96$ ) lower ( $k_{\text{obs}}^{\text{m}} - t \times \text{SE}$ ) and upper ( $k_{\text{obs}}^{\text{m}} + t \times \text{SE}$ ) confidence intervals. Note that  $k_{\text{obs}}$  was fit with a single exponential and thus given the units of a unimolecular rate constant.

**Kinetic Modeling.** For a bimolecular reaction, the observed rate of decay of the long-lived component, attributed to  $^3\text{MLCT}_1 \text{ Ni}$ , should display a Ni concentration dependence which in the limiting case of collisional quenching should take the form of a line with slope and intercept equal to the quenching rate constant and fundamental nonradiative decay rate respectively (Figure S138). Importantly, for a unimolecular decomposition reaction or reaction with solvent no concentration dependence is expected.

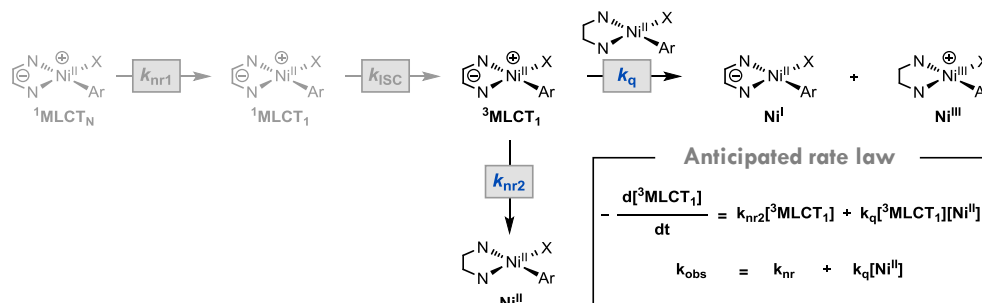

**Fig. S138.** Kinetics for photoinduced disproportionation via dynamic quenching pathway. A linear relationship between the concentration of Ni(dtbbpy)(*o*-tolyl)Cl (**1-Cl**) and  $k_{\text{obs}}$  is expected.

When the observed rate constant, fit using Global Analysis after 1 ns delay, is plotted against the concentration of Ni a clear concentration dependence is observed (Figure S137). However, the concentration dependence takes the form of a saturation curve rather than the line necessitated by collisional quenching. The observed negative deviation from linearity could be explained by a Michaelis-Menten-like saturation scheme (Figure S139) in which  $^3\text{MLCT}_1 \text{ Ni}$  (**c**) either associates with a ground state Ni(II) (**d**) to give excimer **e** or decays to the ground state. Next **e** could undergo charge separation to give ion pair **f** or decay to the ground state. Finally, **f** can either undergo back electron transfer to give two equivalents of **d** or dissociate to form a solvent separated ion pair towards the observed decomposition

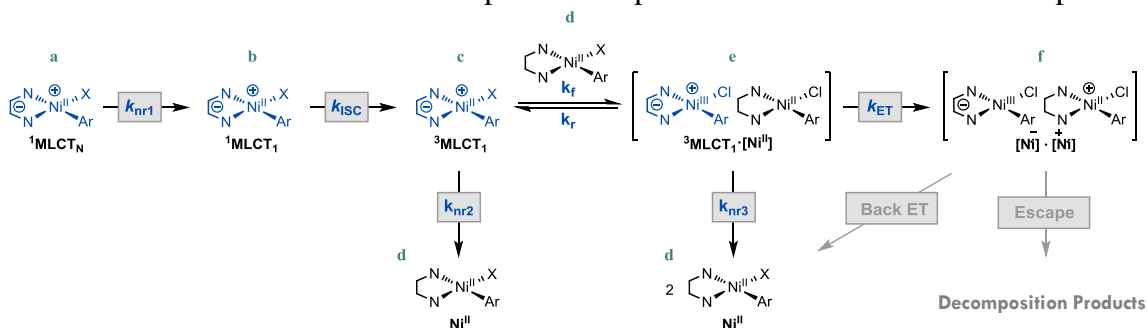

**Fig. S139.** Kinetics for photoinduced disproportionation via reversible association: Michaelis-Menten-like excited state kinetics.

products. To gauge the feasibility of this mechanism, a modeling approach was taken in which the rate law for the proposed pathway:

$$\frac{d[a]}{dt} = -k_{nr1}[a]$$

$$\frac{d[b]}{dt} = k_{nr1}[a] - k_{ISC}[b]$$

$$\frac{d[c]}{dt} = k_{ISC}[b] + k_r[e] - k_{nr2}[c] - k_f[c][d]$$

$$\frac{d[d]}{dt} = k_{nr2}[c] + 2k_{nr3}[e] + k_r[e] - k_f[c][d]$$

$$\frac{d[e]}{dt} = k_f[c][d] - k_r[e] - k_{nr3}[e] - k_{ET}[e]$$

$$\frac{d[f]}{dt} = k_{ET}[e]$$

was solved numerically at different initial concentrations of Ni and the resulting kinetics for the observable decay of **c** and **e** after 1 ns were fit with a single exponential decay, in a manner analogous to experimental data analysis, to generate a  $k_{obs}$  versus concentration plot.

The following is the algorithm and corresponding *Mathematica* code were used to carry out simulations:

1. Measured concentrations, corresponding  $k_{obs}$  from global analysis, and bootstrap confidence intervals were loaded into *Mathematica*. The concentration versus  $k_{obs}$  data was then interpolated to generate additional concentrations to aid in the visualization of simulation results.

```
experimental={{0.0006271186440677966,0.000240732},{0.001305084745762712,0.000256383},{0.001983050847457627,0.000265136},{0.002661016949152542,0.000266315}};
```

```
fitintervals={{0.0006271186440677966,0.000239918},{0.001305084745762712,0.00025525},{0.001983050847457627,0.000263757},{0.002661016949152542,0.000264235}},{0.0006271186440677966,0.000241646},{0.001305084745762712,0.000257529},{0.001983050847457627,0.000266637},{0.002661016949152542,0.000268114}};
```

```
low=fitintervals[[1]];
high=fitintervals[[2]];
```

```
experimentalinterpolation=Table[{t,Interpolation[experimental][t]},{t,0.0006271186440677966,0.002661016949152542,0.0006271186440677966/20}];
```

```
concentrations=Transpose[experimentalinterpolation][[1]];
```

2. The initial conditions and parameters for differential equations were then defined. Both  $k_{nr1}$  and  $k_{ISC}$  were approximated from the experimental data (rate constants are in units of  $ps^{-1}$ ). Note that by experimental design both corresponding components (a and b) are

no longer present at the pump-probe delay in which data analysis begins (after 1 ns). The initial population (in units of molarity) was approximated from the amplitude of the bleach after 1 ps pump-probe delay using a calibration curve and Beer's Law. The %population is then just the population divided by the measured total concentration of nickel. It was assumed that the %population was the same for each concentration. Note that all parameters were approximated from the data to best represent the observed kinetics though the exact values were not important for modeling and a fit could be found with different initial conditions.

```
knr1=5;
kISC=0.5;
population=2.06215*10^-5;
percentpopulation=population/0.0006271186440677966;
```

3. Next a simulation function dependent on the rate constants was written. Note that this was done to enable a fit to be found by rapid screening of rate constant combinations. The simulation starts from a pump-probe delay of  $t=0$  with the only species present being a and d with concentrations defined by the total concentration of Ni (taken from the interpolated concentrations in step 1) and %population. This function was solved from 0 to 7000 ps and gives a numerical solution to the system of differential equations defined by the specified rate constants ( $k_f$ ,  $k_r$ ,  $k_{nr2}$ ,  $k_{nr3}$ ,  $k_{ET}$ ) and concentration point (n).

```
Clear[knr2, knr3, kET, kr, kf];

sim[kf, kr, knr2, knr3, kET_] :=
NDSolve[{
a'[t] == -knr1*a[t],
b'[t] == knr1*a[t] - kISC*b[t],
c'[t] == kISC*b[t] - knr2*c[t] - kf*c[t]*d[t] + kr*e[t],
d'[t] == knr2*c[t] + 2knr3*e[t] + kr*e[t] - kf*c[t]*d[t],
e'[t] == kf*c[t]*d[t] - kr*e[t] - knr3*e[t] - kET*e[t],
f'[t] == kET*e[t],
a[0] == concentrations[[n]]*percentpopulation,
b[0] == 0,
c[0] == 0,
d[0] == concentrations[[n]] - concentrations[[n]]*percentpopulation,
e[0] == 0,
f[0] == 0
}, {a, b, c, d, e, f}, {t, 0, 7000}];
```

4. Rate constants were then selected, and a simulation was carried out with the first concentration point (n=1) to illustrate the results. Note that experimentally, the observable which is fit with global analysis is taken to be the total concentration of c and e. The kinetic scheme reproduces the observed saturation curve when a quasi-steady-state condition ( $k_f[c][d] \approx (k_r + k_r + k_{nr3})[e]$ ) is met. If this condition is satisfied, there are numerous sets of rate constants which reproduce the observed kinetics. Accordingly, the fitted rate constants should not be considered to represent true values. Rather the important fact to consider is whether the saturation scheme can reproduce the observed kinetics. This section of code gives the plots shown in figure S140.

```

kf=1.4;
kr=0.0006;
knr2=0.00019;
knr3=0.00027;
kET=0.000011;

values={kf,kr,knr2,knr3,kET};

n=1;
ss=sim[values[[1]],values[[2]],values[[3]],values[[4]],values[[5]]];

Show[
Plot[
{Evaluate[10^6*a[t]/.ss],10^6*Evaluate[b[t]/.ss],10^6*Evaluate[c[t]/.ss],10^6*Evaluate[e[t]/.ss
],10^6*Evaluate[c[t]/.ss]+10^6*Evaluate[e[t]/.ss],10^6*Evaluate[f[t]/.ss]},
{t,0,7000},
PlotLegends->{"a","b","c","e","c + e","f"},
Frame->True,
ImageSize->500,
PlotRange->Full,
GridLines->Automatic,
FrameStyle->Directive[Black,18],
AspectRatio->1,
FrameLabel->{"t (ps)","[Ni] (\[Mu]M)"}
],
Plot[
{(10^6*Evaluate[c[t]/.ss]+10^6*Evaluate[e[t]/.ss))-
0.25,(10^6*Evaluate[c[t]/.ss]+10^6*Evaluate[e[t]/.ss])+0.25},
{t,0,7000},
PlotStyle->Directive[ColorData[97,5],Opacity[0.1]],
Filling->{1->{2}}
]
]

Plot[
{Evaluate[10^6*a[t]/.ss],10^6*Evaluate[b[t]/.ss],10^6*Evaluate[c[t]/.ss],10^6*Evaluate[e[t]/.ss
],10^6*Evaluate[c[t]/.ss]+10^6*Evaluate[e[t]/.ss],10^6*Evaluate[f[t]/.ss]},
{t,0,10},
PlotLegends->{"a","b","c","e","c + e","f"},
Frame->True,
ImageSize->500,
PlotRange->Full,
GridLines->Automatic,
FrameStyle->Directive[Black,18],
AspectRatio->1,
FrameLabel->{"t (ps)","[Ni] (\[Mu]M)"}
]
]

```

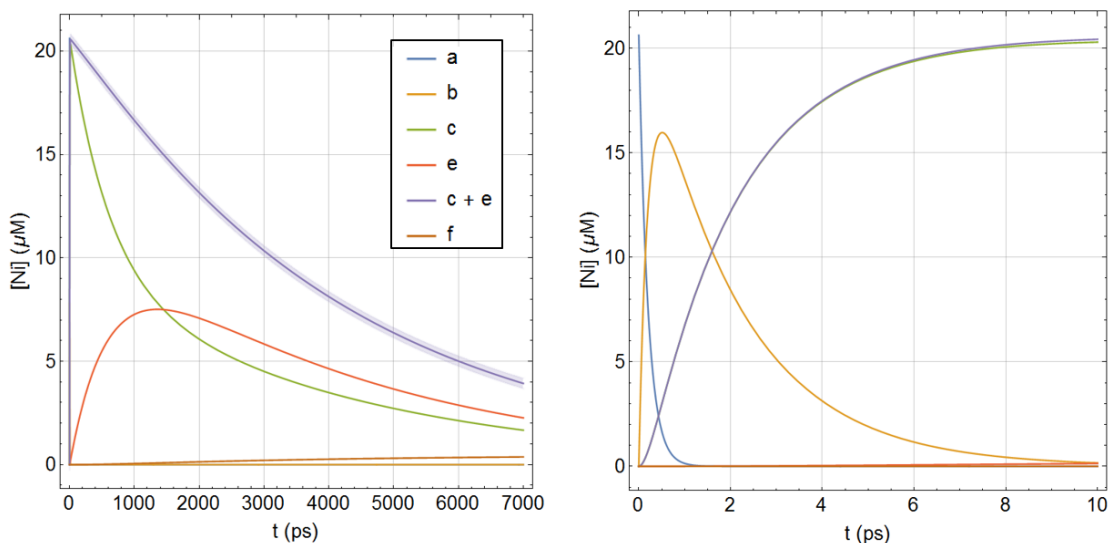

**Fig. S140.** Simulated kinetics for photoinduced disproportionation pathway. Initial conditions:  $[a]_{t=0} = [Ni] \times \%population$ ,  $[b]_{t=0} = 0$ ,  $[c]_{t=0} = 0$ ,  $[d]_{t=0} = [Ni] \times (1 - \%population)$ ,  $[e]_{t=0} = 0$ ,  $[f]_{t=0} = 0$ . Full time course (left) an initial dynamics (right).

- Next the numerical solution for the concentration of  $c$  and  $e$  (an interpolation function highlighted in purple in figure S140) was converted to a set of pump-probe delay ( $t$ ) versus concentration ( $c + e$ ) data points, the natural log of the concentration was taken, a linear regression of the  $t$  versus  $\ln(c + e)$  was carried out, and the initial concentration of nickel was paired with the resulting slope of the line. This process was carried out for each initial concentration of nickel (taken from the interpolated concentrations in step 1). Algorithmically, this was done in parallel by first generating a time versus concentration matrix for all initial concentration values and then carrying out the above analysis on each set.

```

simkin=
ParallelTable[
Module[{},
n=k;
ss=sim[values[[1]],values[[2]],values[[3]],values[[4]],values[[5]]];
Map[Flatten,Table[{t,(Evaluate[c[t]/.ss]+Evaluate[e[t]/.ss])},{t,1000,7000,100}]]
],
{k,1,Count[experimentalinterpolation,x_],1}
];

logger[{x_,y_}]:={x,Log[y]};
abs[{x_,y_}]:={x,Abs[y]};
simkinln=Table[Map[logger,Map[abs,simkin[[m]]]],{m,1,Count[simkin,x_],1}];
points=Thread[{concentrations,ParallelTable[Abs[LinearModelFit[simkinln[[m]],t,t]{"BestFitParameters"}][[2]]],{m,1,Count[simkin,x_],1}}];

```

- The raw output can then be visualized to qualitatively check for a fit with the interpolated experimental data. Finally, the simulated data can be plotted together with

the experimental data and bootstrap confidence intervals. The raw simulation output and processed plot can be seen in figure S141.

```
ListPlot[{points,experimentalinterpolation},
Frame->True,
GridLines->Automatic,
ImageSize->500,
FrameStyle->Directive[Black,18],
PlotStyle->{ColorData[97,2],ColorData[97,1]},
AspectRatio->1,
FrameLabel->{"[Ni] (M)","Subscript[k, obs] (ps^-1)"}]

Show[
ListPlot[
{1000*experimental,Null},
Frame->True,
GridLines->Automatic,
ImageSize->500,
FrameStyle->Directive[Black,18],
PlotStyle->{ColorData[97,2],ColorData[97,1]},
AspectRatio->1,
FrameLabel->{"[Ni] (mM)","Subscript[k, obs] (ns^-1)"},
PlotRange->{{0.6,2.7},{0.237,0.27}}
],
ListLinePlot[
{1000*low,1000*high},
PlotStyle->Directive[ColorData[97,2],Opacity[0.1]],
Filling->{1->{2}}
],
ListLinePlot[
{1000*points,Null},
PlotStyle->{Directive[Dashed,Thick],Directive[Thick]},
PlotLegends->{Style["Numerical Simulation",18],Style["Experimental and 95% Subscript[CI,
Fit]",18]}
]
]
```



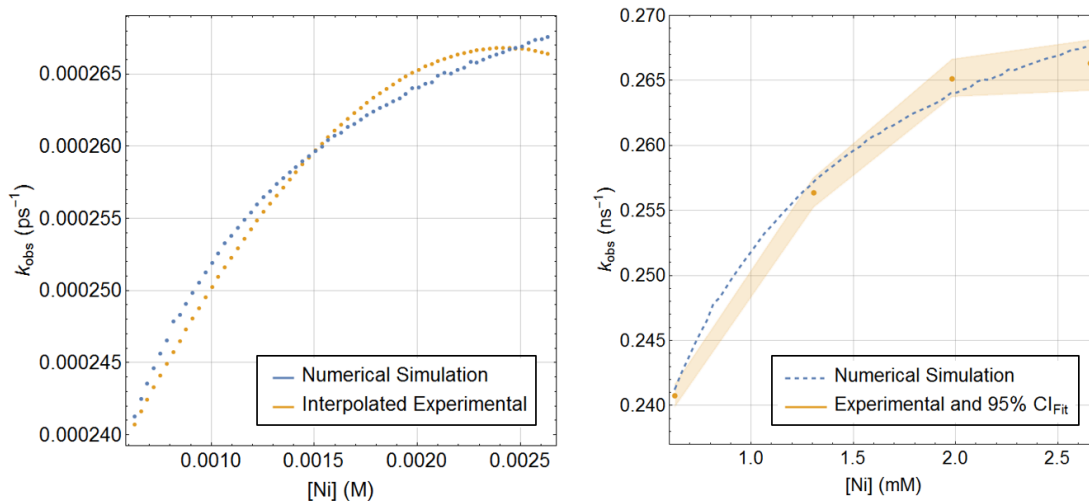

**Fig. S141.** Comparison of simulated and experimental concentration versus  $k_{\text{obs}}$  plots. Unprocessed simulation output (left) is plotted together with interpolated experimental data. Numerical simulation output (shown as an interpolated line rather than as individual points) is plotted against experimental data with 95% confidence intervals (right).

## X. C–O Coupling Experiments

Representative Procedure. A ½-dram vial (Fisher part number: 03-338AA) equipped with a PTFE-coated stir bar was brought into a N<sub>2</sub>-filled glove box and charged with K<sub>3</sub>PO<sub>4</sub> (21.2 mg, 0.1 mmol, 2 equiv.). To the reaction vial the following were added successively: a clear stock solution of 4-bromoacetophenone (10.0 mg, 0.05 mmol, 1 equiv) in THF (0.5 mL), and a dark purple solution of Ni(cod)<sub>2</sub> (1.4 mg, 5 μmol, 0.1 equiv.) and 4,4'-di-*tert*-butyl-2,2'-bipyridine (1.4 mg, 5 μmol, 0.1 equiv.) in THF (0.5 mL). The vial was capped with a Teflon septum cap and sealed with electrical tape. The reaction vial was removed from the glove box, set to stir (800 rpm) and irradiated with a blue LED array (Figure S142, cooled with both a fan above and pressurized air that was directed through tygon tubing mounted next to the reaction array) for 15 hours. The crude reaction was analyzed by GC-FID relative to 1-fluoronaphthalene as an external standard. Note: the authentic products 4'-butoxyacetophenone and 4,4'-diacetylbiphenyl were purchased from Sigma Aldrich and used to determine a response factors and retention times for GC-FID quantification.

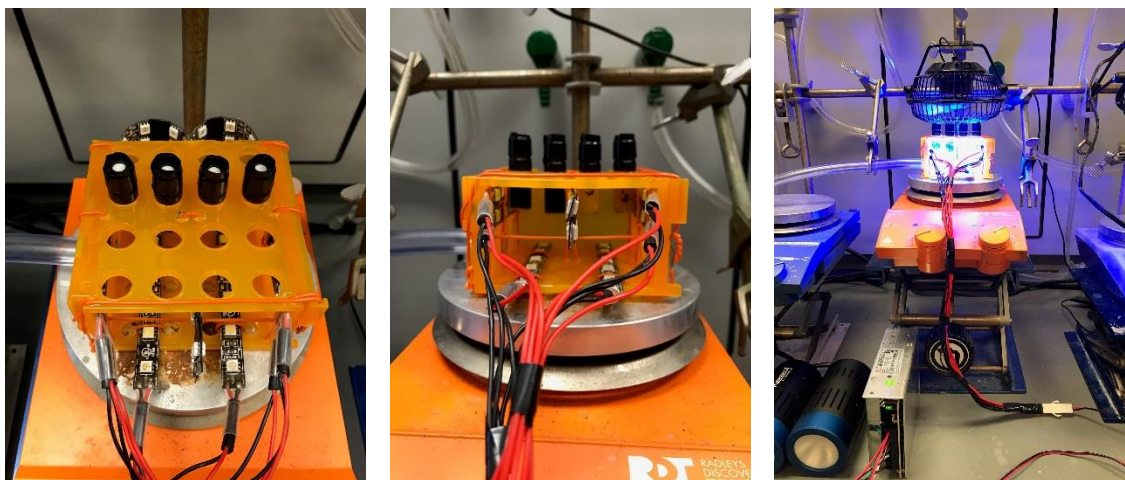

**Figure S142.** Example of a blue LED array used for small scale screening.

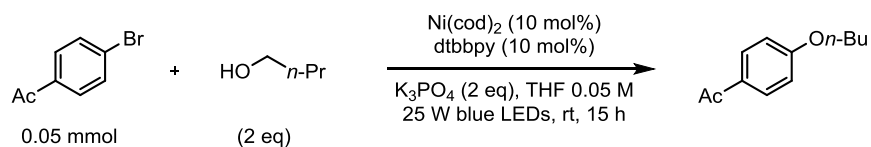

| Entry          | Control                           | Ar-Br Conversion | Ar-On-Bu Yield |
|----------------|-----------------------------------|------------------|----------------|
| 1 <sup>a</sup> | None                              | 47%              | 41%            |
| 2 <sup>a</sup> | Dark                              | 24%              | 18%            |
| 3              | No Ni/dtbbpy                      | 11%              | 0%             |
| 4              | No K <sub>3</sub> PO <sub>4</sub> | 13%              | 3%             |

**Fig. S143.** Initial discovery and controls for C–O coupling reaction. Yield and conversion determined by GC-FID using 1-fluoronaphthalene as an external standard. (a) Reactions ran for 19 h.

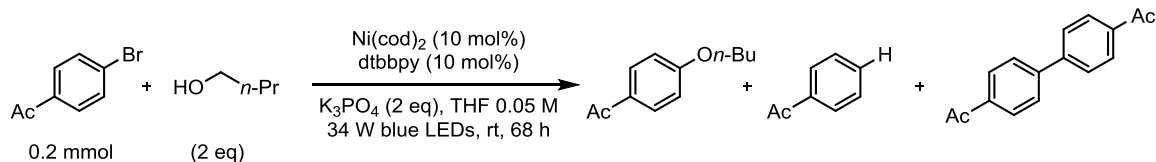

| Entry | Control | Ar-Br Conversion | Ar-On-Bu Yield | Ar-H Yield | Ar-Ar Yield |
|-------|---------|------------------|----------------|------------|-------------|
| 1     | None    | 100%             | 79%            | 5%         | 4%          |
| 2     | Dark    | 40%              | 26%            | 0%         | 0%          |

**Fig. S144.** Experiments with temperature control. Yield and conversion determined by GC-FID using 1-fluoronaphthalene as an external standard. The dark entry was taped with electrical tape, covered with foil, and placed in front of the 34 W blue LED lamp alongside the reaction. The temperature of both solutions was measured to be 27°C after 68 h of irradiation.

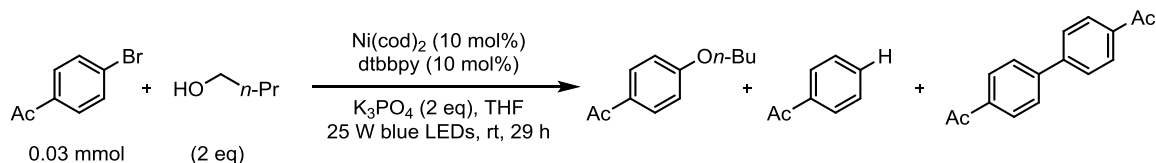

| Entry | [Ar-Br] (M) | Ar-Br Conversion | Ar-On-Bu Yield | Ar-H Yield | Ar-Ar Yield |
|-------|-------------|------------------|----------------|------------|-------------|
| 1     | 0.025       | 49%              | 27%            | 1%         | 2%          |
| 2     | 0.05        | 67%              | 49%            | 1%         | 3%          |
| 3     | 0.10        | 75%              | 57%            | 0%         | 3%          |

**Fig. S145.** Concentration dependence. Yield and conversion determined by GC-FID using 1-fluoronaphthalene as an external standard. The reaction showed a significant concentration dependence, consistent with photoinduced disproportionation hypothesis.

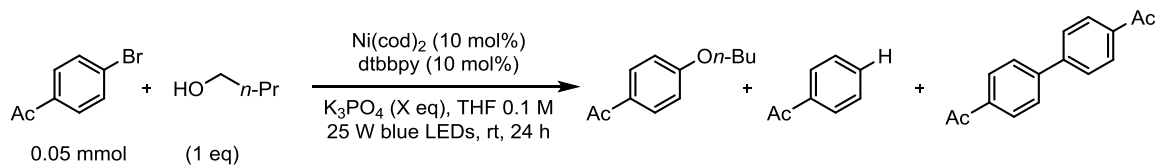

| Entry | K <sub>3</sub> PO <sub>4</sub> | Ar-Br Conversion | Ar-On-Bu Yield | Ar-H Yield | Ar-Ar Yield |
|-------|--------------------------------|------------------|----------------|------------|-------------|
| 1     | 1 eq                           | 52%              | 32%            | 1%         | 3%          |
| 2     | 2 eq                           | 76%              | 56%            | 1%         | 4%          |
| 3     | 3 eq                           | 88%              | 67%            | 1%         | 7%          |

**Fig. S146.** Base equivalents screen. Yield and conversion determined by GC-FID using 1-fluoronaphthalene as an external standard.

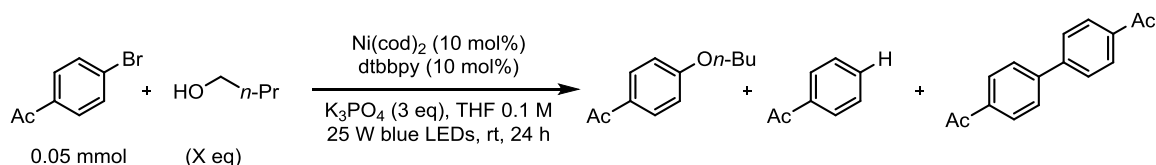

| Entry | <i>n</i> -BuOH | Ar-Br Conversion | Ar-On-Bu Yield | Ar-H Yield | Ar-Ar Yield |
|-------|----------------|------------------|----------------|------------|-------------|
| 1     | 1 eq           | 88%              | 67%            | 1%         | 7%          |
| 2     | 1.5 eq         | 91%              | 74%            | 1%         | 5%          |
| 3     | 2 eq           | 92%              | 75%            | 1%         | 4%          |

**Fig. S147.** Alcohol equivalents screen. Yield and conversion determined by GC-FID using 1-fluoronaphthalene as an external standard.

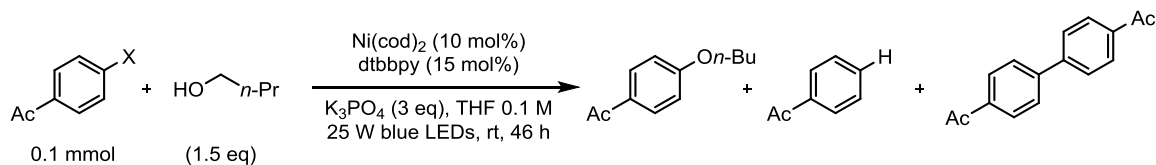

| Entry          | X  | Ar-X Conversion | Ar-On-Bu Yield | Ar-H Yield | Ar-Ar Yield |
|----------------|----|-----------------|----------------|------------|-------------|
| 1              | Cl | 38%             | 4%             | 0%         | 10%         |
| 2 <sup>a</sup> | Br | 100%            | 80%            | 1%         | 14%         |
| 3              | I  | 100%            | 79%            | 0%         | 6%          |

**Fig. S148.** Halide screen. Yield and conversion determined by GC-FID using 1-fluoronaphthalene as an external standard. The observed reactivity correlates with the expected ability of Ni(I)(dtbbpy)(*On*-Bu) to undergo oxidative addition. (a) Reaction was run for 44 h.

**Discussion.** We considered possible mechanisms for the observed C–O coupling reaction with emphasis on mechanisms that could explain both the observed thermal and photochemical outcomes (Figure S138). Preliminary data collected from computational and optimization studies is most consistent with the mechanism outlined in figure S149. Computational studies suggest that reductive elimination from a Ni(II) aryl alkoxide complex is not thermodynamically feasible with a computed free energy change of +45 kcal mol<sup>-1</sup> (Figure S34). In contrast, reductive elimination from a Ni(III) aryl alkoxide complex **I** to give the observed C–O coupling product and Ni(I) species **G** was computed to be exergonic with a free energy change of -39 kcal mol<sup>-1</sup> (Figure S33). Subsequent ligand exchange would result in the generation of Ni(I) alkoxide complex **H** which could then undergo oxidative addition to regenerate **I** (approximately thermoneutral:  $\Delta G = +4$  kcal mol<sup>-1</sup>, Figure S35) to turn over the catalytic cycle.

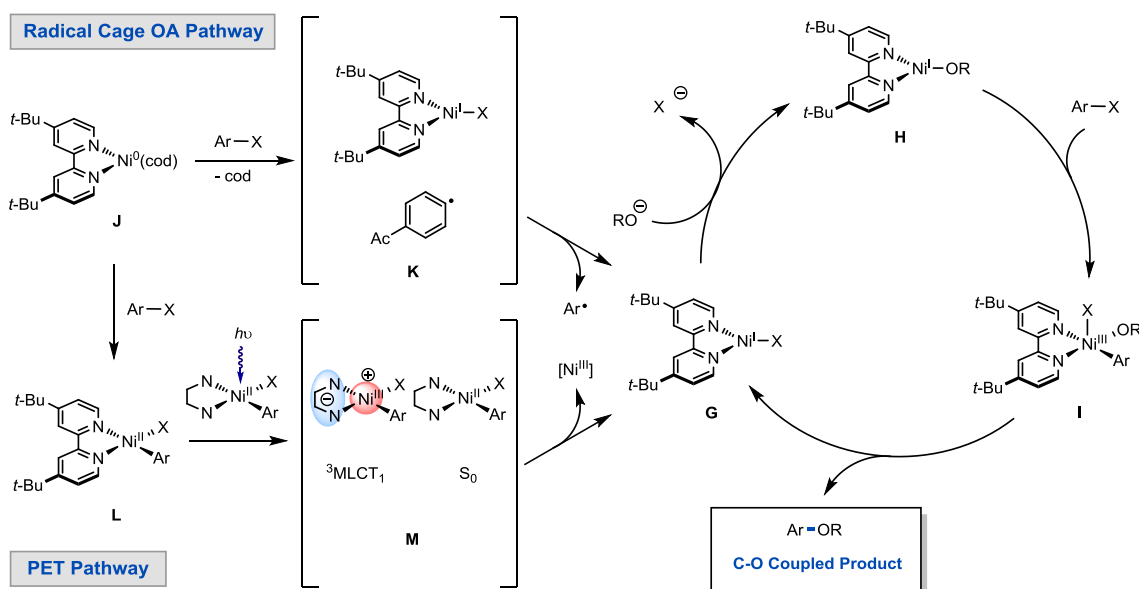

**Fig. S149.** Proposed catalytic cycle.

It is well known that oxidative addition of aryl halides to Ni(0) proceeds via a radical cage pathway, either undergoing cage collapse to generate Ni(II) aryl halide complexes or cage escape to generate Ni(I) and an aryl radical.<sup>42</sup> Starting from Ni(0) precatalyst **J**, oxidative addition via the radical cage escape mechanism could account for the observed product formation in the absence of light by generation of on cycle Ni(I) species **G**. However, only a fraction of oxidative addition steps would result in the generation of Ni(I) while the remainder would result in the generation of Ni(II) aryl halide complex **L**. By analogy to the photophysics Ni(II)(*o*-tolyl) halide complexes studied in this manuscript, irradiation of **L** should generate <sup>3</sup>MLCT Ni(II) which could then engage in bimolecular electron transfer with ground state Ni(II) to give a Ni(III) complex and on cycle Ni(I) complex **G**. Note that the Ni(III) Aryl halide complex generated in this way could undergo reductive elimination of Ar–X, providing an additional equivalent of on cycle Ni(I) without actually consuming aryl halide. Therefore, photoinitiation of a thermal Ni(I)/Ni(III) C–O catalytic cycle could account for the significant increase reaction efficiency observed upon irradiation. It is

noteworthy that preliminary optimization studies are consistent with this proposal: (1) increased reaction efficiency was observed with increasing concentration (Figure S145) and (2) 4-iodoacetophenone and 4-bromoacetophenone efficiently provided aryl alkoxide product while 4-chloroacetophenone performed poorly (the expected rate of Ni(I) oxidative addition is  $\text{Ar-I} > \text{Ar-Br} > \text{Ar-Cl}$ ).<sup>42</sup>

## XI. LED Emission Spectrum

Emission spectra were measured on a digital spectrometer with optical fiber (Ocean Optics USB4000).

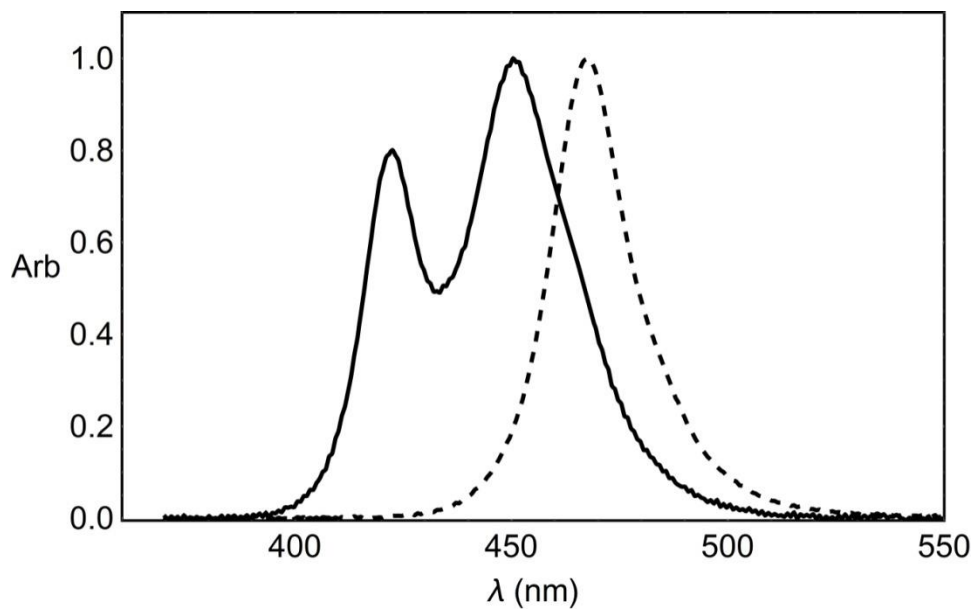

**Fig. S150.** Normalized emission spectra for light sources. Emission spectrum from a 25W blue LED array shown as dashed line with emission maximum at  $\lambda_{\text{max}} = 467$  nm. Emission spectrum from a 34 W blue Kessil Lamp shown as solid line with emission maximum at  $\lambda_{\text{max}} = 450$  nm flanked by a second peak at  $\lambda = 422$  nm.

## XII. Electrochemical MLCT Assignment

Computational studies of Ni(dtbbpy)(*o*-tolyl)Cl (**1-Cl**) led to the assignment of the first singlet transition at 634 nm to a MLCT. Electronic structure calculations suggest that the HOMO and LUMO of **1-Cl** are Ni-centered ( $d_{z^2}$  parentage) and dtbbpy- $\pi^*$ -centered respectively. Therefore, according to the square scheme presented in figure S151 the band gap between the first reduction and oxidation of **1-Cl** provides a good approximation of the expected  $^1\text{MLCT}_1$  transition energy. Electrochemical peak potentials for Ni(dtbbpy)(*o*-tolyl)Cl (**1-Cl**) were measured via cyclic voltammetry in a previous study.<sup>22</sup>

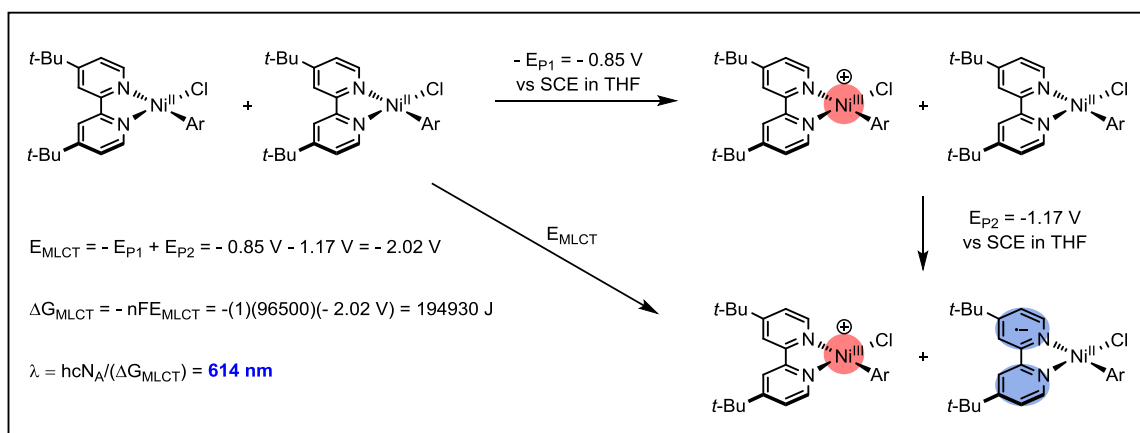

**Fig. S151.** Thermodynamic cycle for calculation of  $^1\text{MLCT}_1$  transition energy via electrochemical peak potentials.



### XIII. References

1. Nozik, A. J.; Miller, J. *Chem. Rev.* **2010**, *110*, 6443.
2. Grätzel, M. *Inorg Chem* **2005**, *44*, 6841.
3. Morris, A. J.; Meyer, G. J.; Fujita, E. *Acc. Chem. Res.* **2009**, *42*, 1983.
4. Esswein, A. J.; Nocera, D. G. *Chem. Rev.* **2007**, *107*, 4022.
5. Willkomm, J.; Orchard, K. L.; Reynal, A.; Pastor, E.; Durrant, J. R.; Reisner, E. *Chem. Soc. Rev.* **2016**, *45*, 9.
6. Romero, N. A.; Nicewicz, D. A. *Chem. Rev.* **2016**, *116*, 10075.
7. Prier, C. K.; Rankic, D. A.; MacMillan, D. W. *Chem. Rev.* **2013**, *113*, 5322.
8. Tucker, J. W.; Stephenson, C. R. *J. Org. Chem.* **2012**, *77*, 1617.
9. Schultz, D. M.; Yoon, T. P. *Science* **2014**, *343*, 1239176.
10. Kavarnos, G. J.; Turro, N. J. *Chem. Rev.* **1986**, *86*, 401.
11. Arias-Rotondo, D. M.; McCusker, J. K. *Chem. Soc. Rev.* **2016**, *45*, 5803.
12. Kalyanasundaram, K. *Coord. Chem. Rev.* **1982**, *46*, 159.
13. Liu, Y.; Persson, P.; Sundstrom, V.; Warnmark, K. *Acc. Chem. Res.* **2016**, *49*, 1477.
14. Scaltrito, D. V.; Thompson, D. W.; O'Callaghan, J. A.; Meyer, G. J. *Coord. Chem. Rev.* **2000**, *208*, 243.
15. Higgins, R. F.; Fatur, S. M.; Shepard, S. G.; Stevenson, S. M.; Boston, D. J.; Ferreira, E. M.; Damrauer, N. H.; Rappe, A. K.; Shores, M. P. *J. Am. Chem. Soc.* **2016**, *138*, 5451.
16. Creutz, S. E.; Lotito, K. J.; Fu, G. C.; Peters, J. C. *Science* **2012**, *338*, 647.
17. Balzani, V.; Bergamini, G.; Campagna, S.; Puntoriero, F. *Top. Curr. Chem.* **2007**, *280*, 1.
18. Caspar, J. V.; Meyer, T. J. *J. Am. Chem. Soc.* **1983**, *105*, 5583.
19. Cannizzo, A.; Milne, C. J.; Consani, C.; Gawelda, W.; Bressler, C.; van Mourik, F.; Chergui, M. *Coord. Chem. Rev.* **2010**, *254*, 2677.
20. Zuo, Z.; Ahneman, D. T.; Chu, L.; Terrett, J. A.; Doyle, A. G.; MacMillan, D. W. C. *Science* **2014**, *345*, 437.
21. Tellis, J. C.; Primer, D. N.; Molander, G. A. *Science* **2014**, *345*, 433.
22. Shields, B. J.; Doyle, A. G. *J. Am. Chem. Soc.* **2016**, *138*, 12719.
23. Heitz, D. R.; Tellis, J. C.; Molander, G. A. *J. Am. Chem. Soc.* **2016**, *138*, 12715.
24. Chergui, M. *Acc. Chem. Res.* **2015**, *48*, 801.
25. Powers, D. C.; Anderson, B. L.; Nocera, D. G. *J. Am. Chem. Soc.* **2013**, *135*, 18876.
26. Lockwood, G.; McGarvey, J. J.; Devonshire, R. *Chem. Phys. Lett.* **1982**, *86*, 127.
27. Hwang, S. J.; Powers, D. C.; Maher, A. G.; Anderson, B. L.; Hadt, R. G.; Zheng, S. L.; Chen, Y. S.; Nocera, D. G. *J. Am. Chem. Soc.* **2015**, *137*, 6472.
28. Klein, A.; Kaiser, A.; Wielandt, W.; Belaj, F.; Wendel, E.; Bertagnolli, H.; Zalis, S. *Inorg. Chem.* **2008**, *47*, 11324.
29. Biswas, S.; Weix, D. J. *J. Am. Chem. Soc.* **2013**, *135*, 16192.
30. Frei, F.; Rondi, A.; Espa, D.; Mercuri, M. L.; Pilia, L.; Serpe, A.; Odeh, A.; Van Mourik, F.; Chergui, M.; Feurer, T.; Deplano, P.; Vlcek, A.; Cannizzo, A. *Dalton Trans.* **2014**, *43*, 17666.
31. Noviandri, I.; Brown, K. N.; Fleming, D. S.; Gulyas, P. T.; Lay, P. A.; Masters, A. F.; Phillips, L. *J. Phys. Chem. B.* **1999**, *103*, 6713.
32. Brown, K. E.; Salamant, W. A.; Shoer, L. E.; Young, R. M.; Wasielewski, M. R. *J.*

- Phys. Chem. Lett.* **2014**, *5*, 2588.
33. Ishida, N.; Masuda, Y.; Ishikawa, N.; Murakami, M. *Asian J. Org. Chem.* **2017**, *6*, 669.
34. Welin, E. R.; Le, C.; Arias-Rotondo, D. M.; McCusker, J. K.; MacMillan, D. W. C. *Science* **2017**, *355*, 380.
35. Frisch, M. J.; Trucks, G. W.; Schlegel, H. B.; Scuseria, G. E.; Robb, M. A.; Cheeseman, J. R.; Scalmani, G.; Barone, V.; Mennucci, B.; Petersson, G. A.; Nakatsuji, H.; Caricato, M.; Li, X.; Hratchian, H. P.; Izmaylov, A. F.; Bloino, J.; Zheng, G.; Sonnenberg, J. L.; Hada, M.; Ehara, M.; Toyota, K.; Fukuda, R.; Hasegawa, J.; Ishida, M.; Nakajima, T.; Honda, Y.; Kitao, O.; Nakai, H.; Vreven, T.; Montgomery, J. A., Jr.; Peralta, J. E.; Ogliaro, F.; Bearpark, M.; Heyd, J. J.; Brothers, E.; Kudin, K. N.; Staroverov, V. N.; Keith, T.; Kobayashi, R.; Normand, J.; Raghavachari, K.; Rendell, A.; Burant, J. C.; Iyengar, S. S.; Tomasi, J.; Cossi, M.; Rega, N.; Millam, J. M.; Klene, M.; Knox, J. E.; Cross, J. B.; Bakken, V.; Adamo, C.; Jaramillo, J.; Gomperts, R.; Stratmann, R. E.; Yazyev, O.; Austin, A. J.; Cammi, R.; Pomelli, C.; Ochterski, J. W.; Martin, R. L.; Morokuma, K.; Zakrzewski, V. G.; Voth, G. A.; Salvador, P.; Dannenberg, J. J.; Dapprich, S.; Daniels, A. D.; Farkas, O.; Foresman, J. B.; Ortiz, J. V.; Cioslowski, J.; Fox, D. J. Gaussian 09, revision D.01; Gaussian, Inc.: Wallingford, CT, 2009.
36. Frisch, M. J.; Trucks, G. W.; Schlegel, H. B.; Scuseria, G. E.; Robb, M. A.; Cheeseman, J. R.; Scalmani, G.; Barone, V.; Petersson, G. A.; Nakatsuji, H.; Li, X.; Caricato, M.; Marenich, A. V.; Bloino, J.; Janesko, B. G.; Gomperts, R.; Mennucci, B.; Hratchian, H. P.; Ortiz, J. V.; Izmaylov, A. F.; Sonnenberg, J. L.; Williams-Young, D.; Ding, F.; Lipparini, F.; Egidi, F.; Goings, J.; Peng, B.; Petrone, A.; Henderson, T.; Ranasinghe, D.; Zakrzewski, V. G.; Gao, J.; Rega, N.; Zheng, G.; Liang, W.; Hada, M.; Ehara, M.; Toyota, K.; Fukuda, R.; Hasegawa, J.; Ishida, M.; Nakajima, T.; Honda, Y.; Kitao, O.; Nakai, H.; Vreven, T.; Throssell, K.; Montgomery, J. A., Jr.; Peralta, J. E.; Ogliaro, F.; Bearpark, M. J.; Heyd, J. J.; Brothers, E. N.; Kudin, K. N.; Staroverov, V. N.; Keith, T. A.; Kobayashi, R.; Normand, J.; Raghavachari, K.; Rendell, A. P.; Burant, J. C.; Iyengar, S. S.; Tomasi, J.; Cossi, M.; Millam, J. M.; Klene, M.; Adamo, C.; Cammi, R.; Ochterski, J. W.; Martin, R. L.; Morokuma, K.; Farkas, O.; Foresman, J. B.; Fox, D. J. Gaussian 16, Revision A.03; Gaussian, Inc., Wallingford CT, 2016.
37. Niehaus, T. A.; Hofbeck, T.; Yersin, H. *RSC Adv.* **2015**, *5*, 63318.
38. Nguyen, K. A.; Kennel, J. J. *J. Chem. Phys.* **2002**, *117*, 7128.
39. Lakowicz, J. R. Principles of Fluorescence Spectroscopy; Kluwer Academic/ Plenum Publishers: New York, 1999.
40. Mullen, K. M.; van Stokkum, I. H. M. *J. Stat. Software* **2007**, *18*, 3.
41. Snellenburg, J. J.; Laptanok, S.; Seger, R.; Mullen, K. M.; van Stokkum, I. H. M. *J. Stat. Software* **2012**, *49*, 3.
42. Tsou, T. T.; Kochi, J. K. *J. Am. Chem. Soc.* **1979**, *101*, 6319.

## XIV. NMR Spectra

NMR data. Chemical shifts for protons are reported in parts per million downfield from tetramethylsilane and are referenced to residual protium in the NMR solvent (DCM =  $\delta$  5.32 ppm, THF =  $\delta$  1.73 and 3.58 ppm). Chemical shifts for carbon are reported in parts per million downfield from tetramethylsilane and are referenced to the carbon resonances of the solvent residual peak (DCM- $d_2$  =  $\delta$  54.0 ppm, THF =  $\delta$  25.4 and 67.6 ppm). NMR data are represented as follows: chemical shift ( $\delta$  ppm), multiplicity (s = singlet, d = doublet, t = triplet, q = quartet, p = pentet, m = multiplet), coupling constant in Hertz (Hz), integration.

**<sup>1</sup>H NMR (501 MHz, DCM-d2): Ni(dtbbpy)(*o*-tolyl)Cl (1-Cl)**

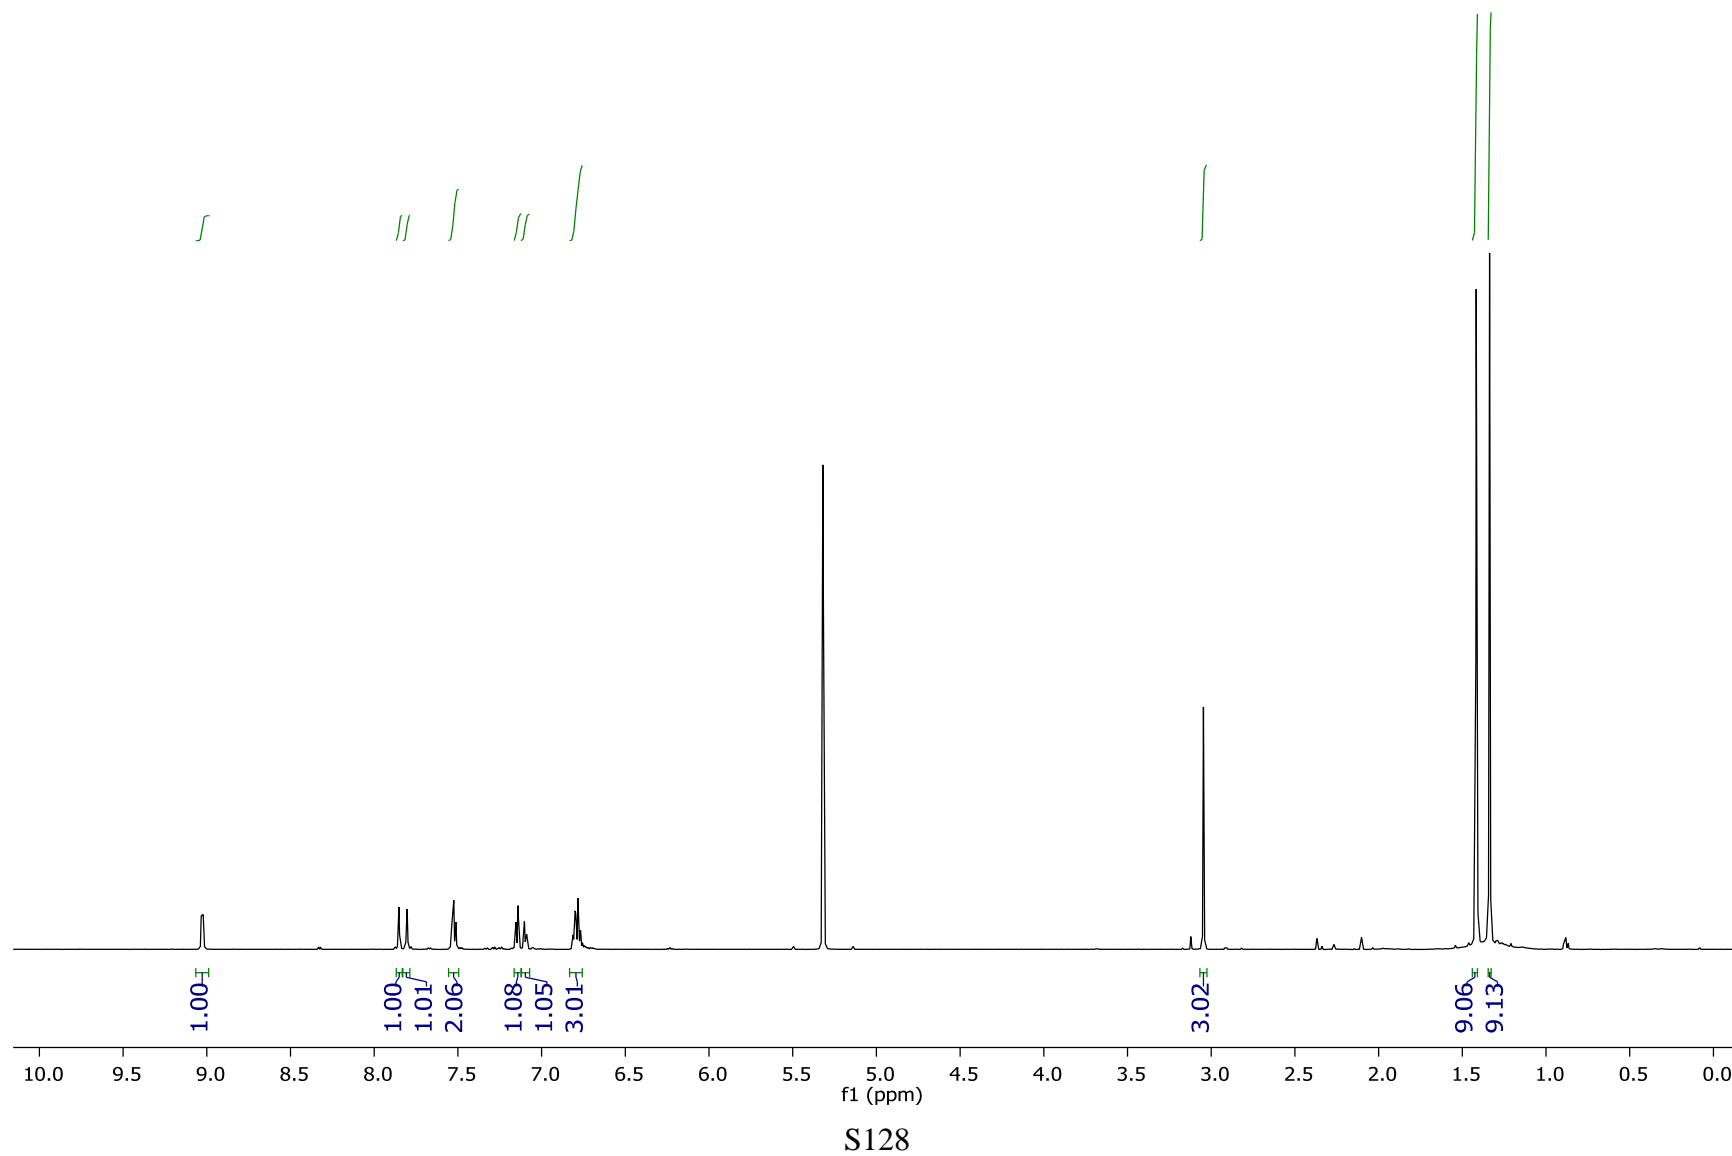

**<sup>13</sup>C NMR (126 MHz, DCM-d2, APT): Ni(dtbbpy)(*o*-tolyl)Cl (1-Cl)**

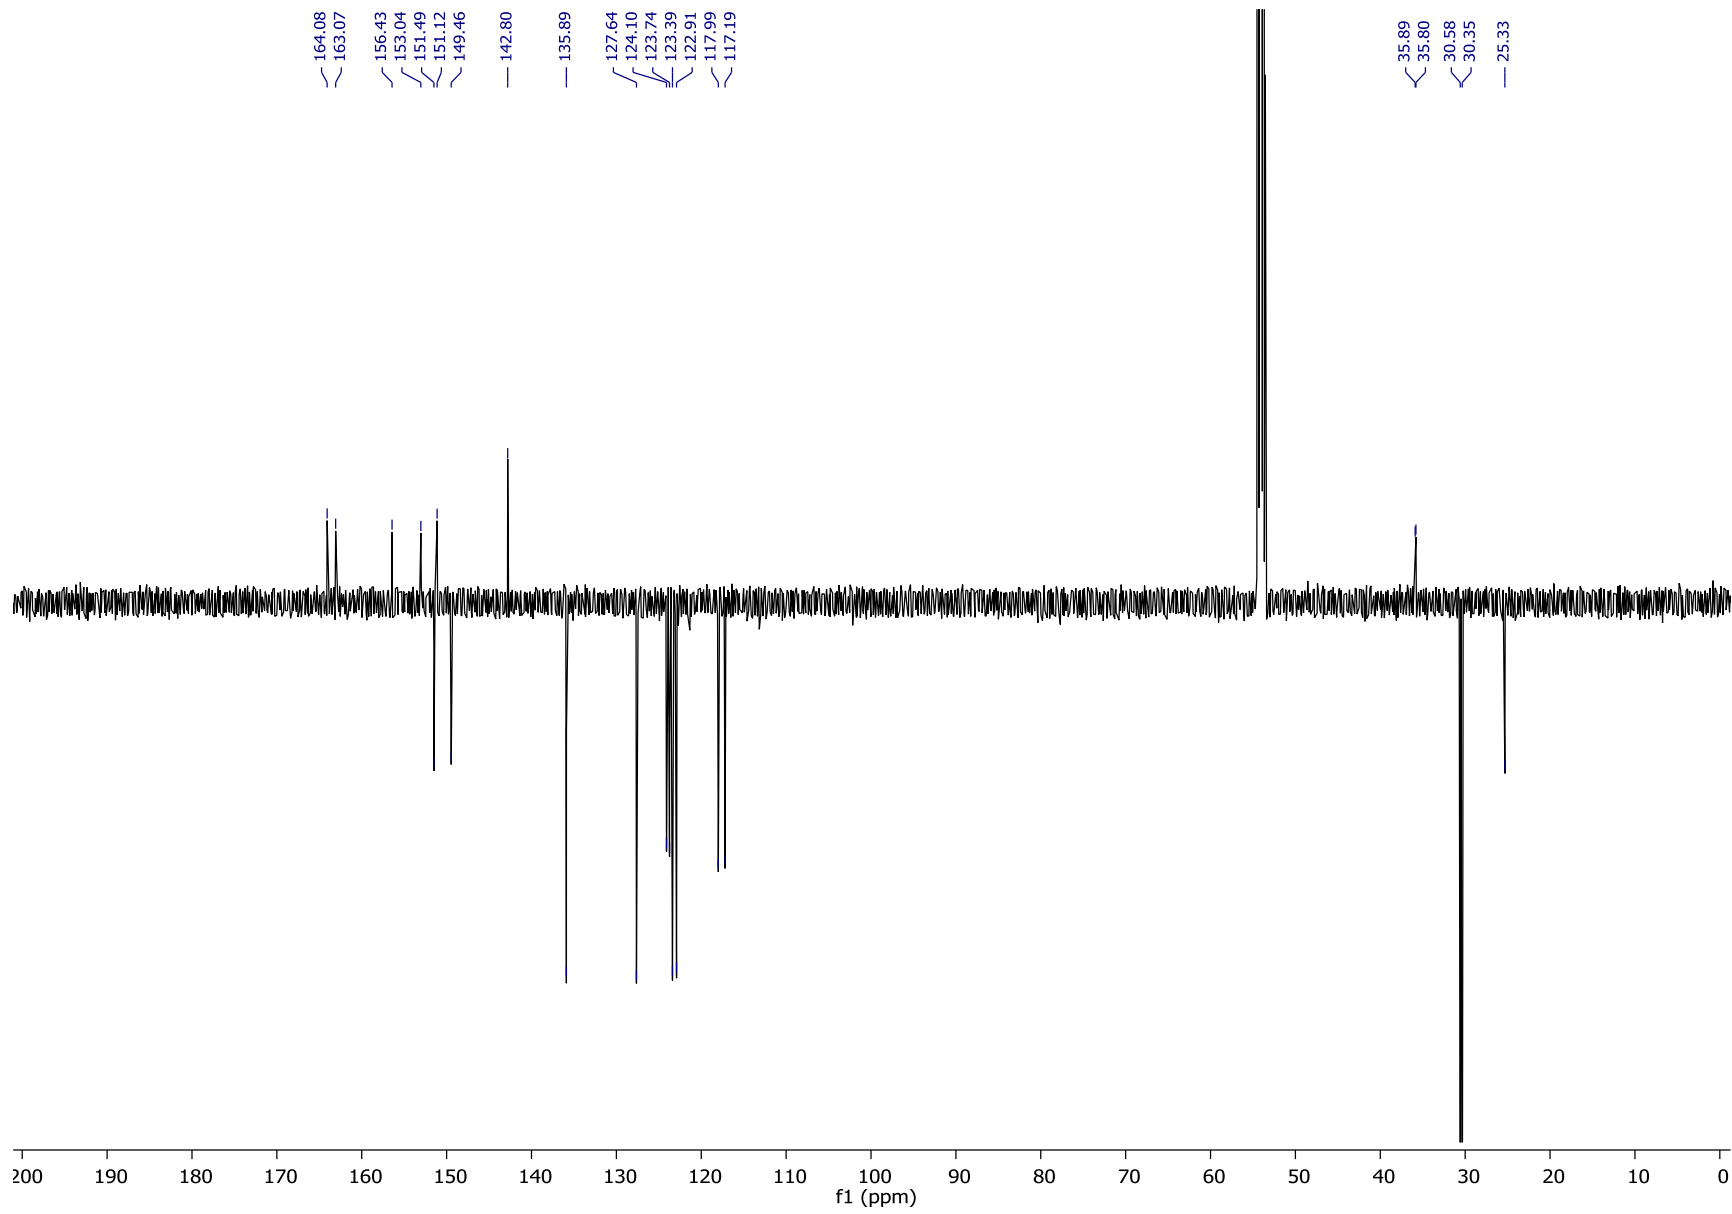

**<sup>1</sup>H NMR (501 MHz, DCM-d2): Ni(dtbbpy)(*o*-tolyl)Br (1-Br)**

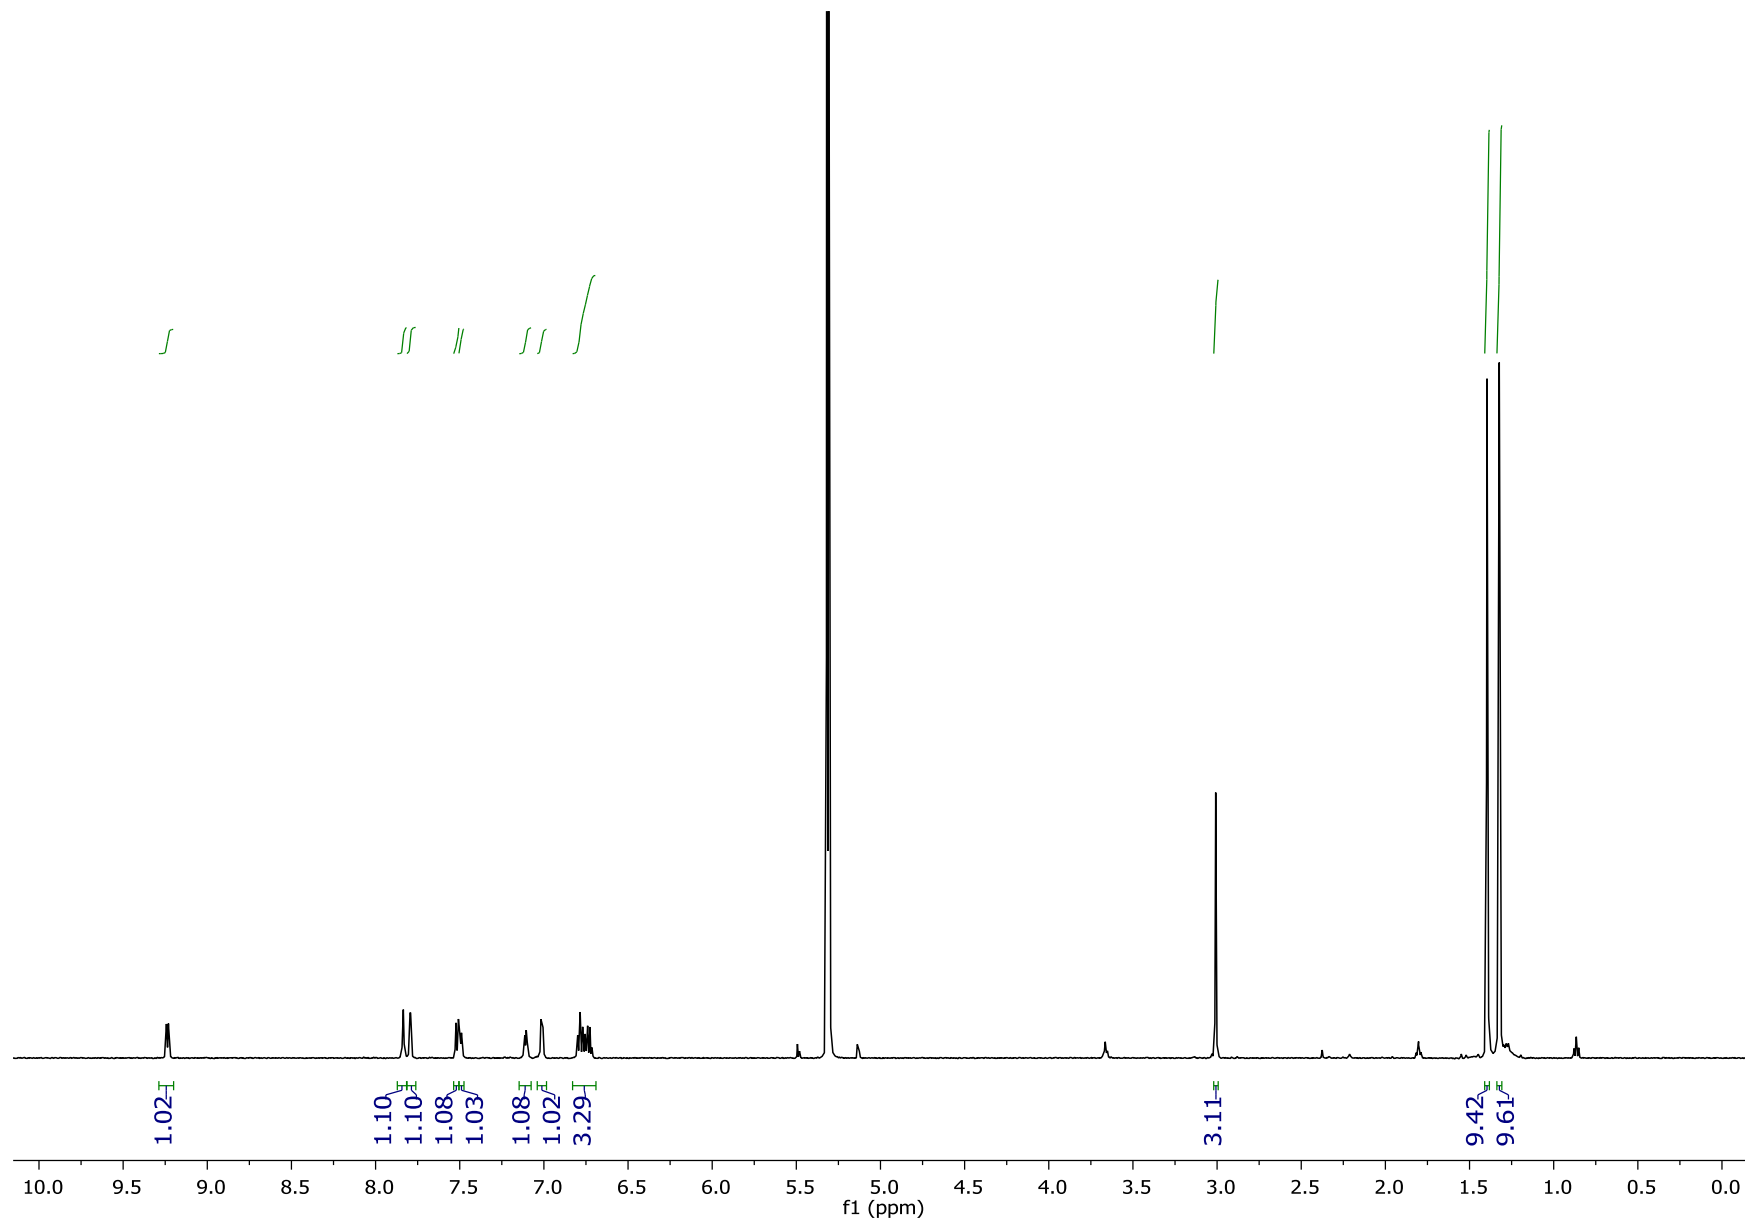

S130

**<sup>13</sup>C NMR (126 MHz, DCM-d2): Ni(dtbbpy)(*o*-tolyl)Br (1-Br)**

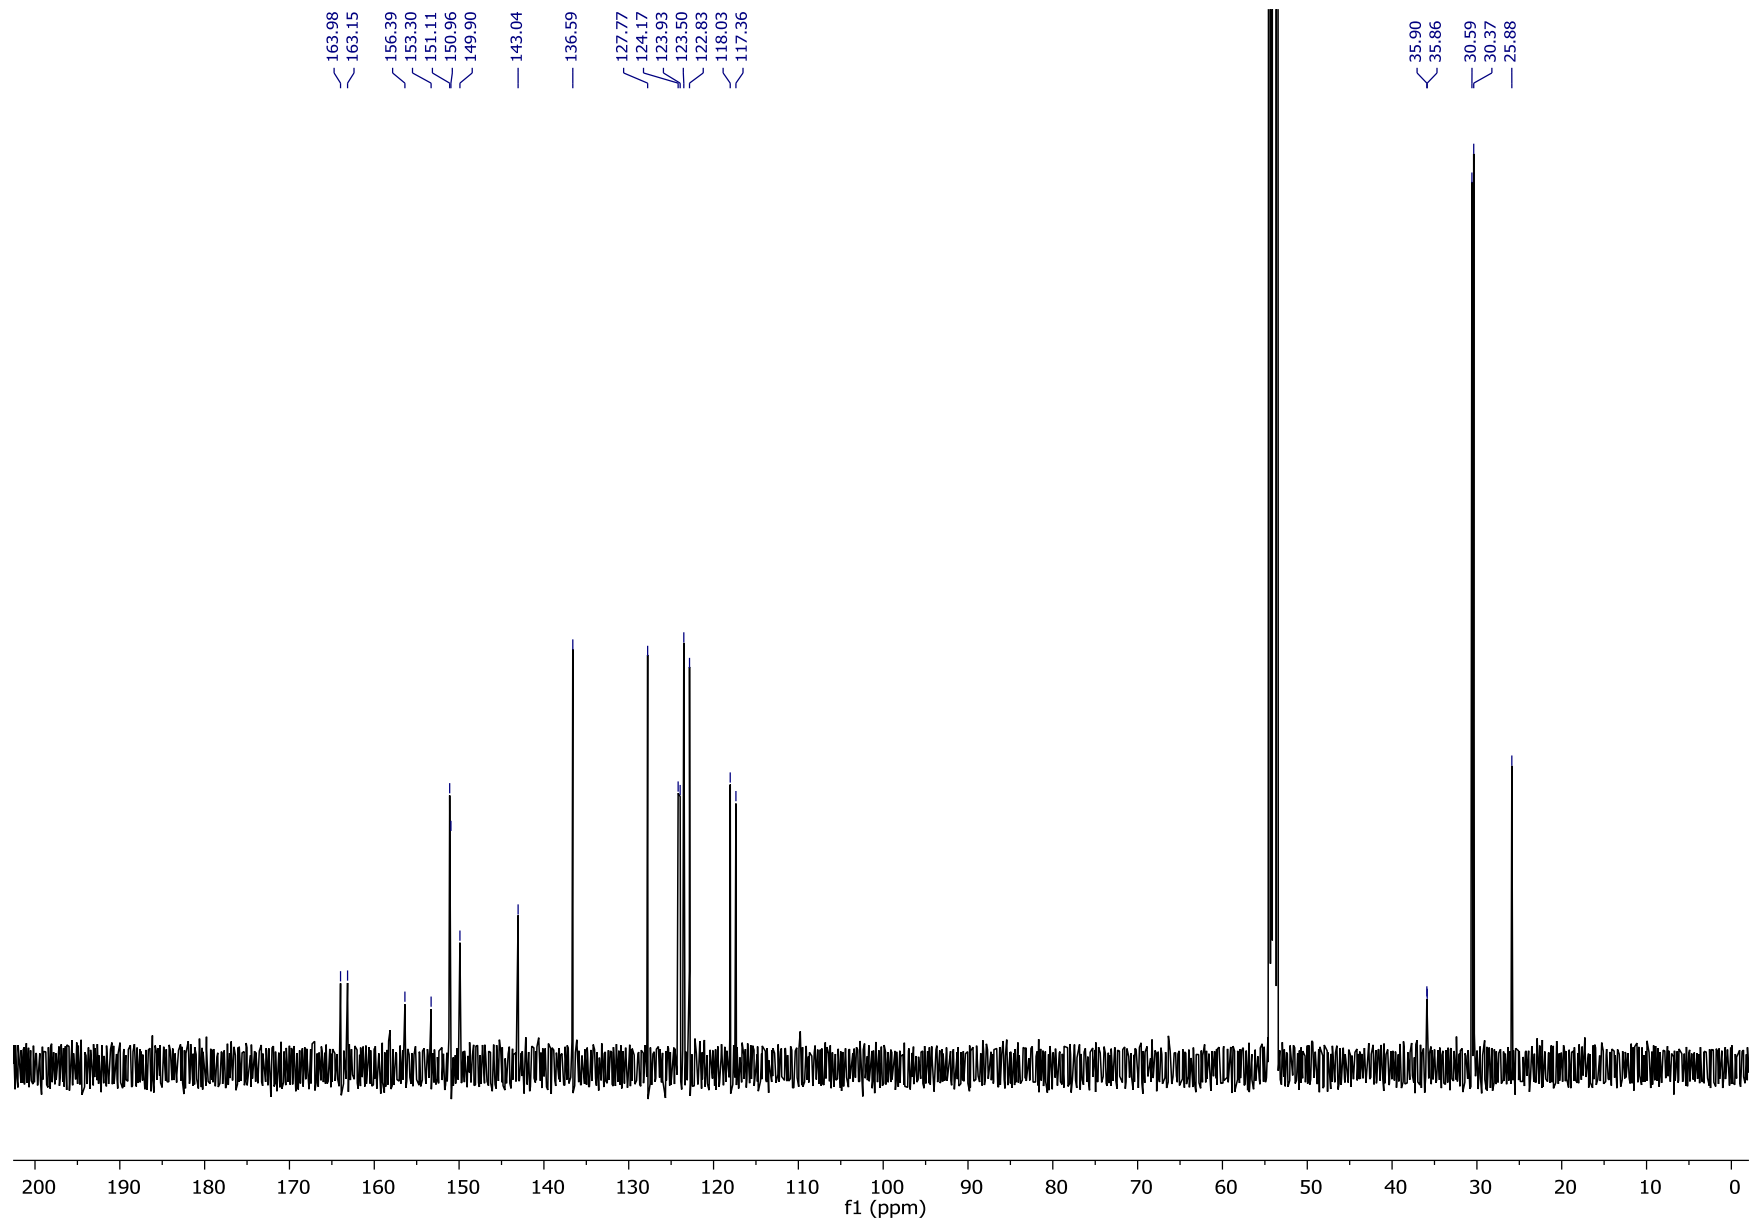

**<sup>1</sup>H NMR (501 MHz, DCM-d2): Ni(dtbbpy)(*o*-tolyl)I (1-I)**

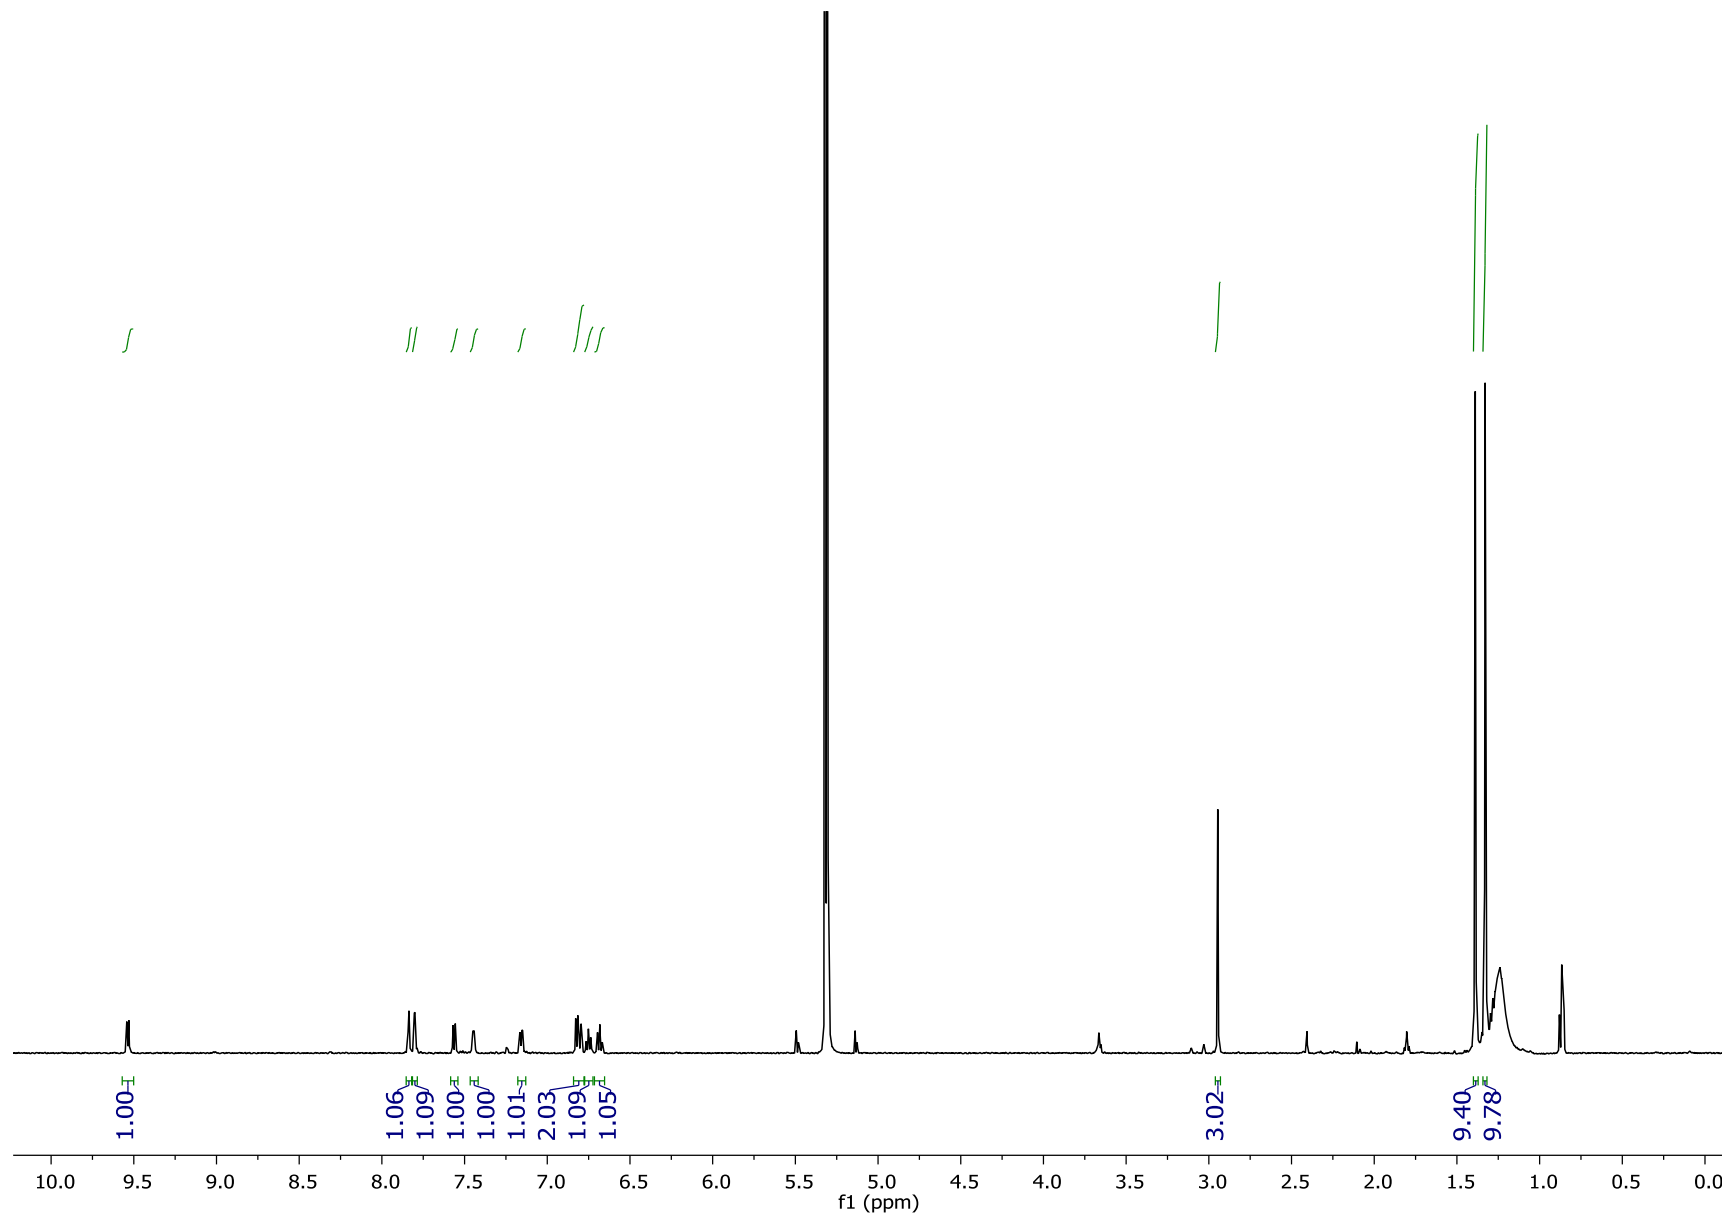

S132



**<sup>13</sup>C NMR (126 MHz, DCM-d2): Ni(dtbbpy)(*o*-tolyl)I (1-I)**

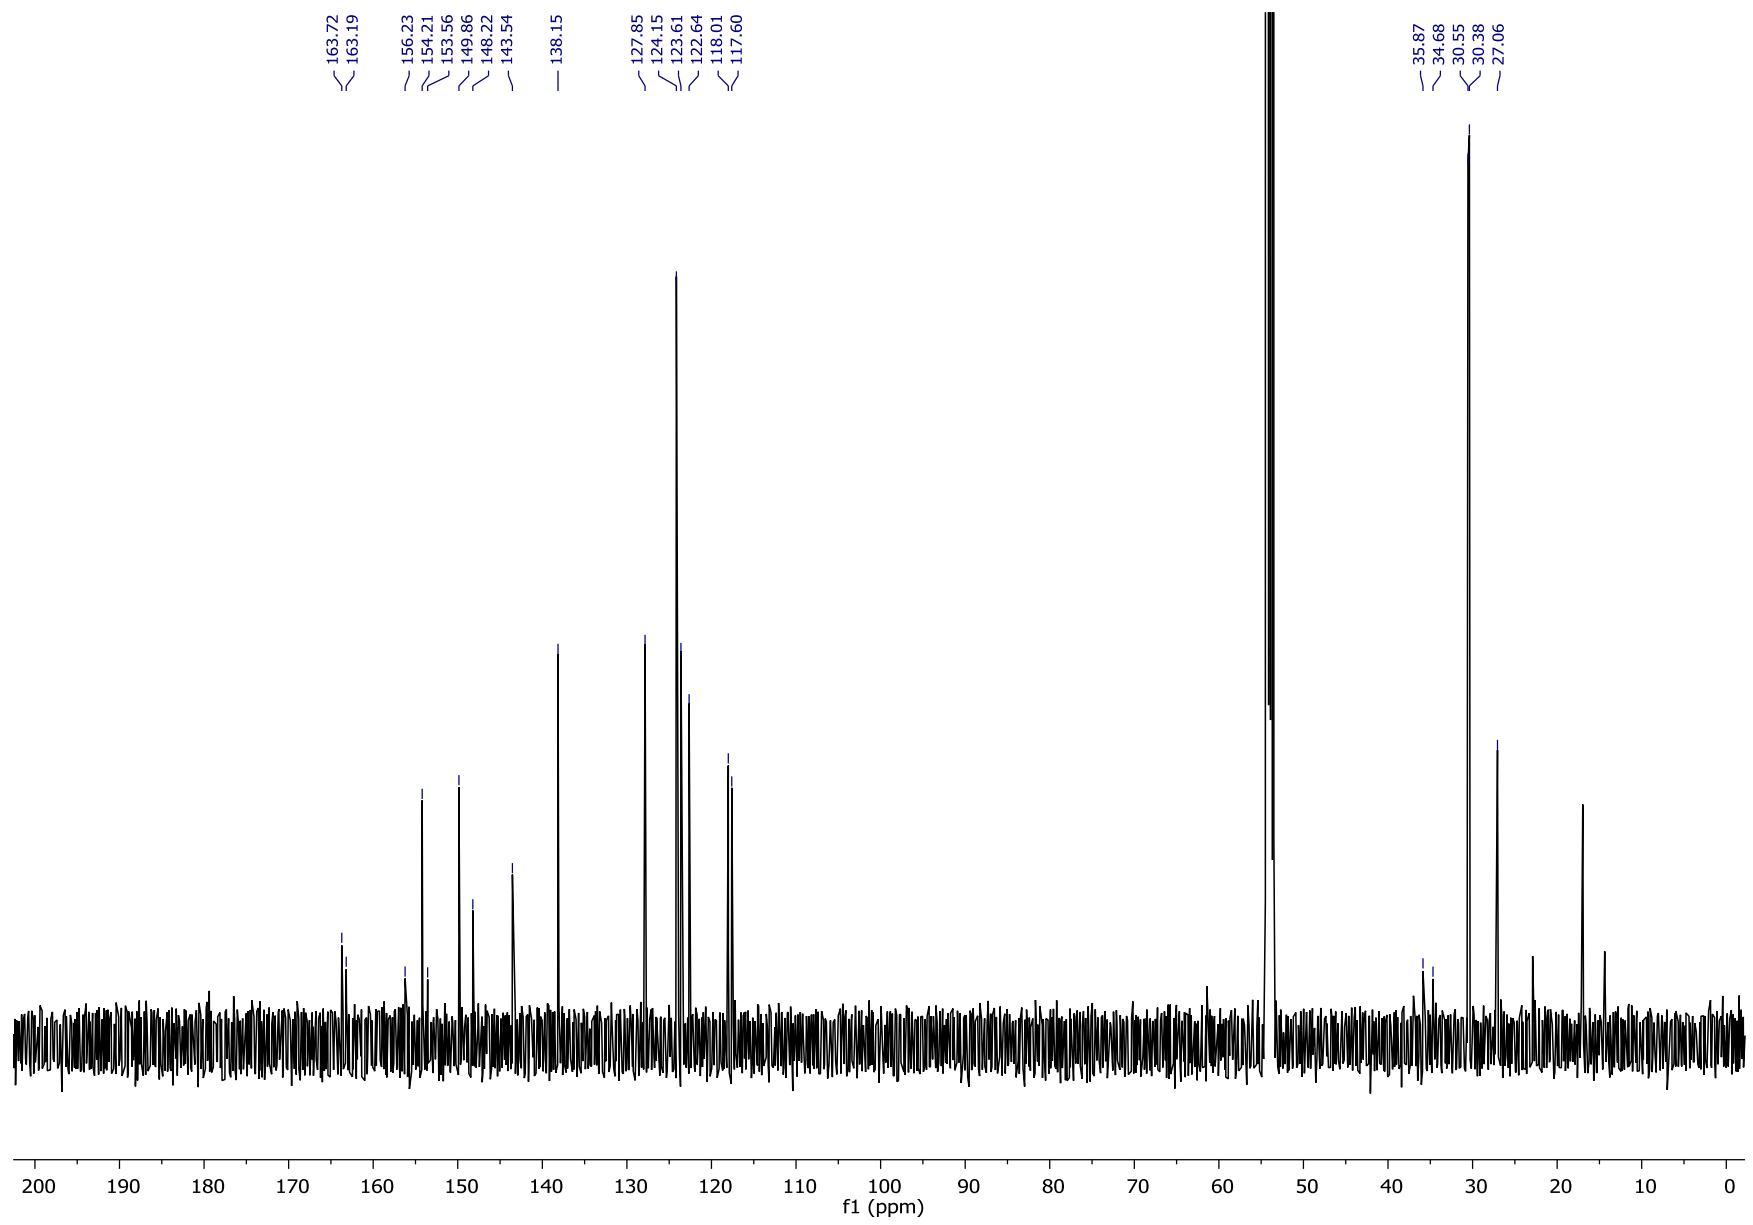

## XV. Tabulated Computational Data

**Table S16.** Cartesian coordinates for gas phase geometry-optimized Ni(II)(dtbbpy)(*o*-tolyl)Cl S<sub>0</sub> (1-Cl).

| Atom | X        | Y        | Z        |
|------|----------|----------|----------|
| Ni   | 0.026205 | 0.744235 | 0        |
| C    | 1.85428  | 2.895347 | 0.047731 |
| C    | -0.31658 | 3.675248 | -0.00289 |
| C    | 2.338074 | 4.195833 | 0.086685 |
| C    | 0.112292 | 4.993499 | 0.0344   |
| H    | -1.36778 | 3.430824 | -0.04295 |
| C    | 1.472677 | 5.292394 | 0.082809 |
| H    | 3.405754 | 4.35391  | 0.123753 |
| H    | -0.63803 | 5.769929 | 0.026443 |
| C    | 2.71663  | 1.698584 | 0.054137 |
| C    | 4.105476 | 1.726345 | 0.061677 |
| C    | 4.843681 | 0.538969 | 0.071197 |
| H    | 4.617334 | 2.677442 | 0.05899  |
| C    | 2.719709 | -0.60706 | 0.060359 |
| C    | 4.107531 | -0.64523 | 0.071015 |
| H    | 2.112631 | -1.50457 | 0.058361 |
| H    | 4.591617 | -1.6102  | 0.077902 |
| C    | -1.84656 | 1.079621 | -0.109   |
| C    | -2.65212 | 1.226073 | 1.033907 |
| C    | -2.42686 | 1.251531 | -1.36772 |
| C    | -4.00008 | 1.566875 | 0.879856 |
| C    | -3.77338 | 1.587846 | -1.51038 |
| C    | -4.56329 | 1.753612 | -0.37939 |
| H    | -4.62081 | 1.677942 | 1.763637 |
| H    | -4.19987 | 1.711579 | -2.49984 |
| Cl   | -0.38935 | -1.40947 | 0.042886 |
| N    | 0.522204 | 2.631139 | 0.004669 |
| N    | 2.032991 | 0.535656 | 0.051796 |
| H    | -1.82829 | 1.11061  | -2.26182 |
| H    | -5.61157 | 2.012497 | -0.47307 |
| C    | 2.024433 | 6.721113 | 0.134352 |
| C    | 6.376783 | 0.578016 | 0.079017 |
| C    | 2.844173 | 6.902155 | 1.430889 |
| H    | 2.224755 | 6.732105 | 2.313832 |
| H    | 3.692095 | 6.216895 | 1.479236 |
| H    | 3.237568 | 7.919736 | 1.483884 |
| C    | 2.93535  | 6.960932 | -1.08951 |
| H    | 3.784394 | 6.275556 | -1.10957 |

|   |          |          |          |
|---|----------|----------|----------|
| H | 2.381235 | 6.836294 | -2.02204 |
| H | 3.332254 | 7.978242 | -1.06483 |
| C | 0.904121 | 7.772662 | 0.118285 |
| H | 0.302149 | 7.713005 | -0.79067 |
| H | 0.239383 | 7.673488 | 0.978742 |
| H | 1.34242  | 8.771459 | 0.156153 |
| C | 6.860254 | 1.331421 | 1.337481 |
| H | 6.500556 | 2.361373 | 1.360846 |
| H | 6.517632 | 0.835445 | 2.247844 |
| H | 7.951892 | 1.361596 | 1.358322 |
| C | 6.873046 | 1.313441 | -1.18511 |
| H | 6.540442 | 0.803827 | -2.09163 |
| H | 6.512706 | 2.342522 | -1.22742 |
| H | 7.964845 | 1.344178 | -1.19484 |
| C | 6.991033 | -0.83087 | 0.092185 |
| H | 6.698032 | -1.39532 | 0.979697 |
| H | 6.708615 | -1.40746 | -0.79093 |
| H | 8.079525 | -0.75156 | 0.097993 |
| C | -2.08769 | 1.00116  | 2.416182 |
| H | -1.68859 | -0.01173 | 2.504301 |
| H | -1.26299 | 1.687682 | 2.631701 |
| H | -2.84987 | 1.14194  | 3.185342 |

---

**Table S17.** Cartesian coordinates for gas phase geometry-optimized Ni(II)(dtbbpy)(*o*-tolyl)Cl T<sub>1</sub> (1–Cl).

| Atom | X        | Y        | Z        |
|------|----------|----------|----------|
| Ni   | -0.23585 | 0.492662 | 0        |
| C    | 1.596224 | 2.617456 | 0.05809  |
| C    | -0.62224 | 3.437084 | 0.008217 |
| C    | 2.054057 | 3.949783 | 0.092257 |
| C    | -0.19544 | 4.7339   | 0.037672 |
| H    | -1.67631 | 3.208273 | -0.03016 |
| C    | 1.202093 | 5.030258 | 0.085896 |
| H    | 3.122887 | 4.108667 | 0.129377 |
| H    | -0.93965 | 5.514743 | 0.022023 |
| C    | 2.428563 | 1.466958 | 0.061445 |
| C    | 3.840702 | 1.467737 | 0.07352  |
| C    | 4.567555 | 0.295356 | 0.075278 |
| H    | 4.352974 | 2.419406 | 0.079575 |
| C    | 2.453098 | -0.87503 | 0.046827 |
| C    | 3.829128 | -0.91509 | 0.061446 |
| H    | 1.864628 | -1.78353 | 0.040969 |
| H    | 4.315825 | -1.8776  | 0.063915 |
| C    | -2.14675 | 0.81708  | -0.10181 |
| C    | -2.91365 | 1.039722 | 1.042718 |
| C    | -2.69234 | 0.876589 | -1.37505 |
| C    | -4.26174 | 1.367228 | 0.85576  |
| C    | -4.03903 | 1.205223 | -1.53495 |
| C    | -4.82177 | 1.453372 | -0.41476 |
| H    | -4.87971 | 1.550085 | 1.728288 |
| H    | -4.4658  | 1.257412 | -2.52939 |
| Cl   | -0.73858 | -1.61262 | 0.2061   |
| N    | 0.214553 | 2.366464 | 0.017344 |
| N    | 1.74999  | 0.26641  | 0.046918 |
| H    | -2.08837 | 0.668357 | -2.25102 |
| H    | -5.86942 | 1.704966 | -0.52644 |
| C    | 1.746234 | 6.464341 | 0.136574 |
| C    | 6.103857 | 0.327766 | 0.086852 |
| C    | 2.551798 | 6.663865 | 1.439472 |
| H    | 1.92457  | 6.490669 | 2.316469 |
| H    | 3.40272  | 5.983377 | 1.498473 |
| H    | 2.937343 | 7.685384 | 1.493528 |
| C    | 2.668654 | 6.713416 | -1.07677 |
| H    | 3.521672 | 6.032936 | -1.08548 |
| H    | 2.125237 | 6.579747 | -2.01449 |
| H    | 3.058148 | 7.734525 | -1.05221 |

|   |          |          |          |
|---|----------|----------|----------|
| C | 0.620647 | 7.51136  | 0.104401 |
| H | 0.026676 | 7.441583 | -0.80917 |
| H | -0.05178 | 7.412586 | 0.958976 |
| H | 1.052895 | 8.513401 | 0.14021  |
| C | 6.594923 | 1.082402 | 1.341216 |
| H | 6.242153 | 2.114667 | 1.358195 |
| H | 6.244344 | 0.594389 | 2.253024 |
| H | 7.687425 | 1.103661 | 1.365628 |
| C | 6.611581 | 1.05242  | -1.17871 |
| H | 6.275091 | 0.541057 | -2.08301 |
| H | 6.255881 | 2.082739 | -1.22586 |
| H | 7.70434  | 1.075696 | -1.18826 |
| C | 6.713602 | -1.08382 | 0.108215 |
| H | 6.411974 | -1.64371 | 0.99578  |
| H | 6.432547 | -1.66249 | -0.774   |
| H | 7.802813 | -1.0092  | 0.119552 |
| C | -2.33393 | 0.938175 | 2.430526 |
| H | -1.93132 | -0.06116 | 2.609897 |
| H | -1.51785 | 1.65137  | 2.576409 |
| H | -3.09282 | 1.140117 | 3.187094 |

---

**Table S18.** Cartesian coordinates for gas phase geometry-optimized Ni(II)(dtbbpy)(*o*-tolyl)Br S<sub>0</sub> (1-Br).

| Atom | X        | Y        | Z        |
|------|----------|----------|----------|
| Ni   | -0.3826  | 0.566038 | 0        |
| C    | 1.762865 | 2.410986 | 0.066365 |
| C    | -0.25913 | 3.52085  | 0.042828 |
| C    | 2.444909 | 3.620347 | 0.079006 |
| C    | 0.370732 | 4.756089 | 0.058222 |
| H    | -1.33617 | 3.444289 | 0.023875 |
| C    | 1.761542 | 4.83887  | 0.075275 |
| H    | 3.524767 | 3.610913 | 0.090027 |
| H    | -0.24966 | 5.639609 | 0.054869 |
| C    | 2.427985 | 1.094219 | 0.07196  |
| C    | 3.804448 | 0.911568 | 0.118052 |
| C    | 4.357129 | -0.37244 | 0.113944 |
| H    | 4.452689 | 1.774337 | 0.160122 |
| C    | 2.086575 | -1.1837  | 0.023002 |
| C    | 3.45199  | -1.43137 | 0.063048 |
| H    | 1.355757 | -1.98288 | -0.0131  |
| H    | 3.783965 | -2.45864 | 0.055441 |
| C    | -2.17675 | 1.207471 | -0.03549 |
| C    | -2.8943  | 1.480515 | 1.142757 |
| C    | -2.76601 | 1.506539 | -1.26643 |
| C    | -4.16085 | 2.067137 | 1.050012 |
| C    | -4.0306  | 2.089743 | -1.34713 |
| C    | -4.73012 | 2.377889 | -0.18153 |
| H    | -4.71336 | 2.275673 | 1.960997 |
| H    | -4.46599 | 2.308218 | -2.31605 |
| N    | 0.406208 | 2.358738 | 0.044665 |
| N    | 1.575658 | 0.048256 | 0.027324 |
| H    | -2.24082 | 1.272229 | -2.18645 |
| H    | -5.71554 | 2.826711 | -0.22735 |
| C    | 2.530118 | 6.16465  | 0.086223 |
| C    | 5.877522 | -0.56355 | 0.167681 |
| C    | 3.406704 | 6.23416  | 1.355917 |
| H    | 2.795572 | 6.17942  | 2.259061 |
| H    | 4.134917 | 5.422401 | 1.393395 |
| H    | 3.958999 | 7.176208 | 1.376826 |
| C    | 3.431039 | 6.239516 | -1.16614 |
| H    | 4.160306 | 5.428313 | -1.19264 |
| H    | 2.837322 | 6.187649 | -2.08098 |
| H    | 3.982918 | 7.182024 | -1.17298 |
| C    | 1.586311 | 7.37768  | 0.079659 |

|    |          |          |          |
|----|----------|----------|----------|
| H  | 0.956723 | 7.399116 | -0.81216 |
| H  | 0.938694 | 7.394735 | 0.958593 |
| H  | 2.174787 | 8.296774 | 0.087939 |
| C  | 6.420734 | 0.060303 | 1.472114 |
| H  | 6.215024 | 1.130423 | 1.529393 |
| H  | 5.97658  | -0.41458 | 2.349244 |
| H  | 7.503503 | -0.07298 | 1.526234 |
| C  | 6.523475 | 0.138898 | -1.04672 |
| H  | 6.148872 | -0.27487 | -1.98513 |
| H  | 6.327154 | 1.212339 | -1.05074 |
| H  | 7.606744 | 0.000881 | -1.02403 |
| C  | 6.274669 | -2.04785 | 0.136897 |
| H  | 5.871473 | -2.59608 | 0.990671 |
| H  | 5.938565 | -2.54039 | -0.77773 |
| H  | 7.362009 | -2.13421 | 0.175923 |
| C  | -2.32837 | 1.131666 | 2.498434 |
| H  | -2.14494 | 0.057159 | 2.571172 |
| H  | -1.37033 | 1.629586 | 2.676803 |
| H  | -3.01055 | 1.420247 | 3.300712 |
| Br | -1.22021 | -1.61318 | -0.06181 |

---

**Table S19.** Cartesian coordinates for gas phase geometry-optimized Ni(II)(dtbbpy)(*o*-tolyl)I S<sub>0</sub> (**1-I**).

| Atom | X        | Y        | Z        |
|------|----------|----------|----------|
| Ni   | -1.29647 | -0.39583 | -0.08424 |
| C    | 1.211175 | 0.926419 | -0.04604 |
| C    | -0.50673 | 2.4635   | -0.07642 |
| C    | 2.148971 | 1.950756 | -0.04913 |
| C    | 0.385475 | 3.524985 | -0.07698 |
| H    | -1.57288 | 2.633132 | -0.09231 |
| C    | 1.758996 | 3.291912 | -0.06334 |
| H    | 3.198883 | 1.698904 | -0.04093 |
| H    | -0.0198  | 4.525522 | -0.08907 |
| C    | 1.564804 | -0.50551 | -0.02835 |
| C    | 2.869653 | -0.98143 | 0.012323 |
| C    | 3.134791 | -2.35338 | 0.025299 |
| H    | 3.688512 | -0.27795 | 0.0352   |
| C    | 0.742761 | -2.65481 | -0.04196 |
| C    | 2.021995 | -3.19141 | -0.00361 |
| H    | -0.13541 | -3.28766 | -0.06434 |
| H    | 2.122248 | -4.26639 | 0.003496 |
| C    | -2.8905  | 0.649542 | -0.11147 |
| C    | -3.47723 | 1.138598 | 1.069831 |
| C    | -3.40265 | 1.072906 | -1.34096 |
| C    | -4.54314 | 2.040261 | 0.980145 |
| C    | -4.46501 | 1.97293  | -1.41809 |
| C    | -5.03512 | 2.465574 | -0.25025 |
| H    | -4.99799 | 2.410924 | 1.893539 |
| H    | -4.84617 | 2.279464 | -2.38595 |
| N    | -0.12145 | 1.181131 | -0.06099 |
| N    | 0.503334 | -1.34169 | -0.05462 |
| H    | -2.98252 | 0.682754 | -2.26182 |
| H    | -5.86455 | 3.161744 | -0.29325 |
| C    | 2.807587 | 4.409457 | -0.06617 |
| C    | 4.578575 | -2.86652 | 0.070387 |
| C    | 3.683138 | 4.288492 | 1.200456 |
| H    | 3.079095 | 4.377922 | 2.105596 |
| H    | 4.211887 | 3.334854 | 1.24254  |
| H    | 4.432226 | 5.083247 | 1.213051 |
| C    | 3.695849 | 4.269493 | -1.32197 |
| H    | 4.224585 | 3.315177 | -1.34446 |
| H    | 3.100918 | 4.345387 | -2.23433 |
| H    | 4.445235 | 5.063901 | -1.3389  |
| C    | 2.163055 | 5.804558 | -0.07977 |



|   |          |          |          |
|---|----------|----------|----------|
| H | 1.55086  | 5.962026 | -0.97    |
| H | 1.540312 | 5.974347 | 0.800855 |
| H | 2.944674 | 6.566254 | -0.08048 |
| C | 5.264756 | -2.34165 | 1.350632 |
| H | 5.297647 | -1.25129 | 1.379399 |
| H | 4.742164 | -2.68563 | 2.245447 |
| H | 6.293543 | -2.70541 | 1.398053 |
| C | 5.339932 | -2.3517  | -1.17087 |
| H | 4.871755 | -2.70324 | -2.09247 |
| H | 5.374269 | -1.26158 | -1.20644 |
| H | 6.369785 | -2.71517 | -1.15383 |
| C | 4.644941 | -4.40193 | 0.078479 |
| H | 4.145073 | -4.82683 | 0.951195 |
| H | 4.19748  | -4.83397 | -0.81883 |
| H | 5.688284 | -4.72059 | 0.11065  |
| C | -2.99235 | 0.688247 | 2.426824 |
| H | -3.09596 | -0.39429 | 2.531538 |
| H | -1.93362 | 0.921437 | 2.576173 |
| H | -3.55704 | 1.166563 | 3.2296   |
| I | -2.77562 | -2.47589 | -0.16028 |

---

**Table S20.** Cartesian coordinates for gas phase geometry-optimized Ni(II)(dtbbpy)Cl<sub>2</sub> T<sub>0</sub> (2).

| Atom | X        | Y        | Z        |
|------|----------|----------|----------|
| C    | -1.64046 | -0.40881 | 0        |
| C    | -3.53522 | 0.911406 | 0.001382 |
| C    | -2.4201  | -1.55879 | -0.00043 |
| C    | -4.36717 | -0.19889 | 0.001137 |
| H    | -3.93903 | 1.915868 | 0.002038 |
| C    | -3.81633 | -1.48018 | 0.000175 |
| H    | -1.9384  | -2.52521 | -0.00131 |
| H    | -5.43498 | -0.042   | 0.001641 |
| C    | -0.1557  | -0.40892 | -0.00052 |
| C    | 0.623801 | -1.55898 | 0.000001 |
| C    | 2.020056 | -1.48051 | -0.00065 |
| H    | 0.142018 | -2.52535 | 0.000992 |
| C    | 1.739199 | 0.911097 | -0.0021  |
| C    | 2.571033 | -0.19931 | -0.00179 |
| H    | 2.143122 | 1.915513 | -0.00288 |
| H    | 3.63886  | -0.04253 | -0.00237 |
| N    | -2.20933 | 0.812132 | 0.000822 |
| N    | 0.41332  | 0.811959 | -0.00146 |
| C    | -4.66359 | -2.75818 | -0.00027 |
| C    | 2.867158 | -2.75863 | -1.6E-05 |
| C    | -4.3338  | -3.58475 | -1.26269 |
| H    | -4.5505  | -3.01906 | -2.171   |
| H    | -3.28441 | -3.8821  | -1.29482 |
| H    | -4.93638 | -4.49543 | -1.27848 |
| C    | -4.33289 | -3.58621 | 1.260951 |
| H    | -3.28348 | -3.8836  | 1.291968 |
| H    | -4.54894 | -3.02158 | 2.17007  |
| H    | -4.93546 | -4.49692 | 1.276117 |
| C    | -6.1698  | -2.45278 | 0.000439 |
| H    | -6.4718  | -1.89115 | 0.886752 |
| H    | -6.47242 | -1.89013 | -0.88501 |
| H    | -6.72986 | -3.38936 | 0.000099 |
| C    | 2.536147 | -3.58698 | -1.26094 |
| H    | 1.486695 | -3.88425 | -1.2917  |
| H    | 2.752113 | -3.02264 | -2.17026 |
| H    | 3.138598 | -4.49776 | -1.27595 |
| C    | 2.537489 | -3.5848  | 1.262699 |
| H    | 2.754401 | -3.01887 | 2.170807 |
| H    | 1.488075 | -3.88202 | 1.295082 |
| H    | 3.139973 | -4.49554 | 1.278649 |

|    |          |          |          |
|----|----------|----------|----------|
| C  | 4.373402 | -2.45341 | -0.00108 |
| H  | 4.675306 | -1.89206 | -0.88761 |
| H  | 4.676247 | -1.89053 | 0.884147 |
| H  | 4.933353 | -3.39005 | -0.00057 |
| Ni | -0.89791 | 2.37074  | -4.8E-05 |
| Cl | -0.89925 | 3.145104 | -2.09615 |
| Cl | -0.89616 | 3.143876 | 2.09661  |

---

**Table S21.** Cartesian coordinates for gas phase geometry-optimized Ni(II)(dtbbpy)Cl<sub>2</sub> S<sub>1</sub> (2).

| Atom | X        | Y        | Z        |
|------|----------|----------|----------|
| Ni   | 0.662002 | -0.65124 | 0        |
| C    | -0.07389 | -3.37362 | -0.0003  |
| C    | -1.95361 | -2.03339 | 0.000481 |
| C    | -0.86031 | -4.51655 | -0.00043 |
| C    | -2.78802 | -3.14187 | 0.000511 |
| H    | -2.33253 | -1.01958 | 0.000653 |
| C    | -2.25544 | -4.42956 | -0.00004 |
| H    | -0.38008 | -5.48384 | -0.00095 |
| H    | -3.85393 | -2.97121 | 0.000896 |
| C    | 1.396726 | -3.37394 | 0.000035 |
| C    | 2.182755 | -4.51716 | 0.000033 |
| C    | 3.577891 | -4.43062 | -0.00022 |
| H    | 1.702262 | -5.4843  | 0.00037  |
| C    | 3.277021 | -2.03431 | -0.00041 |
| C    | 4.110958 | -3.14312 | -0.00052 |
| H    | 3.656237 | -1.02064 | -0.00046 |
| H    | 5.176952 | -2.97298 | -0.00081 |
| Cl   | 2.225762 | 0.88675  | 0.000519 |
| N    | -0.62142 | -2.13526 | 0.000108 |
| N    | 1.944719 | -2.13581 | -0.00017 |
| C    | -3.11375 | -5.69906 | -0.00014 |
| C    | 4.435754 | -5.70042 | -0.00016 |
| C    | -2.79107 | -6.5295  | -1.26188 |
| H    | -3.00327 | -5.96258 | -2.17052 |
| H    | -1.74419 | -6.83585 | -1.2937  |
| H    | -3.40145 | -7.435   | -1.27721 |
| C    | -2.79056 | -6.52992 | 1.261205 |
| H    | -1.74364 | -6.83616 | 1.292511 |
| H    | -3.00246 | -5.96331 | 2.17011  |
| H    | -3.40087 | -7.43546 | 1.276468 |
| C    | -4.6169  | -5.37915 | 0.00019  |
| H    | -4.91326 | -4.81384 | 0.885983 |
| H    | -4.91349 | -4.81321 | -0.88513 |
| H    | -5.18631 | -6.31013 | -4.5E-05 |
| C    | 4.112173 | -6.53132 | -1.26139 |
| H    | 3.065163 | -6.83727 | -1.29257 |
| H    | 4.324168 | -5.96488 | -2.17038 |
| H    | 4.72221  | -7.43705 | -1.2766  |
| C    | 4.112904 | -6.53066 | 1.261692 |
| H    | 4.325416 | -5.96375 | 2.170263 |

|    |          |          |          |
|----|----------|----------|----------|
| H  | 3.065913 | -6.8366  | 1.293635 |
| H  | 4.722956 | -7.43638 | 1.277025 |
| C  | 5.939031 | -5.38108 | -0.00068 |
| H  | 6.235459 | -4.81577 | -0.88645 |
| H  | 6.235994 | -4.81538 | 0.88466  |
| H  | 6.508075 | -6.31228 | -0.00065 |
| Cl | -0.90081 | 0.88716  | -0.00106 |

---

**Table S22.** Cartesian coordinates for gas phase geometry-optimized Ni(III)(dtbbpy)(*p*-AcPh)(OMe)Br (A).

| Atom | X        | Y        | Z        |
|------|----------|----------|----------|
| Ni   | -0.44549 | 0.136268 | 0        |
| C    | -2.36171 | 2.285055 | -0.17395 |
| C    | -0.23207 | 3.148674 | 0.029432 |
| C    | -2.90262 | 3.561504 | -0.10767 |
| C    | -0.7156  | 4.446998 | 0.095964 |
| H    | 0.827479 | 2.947197 | 0.092244 |
| C    | -2.0865  | 4.687214 | 0.032244 |
| H    | -3.97521 | 3.677904 | -0.15417 |
| H    | -0.00366 | 5.250909 | 0.205299 |
| C    | -3.1732  | 1.057181 | -0.31372 |
| C    | -4.55568 | 1.026753 | -0.4401  |
| C    | -5.23221 | -0.19211 | -0.56188 |
| H    | -5.11229 | 1.952203 | -0.44034 |
| C    | -3.06894 | -1.24786 | -0.42617 |
| C    | -4.44813 | -1.34586 | -0.55594 |
| H    | -2.40799 | -2.1065  | -0.41268 |
| H    | -4.88861 | -2.32746 | -0.64407 |
| C    | 1.433037 | 0.498218 | -0.12587 |
| C    | 1.93897  | 0.595412 | -1.42285 |
| C    | 2.281497 | 0.717337 | 0.958966 |
| C    | 3.273305 | 0.929896 | -1.63538 |
| C    | 3.613439 | 1.05212  | 0.742489 |
| C    | 4.128691 | 1.167555 | -0.55382 |
| H    | 3.639893 | 0.997907 | -2.65206 |
| H    | 4.278266 | 1.227409 | 1.579096 |
| N    | -1.02429 | 2.084852 | -0.10535 |
| N    | -2.45405 | -0.07751 | -0.31104 |
| H    | 1.899532 | 0.62705  | 1.967074 |
| H    | 1.304602 | 0.393552 | -2.27868 |
| C    | -2.7026  | 6.087629 | 0.120789 |
| C    | -6.7603  | -0.2147  | -0.68979 |
| C    | -3.54349 | 6.357263 | -1.14633 |
| H    | -2.92827 | 6.300511 | -2.04674 |
| H    | -4.36355 | 5.645532 | -1.25385 |
| H    | -3.97953 | 7.357343 | -1.09705 |
| C    | -3.61121 | 6.157493 | 1.368169 |
| H    | -4.42538 | 5.43268  | 1.319999 |
| H    | -3.04298 | 5.962528 | 2.279566 |
| H    | -4.05496 | 7.152118 | 1.449796 |
| C    | -1.63155 | 7.183842 | 0.234218 |

|    |          |          |          |
|----|----------|----------|----------|
| H  | -1.02604 | 7.071286 | 1.135611 |
| H  | -0.96497 | 7.193255 | -0.63069 |
| H  | -2.11588 | 8.160451 | 0.285931 |
| C  | -7.17748 | 0.582057 | -1.94545 |
| H  | -6.86317 | 1.625698 | -1.89142 |
| H  | -6.74424 | 0.147101 | -2.84853 |
| H  | -8.26446 | 0.569244 | -2.05092 |
| C  | -7.38256 | 0.435782 | 0.565418 |
| H  | -7.09574 | -0.10364 | 1.470106 |
| H  | -7.07274 | 1.475332 | 0.683491 |
| H  | -8.47218 | 0.420473 | 0.491269 |
| C  | -7.3094  | -1.64436 | -0.81827 |
| H  | -6.92434 | -2.15026 | -1.70601 |
| H  | -7.07121 | -2.25274 | 0.056415 |
| H  | -8.39668 | -1.60934 | -0.90653 |
| O  | -0.18911 | -1.58817 | -0.50962 |
| C  | 0.831643 | -2.45445 | -0.08508 |
| H  | 0.939256 | -2.45435 | 1.005635 |
| H  | 0.562227 | -3.47113 | -0.39845 |
| H  | 1.805536 | -2.21295 | -0.52763 |
| Br | -0.78612 | 0.115597 | 2.500965 |
| C  | 5.566791 | 1.534636 | -0.7294  |
| O  | 6.273338 | 1.785602 | 0.229927 |
| C  | 6.142156 | 1.58943  | -2.13364 |
| H  | 6.045419 | 0.623378 | -2.63481 |
| H  | 5.617504 | 2.328255 | -2.74438 |
| H  | 7.193894 | 1.858879 | -2.06857 |

---

**Table S23.** Cartesian coordinates for gas phase geometry-optimized Ni(I)(dtbbpy)Br (**B**).

| Atom | X        | Y        | Z        |
|------|----------|----------|----------|
| Ni   | -1.326   | 0.545073 | 0        |
| C    | -4.0682  | 1.283377 | 0.000077 |
| C    | -2.73664 | 3.169768 | 0.000087 |
| C    | -5.21342 | 2.070456 | 0.000105 |
| C    | -3.84179 | 4.006156 | 0.000098 |
| H    | -1.73045 | 3.570308 | 0.0001   |
| C    | -5.13021 | 3.465008 | 0.000106 |
| H    | -6.18144 | 1.590478 | 0.000114 |
| H    | -3.67833 | 5.073404 | 0.000099 |
| C    | -4.06796 | -0.19431 | 0.000012 |
| C    | -5.2129  | -0.98179 | 0.000107 |
| C    | -5.12921 | -2.37632 | 0.000035 |
| H    | -6.1811  | -0.50217 | 0.000225 |
| C    | -2.73574 | -2.08023 | -0.00027 |
| C    | -3.84061 | -2.91701 | -0.00019 |
| H    | -1.72941 | -2.48043 | -0.00041 |
| H    | -3.67672 | -3.98419 | -0.00031 |
| N    | -2.83124 | 1.835521 | 0.000073 |
| N    | -2.83082 | -0.74603 | -0.00015 |
| C    | -6.40395 | 4.318864 | 0.000146 |
| C    | -6.40265 | -3.23066 | 0.00023  |
| C    | -7.23482 | 3.99453  | -1.2607  |
| H    | -6.66825 | 4.207636 | -2.16941 |
| H    | -7.53636 | 2.946258 | -1.29201 |
| H    | -8.1431  | 4.601249 | -1.27706 |
| C    | -7.23469 | 3.994563 | 1.261083 |
| H    | -7.53623 | 2.94629  | 1.292445 |
| H    | -6.66803 | 4.207691 | 2.169731 |
| H    | -8.14297 | 4.601282 | 1.277519 |
| C    | -6.09143 | 5.823927 | 0.000109 |
| H    | -5.52715 | 6.12349  | 0.885662 |
| H    | -5.5273  | 6.123475 | -0.88554 |
| H    | -7.02534 | 6.388854 | 0.00018  |
| C    | -7.23393 | -2.90648 | -1.26038 |
| H    | -7.5357  | -1.85827 | -1.29162 |
| H    | -6.66759 | -3.11949 | -2.16925 |
| H    | -8.14208 | -3.5134  | -1.27646 |
| C    | -7.23327 | -2.90681 | 1.261389 |
| H    | -6.66639 | -3.11998 | 2.169891 |
| H    | -7.53508 | -1.85863 | 1.292998 |
| H    | -8.14136 | -3.5138  | 1.277825 |



|    |          |          |          |
|----|----------|----------|----------|
| C  | -6.08963 | -4.7356  | -3.5E-05 |
| H  | -5.52556 | -5.03487 | -0.88582 |
| H  | -5.52511 | -5.03509 | 0.885383 |
| H  | -7.02336 | -5.30082 | 0.000137 |
| Br | 0.976569 | 0.545192 | 0.000309 |

---

**Table S24.** Cartesian coordinates for gas phase geometry-optimized 4-methoxyacetophenone (C).

| Atom | X        | Y        | Z        |
|------|----------|----------|----------|
| C    | -1.52516 | -0.05241 | 0        |
| C    | -2.89591 | -0.22865 | 0.000058 |
| C    | -3.74574 | 0.883183 | 0.000034 |
| C    | -3.20017 | 2.171506 | -0.00029 |
| C    | -1.82258 | 2.330889 | -0.00037 |
| C    | -0.96013 | 1.231702 | -0.00018 |
| H    | -0.89026 | -0.92874 | -1.1E-05 |
| H    | -3.33599 | -1.21729 | 0.000085 |
| H    | -3.8359  | 3.045318 | -0.00051 |
| H    | -1.38912 | 3.322674 | -0.00053 |
| O    | -5.0757  | 0.610643 | 0.000316 |
| C    | 0.511949 | 1.473086 | 0.000121 |
| O    | 0.961866 | 2.605106 | 0.000605 |
| C    | 1.447811 | 0.278257 | -3.9E-05 |
| H    | 1.285248 | -0.34669 | 0.881459 |
| H    | 1.284086 | -0.34798 | -0.88035 |
| H    | 2.473802 | 0.638921 | -0.00088 |
| C    | -6.00038 | 1.692916 | 0.000243 |
| H    | -5.88826 | 2.313433 | -0.89332 |
| H    | -6.98763 | 1.237387 | 0.000695 |
| H    | -5.88773 | 2.314033 | 0.893363 |

**Table S25.** Cartesian coordinates for gas phase geometry-optimized Ni(II)(dtbbpy)(*p*-AcPh)(OMe) (**D**).

| Atom | X        | Y        | Z        |
|------|----------|----------|----------|
| Ni   | -0.77044 | 0.691824 | 0        |
| C    | 1.100421 | 2.810269 | 0.027791 |
| C    | -1.05501 | 3.633862 | 0.014036 |
| C    | 1.611267 | 4.100987 | 0.037708 |
| C    | -0.59883 | 4.942644 | 0.024167 |
| H    | -2.11219 | 3.415272 | 0.00256  |
| C    | 0.76906  | 5.214802 | 0.035775 |
| H    | 2.683142 | 4.235465 | 0.046325 |
| H    | -1.33285 | 5.734531 | 0.021329 |
| C    | 1.933517 | 1.594815 | 0.030986 |
| C    | 3.32315  | 1.568055 | 0.047845 |
| C    | 4.008823 | 0.349396 | 0.051201 |
| H    | 3.873098 | 2.497942 | 0.059201 |
| C    | 1.840945 | -0.71416 | 0.019063 |
| C    | 3.225933 | -0.80716 | 0.035575 |
| H    | 1.171968 | -1.56842 | 0.006823 |
| H    | 3.673969 | -1.78944 | 0.036536 |
| C    | -2.64385 | 1.018711 | -0.00756 |
| C    | -3.38143 | 1.075488 | 1.183701 |
| C    | -3.34851 | 1.248312 | -1.20177 |
| C    | -4.74459 | 1.354409 | 1.188664 |
| C    | -4.7074  | 1.530844 | -1.20711 |
| C    | -5.43099 | 1.591291 | -0.0088  |
| H    | -5.27086 | 1.386049 | 2.135304 |
| H    | -5.2368  | 1.706287 | -2.13574 |
| N    | -0.23944 | 2.570331 | 0.014916 |
| N    | 1.211752 | 0.458767 | 0.017087 |
| H    | -2.82663 | 1.201018 | -2.15224 |
| H    | -2.88859 | 0.890901 | 2.132678 |
| C    | 1.350051 | 6.632894 | 0.045905 |
| C    | 5.542649 | 0.325387 | 0.071462 |
| C    | 2.21063  | 6.821713 | 1.314389 |
| H    | 1.61385  | 6.681516 | 2.217973 |
| H    | 3.045447 | 6.119787 | 1.351742 |
| H    | 2.626071 | 7.8317   | 1.336184 |
| C    | 2.229391 | 6.832051 | -1.20804 |
| H    | 3.064324 | 6.129936 | -1.23901 |
| H    | 1.646027 | 6.700029 | -2.12152 |
| H    | 2.645625 | 7.841927 | -1.21501 |
| C    | 0.250692 | 7.706682 | 0.042025 |

|   |          |          |          |
|---|----------|----------|----------|
| H | -0.37801 | 7.643524 | -0.8484  |
| H | -0.39115 | 7.636531 | 0.922536 |
| H | 0.709669 | 8.696906 | 0.049317 |
| C | 6.046472 | 1.043509 | 1.342547 |
| H | 5.731807 | 2.087806 | 1.373605 |
| H | 5.67314  | 0.553499 | 2.244046 |
| H | 7.138243 | 1.025517 | 1.374249 |
| C | 6.080465 | 1.054119 | -1.17944 |
| H | 5.733045 | 0.570869 | -2.09482 |
| H | 5.765314 | 2.098256 | -1.21093 |
| H | 7.17272  | 1.037593 | -1.18093 |
| C | 6.099546 | -1.10723 | 0.073116 |
| H | 5.777198 | -1.66884 | 0.952172 |
| H | 5.800277 | -1.66216 | -0.81825 |
| H | 7.190314 | -1.07207 | 0.087424 |
| O | -0.92302 | -1.12354 | -0.01276 |
| C | -2.07623 | -1.91176 | -0.05096 |
| H | -2.69628 | -1.73224 | -0.94079 |
| H | -1.77337 | -2.96862 | -0.07159 |
| H | -2.72488 | -1.77575 | 0.82637  |
| C | -6.88705 | 1.900546 | -0.05855 |
| O | -7.44731 | 2.155038 | -1.11165 |
| C | -7.68192 | 1.892636 | 1.237009 |
| H | -7.62303 | 0.91803  | 1.72703  |
| H | -7.29454 | 2.634622 | 1.939443 |
| H | -8.7208  | 2.121173 | 1.009403 |

---

**Table S26.** Cartesian coordinates for gas phase geometry-optimized Ni(0)(dtbbpy) (**E**).

| Atom | X        | Y        | Z        |
|------|----------|----------|----------|
| Ni   | 1.198565 | 0.828092 | 0.062814 |
| C    | 0.477162 | -1.71557 | -0.06486 |
| C    | -1.38454 | -0.41724 | -0.56377 |
| C    | -0.33966 | -2.82076 | 0.134541 |
| C    | -2.23664 | -1.48241 | -0.34675 |
| H    | -1.774   | 0.54038  | -0.88589 |
| C    | -1.72715 | -2.74542 | -0.00984 |
| H    | 0.123787 | -3.7457  | 0.452055 |
| H    | -3.29679 | -1.3214  | -0.47964 |
| C    | 1.921937 | -1.71543 | 0.188232 |
| C    | 2.739059 | -2.82047 | -0.01076 |
| C    | 4.126458 | -2.74487 | 0.134243 |
| H    | 2.275907 | -3.74553 | -0.32834 |
| C    | 3.783222 | -0.41669 | 0.687651 |
| C    | 4.6356   | -1.48177 | 0.47128  |
| H    | 4.172273 | 0.541204 | 1.009468 |
| H    | 5.69565  | -1.32058 | 0.604721 |
| N    | -0.03788 | -0.49923 | -0.46231 |
| N    | 2.436685 | -0.49894 | 0.58564  |
| C    | -2.60689 | -3.98009 | 0.220543 |
| C    | 5.006504 | -3.9794  | -0.09569 |
| C    | -2.18116 | -5.10448 | -0.74878 |
| H    | -2.29374 | -4.78715 | -1.78763 |
| H    | -1.13994 | -5.39483 | -0.59921 |
| H    | -2.79897 | -5.9931  | -0.59527 |
| C    | -2.43798 | -4.47132 | 1.675284 |
| H    | -1.40453 | -4.74663 | 1.891889 |
| H    | -2.73246 | -3.69581 | 2.385427 |
| H    | -3.06196 | -5.35106 | 1.853444 |
| C    | -4.0957  | -3.67971 | -0.01622 |
| H    | -4.47027 | -2.9161  | 0.668714 |
| H    | -4.28445 | -3.34519 | -1.03857 |
| H    | -4.6833  | -4.58528 | 0.14824  |
| C    | 4.838467 | -4.47063 | -1.55054 |
| H    | 3.80522  | -4.74623 | -1.76768 |
| H    | 5.133103 | -3.695   | -2.2605  |
| H    | 5.462802 | -5.35017 | -1.72839 |
| C    | 4.580376 | -5.10389 | 0.873354 |
| H    | 4.692345 | -4.7866  | 1.912283 |
| H    | 3.53927  | -5.39434 | 0.723186 |
| H    | 5.198383 | -5.99243 | 0.72014  |

|   |          |          |          |
|---|----------|----------|----------|
| C | 6.49516  | -3.67888 | 0.141886 |
| H | 6.869947 | -2.91502 | -0.54265 |
| H | 6.683362 | -3.34461 | 1.164419 |
| H | 7.082958 | -4.58432 | -0.02253 |

---

**Table S27.** Cartesian coordinates for gas phase geometry-optimized Ni(I)(dtbbpy)(OMe) (F).

| Atom | X        | Y        | Z        |
|------|----------|----------|----------|
| Ni   | -1.62002 | 0.40366  | 0        |
| C    | -0.87834 | -2.3386  | 0.126159 |
| C    | 1.004058 | -1.0023  | -0.04809 |
| C    | -0.07654 | -3.47269 | 0.236614 |
| C    | 1.84579  | -2.09377 | 0.045318 |
| H    | 1.399928 | 0.000146 | -0.15517 |
| C    | 1.313108 | -3.38306 | 0.200056 |
| H    | -0.55024 | -4.43765 | 0.350368 |
| H    | 2.911475 | -1.92552 | 0.0018   |
| C    | -2.34403 | -2.34379 | 0.126547 |
| C    | -3.13782 | -3.48363 | 0.236211 |
| C    | -4.52807 | -3.4036  | 0.20034  |
| H    | -2.65734 | -4.4454  | 0.348483 |
| C    | -4.23569 | -1.02053 | -0.04556 |
| C    | -5.06983 | -2.11791 | 0.047508 |
| H    | -4.6385  | -0.02075 | -0.15171 |
| H    | -6.13669 | -1.95702 | 0.004878 |
| N    | -0.33445 | -1.09793 | -0.00739 |
| N    | -2.89668 | -1.10702 | -0.00597 |
| C    | 2.179637 | -4.64321 | 0.321313 |
| C    | -5.38582 | -4.66993 | 0.319575 |
| C    | 1.874167 | -5.35063 | 1.659762 |
| H    | 2.08498  | -4.69464 | 2.506814 |
| H    | 0.830022 | -5.65995 | 1.72806  |
| H    | 2.49262  | -6.2457  | 1.760707 |
| C    | 1.857632 | -5.59898 | -0.84839 |
| H    | 0.808824 | -5.90016 | -0.84958 |
| H    | 2.071224 | -5.12682 | -1.80957 |
| H    | 2.464037 | -6.50483 | -0.77272 |
| C    | 3.681532 | -4.31837 | 0.279827 |
| H    | 3.970274 | -3.84647 | -0.66157 |
| H    | 3.978281 | -3.66063 | 1.099396 |
| H    | 4.25702  | -5.24124 | 0.373908 |
| C    | -5.07478 | -5.3781  | 1.656348 |
| H    | -4.02872 | -5.68128 | 1.723103 |
| H    | -5.28877 | -4.72508 | 2.504894 |
| H    | -5.68769 | -6.2771  | 1.756098 |
| C    | -5.05782 | -5.62097 | -0.85232 |
| H    | -5.27565 | -5.14844 | -1.81237 |
| H    | -4.00684 | -5.91443 | -0.85495 |

|   |          |          |          |
|---|----------|----------|----------|
| H | -5.65756 | -6.53136 | -0.77798 |
| C | -6.88996 | -4.35539 | 0.279412 |
| H | -7.19114 | -3.7019  | 1.100774 |
| H | -7.18219 | -3.88305 | -0.66068 |
| H | -7.45892 | -5.28253 | 0.371104 |
| O | -1.63107 | 2.196161 | 0.147851 |
| C | -1.65002 | 3.154839 | 1.150759 |
| H | -1.61433 | 4.169053 | 0.721995 |
| H | -2.56063 | 3.104778 | 1.771475 |
| H | -0.79228 | 3.07104  | 1.839374 |

---



**Table S28.** Cartesian coordinates for gas phase geometry-optimized 4-bromoacetophenone (**F**).

| Atom | X        | Y        | Z        |
|------|----------|----------|----------|
| C    | -0.02621 | -0.37736 | 0        |
| C    | -1.4157  | -0.41632 | 0.000048 |
| C    | -2.12299 | 0.778604 | -0.00012 |
| C    | -1.46799 | 2.006367 | -0.00032 |
| C    | -0.08213 | 2.028938 | -0.00035 |
| C    | 0.657867 | 0.841513 | -0.0002  |
| H    | 0.516808 | -1.3132  | 0.000134 |
| H    | -1.93921 | -1.36234 | 0.000212 |
| H    | -2.03407 | 2.927694 | -0.00045 |
| H    | 0.451753 | 2.970225 | -0.00049 |
| C    | 2.155141 | 0.931869 | -0.00022 |
| O    | 2.707478 | 2.014798 | -6.5E-05 |
| C    | 2.965523 | -0.34851 | -0.00013 |
| H    | 2.741215 | -0.95419 | 0.881301 |
| H    | 2.740693 | -0.95479 | -0.88099 |
| H    | 4.022351 | -0.09237 | -0.00049 |
| Br   | -4.038   | 0.735657 | -7.8E-05 |

Calculated Orbital Contribution Data for TD-DFT Transitions. The significance of Kohn-Sham orbital contributions to a transition were evaluated (frontier orbital diagrams presented in section IV) using the fractional sum of squares of the transition coefficient ( $C_i^2/\Sigma C_i^2$ ).

**Table S29.** TD-DFT calculated transition Kohn-Sham orbital contributions for [Ni(dtbbpy)(*o*-tolyl)Cl] S<sub>0</sub> (x).

| Excited State | KS Orbital Transition |      |      | $C_i$    | $C_i^2/\Sigma C_i^2$ |    |
|---------------|-----------------------|------|------|----------|----------------------|----|
| 1             | 117A                  | ->   | 124A | -0.13591 | 2%                   |    |
|               | 118A                  | ->   | 124A | 0.14928  | 2%                   |    |
|               | 120A                  | ->   | 124A | 0.69600  | 43%                  |    |
|               | 117B                  | ->   | 124B | 0.13591  | 2%                   |    |
|               | 118B                  | ->   | 124B | -0.14928 | 2%                   |    |
|               | 120B                  | ->   | 124B | -0.69600 | 43%                  |    |
|               | 120A                  | <-   | 124A | 0.20717  | 4%                   |    |
|               | 120B                  | <-   | 124B | -0.20717 | 4%                   |    |
|               | 2                     | 113A | ->   | 124A     | -0.24706             | 6% |
|               |                       | 115A | ->   | 124A     | -0.19881             | 4% |
| 119A          |                       | ->   | 124A | 0.63372  | 38%                  |    |
| 113B          |                       | ->   | 124B | 0.24706  | 6%                   |    |
| 115B          |                       | ->   | 124B | 0.19881  | 4%                   |    |
| 119B          |                       | ->   | 124B | -0.63372 | 38%                  |    |
| 119A          |                       | <-   | 124A | 0.14492  | 2%                   |    |
| 119B          |                       | <-   | 124B | -0.14492 | 2%                   |    |
| 3             | 115A                  | ->   | 124A | 0.67885  | 45%                  |    |
|               | 119A                  | ->   | 124A | 0.17158  | 3%                   |    |
|               | 115B                  | ->   | 124B | -0.67885 | 45%                  |    |
|               | 119B                  | ->   | 124B | -0.17158 | 3%                   |    |
|               | 115A                  | <-   | 124A | 0.14169  | 2%                   |    |
|               | 115B                  | <-   | 124B | -0.14169 | 2%                   |    |
| 4             | 110A                  | ->   | 124A | 0.25484  | 7%                   |    |
|               | 111A                  | ->   | 124A | -0.23668 | 6%                   |    |
|               | 116A                  | ->   | 124A | -0.22050 | 5%                   |    |
|               | 117A                  | ->   | 124A | 0.42040  | 19%                  |    |
|               | 118A                  | ->   | 124A | 0.19551  | 4%                   |    |
|               | 119A                  | ->   | 121A | 0.27249  | 8%                   |    |
|               | 120A                  | ->   | 121A | -0.13308 | 2%                   |    |
|               | 110B                  | ->   | 124B | -0.25484 | 7%                   |    |
|               | 111B                  | ->   | 124B | 0.23668  | 6%                   |    |
|               | 116B                  | ->   | 124B | 0.22050  | 5%                   |    |
|               | 117B                  | ->   | 124B | -0.42040 | 19%                  |    |
|               | 118B                  | ->   | 124B | -0.19551 | 4%                   |    |
|               | 119B                  | ->   | 121B | -0.27249 | 8%                   |    |

|      |      |      |          |          |     |
|------|------|------|----------|----------|-----|
| 5    | 120B | ->   | 121B     | 0.13308  | 2%  |
|      | 117A | ->   | 124A     | 0.10312  | 1%  |
|      | 118A | ->   | 121A     | 0.10827  | 1%  |
|      | 120A | ->   | 121A     | 0.66191  | 46% |
|      | 120A | ->   | 122A     | 0.11996  | 2%  |
|      | 117B | ->   | 124B     | -0.10312 | 1%  |
|      | 118B | ->   | 121B     | -0.10827 | 1%  |
|      | 120B | ->   | 121B     | -0.66191 | 46% |
| 6    | 120B | ->   | 122B     | -0.11996 | 2%  |
|      | 110A | ->   | 124A     | -0.12147 | 2%  |
|      | 117A | ->   | 124A     | -0.16201 | 3%  |
|      | 118A | ->   | 124A     | -0.11192 | 1%  |
|      | 119A | ->   | 121A     | 0.61097  | 42% |
|      | 119A | ->   | 122A     | 0.12253  | 2%  |
|      | 110B | ->   | 124B     | 0.12147  | 2%  |
|      | 117B | ->   | 124B     | 0.16201  | 3%  |
|      | 118B | ->   | 124B     | 0.11192  | 1%  |
|      | 119B | ->   | 121B     | -0.61097 | 42% |
| 7    | 119B | ->   | 122B     | -0.12253 | 2%  |
|      | 118A | ->   | 121A     | 0.11574  | 1%  |
|      | 120A | ->   | 121A     | 0.68013  | 49% |
|      | 118B | ->   | 121B     | 0.11574  | 1%  |
| 8    | 120B | ->   | 121B     | 0.68013  | 49% |
|      | 115A | ->   | 121A     | -0.18447 | 4%  |
|      | 119A | ->   | 121A     | 0.47707  | 25% |
|      | 120A | ->   | 124A     | -0.44810 | 22% |
|      | 115B | ->   | 121B     | -0.18447 | 4%  |
|      | 119B | ->   | 121B     | 0.47707  | 25% |
| 9    | 120B | ->   | 124B     | -0.44810 | 22% |
|      | 113A | ->   | 124A     | -0.19129 | 4%  |
|      | 115A | ->   | 124A     | -0.13836 | 2%  |
|      | 118A | ->   | 121A     | 0.20990  | 5%  |
|      | 119A | ->   | 124A     | 0.60032  | 38% |
|      | 120A | ->   | 121A     | -0.10072 | 1%  |
|      | 113B | ->   | 124B     | -0.19129 | 4%  |
|      | 115B | ->   | 124B     | -0.13836 | 2%  |
| 10   | 118B | ->   | 121B     | 0.20990  | 5%  |
|      | 119B | ->   | 124B     | 0.60032  | 38% |
|      | 120B | ->   | 121B     | -0.10072 | 1%  |
|      | 114A | ->   | 124A     | -0.11755 | 1%  |
|      | 118A | ->   | 124A     | 0.15073  | 2%  |
|      | 119A | ->   | 121A     | 0.46574  | 23% |
|      | 120A | ->   | 124A     | 0.47667  | 24% |
| 114B | ->   | 124B | -0.11755 | 1%       |     |
| 118B | ->   | 124B | 0.15073  | 2%       |     |

|    |      |    |      |          |     |
|----|------|----|------|----------|-----|
|    | 119B | -> | 121B | 0.46574  | 23% |
|    | 120B | -> | 124B | 0.47667  | 24% |
| 11 | 115A | -> | 121A | 0.59956  | 38% |
|    | 115A | -> | 122A | 0.11914  | 2%  |
|    | 118A | -> | 121A | 0.31378  | 10% |
|    | 115B | -> | 121B | -0.59956 | 38% |
|    | 115B | -> | 122B | -0.11914 | 2%  |
|    | 118B | -> | 121B | -0.31378 | 10% |
| 12 | 115A | -> | 121A | -0.29964 | 9%  |
|    | 116A | -> | 121A | -0.11600 | 1%  |
|    | 117A | -> | 121A | 0.12853  | 2%  |
|    | 118A | -> | 121A | 0.59406  | 37% |
|    | 115B | -> | 121B | 0.29964  | 9%  |
|    | 116B | -> | 121B | 0.11600  | 1%  |
|    | 117B | -> | 121B | -0.12853 | 2%  |
|    | 118B | -> | 121B | -0.59406 | 37% |
| 13 | 118A | -> | 121A | 0.63298  | 43% |
|    | 119A | -> | 124A | -0.24930 | 7%  |
|    | 118B | -> | 121B | 0.63298  | 43% |
|    | 119B | -> | 124B | -0.24930 | 7%  |
| 14 | 115A | -> | 124A | 0.51832  | 29% |
|    | 116A | -> | 121A | 0.13541  | 2%  |
|    | 117A | -> | 121A | -0.37325 | 15% |
|    | 118A | -> | 121A | 0.17783  | 3%  |
|    | 119A | -> | 124A | 0.10158  | 1%  |
|    | 115B | -> | 124B | 0.51832  | 29% |
|    | 116B | -> | 121B | 0.13541  | 2%  |
|    | 117B | -> | 121B | -0.37325 | 15% |
|    | 118B | -> | 121B | 0.17783  | 3%  |
|    | 119B | -> | 124B | 0.10158  | 1%  |
| 15 | 116A | -> | 121A | -0.20983 | 5%  |
|    | 117A | -> | 121A | 0.63617  | 43% |
|    | 118A | -> | 121A | -0.11995 | 2%  |
|    | 120A | -> | 121A | 0.10854  | 1%  |
|    | 116B | -> | 121B | 0.20983  | 5%  |
|    | 117B | -> | 121B | -0.63617 | 43% |
|    | 118B | -> | 121B | 0.11995  | 2%  |
|    | 120B | -> | 121B | -0.10854 | 1%  |
| 16 | 110A | -> | 124A | 0.25621  | 7%  |
|    | 111A | -> | 124A | -0.21434 | 5%  |
|    | 114A | -> | 124A | -0.11868 | 1%  |
|    | 115A | -> | 124A | 0.12346  | 2%  |
|    | 116A | -> | 124A | -0.23658 | 6%  |
|    | 117A | -> | 124A | 0.45200  | 22% |
|    | 118A | -> | 124A | 0.26268  | 7%  |

|    |      |    |      |          |     |
|----|------|----|------|----------|-----|
|    | 110B | -> | 124B | 0.25621  | 7%  |
|    | 111B | -> | 124B | -0.21434 | 5%  |
|    | 114B | -> | 124B | -0.11868 | 1%  |
|    | 115B | -> | 124B | 0.12346  | 2%  |
|    | 116B | -> | 124B | -0.23658 | 6%  |
|    | 117B | -> | 124B | 0.45200  | 22% |
|    | 118B | -> | 124B | 0.26268  | 7%  |
| 17 | 115A | -> | 121A | 0.10492  | 1%  |
|    | 115A | -> | 124A | 0.39696  | 17% |
|    | 116A | -> | 121A | -0.15515 | 3%  |
|    | 117A | -> | 121A | 0.52811  | 30% |
|    | 115B | -> | 121B | 0.10492  | 1%  |
|    | 115B | -> | 124B | 0.39696  | 17% |
|    | 116B | -> | 121B | -0.15515 | 3%  |
|    | 117B | -> | 121B | 0.52811  | 30% |
| 18 | 115A | -> | 121A | 0.63636  | 45% |
|    | 119A | -> | 121A | 0.17410  | 3%  |
|    | 119A | -> | 122A | -0.11706 | 2%  |
|    | 115B | -> | 121B | 0.63636  | 45% |
|    | 119B | -> | 121B | 0.17410  | 3%  |
|    | 119B | -> | 122B | -0.11706 | 2%  |
| 19 | 114A | -> | 124A | 0.40306  | 18% |
|    | 117A | -> | 124A | 0.23774  | 6%  |
|    | 118A | -> | 124A | -0.28345 | 9%  |
|    | 119A | -> | 121A | -0.12626 | 2%  |
|    | 119A | -> | 122A | 0.32474  | 12% |
|    | 120A | -> | 124A | 0.15146  | 3%  |
|    | 114B | -> | 124B | -0.40306 | 18% |
|    | 117B | -> | 124B | -0.23774 | 6%  |
|    | 118B | -> | 124B | 0.28345  | 9%  |
|    | 119B | -> | 121B | 0.12626  | 2%  |
|    | 119B | -> | 122B | -0.32474 | 12% |
|    | 120B | -> | 124B | -0.15146 | 3%  |
| 20 | 120A | -> | 121A | 0.12036  | 2%  |
|    | 120A | -> | 122A | -0.68211 | 48% |
|    | 120B | -> | 121B | -0.12036 | 2%  |
|    | 120B | -> | 122B | 0.68211  | 48% |
| 21 | 120A | -> | 122A | 0.68442  | 50% |
|    | 120B | -> | 122B | 0.68442  | 50% |
| 22 | 114A | -> | 124A | 0.23976  | 6%  |
|    | 117A | -> | 124A | 0.14794  | 2%  |
|    | 118A | -> | 124A | -0.17552 | 3%  |
|    | 119A | -> | 121A | 0.10349  | 1%  |
|    | 119A | -> | 122A | -0.57916 | 37% |
|    | 114B | -> | 124B | -0.23976 | 6%  |

|    |      |    |      |          |     |
|----|------|----|------|----------|-----|
|    | 117B | -> | 124B | -0.14794 | 2%  |
|    | 118B | -> | 124B | 0.17552  | 3%  |
|    | 119B | -> | 121B | -0.10349 | 1%  |
|    | 119B | -> | 122B | 0.57916  | 37% |
| 23 | 116A | -> | 121A | -0.65438 | 44% |
|    | 117A | -> | 121A | -0.23771 | 6%  |
|    | 116B | -> | 121B | 0.65438  | 44% |
|    | 117B | -> | 121B | 0.23771  | 6%  |
| 24 | 116A | -> | 121A | 0.66185  | 45% |
|    | 117A | -> | 121A | 0.22479  | 5%  |
|    | 116B | -> | 121B | 0.66185  | 45% |
|    | 117B | -> | 121B | 0.22479  | 5%  |
| 25 | 115A | -> | 121A | 0.11514  | 1%  |
|    | 119A | -> | 122A | 0.67255  | 47% |
|    | 119A | -> | 123A | -0.13723 | 2%  |
|    | 115B | -> | 121B | 0.11514  | 1%  |
|    | 119B | -> | 122B | 0.67255  | 47% |
|    | 119B | -> | 123B | -0.13723 | 2%  |
| 26 | 112A | -> | 121A | -0.38703 | 18% |
|    | 112A | -> | 122A | 0.19076  | 4%  |
|    | 119A | -> | 122A | -0.10399 | 1%  |
|    | 119A | -> | 123A | 0.47617  | 27% |
|    | 112B | -> | 121B | 0.38703  | 18% |
|    | 112B | -> | 122B | -0.19076 | 4%  |
|    | 119B | -> | 122B | 0.10399  | 1%  |
|    | 119B | -> | 123B | -0.47617 | 27% |
| 27 | 118A | -> | 122A | 0.67544  | 50% |
|    | 118B | -> | 122B | -0.67544 | 50% |
| 28 | 118A | -> | 122A | 0.68449  | 50% |
|    | 118B | -> | 122B | 0.68449  | 50% |
| 29 | 118A | -> | 123A | 0.11736  | 1%  |
|    | 120A | -> | 123A | 0.68765  | 49% |
|    | 118B | -> | 123B | -0.11736 | 1%  |
|    | 120B | -> | 123B | -0.68765 | 49% |
| 30 | 118A | -> | 123A | 0.11047  | 1%  |
|    | 120A | -> | 123A | 0.69275  | 49% |
|    | 118B | -> | 123B | 0.11047  | 1%  |
|    | 120B | -> | 123B | 0.69275  | 49% |
| 31 | 112A | -> | 121A | 0.46057  | 23% |
|    | 112A | -> | 122A | -0.12133 | 2%  |
|    | 119A | -> | 123A | 0.47997  | 25% |
|    | 112B | -> | 121B | -0.46057 | 23% |
|    | 112B | -> | 122B | 0.12133  | 2%  |
|    | 119B | -> | 123B | -0.47997 | 25% |
| 32 | 119A | -> | 122A | 0.10682  | 1%  |

|    |      |    |      |          |     |
|----|------|----|------|----------|-----|
|    | 119A | -> | 123A | 0.66970  | 49% |
|    | 119B | -> | 122B | 0.10682  | 1%  |
|    | 119B | -> | 123B | 0.66970  | 49% |
| 33 | 115A | -> | 121A | 0.13210  | 2%  |
|    | 115A | -> | 122A | -0.62634 | 42% |
|    | 116A | -> | 122A | -0.13985 | 2%  |
|    | 117A | -> | 122A | 0.20246  | 4%  |
|    | 115B | -> | 121B | -0.13210 | 2%  |
|    | 115B | -> | 122B | 0.62634  | 42% |
|    | 116B | -> | 122B | 0.13985  | 2%  |
|    | 117B | -> | 122B | -0.20246 | 4%  |
| 34 | 115A | -> | 122A | -0.23247 | 6%  |
|    | 116A | -> | 122A | 0.15358  | 3%  |
|    | 117A | -> | 122A | -0.61851 | 42% |
|    | 115B | -> | 122B | 0.23247  | 6%  |
|    | 116B | -> | 122B | -0.15358 | 3%  |
|    | 117B | -> | 122B | 0.61851  | 42% |
| 35 | 116A | -> | 122A | -0.20812 | 5%  |
|    | 117A | -> | 122A | 0.64914  | 45% |
|    | 116B | -> | 122B | -0.20812 | 5%  |
|    | 117B | -> | 122B | 0.64914  | 45% |
| 36 | 115A | -> | 122A | 0.67220  | 48% |
|    | 115A | -> | 123A | 0.10252  | 1%  |
|    | 117A | -> | 122A | 0.10891  | 1%  |
|    | 115B | -> | 122B | 0.67220  | 48% |
|    | 115B | -> | 123B | 0.10252  | 1%  |
|    | 117B | -> | 122B | 0.10891  | 1%  |
| 37 | 114A | -> | 121A | 0.67421  | 48% |
|    | 118A | -> | 123A | 0.12280  | 2%  |
|    | 114B | -> | 121B | -0.67421 | 48% |
|    | 118B | -> | 123B | -0.12280 | 2%  |
| 38 | 114A | -> | 121A | -0.13270 | 2%  |
|    | 115A | -> | 123A | 0.12400  | 2%  |
|    | 117A | -> | 122A | -0.10657 | 1%  |
|    | 118A | -> | 122A | -0.10072 | 1%  |
|    | 118A | -> | 123A | 0.64845  | 44% |
|    | 114B | -> | 121B | 0.13270  | 2%  |
|    | 115B | -> | 123B | -0.12400 | 2%  |
|    | 117B | -> | 122B | 0.10657  | 1%  |
|    | 118B | -> | 122B | 0.10072  | 1%  |
|    | 118B | -> | 123B | -0.64845 | 44% |
| 39 | 114A | -> | 121A | 0.53301  | 30% |
|    | 118A | -> | 123A | 0.43179  | 20% |
|    | 114B | -> | 121B | 0.53301  | 30% |
|    | 118B | -> | 123B | 0.43179  | 20% |

|    |      |    |      |          |     |
|----|------|----|------|----------|-----|
| 40 | 114A | -> | 121A | -0.44230 | 21% |
|    | 118A | -> | 123A | 0.51973  | 29% |
|    | 114B | -> | 121B | -0.44230 | 21% |
|    | 118B | -> | 123B | 0.51973  | 29% |
| 41 | 116A | -> | 122A | -0.59391 | 38% |
|    | 116A | -> | 123A | -0.11135 | 1%  |
|    | 116A | -> | 128A | 0.18425  | 4%  |
|    | 117A | -> | 122A | -0.17735 | 3%  |
|    | 118A | -> | 129A | 0.18782  | 4%  |
|    | 116B | -> | 122B | 0.59391  | 38% |
|    | 116B | -> | 123B | 0.11135  | 1%  |
|    | 116B | -> | 128B | -0.18425 | 4%  |
|    | 117B | -> | 122B | 0.17735  | 3%  |
|    | 118B | -> | 129B | -0.18782 | 4%  |
| 42 | 116A | -> | 122A | 0.65609  | 46% |
|    | 117A | -> | 122A | 0.19828  | 4%  |
|    | 116B | -> | 122B | 0.65609  | 46% |
|    | 117B | -> | 122B | 0.19828  | 4%  |
| 43 | 112A | -> | 121A | 0.20071  | 4%  |
|    | 113A | -> | 121A | -0.14044 | 2%  |
|    | 115A | -> | 122A | 0.10059  | 1%  |
|    | 115A | -> | 123A | 0.61350  | 41% |
|    | 118A | -> | 123A | -0.12630 | 2%  |
|    | 112B | -> | 121B | -0.20071 | 4%  |
|    | 113B | -> | 121B | 0.14044  | 2%  |
|    | 115B | -> | 122B | -0.10059 | 1%  |
|    | 115B | -> | 123B | -0.61350 | 41% |
|    | 118B | -> | 123B | 0.12630  | 2%  |
| 44 | 113A | -> | 121A | -0.65941 | 48% |
|    | 115A | -> | 123A | -0.14661 | 2%  |
|    | 113B | -> | 121B | 0.65941  | 48% |
|    | 115B | -> | 123B | 0.14661  | 2%  |
| 45 | 115A | -> | 123A | 0.10347  | 1%  |
|    | 116A | -> | 123A | -0.20433 | 4%  |
|    | 117A | -> | 123A | 0.65138  | 44% |
|    | 115B | -> | 123B | -0.10347 | 1%  |
|    | 116B | -> | 123B | 0.20433  | 4%  |
|    | 117B | -> | 123B | -0.65138 | 44% |
| 46 | 116A | -> | 122A | 0.27287  | 8%  |
|    | 116A | -> | 128A | 0.33693  | 13% |
|    | 117A | -> | 128A | 0.12707  | 2%  |
|    | 118A | -> | 124A | -0.17042 | 3%  |
|    | 118A | -> | 129A | 0.45571  | 24% |
|    | 116B | -> | 122B | -0.27287 | 8%  |
|    | 116B | -> | 128B | -0.33693 | 13% |



|    |      |    |      |          |     |
|----|------|----|------|----------|-----|
|    | 117B | -> | 128B | -0.12707 | 2%  |
|    | 118B | -> | 124B | 0.17042  | 3%  |
|    | 118B | -> | 129B | -0.45571 | 24% |
| 47 | 113A | -> | 121A | 0.45378  | 21% |
|    | 115A | -> | 123A | -0.11906 | 1%  |
|    | 116A | -> | 123A | -0.17229 | 3%  |
|    | 117A | -> | 123A | 0.47996  | 24% |
|    | 113B | -> | 121B | 0.45378  | 21% |
|    | 115B | -> | 123B | -0.11906 | 1%  |
|    | 116B | -> | 123B | -0.17229 | 3%  |
|    | 117B | -> | 123B | 0.47996  | 24% |
| 48 | 113A | -> | 121A | 0.48567  | 25% |
|    | 115A | -> | 123A | -0.11879 | 1%  |
|    | 116A | -> | 123A | 0.12840  | 2%  |
|    | 117A | -> | 123A | -0.45530 | 22% |
|    | 113B | -> | 121B | 0.48567  | 25% |
|    | 115B | -> | 123B | -0.11879 | 1%  |
|    | 116B | -> | 123B | 0.12840  | 2%  |
|    | 117B | -> | 123B | -0.45530 | 22% |
| 49 | 112A | -> | 121A | -0.10300 | 1%  |
|    | 113A | -> | 121A | 0.12471  | 2%  |
|    | 115A | -> | 123A | 0.63872  | 44% |
|    | 118A | -> | 124A | -0.15722 | 3%  |
|    | 112B | -> | 121B | -0.10300 | 1%  |
|    | 113B | -> | 121B | 0.12471  | 2%  |
|    | 115B | -> | 123B | 0.63872  | 44% |
|    | 118B | -> | 124B | -0.15722 | 3%  |
| 50 | 114A | -> | 124A | 0.41226  | 19% |
|    | 116A | -> | 128A | 0.12231  | 2%  |
|    | 118A | -> | 124A | 0.49045  | 27% |
|    | 118A | -> | 129A | 0.13302  | 2%  |
|    | 114B | -> | 124B | -0.41226 | 19% |
|    | 116B | -> | 128B | -0.12231 | 2%  |
|    | 118B | -> | 124B | -0.49045 | 27% |
|    | 118B | -> | 129B | -0.13302 | 2%  |
| 51 | 113A | -> | 121A | 0.15352  | 3%  |
|    | 114A | -> | 124A | 0.11923  | 2%  |
|    | 115A | -> | 123A | 0.13982  | 2%  |
|    | 117A | -> | 124A | -0.24094 | 6%  |
|    | 118A | -> | 124A | 0.56037  | 34% |
|    | 120A | -> | 124A | -0.17001 | 3%  |
|    | 113B | -> | 121B | 0.15352  | 3%  |
|    | 114B | -> | 124B | 0.11923  | 2%  |
|    | 115B | -> | 123B | 0.13982  | 2%  |
|    | 117B | -> | 124B | -0.24094 | 6%  |

|    |      |    |      |          |     |
|----|------|----|------|----------|-----|
|    | 118B | -> | 124B | 0.56037  | 34% |
|    | 120B | -> | 124B | -0.17001 | 3%  |
| 52 | 112A | -> | 121A | 0.12073  | 2%  |
|    | 112A | -> | 122A | 0.30768  | 10% |
|    | 115A | -> | 123A | -0.10792 | 1%  |
|    | 116A | -> | 122A | -0.11207 | 1%  |
|    | 116A | -> | 123A | 0.54611  | 32% |
|    | 117A | -> | 123A | 0.17667  | 3%  |
|    | 112B | -> | 121B | -0.12073 | 2%  |
|    | 112B | -> | 122B | -0.30768 | 10% |
|    | 115B | -> | 123B | 0.10792  | 1%  |
|    | 116B | -> | 122B | 0.11207  | 1%  |
|    | 116B | -> | 123B | -0.54611 | 32% |
|    | 117B | -> | 123B | -0.17667 | 3%  |
| 53 | 116A | -> | 122A | -0.10073 | 1%  |
|    | 116A | -> | 123A | 0.65995  | 44% |
|    | 117A | -> | 123A | 0.21036  | 5%  |
|    | 116B | -> | 122B | -0.10073 | 1%  |
|    | 116B | -> | 123B | 0.65995  | 44% |
|    | 117B | -> | 123B | 0.21036  | 5%  |
| 54 | 106A | -> | 123A | 0.11364  | 1%  |
|    | 107A | -> | 123A | -0.10602 | 1%  |
|    | 112A | -> | 121A | -0.19960 | 4%  |
|    | 112A | -> | 122A | -0.51540 | 28% |
|    | 116A | -> | 123A | 0.35319  | 13% |
|    | 117A | -> | 123A | 0.11384  | 1%  |
|    | 106B | -> | 123B | -0.11364 | 1%  |
|    | 107B | -> | 123B | 0.10602  | 1%  |
|    | 112B | -> | 121B | 0.19960  | 4%  |
|    | 112B | -> | 122B | 0.51540  | 28% |
|    | 116B | -> | 123B | -0.35319 | 13% |
|    | 117B | -> | 123B | -0.11384 | 1%  |
| 55 | 106A | -> | 121A | 0.29973  | 10% |
|    | 106A | -> | 122A | -0.15181 | 3%  |
|    | 107A | -> | 122A | 0.27003  | 8%  |
|    | 108A | -> | 123A | -0.15306 | 3%  |
|    | 109A | -> | 123A | 0.16664  | 3%  |
|    | 112A | -> | 123A | 0.31159  | 11% |
|    | 112A | -> | 125A | -0.23113 | 6%  |
|    | 113A | -> | 123A | -0.10364 | 1%  |
|    | 115A | -> | 123A | 0.13082  | 2%  |
|    | 119A | -> | 125A | 0.13552  | 2%  |
|    | 106B | -> | 121B | -0.29973 | 10% |
|    | 106B | -> | 122B | 0.15181  | 3%  |
|    | 107B | -> | 122B | -0.27003 | 8%  |

|    |      |    |      |          |     |
|----|------|----|------|----------|-----|
|    | 108B | -> | 123B | 0.15306  | 3%  |
|    | 109B | -> | 123B | -0.16664 | 3%  |
|    | 112B | -> | 123B | -0.31159 | 11% |
|    | 112B | -> | 125B | 0.23113  | 6%  |
|    | 113B | -> | 123B | 0.10364  | 1%  |
|    | 115B | -> | 123B | -0.13082 | 2%  |
|    | 119B | -> | 125B | -0.13552 | 2%  |
| 56 | 110A | -> | 121A | -0.22133 | 5%  |
|    | 111A | -> | 121A | 0.53623  | 31% |
|    | 114A | -> | 122A | 0.36046  | 14% |
|    | 110B | -> | 121B | 0.22133  | 5%  |
|    | 111B | -> | 121B | -0.53623 | 31% |
|    | 114B | -> | 122B | -0.36046 | 14% |
| 57 | 111A | -> | 121A | -0.36780 | 14% |
|    | 114A | -> | 122A | 0.58007  | 36% |
|    | 111B | -> | 121B | 0.36780  | 14% |
|    | 114B | -> | 122B | -0.58007 | 36% |
| 58 | 110A | -> | 121A | -0.12092 | 2%  |
|    | 111A | -> | 121A | 0.20117  | 4%  |
|    | 114A | -> | 122A | 0.64946  | 44% |
|    | 110B | -> | 121B | -0.12092 | 2%  |
|    | 111B | -> | 121B | 0.20117  | 4%  |
|    | 114B | -> | 122B | 0.64946  | 44% |
| 59 | 110A | -> | 121A | -0.23786 | 6%  |
|    | 111A | -> | 121A | 0.60790  | 38% |
|    | 114A | -> | 122A | -0.24141 | 6%  |
|    | 110B | -> | 121B | -0.23786 | 6%  |
|    | 111B | -> | 121B | 0.60790  | 38% |
|    | 114B | -> | 122B | -0.24141 | 6%  |
| 60 | 116A | -> | 124A | 0.50170  | 27% |
|    | 116A | -> | 129A | -0.12863 | 2%  |
|    | 117A | -> | 124A | 0.24979  | 7%  |
|    | 118A | -> | 125A | -0.11742 | 1%  |
|    | 118A | -> | 128A | -0.34288 | 13% |
|    | 116B | -> | 124B | -0.50170 | 27% |
|    | 116B | -> | 129B | 0.12863  | 2%  |
|    | 117B | -> | 124B | -0.24979 | 7%  |
|    | 118B | -> | 125B | 0.11742  | 1%  |
|    | 118B | -> | 128B | 0.34288  | 13% |
| 61 | 112A | -> | 121A | 0.57119  | 36% |
|    | 112A | -> | 122A | 0.14938  | 2%  |
|    | 113A | -> | 122A | 0.30557  | 10% |
|    | 115A | -> | 123A | 0.10396  | 1%  |
|    | 112B | -> | 121B | 0.57119  | 36% |
|    | 112B | -> | 122B | 0.14938  | 2%  |

|    |      |    |      |          |     |
|----|------|----|------|----------|-----|
|    | 113B | -> | 122B | 0.30557  | 10% |
|    | 115B | -> | 123B | 0.10396  | 1%  |
| 62 | 107A | -> | 121A | -0.11986 | 2%  |
|    | 107A | -> | 123A | -0.15379 | 3%  |
|    | 108A | -> | 121A | 0.32556  | 13% |
|    | 109A | -> | 121A | -0.36938 | 17% |
|    | 112A | -> | 123A | 0.11849  | 2%  |
|    | 113A | -> | 121A | -0.10028 | 1%  |
|    | 113A | -> | 122A | 0.23278  | 7%  |
|    | 119A | -> | 125A | -0.18623 | 4%  |
|    | 107B | -> | 121B | 0.11986  | 2%  |
|    | 107B | -> | 123B | 0.15379  | 3%  |
|    | 108B | -> | 121B | -0.32556 | 13% |
|    | 109B | -> | 121B | 0.36938  | 17% |
|    | 112B | -> | 123B | -0.11849 | 2%  |
|    | 113B | -> | 121B | 0.10028  | 1%  |
|    | 113B | -> | 122B | -0.23278 | 7%  |
|    | 119B | -> | 125B | 0.18623  | 4%  |
| 63 | 106A | -> | 121A | 0.11055  | 1%  |
|    | 112A | -> | 123A | -0.17770 | 4%  |
|    | 113A | -> | 122A | 0.10899  | 1%  |
|    | 116A | -> | 124A | -0.30975 | 11% |
|    | 117A | -> | 124A | -0.15087 | 3%  |
|    | 118A | -> | 125A | -0.14566 | 2%  |
|    | 118A | -> | 128A | -0.43033 | 22% |
|    | 118A | -> | 129A | 0.10269  | 1%  |
|    | 119A | -> | 125A | 0.19539  | 4%  |
|    | 106B | -> | 121B | -0.11055 | 1%  |
|    | 112B | -> | 123B | 0.17770  | 4%  |
|    | 113B | -> | 122B | -0.10899 | 1%  |
|    | 116B | -> | 124B | 0.30975  | 11% |
|    | 117B | -> | 124B | 0.15087  | 3%  |
|    | 118B | -> | 125B | 0.14566  | 2%  |
|    | 118B | -> | 128B | 0.43033  | 22% |
|    | 118B | -> | 129B | -0.10269 | 1%  |
|    | 119B | -> | 125B | -0.19539 | 4%  |
| 64 | 116A | -> | 124A | 0.60525  | 39% |
|    | 117A | -> | 124A | 0.33003  | 11% |
|    | 116B | -> | 124B | 0.60525  | 39% |
|    | 117B | -> | 124B | 0.33003  | 11% |
| 65 | 106A | -> | 121A | -0.21735 | 6%  |
|    | 112A | -> | 123A | 0.35296  | 15% |
|    | 113A | -> | 122A | -0.33842 | 14% |
|    | 116A | -> | 124A | -0.12596 | 2%  |
|    | 118A | -> | 125A | -0.10163 | 1%  |

|    |      |    |      |          |     |
|----|------|----|------|----------|-----|
|    | 118A | -> | 128A | -0.20864 | 5%  |
|    | 119A | -> | 125A | -0.25969 | 8%  |
|    | 106B | -> | 121B | 0.21735  | 6%  |
|    | 112B | -> | 123B | -0.35296 | 15% |
|    | 113B | -> | 122B | 0.33842  | 14% |
|    | 116B | -> | 124B | 0.12596  | 2%  |
|    | 118B | -> | 125B | 0.10163  | 1%  |
|    | 118B | -> | 128B | 0.20864  | 5%  |
|    | 119B | -> | 125B | 0.25969  | 8%  |
| 66 | 110A | -> | 121A | 0.60606  | 40% |
|    | 111A | -> | 121A | 0.19720  | 4%  |
|    | 114A | -> | 123A | -0.10998 | 1%  |
|    | 120A | -> | 125A | -0.18915 | 4%  |
|    | 110B | -> | 121B | -0.60606 | 40% |
|    | 111B | -> | 121B | -0.19720 | 4%  |
|    | 114B | -> | 123B | 0.10998  | 1%  |
|    | 120B | -> | 125B | 0.18915  | 4%  |
| 67 | 106A | -> | 121A | 0.16822  | 3%  |
|    | 108A | -> | 121A | 0.17146  | 3%  |
|    | 109A | -> | 121A | -0.20860 | 5%  |
|    | 112A | -> | 123A | -0.29714 | 10% |
|    | 113A | -> | 122A | -0.49280 | 27% |
|    | 120A | -> | 125A | 0.12261  | 2%  |
|    | 106B | -> | 121B | -0.16822 | 3%  |
|    | 108B | -> | 121B | -0.17146 | 3%  |
|    | 109B | -> | 121B | 0.20860  | 5%  |
|    | 112B | -> | 123B | 0.29714  | 10% |
|    | 113B | -> | 122B | 0.49280  | 27% |
|    | 120B | -> | 125B | -0.12261 | 2%  |
| 68 | 110A | -> | 121A | -0.16258 | 3%  |
|    | 113A | -> | 122A | -0.10395 | 1%  |
|    | 118A | -> | 125A | -0.10820 | 1%  |
|    | 120A | -> | 125A | -0.63533 | 43% |
|    | 120A | -> | 126A | 0.12369  | 2%  |
|    | 110B | -> | 121B | 0.16258  | 3%  |
|    | 113B | -> | 122B | 0.10395  | 1%  |
|    | 118B | -> | 125B | 0.10820  | 1%  |
|    | 120B | -> | 125B | 0.63533  | 43% |
|    | 120B | -> | 126B | -0.12369 | 2%  |
| 69 | 110A | -> | 121A | -0.12081 | 2%  |
|    | 120A | -> | 125A | 0.67095  | 47% |
|    | 120A | -> | 126A | -0.13009 | 2%  |
|    | 110B | -> | 121B | -0.12081 | 2%  |
|    | 120B | -> | 125B | 0.67095  | 47% |
|    | 120B | -> | 126B | -0.13009 | 2%  |

|      |      |      |      |          |         |
|------|------|------|------|----------|---------|
| 70   | 112A | ->   | 121A | -0.29222 | 9%      |
|      | 113A | ->   | 122A | 0.56177  | 33%     |
|      | 113A | ->   | 123A | -0.10289 | 1%      |
|      | 119A | ->   | 125A | 0.24716  | 6%      |
|      | 112B | ->   | 121B | -0.29222 | 9%      |
|      | 113B | ->   | 122B | 0.56177  | 33%     |
|      | 113B | ->   | 123B | -0.10289 | 1%      |
|      | 119B | ->   | 125B | 0.24716  | 6%      |
|      | 71   | 110A | ->   | 121A     | 0.62638 |
| 111A |      | ->   | 121A | 0.28085  | 8%      |
| 120A |      | ->   | 125A | 0.11096  | 1%      |
| 110B |      | ->   | 121B | 0.62638  | 41%     |
| 111B |      | ->   | 121B | 0.28085  | 8%      |
| 120B |      | ->   | 125B | 0.11096  | 1%      |
| 72   | 116A | ->   | 125A | -0.12713 | 2%      |
|      | 116A | ->   | 128A | -0.47191 | 26%     |
|      | 117A | ->   | 128A | -0.16537 | 3%      |
|      | 118A | ->   | 129A | 0.40229  | 19%     |
|      | 116B | ->   | 125B | 0.12713  | 2%      |
|      | 116B | ->   | 128B | 0.47191  | 26%     |
|      | 117B | ->   | 128B | 0.16537  | 3%      |
|      | 118B | ->   | 129B | -0.40229 | 19%     |
| 73   | 107A | ->   | 121A | 0.10693  | 1%      |
|      | 113A | ->   | 122A | 0.11685  | 2%      |
|      | 113A | ->   | 124A | -0.46694 | 27%     |
|      | 116A | ->   | 128A | -0.10113 | 1%      |
|      | 119A | ->   | 124A | -0.19657 | 5%      |
|      | 119A | ->   | 125A | -0.32770 | 13%     |
|      | 107B | ->   | 121B | -0.10693 | 1%      |
|      | 113B | ->   | 122B | -0.11685 | 2%      |
|      | 113B | ->   | 124B | 0.46694  | 27%     |
|      | 116B | ->   | 128B | 0.10113  | 1%      |
|      | 119B | ->   | 124B | 0.19657  | 5%      |
|      | 119B | ->   | 125B | 0.32770  | 13%     |
| 74   | 106A | ->   | 121A | 0.13810  | 2%      |
|      | 107A | ->   | 121A | 0.10580  | 1%      |
|      | 112A | ->   | 123A | -0.11638 | 2%      |
|      | 113A | ->   | 122A | 0.14725  | 3%      |
|      | 113A | ->   | 124A | 0.39715  | 18%     |
|      | 119A | ->   | 124A | 0.15435  | 3%      |
|      | 119A | ->   | 125A | -0.42434 | 21%     |
|      | 106B | ->   | 121B | -0.13810 | 2%      |
|      | 107B | ->   | 121B | -0.10580 | 1%      |
|      | 112B | ->   | 123B | 0.11638  | 2%      |
|      | 113B | ->   | 122B | -0.14725 | 3%      |

|    |      |    |      |          |     |
|----|------|----|------|----------|-----|
|    | 113B | -> | 124B | -0.39715 | 18% |
|    | 119B | -> | 124B | -0.15435 | 3%  |
|    | 119B | -> | 125B | 0.42434  | 21% |
| 75 | 113A | -> | 122A | -0.24642 | 6%  |
|    | 119A | -> | 125A | 0.62744  | 42% |
|    | 119A | -> | 126A | -0.12032 | 2%  |
|    | 113B | -> | 122B | -0.24642 | 6%  |
|    | 119B | -> | 125B | 0.62744  | 42% |
|    | 119B | -> | 126B | -0.12032 | 2%  |
| 76 | 106A | -> | 121A | 0.25927  | 8%  |
|    | 107A | -> | 121A | -0.47096 | 25% |
|    | 109A | -> | 121A | 0.10094  | 1%  |
|    | 112A | -> | 125A | -0.16708 | 3%  |
|    | 113A | -> | 123A | 0.11994  | 2%  |
|    | 114A | -> | 123A | -0.31251 | 11% |
|    | 106B | -> | 121B | -0.25927 | 8%  |
|    | 107B | -> | 121B | 0.47096  | 25% |
|    | 109B | -> | 121B | -0.10094 | 1%  |
|    | 112B | -> | 125B | 0.16708  | 3%  |
|    | 113B | -> | 123B | -0.11994 | 2%  |
|    | 114B | -> | 123B | 0.31251  | 11% |
| 77 | 107A | -> | 121A | -0.25705 | 7%  |
|    | 110A | -> | 121A | 0.12296  | 2%  |
|    | 113A | -> | 123A | 0.15730  | 3%  |
|    | 114A | -> | 123A | 0.58684  | 38% |
|    | 107B | -> | 121B | 0.25705  | 7%  |
|    | 110B | -> | 121B | -0.12296 | 2%  |
|    | 113B | -> | 123B | -0.15730 | 3%  |
|    | 114B | -> | 123B | -0.58684 | 38% |
| 78 | 114A | -> | 123A | 0.69438  | 50% |
|    | 114B | -> | 123B | 0.69438  | 50% |
| 79 | 118A | -> | 125A | 0.67086  | 48% |
|    | 118A | -> | 126A | -0.13038 | 2%  |
|    | 118B | -> | 125B | 0.67086  | 48% |
|    | 118B | -> | 126B | -0.13038 | 2%  |
| 80 | 120A | -> | 125A | -0.13425 | 2%  |
|    | 120A | -> | 126A | -0.67373 | 48% |
|    | 120B | -> | 125B | 0.13425  | 2%  |
|    | 120B | -> | 126B | 0.67373  | 48% |
| 81 | 113A | -> | 123A | -0.10937 | 1%  |
|    | 120A | -> | 125A | 0.12725  | 2%  |
|    | 120A | -> | 126A | 0.67720  | 47% |
|    | 113B | -> | 123B | -0.10937 | 1%  |
|    | 120B | -> | 125B | 0.12725  | 2%  |
|    | 120B | -> | 126B | 0.67720  | 47% |

|    |      |    |      |          |     |
|----|------|----|------|----------|-----|
| 82 | 107A | -> | 121A | -0.18080 | 4%  |
|    | 113A | -> | 123A | -0.45420 | 23% |
|    | 118A | -> | 125A | 0.43373  | 21% |
|    | 118A | -> | 128A | -0.13698 | 2%  |
|    | 107B | -> | 121B | 0.18080  | 4%  |
|    | 113B | -> | 123B | 0.45420  | 23% |
|    | 118B | -> | 125B | -0.43373 | 21% |
|    | 118B | -> | 128B | 0.13698  | 2%  |
| 83 | 107A | -> | 121A | 0.16968  | 3%  |
|    | 113A | -> | 123A | 0.44479  | 22% |
|    | 118A | -> | 125A | 0.45432  | 23% |
|    | 118A | -> | 128A | -0.14246 | 2%  |
|    | 107B | -> | 121B | -0.16968 | 3%  |
|    | 113B | -> | 123B | -0.44479 | 22% |
|    | 118B | -> | 125B | -0.45432 | 23% |
|    | 118B | -> | 128B | 0.14246  | 2%  |
| 84 | 113A | -> | 123A | 0.46736  | 23% |
|    | 113A | -> | 124A | -0.41518 | 18% |
|    | 114A | -> | 124A | 0.19614  | 4%  |
|    | 119A | -> | 124A | -0.15468 | 3%  |
|    | 119A | -> | 126A | 0.12243  | 2%  |
|    | 113B | -> | 123B | 0.46736  | 23% |
|    | 113B | -> | 124B | -0.41518 | 18% |
|    | 114B | -> | 124B | 0.19614  | 4%  |
|    | 119B | -> | 124B | -0.15468 | 3%  |
|    | 119B | -> | 126B | 0.12243  | 2%  |
| 85 | 113A | -> | 123A | 0.48153  | 25% |
|    | 113A | -> | 124A | 0.41102  | 18% |
|    | 119A | -> | 124A | 0.14484  | 2%  |
|    | 119A | -> | 126A | -0.19773 | 4%  |
|    | 113B | -> | 123B | 0.48153  | 25% |
|    | 113B | -> | 124B | 0.41102  | 18% |
|    | 119B | -> | 124B | 0.14484  | 2%  |
|    | 119B | -> | 126B | -0.19773 | 4%  |
| 86 | 111A | -> | 124A | 0.11226  | 1%  |
|    | 119A | -> | 125A | -0.13252 | 2%  |
|    | 119A | -> | 126A | -0.66675 | 47% |
|    | 111B | -> | 124B | -0.11226 | 1%  |
|    | 119B | -> | 125B | 0.13252  | 2%  |
|    | 119B | -> | 126B | 0.66675  | 47% |
| 87 | 110A | -> | 124A | -0.24832 | 7%  |
|    | 111A | -> | 124A | 0.49080  | 27% |
|    | 116A | -> | 124A | -0.20502 | 5%  |
|    | 117A | -> | 124A | 0.26977  | 8%  |
|    | 119A | -> | 126A | 0.15185  | 3%  |



|    |      |    |      |          |     |
|----|------|----|------|----------|-----|
|    | 110B | -> | 124B | 0.24832  | 7%  |
|    | 111B | -> | 124B | -0.49080 | 27% |
|    | 116B | -> | 124B | 0.20502  | 5%  |
|    | 117B | -> | 124B | -0.26977 | 8%  |
|    | 119B | -> | 126B | -0.15185 | 3%  |
| 88 | 113A | -> | 124A | 0.21819  | 5%  |
|    | 119A | -> | 125A | 0.11905  | 1%  |
|    | 119A | -> | 126A | 0.64590  | 44% |
|    | 113B | -> | 124B | 0.21819  | 5%  |
|    | 119B | -> | 125B | 0.11905  | 1%  |
|    | 119B | -> | 126B | 0.64590  | 44% |
| 89 | 108A | -> | 121A | -0.17653 | 4%  |
|    | 109A | -> | 121A | 0.22716  | 6%  |
|    | 112A | -> | 121A | -0.16355 | 3%  |
|    | 112A | -> | 122A | 0.53611  | 33% |
|    | 115A | -> | 125A | 0.19952  | 5%  |
|    | 108B | -> | 121B | -0.17653 | 4%  |
|    | 109B | -> | 121B | 0.22716  | 6%  |
|    | 112B | -> | 121B | -0.16355 | 3%  |
|    | 112B | -> | 122B | 0.53611  | 33% |
|    | 115B | -> | 125B | 0.19952  | 5%  |
| 90 | 116A | -> | 129A | -0.21642 | 5%  |
|    | 117A | -> | 129A | -0.10478 | 1%  |
|    | 118A | -> | 126A | 0.60516  | 41% |
|    | 120A | -> | 129A | -0.15922 | 3%  |
|    | 116B | -> | 129B | 0.21642  | 5%  |
|    | 117B | -> | 129B | 0.10478  | 1%  |
|    | 118B | -> | 126B | -0.60516 | 41% |
|    | 120B | -> | 129B | 0.15922  | 3%  |
| 91 | 118A | -> | 125A | 0.12501  | 2%  |
|    | 118A | -> | 126A | 0.68188  | 48% |
|    | 118B | -> | 125B | 0.12501  | 2%  |
|    | 118B | -> | 126B | 0.68188  | 48% |
| 92 | 115A | -> | 125A | -0.20132 | 4%  |
|    | 116A | -> | 125A | -0.12751 | 2%  |
|    | 116A | -> | 129A | -0.33525 | 12% |
|    | 117A | -> | 125A | 0.31137  | 11% |
|    | 117A | -> | 129A | -0.15035 | 2%  |
|    | 118A | -> | 126A | -0.30700 | 10% |
|    | 118A | -> | 128A | 0.12443  | 2%  |
|    | 120A | -> | 129A | -0.24478 | 7%  |
|    | 115B | -> | 125B | 0.20132  | 4%  |
|    | 116B | -> | 125B | 0.12751  | 2%  |
|    | 116B | -> | 129B | 0.33525  | 12% |
|    | 117B | -> | 125B | -0.31137 | 11% |

|    |      |    |      |          |     |
|----|------|----|------|----------|-----|
|    | 117B | -> | 129B | 0.15035  | 2%  |
|    | 118B | -> | 126B | 0.30700  | 10% |
|    | 118B | -> | 128B | -0.12443 | 2%  |
|    | 120B | -> | 129B | 0.24478  | 7%  |
| 93 | 115A | -> | 125A | -0.26171 | 8%  |
|    | 116A | -> | 125A | -0.14930 | 2%  |
|    | 116A | -> | 129A | 0.34847  | 14% |
|    | 117A | -> | 125A | 0.42226  | 20% |
|    | 117A | -> | 129A | 0.13946  | 2%  |
|    | 118A | -> | 128A | -0.14081 | 2%  |
|    | 120A | -> | 129A | 0.14043  | 2%  |
|    | 115B | -> | 125B | 0.26171  | 8%  |
|    | 116B | -> | 125B | 0.14930  | 2%  |
|    | 116B | -> | 129B | -0.34847 | 14% |
|    | 117B | -> | 125B | -0.42226 | 20% |
|    | 117B | -> | 129B | -0.13946 | 2%  |
|    | 118B | -> | 128B | 0.14081  | 2%  |
|    | 120B | -> | 129B | -0.14043 | 2%  |
| 94 | 116A | -> | 125A | -0.19761 | 4%  |
|    | 117A | -> | 125A | 0.64037  | 44% |
|    | 117A | -> | 126A | -0.13012 | 2%  |
|    | 116B | -> | 125B | -0.19761 | 4%  |
|    | 117B | -> | 125B | 0.64037  | 44% |
|    | 117B | -> | 126B | -0.13012 | 2%  |
| 95 | 108A | -> | 122A | -0.10357 | 1%  |
|    | 109A | -> | 122A | 0.12452  | 2%  |
|    | 115A | -> | 125A | -0.53074 | 32% |
|    | 115A | -> | 126A | 0.10558  | 1%  |
|    | 117A | -> | 125A | -0.34194 | 13% |
|    | 108B | -> | 122B | 0.10357  | 1%  |
|    | 109B | -> | 122B | -0.12452 | 2%  |
|    | 115B | -> | 125B | 0.53074  | 32% |
|    | 115B | -> | 126B | -0.10558 | 1%  |
|    | 117B | -> | 125B | 0.34194  | 13% |
| 96 | 111A | -> | 124A | -0.12065 | 2%  |
|    | 116A | -> | 129A | 0.29858  | 10% |
|    | 117A | -> | 125A | -0.11143 | 1%  |
|    | 120A | -> | 128A | 0.26273  | 8%  |
|    | 120A | -> | 129A | -0.51525 | 29% |
|    | 111B | -> | 124B | 0.12065  | 2%  |
|    | 116B | -> | 129B | -0.29858 | 10% |
|    | 117B | -> | 125B | 0.11143  | 1%  |
|    | 120B | -> | 128B | -0.26273 | 8%  |
|    | 120B | -> | 129B | 0.51525  | 29% |
| 97 | 107A | -> | 121A | -0.10294 | 1%  |

|    |      |    |      |          |     |
|----|------|----|------|----------|-----|
|    | 110A | -> | 124A | -0.26842 | 8%  |
|    | 111A | -> | 124A | 0.29694  | 10% |
|    | 112A | -> | 121A | 0.10641  | 1%  |
|    | 112A | -> | 122A | -0.24417 | 7%  |
|    | 113A | -> | 124A | 0.15054  | 3%  |
|    | 114A | -> | 124A | 0.19919  | 5%  |
|    | 115A | -> | 125A | 0.20131  | 5%  |
|    | 116A | -> | 124A | -0.16558 | 3%  |
|    | 117A | -> | 124A | 0.22382  | 6%  |
|    | 118A | -> | 124A | 0.10852  | 1%  |
|    | 107B | -> | 121B | -0.10294 | 1%  |
|    | 110B | -> | 124B | -0.26842 | 8%  |
|    | 111B | -> | 124B | 0.29694  | 10% |
|    | 112B | -> | 121B | 0.10641  | 1%  |
|    | 112B | -> | 122B | -0.24417 | 7%  |
|    | 113B | -> | 124B | 0.15054  | 3%  |
|    | 114B | -> | 124B | 0.19919  | 5%  |
|    | 115B | -> | 125B | 0.20131  | 5%  |
|    | 116B | -> | 124B | -0.16558 | 3%  |
|    | 117B | -> | 124B | 0.22382  | 6%  |
|    | 118B | -> | 124B | 0.10852  | 1%  |
| 98 | 107A | -> | 121A | -0.14086 | 2%  |
|    | 110A | -> | 124A | 0.13893  | 2%  |
|    | 111A | -> | 124A | -0.17661 | 3%  |
|    | 112A | -> | 122A | -0.11715 | 1%  |
|    | 112A | -> | 123A | -0.21010 | 5%  |
|    | 115A | -> | 125A | 0.54495  | 32% |
|    | 115A | -> | 126A | -0.10565 | 1%  |
|    | 117A | -> | 124A | -0.11643 | 1%  |
|    | 117A | -> | 125A | 0.11166  | 1%  |
|    | 107B | -> | 121B | -0.14086 | 2%  |
|    | 110B | -> | 124B | 0.13893  | 2%  |
|    | 111B | -> | 124B | -0.17661 | 3%  |
|    | 112B | -> | 122B | -0.11715 | 1%  |
|    | 112B | -> | 123B | -0.21010 | 5%  |
|    | 115B | -> | 125B | 0.54495  | 32% |
|    | 115B | -> | 126B | -0.10565 | 1%  |
|    | 117B | -> | 124B | -0.11643 | 1%  |
|    | 117B | -> | 125B | 0.11166  | 1%  |
| 99 | 107A | -> | 123A | -0.20102 | 5%  |
|    | 108A | -> | 121A | -0.14014 | 2%  |
|    | 108A | -> | 122A | 0.29395  | 10% |
|    | 108A | -> | 123A | -0.13124 | 2%  |
|    | 109A | -> | 121A | 0.18489  | 4%  |
|    | 109A | -> | 122A | -0.33255 | 13% |

|     |      |    |      |          |     |
|-----|------|----|------|----------|-----|
|     | 109A | -> | 123A | 0.15741  | 3%  |
|     | 111A | -> | 122A | 0.19025  | 4%  |
|     | 112A | -> | 122A | 0.10829  | 1%  |
|     | 115A | -> | 125A | -0.23614 | 6%  |
|     | 107B | -> | 123B | 0.20102  | 5%  |
|     | 108B | -> | 121B | 0.14014  | 2%  |
|     | 108B | -> | 122B | -0.29395 | 10% |
|     | 108B | -> | 123B | 0.13124  | 2%  |
|     | 109B | -> | 121B | -0.18489 | 4%  |
|     | 109B | -> | 122B | 0.33255  | 13% |
|     | 109B | -> | 123B | -0.15741 | 3%  |
|     | 111B | -> | 122B | -0.19025 | 4%  |
|     | 112B | -> | 122B | -0.10829 | 1%  |
|     | 115B | -> | 125B | 0.23614  | 6%  |
| 100 | 120A | -> | 128A | 0.53809  | 31% |
|     | 120A | -> | 129A | -0.42189 | 19% |
|     | 120B | -> | 128B | 0.53809  | 31% |
|     | 120B | -> | 129B | -0.42189 | 19% |

---

**Table S30.** TD-DFT calculated transition Kohn-Sham orbital contributions for [Ni(dtbbpy)(*o*-tolyl)Br] S<sub>0</sub>(x).

| Excited State | KS Orbital Transition |      |      | $C_i$    | $C_i^2/\sum C_i^2$ |     |
|---------------|-----------------------|------|------|----------|--------------------|-----|
| 1             | 126A                  | ->   | 133A | 0.16035  | 2%                 |     |
|               | 127A                  | ->   | 133A | -0.51440 | 23%                |     |
|               | 128A                  | ->   | 133A | -0.45497 | 18%                |     |
|               | 129A                  | ->   | 133A | -0.18095 | 3%                 |     |
|               | 126B                  | ->   | 133B | -0.16035 | 2%                 |     |
|               | 127B                  | ->   | 133B | 0.51440  | 23%                |     |
|               | 128B                  | ->   | 133B | 0.45497  | 18%                |     |
|               | 129B                  | ->   | 133B | 0.18095  | 3%                 |     |
|               | 127A                  | <-   | 133A | -0.15122 | 2%                 |     |
|               | 128A                  | <-   | 133A | -0.14123 | 2%                 |     |
|               | 127B                  | <-   | 133B | 0.15122  | 2%                 |     |
|               | 128B                  | <-   | 133B | 0.14123  | 2%                 |     |
|               | 2                     | 123A | ->   | 133A     | -0.33299           | 11% |
|               |                       | 124A | ->   | 133A     | 0.19307            | 4%  |
| 128A          |                       | ->   | 133A | 0.26761  | 7%                 |     |
| 129A          |                       | ->   | 133A | -0.53696 | 28%                |     |
| 123B          |                       | ->   | 133B | 0.33299  | 11%                |     |
| 124B          |                       | ->   | 133B | -0.19307 | 4%                 |     |
| 128B          |                       | ->   | 133B | -0.26761 | 7%                 |     |
| 129B          |                       | ->   | 133B | 0.53696  | 28%                |     |
| 129A          |                       | <-   | 133A | -0.12140 | 1%                 |     |
| 129B          |                       | <-   | 133B | 0.12140  | 1%                 |     |
| 3             |                       | 123A | ->   | 133A     | -0.11205           | 1%  |
|               |                       | 124A | ->   | 133A     | -0.67539           | 44% |
|               |                       | 125A | ->   | 133A     | -0.10896           | 1%  |
|               |                       | 129A | ->   | 133A     | -0.14862           | 2%  |
|               | 123B                  | ->   | 133B | 0.11205  | 1%                 |     |
|               | 124B                  | ->   | 133B | 0.67539  | 44%                |     |
|               | 125B                  | ->   | 133B | 0.10896  | 1%                 |     |
|               | 129B                  | ->   | 133B | 0.14862  | 2%                 |     |
|               | 124A                  | <-   | 133A | -0.14258 | 2%                 |     |
|               | 124B                  | <-   | 133B | 0.14258  | 2%                 |     |
|               | 4                     | 119A | ->   | 133A     | -0.37821           | 15% |
|               |                       | 121A | ->   | 133A     | 0.18695            | 4%  |
|               |                       | 125A | ->   | 133A     | 0.15549            | 3%  |
|               |                       | 126A | ->   | 133A     | -0.50759           | 27% |
| 129A          |                       | ->   | 130A | -0.13778 | 2%                 |     |
| 119B          |                       | ->   | 133B | 0.37821  | 15%                |     |
| 121B          |                       | ->   | 133B | -0.18695 | 4%                 |     |
| 125B          |                       | ->   | 133B | -0.15549 | 3%                 |     |

|   |      |    |      |          |     |
|---|------|----|------|----------|-----|
|   | 126B | -> | 133B | 0.50759  | 27% |
|   | 129B | -> | 130B | 0.13778  | 2%  |
| 5 | 123A | -> | 130A | -0.14402 | 2%  |
|   | 126A | -> | 133A | 0.11105  | 1%  |
|   | 128A | -> | 130A | 0.22448  | 5%  |
|   | 129A | -> | 130A | -0.60628 | 40% |
|   | 129A | -> | 131A | -0.11020 | 1%  |
|   | 123B | -> | 130B | 0.14402  | 2%  |
|   | 126B | -> | 133B | -0.11105 | 1%  |
|   | 128B | -> | 130B | -0.22448 | 5%  |
|   | 129B | -> | 130B | 0.60628  | 40% |
|   | 129B | -> | 131B | 0.11020  | 1%  |
| 6 | 126A | -> | 130A | 0.10742  | 1%  |
|   | 127A | -> | 130A | -0.44432 | 21% |
|   | 128A | -> | 130A | -0.50432 | 26% |
|   | 129A | -> | 130A | -0.12918 | 2%  |
|   | 126B | -> | 130B | -0.10742 | 1%  |
|   | 127B | -> | 130B | 0.44432  | 21% |
|   | 128B | -> | 130B | 0.50432  | 26% |
|   | 129B | -> | 130B | 0.12918  | 2%  |
| 7 | 127A | -> | 130A | 0.44864  | 21% |
|   | 128A | -> | 130A | 0.48032  | 24% |
|   | 129A | -> | 130A | 0.19845  | 4%  |
|   | 127B | -> | 130B | 0.44864  | 21% |
|   | 128B | -> | 130B | 0.48032  | 24% |
|   | 129B | -> | 130B | 0.19845  | 4%  |
| 8 | 124A | -> | 130A | -0.16006 | 3%  |
|   | 126A | -> | 133A | 0.11274  | 1%  |
|   | 127A | -> | 133A | -0.36031 | 13% |
|   | 128A | -> | 130A | -0.20230 | 4%  |
|   | 128A | -> | 133A | -0.29870 | 9%  |
|   | 129A | -> | 130A | 0.40883  | 17% |
|   | 129A | -> | 133A | -0.12890 | 2%  |
|   | 124B | -> | 130B | -0.16006 | 3%  |
|   | 126B | -> | 133B | 0.11274  | 1%  |
|   | 127B | -> | 133B | -0.36031 | 13% |
|   | 128B | -> | 130B | -0.20230 | 4%  |
|   | 128B | -> | 133B | -0.29870 | 9%  |
|   | 129B | -> | 130B | 0.40883  | 17% |
|   | 129B | -> | 133B | -0.12890 | 2%  |
| 9 | 123A | -> | 133A | 0.26815  | 8%  |
|   | 124A | -> | 133A | -0.12519 | 2%  |
|   | 128A | -> | 130A | -0.15049 | 2%  |
|   | 128A | -> | 133A | -0.27678 | 8%  |
|   | 129A | -> | 133A | 0.52344  | 30% |

|    |      |    |      |          |     |
|----|------|----|------|----------|-----|
|    | 123B | -> | 133B | 0.26815  | 8%  |
|    | 124B | -> | 133B | -0.12519 | 2%  |
|    | 128B | -> | 130B | -0.15049 | 2%  |
|    | 128B | -> | 133B | -0.27678 | 8%  |
|    | 129B | -> | 133B | 0.52344  | 30% |
| 10 | 127A | -> | 133A | 0.36462  | 14% |
|    | 128A | -> | 130A | -0.19675 | 4%  |
|    | 128A | -> | 133A | 0.27216  | 8%  |
|    | 129A | -> | 130A | 0.45831  | 22% |
|    | 129A | -> | 133A | 0.14186  | 2%  |
|    | 127B | -> | 133B | 0.36462  | 14% |
|    | 128B | -> | 130B | -0.19675 | 4%  |
|    | 128B | -> | 133B | 0.27216  | 8%  |
|    | 129B | -> | 130B | 0.45831  | 22% |
|    | 129B | -> | 133B | 0.14186  | 2%  |
| 11 | 126A | -> | 130A | -0.12897 | 2%  |
|    | 127A | -> | 130A | 0.50007  | 25% |
|    | 128A | -> | 130A | -0.41344 | 17% |
|    | 129A | -> | 130A | -0.23505 | 6%  |
|    | 126B | -> | 130B | 0.12897  | 2%  |
|    | 127B | -> | 130B | -0.50007 | 25% |
|    | 128B | -> | 130B | 0.41344  | 17% |
|    | 129B | -> | 130B | 0.23505  | 6%  |
| 12 | 124A | -> | 133A | 0.14076  | 2%  |
|    | 126A | -> | 130A | -0.19340 | 4%  |
|    | 127A | -> | 130A | 0.48702  | 24% |
|    | 128A | -> | 130A | -0.38136 | 15% |
|    | 129A | -> | 130A | -0.19366 | 4%  |
|    | 129A | -> | 133A | -0.10368 | 1%  |
|    | 124B | -> | 133B | 0.14076  | 2%  |
|    | 126B | -> | 130B | -0.19340 | 4%  |
|    | 127B | -> | 130B | 0.48702  | 24% |
|    | 128B | -> | 130B | -0.38136 | 15% |
|    | 129B | -> | 130B | -0.19366 | 4%  |
|    | 129B | -> | 133B | -0.10368 | 1%  |
| 13 | 122A | -> | 133A | 0.10465  | 1%  |
|    | 124A | -> | 130A | 0.65487  | 45% |
|    | 124A | -> | 131A | 0.12811  | 2%  |
|    | 125A | -> | 130A | 0.12813  | 2%  |
|    | 122B | -> | 133B | -0.10465 | 1%  |
|    | 124B | -> | 130B | -0.65487 | 45% |
|    | 124B | -> | 131B | -0.12811 | 2%  |
|    | 125B | -> | 130B | -0.12813 | 2%  |
| 14 | 124A | -> | 133A | 0.47722  | 25% |
|    | 126A | -> | 130A | -0.40352 | 18% |

|    |      |    |      |          |     |
|----|------|----|------|----------|-----|
|    | 127A | -> | 130A | -0.17209 | 3%  |
|    | 129A | -> | 133A | 0.17321  | 3%  |
|    | 124B | -> | 133B | 0.47722  | 25% |
|    | 126B | -> | 130B | -0.40352 | 18% |
|    | 127B | -> | 130B | -0.17209 | 3%  |
|    | 129B | -> | 133B | 0.17321  | 3%  |
| 15 | 125A | -> | 130A | -0.11574 | 1%  |
|    | 126A | -> | 130A | 0.66387  | 46% |
|    | 127A | -> | 130A | 0.16614  | 3%  |
|    | 125B | -> | 130B | 0.11574  | 1%  |
|    | 126B | -> | 130B | -0.66387 | 46% |
|    | 127B | -> | 130B | -0.16614 | 3%  |
| 16 | 119A | -> | 133A | 0.34506  | 13% |
|    | 121A | -> | 133A | -0.15651 | 3%  |
|    | 125A | -> | 133A | -0.16752 | 3%  |
|    | 126A | -> | 133A | 0.54050  | 31% |
|    | 119B | -> | 133B | 0.34506  | 13% |
|    | 121B | -> | 133B | -0.15651 | 3%  |
|    | 125B | -> | 133B | -0.16752 | 3%  |
|    | 126B | -> | 133B | 0.54050  | 31% |
| 17 | 124A | -> | 133A | 0.45551  | 22% |
|    | 126A | -> | 130A | 0.50945  | 27% |
|    | 127A | -> | 130A | 0.11312  | 1%  |
|    | 124B | -> | 133B | 0.45551  | 22% |
|    | 126B | -> | 130B | 0.50945  | 27% |
|    | 127B | -> | 130B | 0.11312  | 1%  |
| 18 | 122A | -> | 133A | -0.45945 | 23% |
|    | 124A | -> | 130A | 0.14833  | 2%  |
|    | 127A | -> | 133A | 0.27113  | 8%  |
|    | 128A | -> | 133A | -0.32922 | 12% |
|    | 129A | -> | 133A | -0.17434 | 3%  |
|    | 122B | -> | 133B | 0.45945  | 23% |
|    | 124B | -> | 130B | -0.14833 | 2%  |
|    | 127B | -> | 133B | -0.27113 | 8%  |
|    | 128B | -> | 133B | 0.32922  | 12% |
|    | 129B | -> | 133B | 0.17434  | 3%  |
|    | 122A | <- | 133A | -0.11938 | 2%  |
|    | 122B | <- | 133B | 0.11938  | 2%  |
| 19 | 124A | -> | 130A | 0.63971  | 44% |
|    | 125A | -> | 130A | 0.15316  | 3%  |
|    | 129A | -> | 130A | 0.13526  | 2%  |
|    | 129A | -> | 131A | -0.11253 | 1%  |
|    | 124B | -> | 130B | 0.63971  | 44% |
|    | 125B | -> | 130B | 0.15316  | 3%  |
|    | 129B | -> | 130B | 0.13526  | 2%  |



|      |      |      |          |          |          |     |
|------|------|------|----------|----------|----------|-----|
| 20   | 129B | ->   | 131B     | -0.11253 | 1%       |     |
|      | 123A | ->   | 131A     | -0.10321 | 1%       |     |
|      | 128A | ->   | 131A     | 0.23468  | 6%       |     |
|      | 129A | ->   | 130A     | 0.12870  | 2%       |     |
|      | 129A | ->   | 131A     | -0.61200 | 41%      |     |
|      | 123B | ->   | 131B     | 0.10321  | 1%       |     |
|      | 128B | ->   | 131B     | -0.23468 | 6%       |     |
|      | 129B | ->   | 130B     | -0.12870 | 2%       |     |
| 21   | 129B | ->   | 131B     | 0.61200  | 41%      |     |
|      | 127A | ->   | 131A     | -0.40086 | 17%      |     |
|      | 128A | ->   | 131A     | -0.53426 | 30%      |     |
|      | 129A | ->   | 131A     | -0.17065 | 3%       |     |
|      | 127B | ->   | 131B     | 0.40086  | 17%      |     |
|      | 128B | ->   | 131B     | 0.53426  | 30%      |     |
|      | 129B | ->   | 131B     | 0.17065  | 3%       |     |
|      | 22   | 127A | ->       | 131A     | 0.40255  | 17% |
| 128A |      | ->   | 131A     | 0.51482  | 28%      |     |
| 129A |      | ->   | 131A     | 0.23145  | 6%       |     |
| 127B |      | ->   | 131B     | 0.40255  | 17%      |     |
| 128B |      | ->   | 131B     | 0.51482  | 28%      |     |
| 129B |      | ->   | 131B     | 0.23145  | 6%       |     |
| 23   |      | 124A | ->       | 130A     | 0.11790  | 1%  |
|      |      | 128A | ->       | 131A     | -0.28345 | 8%  |
|      | 129A | ->   | 131A     | 0.61505  | 39%      |     |
|      | 129A | ->   | 132A     | -0.12049 | 1%       |     |
|      | 124B | ->   | 130B     | 0.11790  | 1%       |     |
|      | 128B | ->   | 131B     | -0.28345 | 8%       |     |
|      | 129B | ->   | 131B     | 0.61505  | 39%      |     |
|      | 129B | ->   | 132B     | -0.12049 | 1%       |     |
| 24   | 124A | ->   | 130A     | -0.14884 | 2%       |     |
|      | 125A | ->   | 130A     | 0.66807  | 46%      |     |
|      | 126A | ->   | 130A     | 0.11288  | 1%       |     |
|      | 124B | ->   | 130B     | 0.14884  | 2%       |     |
|      | 125B | ->   | 130B     | -0.66807 | 46%      |     |
|      | 126B | ->   | 130B     | -0.11288 | 1%       |     |
|      | 25   | 124A | ->       | 130A     | -0.16619 | 3%  |
|      |      | 125A | ->       | 130A     | 0.67740  | 47% |
| 124B |      | ->   | 130B     | -0.16619 | 3%       |     |
| 125B |      | ->   | 130B     | 0.67740  | 47%      |     |
| 26   | 127A | ->   | 131A     | -0.55735 | 32%      |     |
|      | 128A | ->   | 131A     | 0.36826  | 14%      |     |
|      | 129A | ->   | 131A     | 0.19214  | 4%       |     |
|      | 127B | ->   | 131B     | 0.55735  | 32%      |     |
|      | 128B | ->   | 131B     | -0.36826 | 14%      |     |
| 129B | ->   | 131B | -0.19214 | 4%       |          |     |

|    |      |    |      |          |     |
|----|------|----|------|----------|-----|
| 27 | 120A | -> | 130A | 0.31034  | 11% |
|    | 120A | -> | 131A | -0.16331 | 3%  |
|    | 123A | -> | 130A | -0.19221 | 4%  |
|    | 125A | -> | 130A | -0.11066 | 1%  |
|    | 128A | -> | 132A | 0.18704  | 4%  |
|    | 129A | -> | 131A | 0.11767  | 2%  |
|    | 129A | -> | 132A | -0.47532 | 25% |
|    | 120B | -> | 130B | -0.31034 | 11% |
|    | 120B | -> | 131B | 0.16331  | 3%  |
|    | 123B | -> | 130B | 0.19221  | 4%  |
|    | 125B | -> | 130B | 0.11066  | 1%  |
|    | 128B | -> | 132B | -0.18704 | 4%  |
|    | 129B | -> | 131B | -0.11767 | 2%  |
|    | 129B | -> | 132B | 0.47532  | 25% |
| 28 | 127A | -> | 131A | 0.56363  | 33% |
|    | 128A | -> | 131A | -0.36923 | 14% |
|    | 129A | -> | 131A | -0.18205 | 3%  |
|    | 127B | -> | 131B | 0.56363  | 33% |
|    | 128B | -> | 131B | -0.36923 | 14% |
|    | 129B | -> | 131B | -0.18205 | 3%  |
| 29 | 127A | -> | 132A | -0.39355 | 16% |
|    | 128A | -> | 132A | -0.53420 | 30% |
|    | 129A | -> | 132A | -0.19649 | 4%  |
|    | 127B | -> | 132B | 0.39355  | 16% |
|    | 128B | -> | 132B | 0.53420  | 30% |
|    | 129B | -> | 132B | 0.19649  | 4%  |
| 30 | 127A | -> | 132A | 0.41035  | 17% |
|    | 128A | -> | 132A | 0.51524  | 27% |
|    | 129A | -> | 132A | 0.22630  | 5%  |
|    | 127B | -> | 132B | 0.41035  | 17% |
|    | 128B | -> | 132B | 0.51524  | 27% |
|    | 129B | -> | 132B | 0.22630  | 5%  |
| 31 | 120A | -> | 130A | 0.45269  | 22% |
|    | 120A | -> | 131A | -0.12437 | 2%  |
|    | 123A | -> | 130A | -0.19506 | 4%  |
|    | 128A | -> | 132A | -0.18773 | 4%  |
|    | 129A | -> | 132A | 0.40841  | 18% |
|    | 120B | -> | 130B | -0.45269 | 22% |
|    | 120B | -> | 131B | 0.12437  | 2%  |
|    | 123B | -> | 130B | 0.19506  | 4%  |
|    | 128B | -> | 132B | 0.18773  | 4%  |
|    | 129B | -> | 132B | -0.40841 | 18% |
| 32 | 126A | -> | 131A | 0.64396  | 44% |
|    | 127A | -> | 132A | 0.23863  | 6%  |
|    | 126B | -> | 131B | -0.64396 | 44% |

|    |  |      |    |      |          |     |
|----|--|------|----|------|----------|-----|
|    |  | 127B | -> | 132B | -0.23863 | 6%  |
| 33 |  | 126A | -> | 131A | -0.34499 | 13% |
|    |  | 128A | -> | 132A | -0.21173 | 5%  |
|    |  | 129A | -> | 132A | 0.54264  | 32% |
|    |  | 126B | -> | 131B | -0.34499 | 13% |
|    |  | 128B | -> | 132B | -0.21173 | 5%  |
|    |  | 129B | -> | 132B | 0.54264  | 32% |
| 34 |  | 126A | -> | 131A | 0.55916  | 33% |
|    |  | 127A | -> | 132A | 0.18534  | 4%  |
|    |  | 128A | -> | 132A | -0.20324 | 4%  |
|    |  | 129A | -> | 132A | 0.29417  | 9%  |
|    |  | 126B | -> | 131B | 0.55916  | 33% |
|    |  | 127B | -> | 132B | 0.18534  | 4%  |
|    |  | 128B | -> | 132B | -0.20324 | 4%  |
|    |  | 129B | -> | 132B | 0.29417  | 9%  |
| 35 |  | 120A | -> | 130A | -0.26692 | 8%  |
|    |  | 123A | -> | 130A | -0.61356 | 42% |
|    |  | 120B | -> | 130B | 0.26692  | 8%  |
|    |  | 123B | -> | 130B | 0.61356  | 42% |
| 36 |  | 124A | -> | 130A | -0.13234 | 2%  |
|    |  | 124A | -> | 131A | 0.65404  | 45% |
|    |  | 125A | -> | 131A | 0.16236  | 3%  |
|    |  | 124B | -> | 130B | 0.13234  | 2%  |
|    |  | 124B | -> | 131B | -0.65404 | 45% |
|    |  | 125B | -> | 131B | -0.16236 | 3%  |
| 37 |  | 123A | -> | 130A | 0.66194  | 47% |
|    |  | 124A | -> | 131A | -0.17942 | 3%  |
|    |  | 123B | -> | 130B | 0.66194  | 47% |
|    |  | 124B | -> | 131B | -0.17942 | 3%  |
| 38 |  | 122A | -> | 130A | -0.12386 | 2%  |
|    |  | 126A | -> | 131A | 0.22348  | 5%  |
|    |  | 126A | -> | 132A | 0.17245  | 3%  |
|    |  | 127A | -> | 132A | -0.48429 | 24% |
|    |  | 128A | -> | 132A | 0.35593  | 13% |
|    |  | 129A | -> | 132A | 0.18485  | 3%  |
|    |  | 122B | -> | 130B | 0.12386  | 2%  |
|    |  | 126B | -> | 131B | -0.22348 | 5%  |
|    |  | 126B | -> | 132B | -0.17245 | 3%  |
|    |  | 127B | -> | 132B | 0.48429  | 24% |
|    |  | 128B | -> | 132B | -0.35593 | 13% |
|    |  | 129B | -> | 132B | -0.18485 | 3%  |
| 39 |  | 123A | -> | 130A | 0.14803  | 2%  |
|    |  | 124A | -> | 131A | 0.58630  | 37% |
|    |  | 125A | -> | 131A | 0.17017  | 3%  |
|    |  | 127A | -> | 132A | -0.20359 | 4%  |

|    |      |    |      |          |     |
|----|------|----|------|----------|-----|
|    | 128A | -> | 132A | 0.13047  | 2%  |
|    | 129A | -> | 132A | 0.11272  | 1%  |
|    | 123B | -> | 130B | 0.14803  | 2%  |
|    | 124B | -> | 131B | 0.58630  | 37% |
|    | 125B | -> | 131B | 0.17017  | 3%  |
|    | 127B | -> | 132B | -0.20359 | 4%  |
|    | 128B | -> | 132B | 0.13047  | 2%  |
|    | 129B | -> | 132B | 0.11272  | 1%  |
| 40 | 124A | -> | 131A | 0.25629  | 7%  |
|    | 126A | -> | 131A | -0.18418 | 4%  |
|    | 126A | -> | 132A | -0.13273 | 2%  |
|    | 127A | -> | 132A | 0.46456  | 23% |
|    | 128A | -> | 132A | -0.34668 | 13% |
|    | 129A | -> | 132A | -0.15588 | 3%  |
|    | 124B | -> | 131B | 0.25629  | 7%  |
|    | 126B | -> | 131B | -0.18418 | 4%  |
|    | 126B | -> | 132B | -0.13273 | 2%  |
|    | 127B | -> | 132B | 0.46456  | 23% |
|    | 128B | -> | 132B | -0.34668 | 13% |
|    | 129B | -> | 132B | -0.15588 | 3%  |
| 41 | 122A | -> | 130A | -0.68123 | 49% |
|    | 127A | -> | 132A | 0.10177  | 1%  |
|    | 122B | -> | 130B | 0.68123  | 49% |
|    | 127B | -> | 132B | -0.10177 | 1%  |
| 42 | 122A | -> | 130A | 0.69622  | 50% |
|    | 122B | -> | 130B | 0.69622  | 50% |
| 43 | 124A | -> | 131A | -0.13835 | 2%  |
|    | 125A | -> | 131A | 0.56059  | 35% |
|    | 125A | -> | 132A | 0.11513  | 1%  |
|    | 125A | -> | 137A | -0.22542 | 6%  |
|    | 126A | -> | 138A | -0.12029 | 2%  |
|    | 127A | -> | 138A | -0.16374 | 3%  |
|    | 128A | -> | 138A | 0.11750  | 2%  |
|    | 124B | -> | 131B | 0.13835  | 2%  |
|    | 125B | -> | 131B | -0.56059 | 35% |
|    | 125B | -> | 132B | -0.11513 | 1%  |
|    | 125B | -> | 137B | 0.22542  | 6%  |
|    | 126B | -> | 138B | 0.12029  | 2%  |
|    | 127B | -> | 138B | 0.16374  | 3%  |
|    | 128B | -> | 138B | -0.11750 | 2%  |
| 44 | 124A | -> | 132A | -0.27562 | 8%  |
|    | 126A | -> | 132A | -0.60095 | 39% |
|    | 127A | -> | 132A | -0.16272 | 3%  |
|    | 124B | -> | 132B | 0.27562  | 8%  |
|    | 126B | -> | 132B | 0.60095  | 39% |

|    |      |    |      |          |     |
|----|------|----|------|----------|-----|
|    | 127B | -> | 132B | 0.16272  | 3%  |
| 45 | 120A | -> | 130A | -0.16047 | 3%  |
|    | 124A | -> | 131A | -0.10079 | 1%  |
|    | 124A | -> | 132A | -0.57785 | 36% |
|    | 125A | -> | 132A | -0.15884 | 3%  |
|    | 126A | -> | 132A | 0.27152  | 8%  |
|    | 120B | -> | 130B | 0.16047  | 3%  |
|    | 124B | -> | 131B | 0.10079  | 1%  |
|    | 124B | -> | 132B | 0.57785  | 36% |
|    | 125B | -> | 132B | 0.15884  | 3%  |
|    | 126B | -> | 132B | -0.27152 | 8%  |
| 46 | 124A | -> | 131A | -0.17712 | 3%  |
|    | 125A | -> | 131A | 0.61556  | 40% |
|    | 126A | -> | 132A | 0.25741  | 7%  |
|    | 124B | -> | 131B | -0.17712 | 3%  |
|    | 125B | -> | 131B | 0.61556  | 40% |
|    | 126B | -> | 132B | 0.25741  | 7%  |
| 47 | 125A | -> | 131A | -0.24314 | 6%  |
|    | 125A | -> | 132A | -0.11358 | 1%  |
|    | 126A | -> | 132A | 0.62302  | 40% |
|    | 127A | -> | 132A | 0.14219  | 2%  |
|    | 125B | -> | 131B | -0.24314 | 6%  |
|    | 125B | -> | 132B | -0.11358 | 1%  |
|    | 126B | -> | 132B | 0.62302  | 40% |
|    | 127B | -> | 132B | 0.14219  | 2%  |
| 48 | 122A | -> | 133A | -0.21107 | 5%  |
|    | 125A | -> | 131A | 0.33795  | 12% |
|    | 125A | -> | 137A | 0.27060  | 8%  |
|    | 126A | -> | 138A | 0.19300  | 4%  |
|    | 127A | -> | 133A | -0.20351 | 4%  |
|    | 127A | -> | 138A | 0.26317  | 7%  |
|    | 128A | -> | 133A | 0.15380  | 3%  |
|    | 128A | -> | 138A | -0.18498 | 4%  |
|    | 129A | -> | 133A | 0.11612  | 1%  |
|    | 129A | -> | 138A | -0.11460 | 1%  |
|    | 122B | -> | 133B | 0.21107  | 5%  |
|    | 125B | -> | 131B | -0.33795 | 12% |
|    | 125B | -> | 137B | -0.27060 | 8%  |
|    | 126B | -> | 138B | -0.19300 | 4%  |
|    | 127B | -> | 133B | 0.20351  | 4%  |
|    | 127B | -> | 138B | -0.26317 | 7%  |
|    | 128B | -> | 133B | -0.15380 | 3%  |
|    | 128B | -> | 138B | 0.18498  | 4%  |
|    | 129B | -> | 133B | -0.11612 | 1%  |
|    | 129B | -> | 138B | 0.11460  | 1%  |

|      |      |      |      |          |          |
|------|------|------|------|----------|----------|
| 49   | 124A | ->   | 132A | 0.27742  | 8%       |
|      | 127A | ->   | 133A | -0.38803 | 16%      |
|      | 128A | ->   | 133A | 0.41699  | 19%      |
|      | 129A | ->   | 133A | 0.24558  | 7%       |
|      | 124B | ->   | 132B | 0.27742  | 8%       |
|      | 127B | ->   | 133B | -0.38803 | 16%      |
|      | 128B | ->   | 133B | 0.41699  | 19%      |
|      | 129B | ->   | 133B | 0.24558  | 7%       |
|      | 50   | 122A | ->   | 133A     | -0.39113 |
| 123A |      | ->   | 133A | -0.13500 | 2%       |
| 125A |      | ->   | 131A | -0.10709 | 1%       |
| 125A |      | ->   | 137A | -0.20814 | 5%       |
| 126A |      | ->   | 138A | -0.11225 | 1%       |
| 127A |      | ->   | 133A | -0.30539 | 10%      |
| 127A |      | ->   | 138A | -0.17609 | 3%       |
| 128A |      | ->   | 133A | 0.21340  | 5%       |
| 128A |      | ->   | 138A | 0.14855  | 2%       |
| 129A |      | ->   | 133A | 0.19347  | 4%       |
| 122B |      | ->   | 133B | 0.39113  | 16%      |
| 123B |      | ->   | 133B | 0.13500  | 2%       |
| 125B |      | ->   | 131B | 0.10709  | 1%       |
| 125B |      | ->   | 137B | 0.20814  | 5%       |
| 126B |      | ->   | 138B | 0.11225  | 1%       |
| 127B |      | ->   | 133B | 0.30539  | 10%      |
| 127B |      | ->   | 138B | 0.17609  | 3%       |
| 128B |      | ->   | 133B | -0.21340 | 5%       |
| 128B |      | ->   | 138B | -0.14855 | 2%       |
| 129B |      | ->   | 133B | -0.19347 | 4%       |
| 51   | 120A | ->   | 130A | -0.10802 | 1%       |
|      | 124A | ->   | 132A | 0.59808  | 40%      |
|      | 125A | ->   | 132A | 0.14032  | 2%       |
|      | 127A | ->   | 133A | 0.18515  | 4%       |
|      | 128A | ->   | 133A | -0.14880 | 2%       |
|      | 120B | ->   | 130B | -0.10802 | 1%       |
|      | 124B | ->   | 132B | 0.59808  | 40%      |
|      | 125B | ->   | 132B | 0.14032  | 2%       |
|      | 127B | ->   | 133B | 0.18515  | 4%       |
|      | 128B | ->   | 133B | -0.14880 | 2%       |
| 52   | 119A | ->   | 130A | 0.19441  | 4%       |
|      | 121A | ->   | 130A | -0.65929 | 46%      |
|      | 119B | ->   | 130B | -0.19441 | 4%       |
|      | 121B | ->   | 130B | 0.65929  | 46%      |
| 53   | 115A | ->   | 132A | -0.10128 | 1%       |
|      | 116A | ->   | 131A | 0.11218  | 1%       |
|      | 116A | ->   | 132A | 0.12418  | 2%       |

|    |      |    |      |          |     |
|----|------|----|------|----------|-----|
|    | 120A | -> | 130A | 0.20227  | 5%  |
|    | 120A | -> | 131A | 0.48245  | 26% |
|    | 123A | -> | 131A | 0.32031  | 11% |
|    | 124A | -> | 132A | -0.13056 | 2%  |
|    | 125A | -> | 132A | 0.14822  | 2%  |
|    | 115B | -> | 132B | 0.10128  | 1%  |
|    | 116B | -> | 131B | -0.11218 | 1%  |
|    | 116B | -> | 132B | -0.12418 | 2%  |
|    | 120B | -> | 130B | -0.20227 | 5%  |
|    | 120B | -> | 131B | -0.48245 | 26% |
|    | 123B | -> | 131B | -0.32031 | 11% |
|    | 124B | -> | 132B | 0.13056  | 2%  |
|    | 125B | -> | 132B | -0.14822 | 2%  |
| 54 | 119A | -> | 130A | -0.20431 | 4%  |
|    | 121A | -> | 130A | 0.66825  | 46% |
|    | 119B | -> | 130B | -0.20431 | 4%  |
|    | 121B | -> | 130B | 0.66825  | 46% |
| 55 | 120A | -> | 131A | -0.20336 | 5%  |
|    | 125A | -> | 132A | 0.63977  | 45% |
|    | 120B | -> | 131B | 0.20336  | 5%  |
|    | 125B | -> | 132B | -0.63977 | 45% |
| 56 | 124A | -> | 132A | -0.15238 | 2%  |
|    | 125A | -> | 131A | -0.10447 | 1%  |
|    | 125A | -> | 132A | 0.66797  | 46% |
|    | 124B | -> | 132B | -0.15238 | 2%  |
|    | 125B | -> | 131B | -0.10447 | 1%  |
|    | 125B | -> | 132B | 0.66797  | 46% |
| 57 | 120A | -> | 131A | 0.28902  | 9%  |
|    | 123A | -> | 131A | -0.57914 | 37% |
|    | 123A | -> | 133A | -0.10268 | 1%  |
|    | 125A | -> | 132A | 0.14037  | 2%  |
|    | 120B | -> | 131B | -0.28902 | 9%  |
|    | 123B | -> | 131B | 0.57914  | 37% |
|    | 123B | -> | 133B | 0.10268  | 1%  |
|    | 125B | -> | 132B | -0.14037 | 2%  |
| 58 | 122A | -> | 133A | 0.13263  | 2%  |
|    | 123A | -> | 131A | 0.11501  | 1%  |
|    | 123A | -> | 133A | -0.54964 | 32% |
|    | 125A | -> | 133A | 0.16934  | 3%  |
|    | 128A | -> | 133A | -0.17550 | 3%  |
|    | 129A | -> | 133A | 0.27281  | 8%  |
|    | 122B | -> | 133B | -0.13263 | 2%  |
|    | 123B | -> | 131B | -0.11501 | 1%  |
|    | 123B | -> | 133B | 0.54964  | 32% |
|    | 125B | -> | 133B | -0.16934 | 3%  |

|    |      |    |      |          |     |
|----|------|----|------|----------|-----|
|    | 128B | -> | 133B | 0.17550  | 3%  |
|    | 129B | -> | 133B | -0.27281 | 8%  |
| 59 | 123A | -> | 131A | 0.67420  | 50% |
|    | 123B | -> | 131B | 0.67420  | 50% |
| 60 | 115A | -> | 130A | -0.28682 | 9%  |
|    | 115A | -> | 131A | 0.13487  | 2%  |
|    | 116A | -> | 130A | -0.11334 | 1%  |
|    | 116A | -> | 131A | -0.24749 | 7%  |
|    | 117A | -> | 132A | 0.11462  | 1%  |
|    | 118A | -> | 132A | -0.18011 | 4%  |
|    | 120A | -> | 132A | -0.25869 | 7%  |
|    | 120A | -> | 134A | -0.21699 | 5%  |
|    | 123A | -> | 131A | 0.12010  | 2%  |
|    | 123A | -> | 132A | -0.25317 | 7%  |
|    | 124A | -> | 132A | -0.13270 | 2%  |
|    | 129A | -> | 134A | 0.15981  | 3%  |
|    | 115B | -> | 130B | 0.28682  | 9%  |
|    | 115B | -> | 131B | -0.13487 | 2%  |
|    | 116B | -> | 130B | 0.11334  | 1%  |
|    | 116B | -> | 131B | 0.24749  | 7%  |
|    | 117B | -> | 132B | -0.11462 | 1%  |
|    | 118B | -> | 132B | 0.18011  | 4%  |
|    | 120B | -> | 132B | 0.25869  | 7%  |
|    | 120B | -> | 134B | 0.21699  | 5%  |
|    | 123B | -> | 131B | -0.12010 | 2%  |
|    | 123B | -> | 132B | 0.25317  | 7%  |
|    | 124B | -> | 132B | 0.13270  | 2%  |
|    | 129B | -> | 134B | -0.15981 | 3%  |
| 61 | 119A | -> | 130A | 0.63045  | 43% |
|    | 121A | -> | 130A | 0.20564  | 5%  |
|    | 122A | -> | 131A | -0.13734 | 2%  |
|    | 119B | -> | 130B | -0.63045 | 43% |
|    | 121B | -> | 130B | -0.20564 | 5%  |
|    | 122B | -> | 131B | 0.13734  | 2%  |
| 62 | 119A | -> | 133A | 0.12122  | 2%  |
|    | 122A | -> | 133A | 0.10385  | 1%  |
|    | 123A | -> | 133A | -0.13468 | 2%  |
|    | 124A | -> | 133A | 0.10527  | 1%  |
|    | 125A | -> | 133A | -0.54450 | 33% |
|    | 126A | -> | 133A | -0.28371 | 9%  |
|    | 127A | -> | 137A | 0.10764  | 1%  |
|    | 119B | -> | 133B | -0.12122 | 2%  |
|    | 122B | -> | 133B | -0.10385 | 1%  |
|    | 123B | -> | 133B | 0.13468  | 2%  |
|    | 124B | -> | 133B | -0.10527 | 1%  |



|    |      |    |      |          |     |
|----|------|----|------|----------|-----|
|    | 125B | -> | 133B | 0.54450  | 33% |
|    | 126B | -> | 133B | 0.28371  | 9%  |
|    | 127B | -> | 137B | -0.10764 | 1%  |
| 63 | 119A | -> | 130A | -0.40675 | 17% |
|    | 121A | -> | 130A | -0.13477 | 2%  |
|    | 122A | -> | 131A | 0.17925  | 3%  |
|    | 123A | -> | 133A | -0.23878 | 6%  |
|    | 125A | -> | 133A | 0.40749  | 18% |
|    | 126A | -> | 133A | 0.13908  | 2%  |
|    | 129A | -> | 133A | 0.12587  | 2%  |
|    | 119B | -> | 130B | -0.40675 | 17% |
|    | 121B | -> | 130B | -0.13477 | 2%  |
|    | 122B | -> | 131B | 0.17925  | 3%  |
|    | 123B | -> | 133B | -0.23878 | 6%  |
|    | 125B | -> | 133B | 0.40749  | 18% |
|    | 126B | -> | 133B | 0.13908  | 2%  |
|    | 129B | -> | 133B | 0.12587  | 2%  |
| 64 | 119A | -> | 130A | 0.43286  | 20% |
|    | 121A | -> | 130A | 0.14218  | 2%  |
|    | 122A | -> | 131A | -0.16050 | 3%  |
|    | 125A | -> | 133A | 0.46080  | 22% |
|    | 126A | -> | 133A | 0.17680  | 3%  |
|    | 119B | -> | 130B | 0.43286  | 20% |
|    | 121B | -> | 130B | 0.14218  | 2%  |
|    | 122B | -> | 131B | -0.16050 | 3%  |
|    | 125B | -> | 133B | 0.46080  | 22% |
|    | 126B | -> | 133B | 0.17680  | 3%  |
| 65 | 119A | -> | 130A | -0.13029 | 2%  |
|    | 122A | -> | 131A | -0.67592 | 48% |
|    | 119B | -> | 130B | 0.13029  | 2%  |
|    | 122B | -> | 131B | 0.67592  | 48% |
| 66 | 119A | -> | 130A | 0.24940  | 6%  |
|    | 122A | -> | 131A | 0.64591  | 44% |
|    | 119B | -> | 130B | 0.24940  | 6%  |
|    | 122B | -> | 131B | 0.64591  | 44% |
| 67 | 117A | -> | 130A | 0.11724  | 2%  |
|    | 118A | -> | 130A | -0.19174 | 5%  |
|    | 120A | -> | 132A | 0.18889  | 4%  |
|    | 123A | -> | 132A | -0.12315 | 2%  |
|    | 125A | -> | 138A | 0.11707  | 2%  |
|    | 126A | -> | 137A | 0.20609  | 5%  |
|    | 127A | -> | 137A | 0.31243  | 12% |
|    | 128A | -> | 137A | -0.24063 | 7%  |
|    | 129A | -> | 134A | 0.25888  | 8%  |
|    | 129A | -> | 137A | -0.14869 | 3%  |

68

|      |    |      |          |     |
|------|----|------|----------|-----|
| 117B | -> | 130B | -0.11724 | 2%  |
| 118B | -> | 130B | 0.19174  | 5%  |
| 120B | -> | 132B | -0.18889 | 4%  |
| 123B | -> | 132B | 0.12315  | 2%  |
| 125B | -> | 138B | -0.11707 | 2%  |
| 126B | -> | 137B | -0.20609 | 5%  |
| 127B | -> | 137B | -0.31243 | 12% |
| 128B | -> | 137B | 0.24063  | 7%  |
| 129B | -> | 134B | -0.25888 | 8%  |
| 129B | -> | 137B | 0.14869  | 3%  |
| 115A | -> | 131A | 0.10004  | 1%  |
| 116A | -> | 132A | 0.10052  | 1%  |
| 117A | -> | 130A | -0.16179 | 3%  |
| 118A | -> | 130A | 0.26446  | 9%  |
| 120A | -> | 132A | -0.24870 | 8%  |
| 123A | -> | 132A | 0.16484  | 3%  |
| 126A | -> | 137A | 0.15769  | 3%  |
| 127A | -> | 137A | 0.24303  | 7%  |
| 128A | -> | 134A | 0.20840  | 5%  |
| 128A | -> | 137A | -0.18860 | 4%  |
| 129A | -> | 134A | -0.16061 | 3%  |
| 129A | -> | 137A | -0.11873 | 2%  |
| 115B | -> | 131B | -0.10004 | 1%  |
| 116B | -> | 132B | -0.10052 | 1%  |
| 117B | -> | 130B | 0.16179  | 3%  |
| 118B | -> | 130B | -0.26446 | 9%  |
| 120B | -> | 132B | 0.24870  | 8%  |
| 123B | -> | 132B | -0.16484 | 3%  |
| 126B | -> | 137B | -0.15769 | 3%  |
| 127B | -> | 137B | -0.24303 | 7%  |
| 128B | -> | 134B | -0.20840 | 5%  |
| 128B | -> | 137B | 0.18860  | 4%  |
| 129B | -> | 134B | 0.16061  | 3%  |
| 129B | -> | 137B | 0.11873  | 2%  |
| 119A | -> | 130A | -0.13793 | 2%  |
| 120A | -> | 130A | -0.17929 | 3%  |
| 123A | -> | 133A | 0.56026  | 34% |
| 125A | -> | 133A | 0.15850  | 3%  |
| 126A | -> | 133A | 0.12129  | 2%  |
| 128A | -> | 133A | 0.13558  | 2%  |
| 129A | -> | 133A | -0.20966 | 5%  |
| 119B | -> | 130B | -0.13793 | 2%  |
| 120B | -> | 130B | -0.17929 | 3%  |
| 123B | -> | 133B | 0.56026  | 34% |
| 125B | -> | 133B | 0.15850  | 3%  |

69

|    |      |    |      |          |     |
|----|------|----|------|----------|-----|
|    | 126B | -> | 133B | 0.12129  | 2%  |
|    | 128B | -> | 133B | 0.13558  | 2%  |
|    | 129B | -> | 133B | -0.20966 | 5%  |
| 70 | 120A | -> | 130A | 0.57085  | 37% |
|    | 120A | -> | 131A | 0.13294  | 2%  |
|    | 123A | -> | 132A | -0.27159 | 8%  |
|    | 123A | -> | 133A | 0.15732  | 3%  |
|    | 120B | -> | 130B | 0.57085  | 37% |
|    | 120B | -> | 131B | 0.13294  | 2%  |
|    | 123B | -> | 132B | -0.27159 | 8%  |
|    | 123B | -> | 133B | 0.15732  | 3%  |
| 71 | 115A | -> | 130A | -0.16631 | 3%  |
|    | 115A | -> | 131A | -0.10857 | 1%  |
|    | 117A | -> | 130A | -0.21360 | 5%  |
|    | 118A | -> | 130A | 0.36905  | 16% |
|    | 120A | -> | 132A | 0.39880  | 18% |
|    | 123A | -> | 132A | -0.22430 | 6%  |
|    | 115B | -> | 130B | 0.16631  | 3%  |
|    | 115B | -> | 131B | 0.10857  | 1%  |
|    | 117B | -> | 130B | 0.21360  | 5%  |
|    | 118B | -> | 130B | -0.36905 | 16% |
|    | 120B | -> | 132B | -0.39880 | 18% |
|    | 123B | -> | 132B | 0.22430  | 6%  |
| 72 | 115A | -> | 130A | 0.19423  | 4%  |
|    | 120A | -> | 134A | 0.10435  | 1%  |
|    | 123A | -> | 132A | -0.48842 | 26% |
|    | 128A | -> | 134A | 0.13755  | 2%  |
|    | 129A | -> | 134A | -0.38088 | 16% |
|    | 115B | -> | 130B | -0.19423 | 4%  |
|    | 120B | -> | 134B | -0.10435 | 1%  |
|    | 123B | -> | 132B | 0.48842  | 26% |
|    | 128B | -> | 134B | -0.13755 | 2%  |
|    | 129B | -> | 134B | 0.38088  | 16% |
| 73 | 127A | -> | 134A | -0.41351 | 18% |
|    | 128A | -> | 134A | -0.50907 | 28% |
|    | 129A | -> | 134A | -0.18748 | 4%  |
|    | 127B | -> | 134B | 0.41351  | 18% |
|    | 128B | -> | 134B | 0.50907  | 28% |
|    | 129B | -> | 134B | 0.18748  | 4%  |
| 74 | 127A | -> | 134A | 0.39677  | 16% |
|    | 128A | -> | 134A | 0.50853  | 26% |
|    | 129A | -> | 134A | 0.26973  | 7%  |
|    | 127B | -> | 134B | 0.39677  | 16% |
|    | 128B | -> | 134B | 0.50853  | 26% |
|    | 129B | -> | 134B | 0.26973  | 7%  |

|      |      |      |          |          |         |     |
|------|------|------|----------|----------|---------|-----|
| 75   | 119A | ->   | 133A     | 0.28880  | 9%      |     |
|      | 121A | ->   | 133A     | -0.44848 | 23%     |     |
|      | 125A | ->   | 133A     | 0.28972  | 9%      |     |
|      | 126A | ->   | 133A     | -0.27845 | 9%      |     |
|      | 119B | ->   | 133B     | -0.28880 | 9%      |     |
|      | 121B | ->   | 133B     | 0.44848  | 23%     |     |
|      | 125B | ->   | 133B     | -0.28972 | 9%      |     |
|      | 126B | ->   | 133B     | 0.27845  | 9%      |     |
|      | 76   | 120A | ->       | 130A     | 0.22983 | 6%  |
|      |      | 123A | ->       | 132A     | 0.62020 | 42% |
| 129A |      | ->   | 134A     | 0.14306  | 2%      |     |
| 120B |      | ->   | 130B     | 0.22983  | 6%      |     |
| 123B |      | ->   | 132B     | 0.62020  | 42%     |     |
| 129B |      | ->   | 134B     | 0.14306  | 2%      |     |
| 77   | 123A | ->   | 132A     | -0.12925 | 2%      |     |
|      | 128A | ->   | 134A     | -0.31340 | 11%     |     |
|      | 129A | ->   | 134A     | 0.59326  | 38%     |     |
|      | 123B | ->   | 132B     | -0.12925 | 2%      |     |
|      | 128B | ->   | 134B     | -0.31340 | 11%     |     |
|      | 129B | ->   | 134B     | 0.59326  | 38%     |     |
| 78   | 115A | ->   | 130A     | -0.20192 | 5%      |     |
|      | 118A | ->   | 130A     | -0.10089 | 1%      |     |
|      | 120A | ->   | 132A     | 0.11972  | 2%      |     |
|      | 123A | ->   | 132A     | 0.12953  | 2%      |     |
|      | 125A | ->   | 134A     | -0.11815 | 2%      |     |
|      | 125A | ->   | 137A     | 0.39848  | 18%     |     |
|      | 126A | ->   | 138A     | -0.14014 | 2%      |     |
|      | 127A | ->   | 138A     | -0.21885 | 5%      |     |
|      | 128A | ->   | 134A     | 0.12860  | 2%      |     |
|      | 128A | ->   | 138A     | 0.19046  | 4%      |     |
|      | 129A | ->   | 134A     | -0.23360 | 6%      |     |
|      | 129A | ->   | 138A     | 0.11391  | 1%      |     |
|      | 115B | ->   | 130B     | 0.20192  | 5%      |     |
|      | 118B | ->   | 130B     | 0.10089  | 1%      |     |
|      | 120B | ->   | 132B     | -0.11972 | 2%      |     |
|      | 123B | ->   | 132B     | -0.12953 | 2%      |     |
|      | 125B | ->   | 134B     | 0.11815  | 2%      |     |
|      | 125B | ->   | 137B     | -0.39848 | 18%     |     |
|      | 126B | ->   | 138B     | 0.14014  | 2%      |     |
|      | 127B | ->   | 138B     | 0.21885  | 5%      |     |
| 128B | ->   | 134B | -0.12860 | 2%       |         |     |
| 128B | ->   | 138B | -0.19046 | 4%       |         |     |
| 129B | ->   | 134B | 0.23360  | 6%       |         |     |
| 129B | ->   | 138B | -0.11391 | 1%       |         |     |
| 79   | 115A | ->   | 130A     | -0.27454 | 9%      |     |

|    |      |    |      |          |     |
|----|------|----|------|----------|-----|
|    | 118A | -> | 130A | -0.13626 | 2%  |
|    | 120A | -> | 132A | 0.18555  | 4%  |
|    | 120A | -> | 134A | -0.11271 | 1%  |
|    | 123A | -> | 132A | 0.15604  | 3%  |
|    | 125A | -> | 137A | -0.30288 | 11% |
|    | 126A | -> | 138A | 0.10691  | 1%  |
|    | 127A | -> | 138A | 0.16171  | 3%  |
|    | 128A | -> | 134A | 0.14586  | 2%  |
|    | 128A | -> | 138A | -0.13616 | 2%  |
|    | 129A | -> | 134A | -0.31661 | 12% |
|    | 115B | -> | 130B | 0.27454  | 9%  |
|    | 118B | -> | 130B | 0.13626  | 2%  |
|    | 120B | -> | 132B | -0.18555 | 4%  |
|    | 120B | -> | 134B | 0.11271  | 1%  |
|    | 123B | -> | 132B | -0.15604 | 3%  |
|    | 125B | -> | 137B | 0.30288  | 11% |
|    | 126B | -> | 138B | -0.10691 | 1%  |
|    | 127B | -> | 138B | -0.16171 | 3%  |
|    | 128B | -> | 134B | -0.14586 | 2%  |
|    | 128B | -> | 138B | 0.13616  | 2%  |
|    | 129B | -> | 134B | 0.31661  | 12% |
| 80 | 116A | -> | 130A | 0.25019  | 7%  |
|    | 122A | -> | 132A | -0.61193 | 43% |
|    | 116B | -> | 130B | -0.25019 | 7%  |
|    | 122B | -> | 132B | 0.61193  | 43% |
| 81 | 115A | -> | 130A | -0.11685 | 2%  |
|    | 116A | -> | 130A | 0.54511  | 33% |
|    | 118A | -> | 132A | 0.11541  | 1%  |
|    | 120A | -> | 134A | -0.10399 | 1%  |
|    | 122A | -> | 132A | 0.28177  | 9%  |
|    | 123A | -> | 132A | -0.19828 | 4%  |
|    | 115B | -> | 130B | 0.11685  | 2%  |
|    | 116B | -> | 130B | -0.54511 | 33% |
|    | 118B | -> | 132B | -0.11541 | 1%  |
|    | 120B | -> | 134B | 0.10399  | 1%  |
|    | 122B | -> | 132B | -0.28177 | 9%  |
|    | 123B | -> | 132B | 0.19828  | 4%  |
| 82 | 122A | -> | 132A | 0.51141  | 27% |
|    | 127A | -> | 134A | 0.37921  | 15% |
|    | 128A | -> | 134A | -0.23622 | 6%  |
|    | 129A | -> | 134A | -0.12604 | 2%  |
|    | 122B | -> | 132B | 0.51141  | 27% |
|    | 127B | -> | 134B | 0.37921  | 15% |
|    | 128B | -> | 134B | -0.23622 | 6%  |
|    | 129B | -> | 134B | -0.12604 | 2%  |

|      |      |      |          |          |          |
|------|------|------|----------|----------|----------|
| 83   | 122A | ->   | 132A     | 0.46976  | 23%      |
|      | 127A | ->   | 134A     | -0.42208 | 18%      |
|      | 128A | ->   | 134A     | 0.25866  | 7%       |
|      | 129A | ->   | 134A     | 0.13634  | 2%       |
|      | 122B | ->   | 132B     | 0.46976  | 23%      |
|      | 127B | ->   | 134B     | -0.42208 | 18%      |
|      | 128B | ->   | 134B     | 0.25866  | 7%       |
|      | 129B | ->   | 134B     | 0.13634  | 2%       |
|      | 84   | 126A | ->       | 134A     | -0.15422 |
| 127A |      | ->   | 134A     | 0.51036  | 28%      |
| 127A |      | ->   | 137A     | 0.12847  | 2%       |
| 128A |      | ->   | 134A     | -0.33584 | 12%      |
| 128A |      | ->   | 137A     | -0.11102 | 1%       |
| 129A |      | ->   | 134A     | -0.17710 | 3%       |
| 126B |      | ->   | 134B     | 0.15422  | 3%       |
| 127B |      | ->   | 134B     | -0.51036 | 28%      |
| 127B |      | ->   | 137B     | -0.12847 | 2%       |
| 128B |      | ->   | 134B     | 0.33584  | 12%      |
| 128B |      | ->   | 137B     | 0.11102  | 1%       |
| 129B |      | ->   | 134B     | 0.17710  | 3%       |
| 85   |      | 128A | ->       | 135A     | -0.12150 |
|      | 129A | ->   | 135A     | 0.68205  | 48%      |
|      | 128B | ->   | 135B     | 0.12150  | 2%       |
|      | 129B | ->   | 135B     | -0.68205 | 48%      |
| 86   | 128A | ->   | 135A     | -0.17526 | 3%       |
|      | 129A | ->   | 135A     | 0.67525  | 47%      |
|      | 128B | ->   | 135B     | -0.17526 | 3%       |
| 87   | 129B | ->   | 135B     | 0.67525  | 47%      |
|      | 127A | ->   | 135A     | 0.29118  | 9%       |
|      | 128A | ->   | 135A     | 0.62317  | 41%      |
| 88   | 127B | ->   | 135B     | -0.29118 | 9%       |
|      | 128B | ->   | 135B     | -0.62317 | 41%      |
|      | 119A | ->   | 133A     | 0.45343  | 22%      |
|      | 121A | ->   | 133A     | -0.28039 | 9%       |
|      | 122A | ->   | 133A     | -0.14073 | 2%       |
|      | 125A | ->   | 133A     | 0.20744  | 5%       |
|      | 126A | ->   | 133A     | -0.31208 | 11%      |
|      | 127A | ->   | 133A     | -0.12537 | 2%       |
|      | 119B | ->   | 133B     | 0.45343  | 22%      |
|      | 121B | ->   | 133B     | -0.28039 | 9%       |
|      | 122B | ->   | 133B     | -0.14073 | 2%       |
|      | 125B | ->   | 133B     | 0.20744  | 5%       |
|      | 126B | ->   | 133B     | -0.31208 | 11%      |
| 127B | ->   | 133B | -0.12537 | 2%       |          |
| 89   | 119A | ->   | 131A     | 0.11373  | 1%       |

|    |      |    |      |          |     |
|----|------|----|------|----------|-----|
|    | 121A | -> | 131A | -0.68385 | 49% |
|    | 119B | -> | 131B | -0.11373 | 1%  |
|    | 121B | -> | 131B | 0.68385  | 49% |
| 90 | 127A | -> | 135A | 0.28112  | 8%  |
|    | 128A | -> | 135A | 0.62720  | 40% |
|    | 129A | -> | 135A | 0.13637  | 2%  |
|    | 127B | -> | 135B | 0.28112  | 8%  |
|    | 128B | -> | 135B | 0.62720  | 40% |
|    | 129B | -> | 135B | 0.13637  | 2%  |
| 91 | 119A | -> | 131A | -0.11978 | 1%  |
|    | 121A | -> | 131A | 0.68129  | 49% |
|    | 119B | -> | 131B | -0.11978 | 1%  |
|    | 121B | -> | 131B | 0.68129  | 49% |
| 92 | 119A | -> | 133A | -0.42394 | 20% |
|    | 121A | -> | 133A | -0.43959 | 21% |
|    | 125A | -> | 133A | -0.10221 | 1%  |
|    | 126A | -> | 133A | 0.13793  | 2%  |
|    | 127A | -> | 135A | 0.11451  | 1%  |
|    | 127A | -> | 138A | -0.13547 | 2%  |
|    | 128A | -> | 138A | -0.12872 | 2%  |
|    | 119B | -> | 133B | 0.42394  | 20% |
|    | 121B | -> | 133B | 0.43959  | 21% |
|    | 125B | -> | 133B | 0.10221  | 1%  |
|    | 126B | -> | 133B | -0.13793 | 2%  |
|    | 127B | -> | 135B | -0.11451 | 1%  |
|    | 127B | -> | 138B | 0.13547  | 2%  |
|    | 128B | -> | 138B | 0.12872  | 2%  |
| 93 | 126A | -> | 134A | 0.68540  | 50% |
|    | 126B | -> | 134B | 0.68540  | 50% |
| 94 | 125A | -> | 138A | 0.12249  | 2%  |
|    | 126A | -> | 134A | 0.65043  | 47% |
|    | 127A | -> | 134A | 0.12776  | 2%  |
|    | 125B | -> | 138B | -0.12249 | 2%  |
|    | 126B | -> | 134B | -0.65043 | 47% |
|    | 127B | -> | 134B | -0.12776 | 2%  |
| 95 | 127A | -> | 135A | 0.60436  | 39% |
|    | 128A | -> | 135A | -0.28689 | 9%  |
|    | 129A | -> | 135A | -0.14141 | 2%  |
|    | 127B | -> | 135B | -0.60436 | 39% |
|    | 128B | -> | 135B | 0.28689  | 9%  |
|    | 129B | -> | 135B | 0.14141  | 2%  |
| 96 | 127A | -> | 135A | 0.63570  | 41% |
|    | 128A | -> | 135A | -0.26178 | 7%  |
|    | 129A | -> | 135A | -0.12955 | 2%  |
|    | 127B | -> | 135B | 0.63570  | 41% |

|     |      |    |      |          |     |
|-----|------|----|------|----------|-----|
|     | 128B | -> | 135B | -0.26178 | 7%  |
|     | 129B | -> | 135B | -0.12955 | 2%  |
| 97  | 117A | -> | 130A | -0.13181 | 2%  |
|     | 118A | -> | 130A | 0.24640  | 7%  |
|     | 120A | -> | 130A | -0.18950 | 4%  |
|     | 120A | -> | 131A | 0.56735  | 35% |
|     | 124A | -> | 134A | -0.17219 | 3%  |
|     | 117B | -> | 130B | -0.13181 | 2%  |
|     | 118B | -> | 130B | 0.24640  | 7%  |
|     | 120B | -> | 130B | -0.18950 | 4%  |
|     | 120B | -> | 131B | 0.56735  | 35% |
|     | 124B | -> | 134B | -0.17219 | 3%  |
| 98  | 125A | -> | 138A | 0.53840  | 32% |
|     | 126A | -> | 134A | -0.10376 | 1%  |
|     | 126A | -> | 138A | 0.14149  | 2%  |
|     | 127A | -> | 137A | -0.15824 | 3%  |
|     | 127A | -> | 138A | 0.16784  | 3%  |
|     | 128A | -> | 138A | 0.25147  | 7%  |
|     | 129A | -> | 138A | 0.11490  | 1%  |
|     | 125B | -> | 138B | -0.53840 | 32% |
|     | 126B | -> | 134B | 0.10376  | 1%  |
|     | 126B | -> | 138B | -0.14149 | 2%  |
|     | 127B | -> | 137B | 0.15824  | 3%  |
|     | 127B | -> | 138B | -0.16784 | 3%  |
|     | 128B | -> | 138B | -0.25147 | 7%  |
|     | 129B | -> | 138B | -0.11490 | 1%  |
| 99  | 117A | -> | 131A | -0.10315 | 1%  |
|     | 118A | -> | 131A | 0.18038  | 4%  |
|     | 118A | -> | 132A | -0.12940 | 2%  |
|     | 124A | -> | 134A | 0.61470  | 41% |
|     | 125A | -> | 134A | 0.13612  | 2%  |
|     | 117B | -> | 131B | 0.10315  | 1%  |
|     | 118B | -> | 131B | -0.18038 | 4%  |
|     | 118B | -> | 132B | 0.12940  | 2%  |
|     | 124B | -> | 134B | -0.61470 | 41% |
|     | 125B | -> | 134B | -0.13612 | 2%  |
| 100 | 119A | -> | 133A | 0.13979  | 2%  |
|     | 121A | -> | 133A | 0.11194  | 1%  |
|     | 125A | -> | 138A | 0.29231  | 9%  |
|     | 127A | -> | 137A | 0.16775  | 3%  |
|     | 127A | -> | 138A | -0.32307 | 11% |
|     | 128A | -> | 137A | 0.28715  | 9%  |
|     | 128A | -> | 138A | -0.33178 | 12% |
|     | 129A | -> | 137A | 0.11017  | 1%  |
|     | 129A | -> | 138A | -0.10786 | 1%  |



|      |    |      |          |     |
|------|----|------|----------|-----|
| 119B | -> | 133B | -0.13979 | 2%  |
| 121B | -> | 133B | -0.11194 | 1%  |
| 125B | -> | 138B | -0.29231 | 9%  |
| 127B | -> | 137B | -0.16775 | 3%  |
| 127B | -> | 138B | 0.32307  | 11% |
| 128B | -> | 137B | -0.28715 | 9%  |
| 128B | -> | 138B | 0.33178  | 12% |
| 129B | -> | 137B | -0.11017 | 1%  |
| 129B | -> | 138B | 0.10786  | 1%  |

---

**Table S31.** TD-DFT calculated transition Kohn-Sham orbital contributions for [Ni(dtbbpy)(*o*-tolyl)I] S<sub>0</sub>(**x**).

| Excited State | KS Orbital Transition |      |          | $C_i$    | $C_i^2/\sum C_i^2$ |
|---------------|-----------------------|------|----------|----------|--------------------|
| 1             | 107A                  | ->   | 119A     | -0.10341 | 1%                 |
|               | 112A                  | ->   | 119A     | -0.14658 | 2%                 |
|               | 113A                  | ->   | 119A     | 0.69818  | 41%                |
|               | 115A                  | ->   | 119A     | -0.16112 | 2%                 |
|               | 107B                  | ->   | 119B     | 0.10341  | 1%                 |
|               | 112B                  | ->   | 119B     | 0.14658  | 2%                 |
|               | 113B                  | ->   | 119B     | -0.69818 | 41%                |
|               | 115B                  | ->   | 119B     | 0.16112  | 2%                 |
|               | 113A                  | <-   | 119A     | 0.22356  | 4%                 |
|               | 113B                  | <-   | 119B     | -0.22356 | 4%                 |
|               | 2                     | 109A | ->       | 119A     | 0.44080            |
| 110A          |                       | ->   | 119A     | -0.16829 | 3%                 |
| 111A          |                       | ->   | 119A     | 0.15679  | 2%                 |
| 114A          |                       | ->   | 119A     | 0.50428  | 23%                |
| 115A          |                       | ->   | 119A     | -0.12033 | 1%                 |
| 109B          |                       | ->   | 119B     | -0.44080 | 18%                |
| 110B          |                       | ->   | 119B     | 0.16829  | 3%                 |
| 111B          |                       | ->   | 119B     | -0.15679 | 2%                 |
| 114B          |                       | ->   | 119B     | -0.50428 | 23%                |
| 115B          |                       | ->   | 119B     | 0.12033  | 1%                 |
| 109A          |                       | <-   | 119A     | 0.11684  | 1%                 |
| 114A          |                       | <-   | 119A     | 0.11657  | 1%                 |
| 109B          |                       | <-   | 119B     | -0.11684 | 1%                 |
| 114B          |                       | <-   | 119B     | -0.11657 | 1%                 |
| 3             |                       | 109A | ->       | 119A     | 0.16098            |
|               | 110A                  | ->   | 119A     | 0.64277  | 39%                |
|               | 111A                  | ->   | 119A     | -0.22182 | 5%                 |
|               | 114A                  | ->   | 119A     | 0.13065  | 2%                 |
|               | 109B                  | ->   | 119B     | -0.16098 | 2%                 |
|               | 110B                  | ->   | 119B     | -0.64277 | 39%                |
|               | 111B                  | ->   | 119B     | 0.22182  | 5%                 |
|               | 114B                  | ->   | 119B     | -0.13065 | 2%                 |
|               | 110A                  | <-   | 119A     | 0.14078  | 2%                 |
| 110B          | <-                    | 119B | -0.14078 | 2%       |                    |
| 4             | 105A                  | ->   | 119A     | 0.42660  | 19%                |
|               | 107A                  | ->   | 119A     | -0.14446 | 2%                 |
|               | 108A                  | ->   | 119A     | -0.14840 | 2%                 |
|               | 111A                  | ->   | 119A     | 0.10779  | 1%                 |
|               | 112A                  | ->   | 119A     | 0.48012  | 24%                |
|               | 115A                  | ->   | 119A     | -0.12159 | 2%                 |

|    |      |    |      |          |     |
|----|------|----|------|----------|-----|
|    | 105B | -> | 119B | -0.42660 | 19% |
|    | 107B | -> | 119B | 0.14446  | 2%  |
|    | 108B | -> | 119B | 0.14840  | 2%  |
|    | 111B | -> | 119B | -0.10779 | 1%  |
|    | 112B | -> | 119B | -0.48012 | 24% |
|    | 115B | -> | 119B | 0.12159  | 2%  |
| 5  | 109A | -> | 116A | 0.20473  | 5%  |
|    | 114A | -> | 116A | 0.61031  | 40% |
|    | 115A | -> | 116A | -0.21667 | 5%  |
|    | 109B | -> | 116B | -0.20473 | 5%  |
|    | 114B | -> | 116B | -0.61031 | 40% |
|    | 115B | -> | 116B | 0.21667  | 5%  |
| 6  | 112A | -> | 116A | 0.10506  | 1%  |
|    | 113A | -> | 116A | -0.61697 | 39% |
|    | 113A | -> | 117A | -0.10992 | 1%  |
|    | 114A | -> | 116A | 0.14299  | 2%  |
|    | 115A | -> | 116A | 0.26195  | 7%  |
|    | 112B | -> | 116B | -0.10506 | 1%  |
|    | 113B | -> | 116B | 0.61697  | 39% |
|    | 113B | -> | 117B | 0.10992  | 1%  |
|    | 114B | -> | 116B | -0.14299 | 2%  |
|    | 115B | -> | 116B | -0.26195 | 7%  |
| 7  | 113A | -> | 116A | 0.59664  | 38% |
|    | 115A | -> | 116A | -0.33327 | 12% |
|    | 113B | -> | 116B | 0.59664  | 38% |
|    | 115B | -> | 116B | -0.33327 | 12% |
| 8  | 110A | -> | 116A | 0.12333  | 2%  |
|    | 112A | -> | 119A | -0.10137 | 1%  |
|    | 113A | -> | 119A | 0.51795  | 28% |
|    | 114A | -> | 116A | -0.40032 | 17% |
|    | 115A | -> | 116A | 0.10651  | 1%  |
|    | 115A | -> | 119A | -0.10020 | 1%  |
|    | 110B | -> | 116B | 0.12333  | 2%  |
|    | 112B | -> | 119B | -0.10137 | 1%  |
|    | 113B | -> | 119B | 0.51795  | 28% |
|    | 114B | -> | 116B | -0.40032 | 17% |
|    | 115B | -> | 116B | 0.10651  | 1%  |
|    | 115B | -> | 119B | -0.10020 | 1%  |
| 9  | 113A | -> | 116A | 0.28220  | 8%  |
|    | 114A | -> | 116A | 0.18369  | 3%  |
|    | 115A | -> | 116A | 0.61073  | 38% |
|    | 113B | -> | 116B | -0.28220 | 8%  |
|    | 114B | -> | 116B | -0.18369 | 3%  |
|    | 115B | -> | 116B | -0.61073 | 38% |
| 10 | 109A | -> | 119A | 0.20518  | 4%  |

|    |      |    |      |          |     |
|----|------|----|------|----------|-----|
|    | 113A | -> | 116A | 0.25266  | 7%  |
|    | 114A | -> | 116A | 0.12922  | 2%  |
|    | 114A | -> | 119A | 0.27714  | 8%  |
|    | 115A | -> | 116A | 0.53631  | 30% |
|    | 109B | -> | 119B | 0.20518  | 4%  |
|    | 113B | -> | 116B | 0.25266  | 7%  |
|    | 114B | -> | 116B | 0.12922  | 2%  |
|    | 114B | -> | 119B | 0.27714  | 8%  |
|    | 115B | -> | 116B | 0.53631  | 30% |
| 11 | 109A | -> | 119A | 0.30577  | 10% |
|    | 110A | -> | 119A | -0.13087 | 2%  |
|    | 111A | -> | 119A | 0.12211  | 2%  |
|    | 112A | -> | 116A | 0.16022  | 3%  |
|    | 113A | -> | 116A | -0.22064 | 5%  |
|    | 113A | -> | 119A | 0.10194  | 1%  |
|    | 114A | -> | 119A | 0.43210  | 19% |
|    | 115A | -> | 116A | -0.27648 | 8%  |
|    | 115A | -> | 119A | -0.13048 | 2%  |
|    | 109B | -> | 119B | 0.30577  | 10% |
|    | 110B | -> | 119B | -0.13087 | 2%  |
|    | 111B | -> | 119B | 0.12211  | 2%  |
|    | 112B | -> | 116B | 0.16022  | 3%  |
|    | 113B | -> | 116B | -0.22064 | 5%  |
|    | 113B | -> | 119B | 0.10194  | 1%  |
|    | 114B | -> | 119B | 0.43210  | 19% |
|    | 115B | -> | 116B | -0.27648 | 8%  |
|    | 115B | -> | 119B | -0.13048 | 2%  |
| 12 | 113A | -> | 119A | 0.41032  | 18% |
|    | 114A | -> | 116A | 0.53330  | 31% |
|    | 114A | -> | 119A | -0.11497 | 1%  |
|    | 113B | -> | 119B | 0.41032  | 18% |
|    | 114B | -> | 116B | 0.53330  | 31% |
|    | 114B | -> | 119B | -0.11497 | 1%  |
| 13 | 107A | -> | 119A | -0.19338 | 4%  |
|    | 108A | -> | 119A | 0.40061  | 17% |
|    | 110A | -> | 116A | -0.20499 | 4%  |
|    | 113A | -> | 119A | 0.10911  | 1%  |
|    | 114A | -> | 116A | 0.11883  | 1%  |
|    | 114A | -> | 119A | 0.12035  | 1%  |
|    | 115A | -> | 119A | 0.43322  | 19% |
|    | 107B | -> | 119B | 0.19338  | 4%  |
|    | 108B | -> | 119B | -0.40061 | 17% |
|    | 110B | -> | 116B | 0.20499  | 4%  |
|    | 113B | -> | 119B | -0.10911 | 1%  |
|    | 114B | -> | 116B | -0.11883 | 1%  |

|    |      |    |      |          |     |
|----|------|----|------|----------|-----|
|    | 114B | -> | 119B | -0.12035 | 1%  |
|    | 115B | -> | 119B | -0.43322 | 19% |
|    | 108A | <- | 119A | 0.12760  | 2%  |
|    | 108B | <- | 119B | -0.12760 | 2%  |
| 14 | 109A | -> | 119A | 0.14172  | 2%  |
|    | 110A | -> | 119A | 0.57395  | 35% |
|    | 111A | -> | 119A | -0.20564 | 4%  |
|    | 112A | -> | 116A | -0.23745 | 6%  |
|    | 114A | -> | 119A | 0.15406  | 3%  |
|    | 109B | -> | 119B | 0.14172  | 2%  |
|    | 110B | -> | 119B | 0.57395  | 35% |
|    | 111B | -> | 119B | -0.20564 | 4%  |
|    | 112B | -> | 116B | -0.23745 | 6%  |
|    | 114B | -> | 119B | 0.15406  | 3%  |
| 15 | 108A | -> | 119A | -0.12488 | 2%  |
|    | 110A | -> | 116A | -0.56422 | 33% |
|    | 110A | -> | 117A | -0.10333 | 1%  |
|    | 111A | -> | 116A | 0.27194  | 8%  |
|    | 112A | -> | 116A | 0.18602  | 4%  |
|    | 115A | -> | 119A | -0.15186 | 2%  |
|    | 108B | -> | 119B | 0.12488  | 2%  |
|    | 110B | -> | 116B | 0.56422  | 33% |
|    | 110B | -> | 117B | 0.10333  | 1%  |
|    | 111B | -> | 116B | -0.27194 | 8%  |
|    | 112B | -> | 116B | -0.18602 | 4%  |
|    | 115B | -> | 119B | 0.15186  | 2%  |
| 16 | 110A | -> | 116A | 0.18981  | 4%  |
|    | 112A | -> | 116A | 0.65128  | 45% |
|    | 113A | -> | 116A | 0.12688  | 2%  |
|    | 110B | -> | 116B | -0.18981 | 4%  |
|    | 112B | -> | 116B | -0.65128 | 45% |
|    | 113B | -> | 116B | -0.12688 | 2%  |
| 17 | 105A | -> | 119A | 0.38010  | 16% |
|    | 107A | -> | 119A | -0.13984 | 2%  |
|    | 108A | -> | 119A | -0.10787 | 1%  |
|    | 112A | -> | 119A | 0.52529  | 31% |
|    | 105B | -> | 119B | 0.38010  | 16% |
|    | 107B | -> | 119B | -0.13984 | 2%  |
|    | 108B | -> | 119B | -0.10787 | 1%  |
|    | 112B | -> | 119B | 0.52529  | 31% |
| 18 | 110A | -> | 119A | 0.24963  | 6%  |
|    | 111A | -> | 119A | -0.11170 | 1%  |
|    | 112A | -> | 116A | 0.62543  | 40% |
|    | 113A | -> | 116A | 0.13570  | 2%  |
|    | 110B | -> | 119B | 0.24963  | 6%  |

|    |      |    |      |          |     |
|----|------|----|------|----------|-----|
|    | 111B | -> | 119B | -0.11170 | 1%  |
|    | 112B | -> | 116B | 0.62543  | 40% |
|    | 113B | -> | 116B | 0.13570  | 2%  |
| 19 | 110A | -> | 116A | 0.58606  | 37% |
|    | 111A | -> | 116A | -0.30185 | 10% |
|    | 114A | -> | 116A | 0.12644  | 2%  |
|    | 114A | -> | 117A | -0.12045 | 2%  |
|    | 110B | -> | 116B | 0.58606  | 37% |
|    | 111B | -> | 116B | -0.30185 | 10% |
|    | 114B | -> | 116B | 0.12644  | 2%  |
|    | 114B | -> | 117B | -0.12045 | 2%  |
| 20 | 109A | -> | 116A | 0.22651  | 5%  |
|    | 109A | -> | 117A | 0.14826  | 2%  |
|    | 114A | -> | 116A | -0.17465 | 3%  |
|    | 114A | -> | 117A | 0.55803  | 33% |
|    | 115A | -> | 117A | -0.23122 | 6%  |
|    | 109B | -> | 116B | -0.22651 | 5%  |
|    | 109B | -> | 117B | -0.14826 | 2%  |
|    | 114B | -> | 116B | 0.17465  | 3%  |
|    | 114B | -> | 117B | -0.55803 | 33% |
|    | 115B | -> | 117B | 0.23122  | 6%  |
| 21 | 113A | -> | 117A | -0.34764 | 13% |
|    | 114A | -> | 117A | 0.20587  | 4%  |
|    | 115A | -> | 117A | 0.56147  | 33% |
|    | 113B | -> | 117B | 0.34764  | 13% |
|    | 114B | -> | 117B | -0.20587 | 4%  |
|    | 115B | -> | 117B | -0.56147 | 33% |
| 22 | 113A | -> | 117A | -0.29917 | 9%  |
|    | 115A | -> | 117A | 0.62436  | 41% |
|    | 113B | -> | 117B | -0.29917 | 9%  |
|    | 115B | -> | 117B | 0.62436  | 41% |
| 23 | 113A | -> | 117A | -0.13693 | 2%  |
|    | 114A | -> | 117A | 0.66603  | 47% |
|    | 114A | -> | 118A | -0.11571 | 1%  |
|    | 113B | -> | 117B | -0.13693 | 2%  |
|    | 114B | -> | 117B | 0.66603  | 47% |
|    | 114B | -> | 118B | -0.11571 | 1%  |
| 24 | 106A | -> | 116A | 0.13038  | 2%  |
|    | 109A | -> | 116A | -0.47734 | 24% |
|    | 110A | -> | 116A | -0.13831 | 2%  |
|    | 111A | -> | 116A | -0.26198 | 7%  |
|    | 114A | -> | 116A | 0.13377  | 2%  |
|    | 114A | -> | 117A | 0.29634  | 9%  |
|    | 114A | -> | 118A | -0.16909 | 3%  |
|    | 106B | -> | 116B | -0.13038 | 2%  |

|    |      |    |      |          |     |
|----|------|----|------|----------|-----|
|    | 109B | -> | 116B | 0.47734  | 24% |
|    | 110B | -> | 116B | 0.13831  | 2%  |
|    | 111B | -> | 116B | 0.26198  | 7%  |
|    | 114B | -> | 116B | -0.13377 | 2%  |
|    | 114B | -> | 117B | -0.29634 | 9%  |
|    | 114B | -> | 118B | 0.16909  | 3%  |
| 25 | 113A | -> | 117A | -0.58533 | 36% |
|    | 114A | -> | 117A | -0.13547 | 2%  |
|    | 115A | -> | 117A | -0.33099 | 12% |
|    | 113B | -> | 117B | 0.58533  | 36% |
|    | 114B | -> | 117B | 0.13547  | 2%  |
|    | 115B | -> | 117B | 0.33099  | 12% |
| 26 | 113A | -> | 117A | 0.60664  | 38% |
|    | 114A | -> | 117A | 0.11479  | 1%  |
|    | 115A | -> | 117A | 0.31152  | 10% |
|    | 113B | -> | 117B | 0.60664  | 38% |
|    | 114B | -> | 117B | 0.11479  | 1%  |
|    | 115B | -> | 117B | 0.31152  | 10% |
| 27 | 109A | -> | 116A | 0.17838  | 3%  |
|    | 110A | -> | 116A | 0.33363  | 11% |
|    | 111A | -> | 116A | 0.58674  | 35% |
|    | 109B | -> | 116B | 0.17838  | 3%  |
|    | 110B | -> | 116B | 0.33363  | 11% |
|    | 111B | -> | 116B | 0.58674  | 35% |
| 28 | 109A | -> | 116A | 0.25116  | 7%  |
|    | 110A | -> | 116A | -0.23607 | 6%  |
|    | 111A | -> | 116A | -0.57442 | 35% |
|    | 114A | -> | 118A | 0.15122  | 2%  |
|    | 109B | -> | 116B | -0.25116 | 7%  |
|    | 110B | -> | 116B | 0.23607  | 6%  |
|    | 111B | -> | 116B | 0.57442  | 35% |
|    | 114B | -> | 118B | -0.15122 | 2%  |
| 29 | 109A | -> | 116A | 0.64891  | 45% |
|    | 111A | -> | 116A | -0.20753 | 5%  |
|    | 109B | -> | 116B | 0.64891  | 45% |
|    | 111B | -> | 116B | -0.20753 | 5%  |
| 30 | 106A | -> | 116A | -0.13758 | 2%  |
|    | 106A | -> | 117A | 0.10017  | 1%  |
|    | 109A | -> | 116A | -0.30191 | 10% |
|    | 109A | -> | 118A | 0.11588  | 1%  |
|    | 114A | -> | 118A | 0.52703  | 29% |
|    | 115A | -> | 118A | -0.25335 | 7%  |
|    | 106B | -> | 116B | 0.13758  | 2%  |
|    | 106B | -> | 117B | -0.10017 | 1%  |
|    | 109B | -> | 116B | 0.30191  | 10% |

|    |      |    |      |          |     |
|----|------|----|------|----------|-----|
|    | 109B | -> | 118B | -0.11588 | 1%  |
|    | 114B | -> | 118B | -0.52703 | 29% |
|    | 115B | -> | 118B | 0.25335  | 7%  |
| 31 | 112A | -> | 117A | 0.23004  | 6%  |
|    | 113A | -> | 118A | -0.33703 | 12% |
|    | 114A | -> | 118A | 0.24766  | 6%  |
|    | 115A | -> | 118A | 0.49734  | 26% |
|    | 112B | -> | 117B | -0.23004 | 6%  |
|    | 113B | -> | 118B | 0.33703  | 12% |
|    | 114B | -> | 118B | -0.24766 | 6%  |
|    | 115B | -> | 118B | -0.49734 | 26% |
| 32 | 112A | -> | 117A | 0.20316  | 4%  |
|    | 113A | -> | 118A | -0.33607 | 12% |
|    | 115A | -> | 118A | 0.57354  | 34% |
|    | 112B | -> | 117B | 0.20316  | 4%  |
|    | 113B | -> | 118B | -0.33607 | 12% |
|    | 115B | -> | 118B | 0.57354  | 34% |
| 33 | 113A | -> | 118A | -0.11162 | 1%  |
|    | 114A | -> | 117A | 0.10235  | 1%  |
|    | 114A | -> | 118A | 0.65967  | 47% |
|    | 113B | -> | 118B | -0.11162 | 1%  |
|    | 114B | -> | 117B | 0.10235  | 1%  |
|    | 114B | -> | 118B | 0.65967  | 47% |
| 34 | 112A | -> | 117A | -0.43651 | 20% |
|    | 113A | -> | 118A | -0.52669 | 29% |
|    | 115A | -> | 118A | -0.12585 | 2%  |
|    | 112B | -> | 117B | 0.43651  | 20% |
|    | 113B | -> | 118B | 0.52669  | 29% |
|    | 115B | -> | 118B | 0.12585  | 2%  |
| 35 | 112A | -> | 117A | 0.45339  | 21% |
|    | 113A | -> | 118A | 0.51069  | 27% |
|    | 115A | -> | 118A | 0.13027  | 2%  |
|    | 112B | -> | 117B | 0.45339  | 21% |
|    | 113B | -> | 118B | 0.51069  | 27% |
|    | 115B | -> | 118B | 0.13027  | 2%  |
| 36 | 101A | -> | 120A | -0.10896 | 1%  |
|    | 106A | -> | 116A | -0.58251 | 38% |
|    | 106A | -> | 117A | 0.19402  | 4%  |
|    | 114A | -> | 118A | -0.23329 | 6%  |
|    | 101B | -> | 120B | 0.10896  | 1%  |
|    | 106B | -> | 116B | 0.58251  | 38% |
|    | 106B | -> | 117B | -0.19402 | 4%  |
|    | 114B | -> | 118B | 0.23329  | 6%  |
| 37 | 112A | -> | 117A | 0.47293  | 23% |
|    | 112A | -> | 118A | 0.12081  | 2%  |



|    |      |    |      |          |     |
|----|------|----|------|----------|-----|
|    | 113A | -> | 118A | -0.29562 | 9%  |
|    | 114A | -> | 118A | -0.12616 | 2%  |
|    | 115A | -> | 118A | -0.37712 | 15% |
|    | 112B | -> | 117B | -0.47293 | 23% |
|    | 112B | -> | 118B | -0.12081 | 2%  |
|    | 113B | -> | 118B | 0.29562  | 9%  |
|    | 114B | -> | 118B | 0.12616  | 2%  |
|    | 115B | -> | 118B | 0.37712  | 15% |
| 38 | 112A | -> | 117A | 0.47561  | 23% |
|    | 112A | -> | 118A | 0.10763  | 1%  |
|    | 113A | -> | 118A | -0.31255 | 10% |
|    | 114A | -> | 118A | -0.13628 | 2%  |
|    | 115A | -> | 118A | -0.36496 | 14% |
|    | 112B | -> | 117B | 0.47561  | 23% |
|    | 112B | -> | 118B | 0.10763  | 1%  |
|    | 113B | -> | 118B | -0.31255 | 10% |
|    | 114B | -> | 118B | -0.13628 | 2%  |
|    | 115B | -> | 118B | -0.36496 | 14% |
| 39 | 110A | -> | 116A | -0.12911 | 2%  |
|    | 110A | -> | 117A | 0.60663  | 39% |
|    | 111A | -> | 117A | -0.29769 | 9%  |
|    | 110B | -> | 116B | 0.12911  | 2%  |
|    | 110B | -> | 117B | -0.60663 | 39% |
|    | 111B | -> | 117B | 0.29769  | 9%  |
| 40 | 108A | -> | 116A | 0.67861  | 50% |
|    | 108B | -> | 116B | -0.67861 | 50% |
| 41 | 108A | -> | 119A | -0.10009 | 1%  |
|    | 110A | -> | 117A | 0.26377  | 7%  |
|    | 111A | -> | 117A | -0.14769 | 2%  |
|    | 113A | -> | 119A | 0.11217  | 1%  |
|    | 114A | -> | 119A | 0.12489  | 2%  |
|    | 115A | -> | 119A | 0.58807  | 36% |
|    | 108B | -> | 119B | -0.10009 | 1%  |
|    | 110B | -> | 117B | 0.26377  | 7%  |
|    | 111B | -> | 117B | -0.14769 | 2%  |
|    | 113B | -> | 119B | 0.11217  | 1%  |
|    | 114B | -> | 119B | 0.12489  | 2%  |
|    | 115B | -> | 119B | 0.58807  | 36% |
| 42 | 108A | -> | 116A | -0.12998 | 2%  |
|    | 110A | -> | 117A | 0.53572  | 31% |
|    | 110A | -> | 118A | 0.10032  | 1%  |
|    | 111A | -> | 117A | -0.30442 | 10% |
|    | 115A | -> | 119A | -0.24984 | 7%  |
|    | 108B | -> | 116B | -0.12998 | 2%  |
|    | 110B | -> | 117B | 0.53572  | 31% |

|    |      |    |      |          |     |
|----|------|----|------|----------|-----|
|    | 110B | -> | 118B | 0.10032  | 1%  |
|    | 111B | -> | 117B | -0.30442 | 10% |
|    | 115B | -> | 119B | -0.24984 | 7%  |
| 43 | 108A | -> | 116A | 0.67746  | 50% |
|    | 108B | -> | 116B | 0.67746  | 50% |
| 44 | 107A | -> | 119A | 0.15591  | 3%  |
|    | 108A | -> | 119A | -0.37786 | 16% |
|    | 109A | -> | 119A | 0.24810  | 7%  |
|    | 113A | -> | 119A | 0.10634  | 1%  |
|    | 115A | -> | 119A | 0.45733  | 23% |
|    | 107B | -> | 119B | -0.15591 | 3%  |
|    | 108B | -> | 119B | 0.37786  | 16% |
|    | 109B | -> | 119B | -0.24810 | 7%  |
|    | 113B | -> | 119B | -0.10634 | 1%  |
|    | 115B | -> | 119B | -0.45733 | 23% |
| 45 | 109A | -> | 119A | -0.24259 | 7%  |
|    | 110A | -> | 117A | -0.17822 | 4%  |
|    | 111A | -> | 117A | -0.33511 | 12% |
|    | 111A | -> | 123A | 0.16211  | 3%  |
|    | 112A | -> | 118A | 0.36341  | 15% |
|    | 112A | -> | 124A | -0.14940 | 2%  |
|    | 114A | -> | 119A | 0.23172  | 6%  |
|    | 115A | -> | 124A | -0.12025 | 2%  |
|    | 109B | -> | 119B | 0.24259  | 7%  |
|    | 110B | -> | 117B | 0.17822  | 4%  |
|    | 111B | -> | 117B | 0.33511  | 12% |
|    | 111B | -> | 123B | -0.16211 | 3%  |
|    | 112B | -> | 118B | -0.36341 | 15% |
|    | 112B | -> | 124B | 0.14940  | 2%  |
|    | 114B | -> | 119B | -0.23172 | 6%  |
|    | 115B | -> | 124B | 0.12025  | 2%  |
| 46 | 109A | -> | 119A | 0.20261  | 5%  |
|    | 111A | -> | 117A | 0.13708  | 2%  |
|    | 111A | -> | 118A | 0.12133  | 2%  |
|    | 112A | -> | 118A | 0.55961  | 37% |
|    | 114A | -> | 119A | -0.20079 | 5%  |
|    | 109B | -> | 119B | -0.20261 | 5%  |
|    | 111B | -> | 117B | -0.13708 | 2%  |
|    | 111B | -> | 118B | -0.12133 | 2%  |
|    | 112B | -> | 118B | -0.55961 | 37% |
|    | 114B | -> | 119B | 0.20079  | 5%  |
| 47 | 108A | -> | 119A | -0.21008 | 5%  |
|    | 109A | -> | 119A | -0.29397 | 10% |
|    | 110A | -> | 117A | 0.12879  | 2%  |
|    | 110A | -> | 118A | -0.13838 | 2%  |

|    |      |    |      |          |     |
|----|------|----|------|----------|-----|
|    | 111A | -> | 117A | 0.35934  | 15% |
|    | 111A | -> | 118A | 0.15869  | 3%  |
|    | 111A | -> | 123A | -0.10467 | 1%  |
|    | 114A | -> | 119A | 0.31407  | 11% |
|    | 108B | -> | 119B | 0.21008  | 5%  |
|    | 109B | -> | 119B | 0.29397  | 10% |
|    | 110B | -> | 117B | -0.12879 | 2%  |
|    | 110B | -> | 118B | 0.13838  | 2%  |
|    | 111B | -> | 117B | -0.35934 | 15% |
|    | 111B | -> | 118B | -0.15869 | 3%  |
|    | 111B | -> | 123B | 0.10467  | 1%  |
|    | 114B | -> | 119B | -0.31407 | 11% |
| 48 | 112A | -> | 118A | 0.68240  | 50% |
|    | 112B | -> | 118B | 0.68240  | 50% |
| 49 | 106A | -> | 116A | 0.14812  | 3%  |
|    | 110A | -> | 117A | 0.15400  | 3%  |
|    | 110A | -> | 118A | 0.57431  | 38% |
|    | 111A | -> | 118A | -0.21790 | 5%  |
|    | 112A | -> | 118A | 0.11929  | 2%  |
|    | 106B | -> | 116B | -0.14812 | 3%  |
|    | 110B | -> | 117B | -0.15400 | 3%  |
|    | 110B | -> | 118B | -0.57431 | 38% |
|    | 111B | -> | 118B | 0.21790  | 5%  |
|    | 112B | -> | 118B | -0.11929 | 2%  |
| 50 | 105A | -> | 116A | 0.12964  | 2%  |
|    | 107A | -> | 116A | -0.65845 | 47% |
|    | 108A | -> | 116A | -0.10173 | 1%  |
|    | 105B | -> | 116B | -0.12964 | 2%  |
|    | 107B | -> | 116B | 0.65845  | 47% |
|    | 108B | -> | 116B | 0.10173  | 1%  |
| 51 | 110A | -> | 117A | 0.33177  | 12% |
|    | 110A | -> | 118A | 0.11026  | 1%  |
|    | 111A | -> | 117A | 0.58878  | 37% |
|    | 110B | -> | 117B | 0.33177  | 12% |
|    | 110B | -> | 118B | 0.11026  | 1%  |
|    | 111B | -> | 117B | 0.58878  | 37% |
| 52 | 105A | -> | 116A | -0.12551 | 2%  |
|    | 107A | -> | 116A | 0.67947  | 48% |
|    | 105B | -> | 116B | -0.12551 | 2%  |
|    | 107B | -> | 116B | 0.67947  | 48% |
| 53 | 109A | -> | 117A | 0.54559  | 34% |
|    | 111A | -> | 117A | 0.13795  | 2%  |
|    | 111A | -> | 123A | 0.19139  | 4%  |
|    | 112A | -> | 124A | -0.20053 | 5%  |
|    | 114A | -> | 117A | -0.11246 | 1%  |

|    |      |    |      |          |     |
|----|------|----|------|----------|-----|
|    | 115A | -> | 124A | -0.17171 | 3%  |
|    | 109B | -> | 117B | -0.54559 | 34% |
|    | 111B | -> | 117B | -0.13795 | 2%  |
|    | 111B | -> | 123B | -0.19139 | 4%  |
|    | 112B | -> | 124B | 0.20053  | 5%  |
|    | 114B | -> | 117B | 0.11246  | 1%  |
|    | 115B | -> | 124B | 0.17171  | 3%  |
| 54 | 109A | -> | 117A | 0.36532  | 16% |
|    | 110A | -> | 117A | -0.16603 | 3%  |
|    | 111A | -> | 117A | -0.30162 | 11% |
|    | 111A | -> | 123A | -0.22688 | 6%  |
|    | 112A | -> | 124A | 0.26620  | 8%  |
|    | 115A | -> | 124A | 0.22681  | 6%  |
|    | 109B | -> | 117B | -0.36532 | 16% |
|    | 110B | -> | 117B | 0.16603  | 3%  |
|    | 111B | -> | 117B | 0.30162  | 11% |
|    | 111B | -> | 123B | 0.22688  | 6%  |
|    | 112B | -> | 124B | -0.26620 | 8%  |
|    | 115B | -> | 124B | -0.22681 | 6%  |
| 55 | 109A | -> | 117A | 0.59211  | 37% |
|    | 110A | -> | 118A | 0.28340  | 9%  |
|    | 111A | -> | 118A | -0.19612 | 4%  |
|    | 109B | -> | 117B | 0.59211  | 37% |
|    | 110B | -> | 118B | 0.28340  | 9%  |
|    | 111B | -> | 118B | -0.19612 | 4%  |
| 56 | 109A | -> | 117A | -0.29767 | 10% |
|    | 109A | -> | 119A | 0.27086  | 8%  |
|    | 110A | -> | 118A | 0.47850  | 25% |
|    | 111A | -> | 118A | -0.19125 | 4%  |
|    | 114A | -> | 119A | -0.18008 | 4%  |
|    | 109B | -> | 117B | -0.29767 | 10% |
|    | 109B | -> | 119B | 0.27086  | 8%  |
|    | 110B | -> | 118B | 0.47850  | 25% |
|    | 111B | -> | 118B | -0.19125 | 4%  |
|    | 114B | -> | 119B | -0.18008 | 4%  |
| 57 | 109A | -> | 117A | 0.15873  | 3%  |
|    | 109A | -> | 119A | 0.47537  | 24% |
|    | 110A | -> | 118A | -0.25777 | 7%  |
|    | 111A | -> | 119A | 0.13544  | 2%  |
|    | 114A | -> | 119A | -0.36005 | 14% |
|    | 109B | -> | 117B | 0.15873  | 3%  |
|    | 109B | -> | 119B | 0.47537  | 24% |
|    | 110B | -> | 118B | -0.25777 | 7%  |
|    | 111B | -> | 119B | 0.13544  | 2%  |
|    | 114B | -> | 119B | -0.36005 | 14% |

|      |      |      |      |          |          |
|------|------|------|------|----------|----------|
| 58   | 106A | ->   | 116A | 0.16446  | 3%       |
|      | 106A | ->   | 117A | 0.30886  | 11%      |
|      | 109A | ->   | 118A | 0.49133  | 28%      |
|      | 111A | ->   | 118A | 0.23021  | 6%       |
|      | 114A | ->   | 118A | -0.13781 | 2%       |
|      | 106B | ->   | 116B | -0.16446 | 3%       |
|      | 106B | ->   | 117B | -0.30886 | 11%      |
|      | 109B | ->   | 118B | -0.49133 | 28%      |
|      | 111B | ->   | 118B | -0.23021 | 6%       |
|      | 114B | ->   | 118B | 0.13781  | 2%       |
|      | 59   | 105A | ->   | 119A     | -0.24228 |
| 107A |      | ->   | 119A | 0.38420  | 16%      |
| 108A |      | ->   | 119A | 0.14069  | 2%       |
| 111A |      | ->   | 119A | -0.19670 | 4%       |
| 112A |      | ->   | 119A | 0.41799  | 19%      |
| 113A |      | ->   | 119A | 0.14680  | 2%       |
| 105B |      | ->   | 119B | 0.24228  | 6%       |
| 107B |      | ->   | 119B | -0.38420 | 16%      |
| 108B |      | ->   | 119B | -0.14069 | 2%       |
| 111B |      | ->   | 119B | 0.19670  | 4%       |
| 112B |      | ->   | 119B | -0.41799 | 19%      |
| 60   | 113B | ->   | 119B | -0.14680 | 2%       |
|      | 109A | ->   | 118A | 0.30571  | 10%      |
|      | 110A | ->   | 118A | 0.21645  | 5%       |
|      | 111A | ->   | 118A | 0.56912  | 35%      |
|      | 109B | ->   | 118B | 0.30571  | 10%      |
|      | 110B | ->   | 118B | 0.21645  | 5%       |
|      | 111B | ->   | 118B | 0.56912  | 35%      |
| 61   | 101A | ->   | 118A | -0.10013 | 1%       |
|      | 106A | ->   | 116A | 0.14879  | 2%       |
|      | 106A | ->   | 117A | 0.42140  | 20%      |
|      | 109A | ->   | 118A | -0.14434 | 2%       |
|      | 110A | ->   | 118A | -0.26288 | 8%       |
|      | 111A | ->   | 117A | 0.10093  | 1%       |
|      | 111A | ->   | 118A | -0.37318 | 16%      |
|      | 101B | ->   | 118B | 0.10013  | 1%       |
|      | 106B | ->   | 116B | -0.14879 | 2%       |
|      | 106B | ->   | 117B | -0.42140 | 20%      |
|      | 109B | ->   | 118B | 0.14434  | 2%       |
| 62   | 110B | ->   | 118B | 0.26288  | 8%       |
|      | 111B | ->   | 117B | -0.10093 | 1%       |
|      | 111B | ->   | 118B | 0.37318  | 16%      |
|      | 105A | ->   | 116A | -0.11125 | 2%       |
|      | 106A | ->   | 117A | 0.29103  | 10%      |
|      | 109A | ->   | 118A | -0.36509 | 16%      |

|    |      |    |      |          |     |
|----|------|----|------|----------|-----|
|    | 111A | -> | 118A | 0.42606  | 22% |
|    | 105B | -> | 116B | 0.11125  | 2%  |
|    | 106B | -> | 117B | -0.29103 | 10% |
|    | 109B | -> | 118B | 0.36509  | 16% |
|    | 111B | -> | 118B | -0.42606 | 22% |
| 63 | 105A | -> | 116A | -0.65404 | 47% |
|    | 107A | -> | 116A | -0.12364 | 2%  |
|    | 111A | -> | 118A | -0.10767 | 1%  |
|    | 105B | -> | 116B | 0.65404  | 47% |
|    | 107B | -> | 116B | 0.12364  | 2%  |
|    | 111B | -> | 118B | 0.10767  | 1%  |
| 64 | 109A | -> | 118A | 0.60062  | 39% |
|    | 110A | -> | 118A | -0.17720 | 3%  |
|    | 111A | -> | 118A | -0.26990 | 8%  |
|    | 109B | -> | 118B | 0.60062  | 39% |
|    | 110B | -> | 118B | -0.17720 | 3%  |
|    | 111B | -> | 118B | -0.26990 | 8%  |
| 65 | 105A | -> | 116A | 0.66650  | 48% |
|    | 107A | -> | 116A | 0.12384  | 2%  |
|    | 105B | -> | 116B | 0.66650  | 48% |
|    | 107B | -> | 116B | 0.12384  | 2%  |
| 66 | 105A | -> | 119A | 0.13390  | 2%  |
|    | 109A | -> | 119A | -0.13883 | 2%  |
|    | 110A | -> | 119A | 0.22465  | 5%  |
|    | 111A | -> | 119A | 0.56145  | 33% |
|    | 112A | -> | 119A | -0.27029 | 8%  |
|    | 105B | -> | 119B | 0.13390  | 2%  |
|    | 109B | -> | 119B | -0.13883 | 2%  |
|    | 110B | -> | 119B | 0.22465  | 5%  |
|    | 111B | -> | 119B | 0.56145  | 33% |
|    | 112B | -> | 119B | -0.27029 | 8%  |
| 67 | 107A | -> | 119A | 0.30712  | 10% |
|    | 109A | -> | 119A | -0.12775 | 2%  |
|    | 110A | -> | 119A | 0.22528  | 5%  |
|    | 111A | -> | 119A | 0.56086  | 33% |
|    | 107B | -> | 119B | -0.30712 | 10% |
|    | 109B | -> | 119B | 0.12775  | 2%  |
|    | 110B | -> | 119B | -0.22528 | 5%  |
|    | 111B | -> | 119B | -0.56086 | 33% |
| 68 | 108A | -> | 117A | 0.68462  | 50% |
|    | 108B | -> | 117B | -0.68462 | 50% |
| 69 | 108A | -> | 117A | 0.69041  | 50% |
|    | 108B | -> | 117B | 0.69041  | 50% |
| 70 | 101A | -> | 116A | 0.25928  | 7%  |
|    | 101A | -> | 117A | -0.17995 | 4%  |

|    |      |    |      |          |     |
|----|------|----|------|----------|-----|
|    | 102A | -> | 117A | 0.23907  | 6%  |
|    | 104A | -> | 118A | 0.16981  | 3%  |
|    | 106A | -> | 118A | 0.33960  | 13% |
|    | 106A | -> | 120A | 0.22119  | 5%  |
|    | 109A | -> | 118A | -0.24711 | 7%  |
|    | 110A | -> | 118A | 0.12878  | 2%  |
|    | 114A | -> | 120A | -0.14904 | 2%  |
|    | 101B | -> | 116B | -0.25928 | 7%  |
|    | 101B | -> | 117B | 0.17995  | 4%  |
|    | 102B | -> | 117B | -0.23907 | 6%  |
|    | 104B | -> | 118B | -0.16981 | 3%  |
|    | 106B | -> | 118B | -0.33960 | 13% |
|    | 106B | -> | 120B | -0.22119 | 5%  |
|    | 109B | -> | 118B | 0.24711  | 7%  |
|    | 110B | -> | 118B | -0.12878 | 2%  |
|    | 114B | -> | 120B | 0.14904  | 2%  |
| 71 | 111A | -> | 124A | -0.11861 | 2%  |
|    | 112A | -> | 120A | -0.11627 | 1%  |
|    | 112A | -> | 123A | 0.35181  | 14% |
|    | 113A | -> | 123A | 0.12996  | 2%  |
|    | 115A | -> | 120A | -0.37270 | 15% |
|    | 115A | -> | 123A | 0.38202  | 16% |
|    | 111B | -> | 124B | 0.11861  | 2%  |
|    | 112B | -> | 120B | 0.11627  | 1%  |
|    | 112B | -> | 123B | -0.35181 | 14% |
|    | 113B | -> | 123B | -0.12996 | 2%  |
|    | 115B | -> | 120B | 0.37270  | 15% |
|    | 115B | -> | 123B | -0.38202 | 16% |
| 72 | 102A | -> | 118A | -0.10697 | 1%  |
|    | 103A | -> | 116A | 0.14925  | 3%  |
|    | 104A | -> | 116A | -0.29818 | 10% |
|    | 106A | -> | 118A | 0.19503  | 4%  |
|    | 114A | -> | 120A | 0.49941  | 29% |
|    | 115A | -> | 120A | -0.12408 | 2%  |
|    | 102B | -> | 118B | 0.10697  | 1%  |
|    | 103B | -> | 116B | -0.14925 | 3%  |
|    | 104B | -> | 116B | 0.29818  | 10% |
|    | 106B | -> | 118B | -0.19503 | 4%  |
|    | 114B | -> | 120B | -0.49941 | 29% |
|    | 115B | -> | 120B | 0.12408  | 2%  |
| 73 | 105A | -> | 119A | 0.11676  | 1%  |
|    | 106A | -> | 116A | 0.56868  | 35% |
|    | 106A | -> | 117A | 0.12326  | 2%  |
|    | 107A | -> | 119A | -0.13821 | 2%  |
|    | 109A | -> | 118A | 0.11726  | 1%  |

|    |      |    |      |          |     |
|----|------|----|------|----------|-----|
|    | 111A | -> | 119A | -0.10018 | 1%  |
|    | 112A | -> | 119A | -0.10110 | 1%  |
|    | 114A | -> | 120A | 0.17997  | 4%  |
|    | 115A | -> | 120A | -0.15675 | 3%  |
|    | 105B | -> | 119B | 0.11676  | 1%  |
|    | 106B | -> | 116B | 0.56868  | 35% |
|    | 106B | -> | 117B | 0.12326  | 2%  |
|    | 107B | -> | 119B | -0.13821 | 2%  |
|    | 109B | -> | 118B | 0.11726  | 1%  |
|    | 111B | -> | 119B | -0.10018 | 1%  |
|    | 112B | -> | 119B | -0.10110 | 1%  |
|    | 114B | -> | 120B | 0.17997  | 4%  |
|    | 115B | -> | 120B | -0.15675 | 3%  |
| 74 | 101A | -> | 116A | 0.18390  | 4%  |
|    | 102A | -> | 118A | -0.10487 | 1%  |
|    | 103A | -> | 116A | 0.20035  | 5%  |
|    | 104A | -> | 116A | -0.42817 | 22% |
|    | 106A | -> | 118A | -0.32572 | 13% |
|    | 114A | -> | 120A | -0.21153 | 5%  |
|    | 101B | -> | 116B | -0.18390 | 4%  |
|    | 102B | -> | 118B | 0.10487  | 1%  |
|    | 103B | -> | 116B | -0.20035 | 5%  |
|    | 104B | -> | 116B | 0.42817  | 22% |
|    | 106B | -> | 118B | 0.32572  | 13% |
|    | 114B | -> | 120B | 0.21153  | 5%  |
| 75 | 106A | -> | 116A | 0.17276  | 3%  |
|    | 113A | -> | 120A | -0.21978 | 5%  |
|    | 114A | -> | 120A | -0.22396 | 5%  |
|    | 115A | -> | 120A | 0.58594  | 36% |
|    | 106B | -> | 116B | 0.17276  | 3%  |
|    | 113B | -> | 120B | -0.21978 | 5%  |
|    | 114B | -> | 120B | -0.22396 | 5%  |
|    | 115B | -> | 120B | 0.58594  | 36% |
| 76 | 113A | -> | 120A | -0.17851 | 3%  |
|    | 114A | -> | 120A | 0.62515  | 42% |
|    | 115A | -> | 120A | 0.21899  | 5%  |
|    | 113B | -> | 120B | -0.17851 | 3%  |
|    | 114B | -> | 120B | 0.62515  | 42% |
|    | 115B | -> | 120B | 0.21899  | 5%  |
| 77 | 112A | -> | 123A | 0.19677  | 4%  |
|    | 113A | -> | 120A | -0.37272 | 16% |
|    | 114A | -> | 120A | 0.11042  | 1%  |
|    | 115A | -> | 120A | 0.46422  | 25% |
|    | 115A | -> | 123A | 0.17686  | 4%  |
|    | 112B | -> | 123B | -0.19677 | 4%  |



|    |      |    |      |          |     |
|----|------|----|------|----------|-----|
|    | 113B | -> | 120B | 0.37272  | 16% |
|    | 114B | -> | 120B | -0.11042 | 1%  |
|    | 115B | -> | 120B | -0.46422 | 25% |
|    | 115B | -> | 123B | -0.17686 | 4%  |
| 78 | 107A | -> | 117A | -0.67462 | 48% |
|    | 108A | -> | 118A | 0.12947  | 2%  |
|    | 107B | -> | 117B | 0.67462  | 48% |
|    | 108B | -> | 118B | -0.12947 | 2%  |
| 79 | 107A | -> | 117A | 0.66754  | 47% |
|    | 108A | -> | 118A | -0.17648 | 3%  |
|    | 107B | -> | 117B | 0.66754  | 47% |
|    | 108B | -> | 118B | -0.17648 | 3%  |
| 80 | 101A | -> | 116A | 0.34707  | 14% |
|    | 102A | -> | 116A | 0.13813  | 2%  |
|    | 104A | -> | 116A | 0.16670  | 3%  |
|    | 106A | -> | 118A | -0.32433 | 13% |
|    | 106A | -> | 120A | 0.12085  | 2%  |
|    | 114A | -> | 120A | 0.36170  | 16% |
|    | 101B | -> | 116B | -0.34707 | 14% |
|    | 102B | -> | 116B | -0.13813 | 2%  |
|    | 104B | -> | 116B | -0.16670 | 3%  |
|    | 106B | -> | 118B | 0.32433  | 13% |
|    | 106B | -> | 120B | -0.12085 | 2%  |
|    | 114B | -> | 120B | -0.36170 | 16% |
| 81 | 105A | -> | 119A | -0.10390 | 1%  |
|    | 110A | -> | 123A | 0.15557  | 3%  |
|    | 111A | -> | 120A | -0.12287 | 2%  |
|    | 111A | -> | 123A | 0.43718  | 23% |
|    | 112A | -> | 124A | 0.22373  | 6%  |
|    | 113A | -> | 120A | -0.20251 | 5%  |
|    | 115A | -> | 124A | 0.29058  | 10% |
|    | 105B | -> | 119B | 0.10390  | 1%  |
|    | 110B | -> | 123B | -0.15557 | 3%  |
|    | 111B | -> | 120B | 0.12287  | 2%  |
|    | 111B | -> | 123B | -0.43718 | 23% |
|    | 112B | -> | 124B | -0.22373 | 6%  |
|    | 113B | -> | 120B | 0.20251  | 5%  |
|    | 115B | -> | 124B | -0.29058 | 10% |
| 82 | 105A | -> | 119A | 0.43235  | 21% |
|    | 106A | -> | 116A | -0.21865 | 5%  |
|    | 107A | -> | 119A | -0.19982 | 4%  |
|    | 110A | -> | 119A | -0.10193 | 1%  |
|    | 111A | -> | 119A | -0.23626 | 6%  |
|    | 112A | -> | 119A | -0.32477 | 12% |
|    | 105B | -> | 119B | 0.43235  | 21% |

|    |      |    |      |          |     |
|----|------|----|------|----------|-----|
|    | 106B | -> | 116B | -0.21865 | 5%  |
|    | 107B | -> | 119B | -0.19982 | 4%  |
|    | 110B | -> | 119B | -0.10193 | 1%  |
|    | 111B | -> | 119B | -0.23626 | 6%  |
|    | 112B | -> | 119B | -0.32477 | 12% |
| 83 | 113A | -> | 120A | 0.63478  | 42% |
|    | 115A | -> | 120A | 0.27058  | 8%  |
|    | 113B | -> | 120B | 0.63478  | 42% |
|    | 115B | -> | 120B | 0.27058  | 8%  |
| 84 | 107A | -> | 117A | 0.10597  | 1%  |
|    | 108A | -> | 118A | 0.48772  | 27% |
|    | 111A | -> | 123A | -0.11356 | 1%  |
|    | 113A | -> | 120A | -0.35817 | 15% |
|    | 115A | -> | 120A | -0.19424 | 4%  |
|    | 115A | -> | 123A | -0.11265 | 1%  |
|    | 107B | -> | 117B | -0.10597 | 1%  |
|    | 108B | -> | 118B | -0.48772 | 27% |
|    | 111B | -> | 123B | 0.11356  | 1%  |
|    | 113B | -> | 120B | 0.35817  | 15% |
|    | 115B | -> | 120B | 0.19424  | 4%  |
|    | 115B | -> | 123B | 0.11265  | 1%  |
| 85 | 108A | -> | 118A | 0.45032  | 23% |
|    | 113A | -> | 120A | 0.40393  | 18% |
|    | 115A | -> | 120A | 0.26935  | 8%  |
|    | 115A | -> | 123A | 0.10340  | 1%  |
|    | 108B | -> | 118B | -0.45032 | 23% |
|    | 113B | -> | 120B | -0.40393 | 18% |
|    | 115B | -> | 120B | -0.26935 | 8%  |
|    | 115B | -> | 123B | -0.10340 | 1%  |
| 86 | 105A | -> | 119A | 0.45083  | 23% |
|    | 107A | -> | 119A | 0.34988  | 14% |
|    | 108A | -> | 119A | 0.20081  | 4%  |
|    | 111A | -> | 119A | -0.16313 | 3%  |
|    | 111A | -> | 123A | 0.10722  | 1%  |
|    | 112A | -> | 119A | -0.20997 | 5%  |
|    | 105B | -> | 119B | -0.45083 | 23% |
|    | 107B | -> | 119B | -0.34988 | 14% |
|    | 108B | -> | 119B | -0.20081 | 4%  |
|    | 111B | -> | 119B | 0.16313  | 3%  |
|    | 111B | -> | 123B | -0.10722 | 1%  |
|    | 112B | -> | 119B | 0.20997  | 5%  |
| 87 | 107A | -> | 117A | 0.17403  | 3%  |
|    | 108A | -> | 118A | 0.67707  | 47% |
|    | 107B | -> | 117B | 0.17403  | 3%  |
|    | 108B | -> | 118B | 0.67707  | 47% |

|    |      |    |      |          |     |
|----|------|----|------|----------|-----|
| 88 | 101A | -> | 116A | 0.21484  | 5%  |
|    | 102A | -> | 116A | -0.60332 | 40% |
|    | 104A | -> | 118A | -0.13127 | 2%  |
|    | 106A | -> | 120A | 0.15372  | 3%  |
|    | 101B | -> | 116B | -0.21484 | 5%  |
|    | 102B | -> | 116B | 0.60332  | 40% |
|    | 104B | -> | 118B | 0.13127  | 2%  |
|    | 106B | -> | 120B | -0.15372 | 3%  |
| 89 | 114A | -> | 121A | -0.31258 | 10% |
|    | 115A | -> | 121A | 0.62068  | 40% |
|    | 114B | -> | 121B | 0.31258  | 10% |
|    | 115B | -> | 121B | -0.62068 | 40% |
| 90 | 114A | -> | 121A | -0.28985 | 9%  |
|    | 115A | -> | 121A | 0.63784  | 41% |
|    | 114B | -> | 121B | -0.28985 | 9%  |
|    | 115B | -> | 121B | 0.63784  | 41% |
| 91 | 114A | -> | 121A | -0.62533 | 40% |
|    | 115A | -> | 121A | -0.30670 | 10% |
|    | 114B | -> | 121B | 0.62533  | 40% |
|    | 115B | -> | 121B | 0.30670  | 10% |
| 92 | 114A | -> | 121A | 0.63828  | 42% |
|    | 115A | -> | 121A | 0.28865  | 8%  |
|    | 114B | -> | 121B | 0.63828  | 42% |
|    | 115B | -> | 121B | 0.28865  | 8%  |
| 93 | 107A | -> | 118A | -0.66938 | 48% |
|    | 108A | -> | 118A | -0.12791 | 2%  |
|    | 107B | -> | 118B | 0.66938  | 48% |
|    | 108B | -> | 118B | 0.12791  | 2%  |
| 94 | 107A | -> | 118A | 0.68662  | 50% |
|    | 107B | -> | 118B | 0.68662  | 50% |
| 95 | 113A | -> | 121A | -0.67242 | 48% |
|    | 113A | -> | 124A | -0.10686 | 1%  |
|    | 113A | -> | 126A | 0.10030  | 1%  |
|    | 113B | -> | 121B | 0.67242  | 48% |
|    | 113B | -> | 124B | 0.10686  | 1%  |
|    | 113B | -> | 126B | -0.10030 | 1%  |
| 96 | 113A | -> | 121A | 0.68979  | 50% |
|    | 113B | -> | 121B | 0.68979  | 50% |
| 97 | 112A | -> | 120A | 0.67340  | 50% |
|    | 112B | -> | 120B | 0.67340  | 50% |
| 98 | 105A | -> | 117A | -0.12103 | 2%  |
|    | 111A | -> | 124A | -0.10196 | 1%  |
|    | 112A | -> | 120A | 0.65021  | 45% |
|    | 115A | -> | 123A | 0.14991  | 2%  |
|    | 105B | -> | 117B | 0.12103  | 2%  |

|     |      |    |      |          |     |
|-----|------|----|------|----------|-----|
|     | 111B | -> | 124B | 0.10196  | 1%  |
|     | 112B | -> | 120B | -0.65021 | 45% |
|     | 115B | -> | 123B | -0.14991 | 2%  |
| 99  | 105A | -> | 117A | -0.52747 | 32% |
|     | 111A | -> | 124A | 0.28554  | 10% |
|     | 113A | -> | 124A | -0.17821 | 4%  |
|     | 115A | -> | 124A | 0.19279  | 4%  |
|     | 105B | -> | 117B | 0.52747  | 32% |
|     | 111B | -> | 124B | -0.28554 | 10% |
|     | 113B | -> | 124B | 0.17821  | 4%  |
|     | 115B | -> | 124B | -0.19279 | 4%  |
| 100 | 105A | -> | 117A | -0.41263 | 19% |
|     | 110A | -> | 124A | -0.11127 | 1%  |
|     | 111A | -> | 124A | -0.32177 | 12% |
|     | 112A | -> | 120A | -0.14757 | 2%  |
|     | 112A | -> | 124A | 0.11837  | 2%  |
|     | 113A | -> | 124A | 0.25326  | 7%  |
|     | 115A | -> | 124A | -0.22509 | 6%  |
|     | 105B | -> | 117B | 0.41263  | 19% |
|     | 110B | -> | 124B | 0.11127  | 1%  |
|     | 111B | -> | 124B | 0.32177  | 12% |
|     | 112B | -> | 120B | 0.14757  | 2%  |
|     | 112B | -> | 124B | -0.11837 | 2%  |
|     | 113B | -> | 124B | -0.25326 | 7%  |
|     | 115B | -> | 124B | 0.22509  | 6%  |

---

**Table S32.** TD-DFT calculated transition Kohn-Sham orbital contributions for [Ni(dtbbpy)Cl<sub>2</sub>] T<sub>0</sub>(x).

| Excited State | KS Orbital Transition |      | $C_i$    | $C_i^2/\sum C_i^2$ |         |
|---------------|-----------------------|------|----------|--------------------|---------|
| 1             | 91B                   | ->   | 105B     | 0.28387            | 8%      |
|               | 92B                   | ->   | 105B     | 0.22667            | 5%      |
|               | 93B                   | ->   | 106B     | -0.19999           | 4%      |
|               | 94B                   | ->   | 105B     | 0.29985            | 9%      |
|               | 97B                   | ->   | 106B     | -0.27455           | 7%      |
|               | 99B                   | ->   | 105B     | -0.32659           | 10%     |
|               | 102B                  | ->   | 106B     | 0.31741            | 10%     |
|               | 103B                  | ->   | 105B     | 0.68765            | 46%     |
|               | 103B                  | <-   | 105B     | 0.10673            | 1%      |
|               | 2                     | 91B  | ->       | 106B               | 0.22416 |
| 92B           |                       | ->   | 106B     | 0.17882            | 3%      |
| 93B           |                       | ->   | 105B     | -0.30503           | 9%      |
| 94B           |                       | ->   | 106B     | 0.24026            | 6%      |
| 97B           |                       | ->   | 105B     | -0.41863           | 17%     |
| 99B           |                       | ->   | 106B     | -0.23741           | 5%      |
| 102B          |                       | ->   | 105B     | 0.53176            | 27%     |
| 103B          |                       | ->   | 106B     | 0.52380            | 26%     |
| 97B           |                       | <-   | 105B     | -0.10139           | 1%      |
| 102B          |                       | <-   | 105B     | 0.10048            | 1%      |
| 3             | 95B                   | ->   | 106B     | 0.65500            | 42%     |
|               | 96B                   | ->   | 106B     | 0.69495            | 47%     |
|               | 101B                  | ->   | 106B     | 0.31241            | 9%      |
|               | 95B                   | <-   | 106B     | 0.10261            | 1%      |
|               | 96B                   | <-   | 106B     | 0.10871            | 1%      |
| 4             | 91B                   | ->   | 106B     | 0.19802            | 4%      |
|               | 92B                   | ->   | 106B     | 0.15813            | 3%      |
|               | 93B                   | ->   | 105B     | 0.23962            | 6%      |
|               | 94B                   | ->   | 106B     | 0.20823            | 4%      |
|               | 97B                   | ->   | 105B     | 0.33612            | 11%     |
|               | 99B                   | ->   | 106B     | -0.24860           | 6%      |
|               | 102B                  | ->   | 105B     | -0.53303           | 29%     |
|               | 103B                  | ->   | 106B     | 0.60533            | 37%     |
| 5             | 91B                   | ->   | 105B     | -0.11782           | 1%      |
|               | 93B                   | ->   | 106B     | -0.33188           | 11%     |
|               | 94B                   | ->   | 105B     | -0.12805           | 2%      |
|               | 97B                   | ->   | 106B     | -0.46510           | 22%     |
|               | 99B                   | ->   | 105B     | 0.12366            | 2%      |
|               | 102B                  | ->   | 106B     | 0.66965            | 46%     |
| 103B          | ->                    | 105B | -0.39915 | 16%                |         |
| 6             | 95B                   | ->   | 105B     | 0.59955            | 37%     |

|    |      |    |      |          |      |
|----|------|----|------|----------|------|
|    | 96B  | -> | 105B | 0.67209  | 46%  |
|    | 101B | -> | 105B | 0.40905  | 17%  |
| 7  | 103B | -> | 104B | 0.98441  | 100% |
| 8  | 102B | -> | 104B | 0.98969  | 100% |
| 9  | 104A | -> | 106A | 0.98409  | 99%  |
|    | 99B  | -> | 105B | -0.10230 | 1%   |
| 10 | 105A | -> | 106A | 0.98888  | 99%  |
|    | 103B | -> | 104B | -0.10111 | 1%   |
| 11 | 103A | -> | 106A | 0.98999  | 100% |
| 12 | 98A  | -> | 106A | 0.14737  | 2%   |
|    | 102A | -> | 106A | 0.98057  | 98%  |
| 13 | 95A  | -> | 109A | 0.13832  | 2%   |
|    | 96A  | -> | 108A | -0.12939 | 2%   |
|    | 97A  | -> | 106A | -0.13025 | 2%   |
|    | 97A  | -> | 107A | -0.12619 | 2%   |
|    | 99A  | -> | 106A | -0.59968 | 39%  |
|    | 99A  | -> | 107A | 0.22270  | 5%   |
|    | 103A | -> | 106A | -0.10246 | 1%   |
|    | 92B  | -> | 109B | 0.10791  | 1%   |
|    | 94B  | -> | 108B | -0.10646 | 1%   |
|    | 97B  | -> | 107B | 0.11948  | 2%   |
|    | 98B  | -> | 104B | 0.60360  | 39%  |
|    | 98B  | -> | 107B | -0.20194 | 4%   |
| 14 | 100B | -> | 105B | 0.99212  | 100% |
| 15 | 101A | -> | 106A | 0.10481  | 1%   |
|    | 99B  | -> | 104B | -0.15160 | 2%   |
|    | 100B | -> | 106B | -0.11780 | 1%   |
|    | 101B | -> | 105B | -0.21601 | 5%   |
|    | 103B | -> | 107B | 0.92650  | 90%  |
| 16 | 91B  | -> | 106B | -0.12439 | 2%   |
|    | 94B  | -> | 106B | -0.11255 | 1%   |
|    | 97B  | -> | 105B | 0.12748  | 2%   |
|    | 99B  | -> | 106B | 0.81451  | 68%  |
|    | 102B | -> | 105B | 0.16876  | 3%   |
|    | 103B | -> | 106B | 0.48662  | 24%  |
| 17 | 95B  | -> | 105B | -0.12981 | 2%   |
|    | 96B  | -> | 105B | -0.25248 | 6%   |
|    | 99B  | -> | 104B | 0.18377  | 3%   |
|    | 100B | -> | 106B | 0.68131  | 47%  |
|    | 101B | -> | 105B | 0.57589  | 33%  |
|    | 103B | -> | 107B | 0.28289  | 8%   |
| 18 | 104A | -> | 106A | 0.12222  | 2%   |
|    | 104A | -> | 107A | -0.13532 | 2%   |
|    | 91B  | -> | 105B | -0.14948 | 2%   |
|    | 92B  | -> | 105B | -0.11862 | 1%   |

|    |      |    |      |          |     |
|----|------|----|------|----------|-----|
|    | 94B  | -> | 105B | -0.16029 | 3%  |
|    | 97B  | -> | 106B | -0.16115 | 3%  |
|    | 99B  | -> | 105B | 0.73068  | 55% |
|    | 101B | -> | 104B | 0.31299  | 10% |
|    | 102B | -> | 106B | -0.10151 | 1%  |
|    | 103B | -> | 105B | 0.46392  | 22% |
| 19 | 96B  | -> | 106B | -0.33326 | 11% |
|    | 101B | -> | 106B | 0.91990  | 86% |
|    | 102B | -> | 107B | -0.17870 | 3%  |
| 20 | 99B  | -> | 105B | -0.25100 | 6%  |
|    | 101B | -> | 104B | 0.94508  | 91% |
|    | 103B | -> | 105B | -0.16231 | 3%  |
| 21 | 93B  | -> | 105B | -0.16474 | 3%  |
|    | 97B  | -> | 105B | -0.27454 | 8%  |
|    | 99B  | -> | 106B | 0.16434  | 3%  |
|    | 100B | -> | 104B | 0.88547  | 79% |
|    | 102B | -> | 105B | -0.27216 | 7%  |
| 22 | 101A | -> | 106A | -0.29717 | 10% |
|    | 99B  | -> | 104B | 0.86789  | 82% |
|    | 100B | -> | 106B | -0.20535 | 5%  |
|    | 101B | -> | 105B | -0.10837 | 1%  |
|    | 103B | -> | 107B | 0.16782  | 3%  |
| 23 | 101B | -> | 106B | 0.16992  | 3%  |
|    | 102B | -> | 107B | 0.97646  | 97% |
| 24 | 93B  | -> | 105B | 0.32587  | 11% |
|    | 97B  | -> | 105B | 0.54883  | 30% |
|    | 98B  | -> | 105B | 0.10612  | 1%  |
|    | 99B  | -> | 106B | -0.18874 | 4%  |
|    | 100B | -> | 104B | 0.45383  | 21% |
|    | 102B | -> | 105B | 0.57823  | 34% |
| 25 | 104A | -> | 107A | 0.96379  | 97% |
|    | 97B  | -> | 106B | -0.13097 | 2%  |
|    | 102B | -> | 106B | -0.12110 | 2%  |
| 26 | 105A | -> | 107A | 0.91265  | 86% |
|    | 100B | -> | 106B | -0.29673 | 9%  |
|    | 101B | -> | 105B | 0.22664  | 5%  |
| 27 | 105A | -> | 107A | -0.37490 | 15% |
|    | 95B  | -> | 105B | -0.31933 | 11% |
|    | 99B  | -> | 104B | -0.10880 | 1%  |
|    | 100B | -> | 106B | -0.58711 | 36% |
|    | 101B | -> | 105B | 0.59701  | 37% |
|    | 102B | -> | 108B | -0.11537 | 1%  |
| 28 | 99A  | -> | 106A | -0.14275 | 2%  |
|    | 103B | -> | 108B | 0.97490  | 98% |
| 29 | 104A | -> | 107A | 0.16573  | 3%  |

|    |      |    |      |          |      |
|----|------|----|------|----------|------|
|    | 91B  | -> | 105B | -0.12271 | 2%   |
|    | 93B  | -> | 106B | 0.33080  | 11%  |
|    | 94B  | -> | 105B | -0.18917 | 4%   |
|    | 97B  | -> | 106B | 0.57237  | 34%  |
|    | 98B  | -> | 106B | 0.11385  | 1%   |
|    | 102B | -> | 106B | 0.63126  | 41%  |
|    | 103B | -> | 105B | 0.22446  | 5%   |
| 30 | 103A | -> | 107A | 0.99269  | 100% |
|    | 101A | -> | 106A | 0.85631  | 80%  |
|    | 99B  | -> | 104B | 0.36742  | 15%  |
|    | 99B  | -> | 107B | -0.13400 | 2%   |
|    | 102B | -> | 108B | 0.16764  | 3%   |
| 32 | 101A | -> | 106A | -0.12450 | 2%   |
|    | 102B | -> | 108B | 0.97294  | 98%  |
| 33 | 98A  | -> | 107A | 0.12544  | 2%   |
|    | 102A | -> | 106A | -0.10392 | 1%   |
|    | 102A | -> | 107A | 0.83003  | 70%  |
|    | 104A | -> | 108A | -0.51350 | 27%  |
| 34 | 100A | -> | 106A | 0.97326  | 98%  |
|    | 102A | -> | 108A | 0.12647  | 2%   |
| 35 | 102A | -> | 107A | 0.53792  | 29%  |
|    | 104A | -> | 108A | 0.83384  | 71%  |
| 36 | 99A  | -> | 106A | -0.12630 | 2%   |
|    | 99A  | -> | 107A | -0.16470 | 3%   |
|    | 105A | -> | 108A | 0.91546  | 89%  |
|    | 98B  | -> | 104B | 0.14922  | 2%   |
|    | 98B  | -> | 107B | 0.16387  | 3%   |
|    | 103B | -> | 108B | -0.10007 | 1%   |
| 37 | 95A  | -> | 106A | -0.14011 | 2%   |
|    | 95A  | -> | 107A | 0.14370  | 2%   |
|    | 96A  | -> | 107A | -0.21441 | 5%   |
|    | 97A  | -> | 108A | -0.21612 | 5%   |
|    | 99A  | -> | 108A | 0.21606  | 5%   |
|    | 99A  | -> | 109A | 0.14780  | 2%   |
|    | 101A | -> | 106A | 0.34482  | 13%  |
|    | 101A | -> | 107A | -0.27748 | 8%   |
|    | 103A | -> | 108A | -0.19364 | 4%   |
|    | 91B  | -> | 104B | 0.10775  | 1%   |
|    | 92B  | -> | 104B | -0.10287 | 1%   |
|    | 92B  | -> | 107B | 0.18694  | 4%   |
|    | 93B  | -> | 108B | -0.11797 | 1%   |
|    | 94B  | -> | 107B | -0.17758 | 3%   |
|    | 97B  | -> | 108B | 0.19442  | 4%   |
|    | 98B  | -> | 108B | -0.21143 | 5%   |
|    | 98B  | -> | 109B | -0.15175 | 2%   |



|    |      |    |      |          |      |
|----|------|----|------|----------|------|
|    | 99B  | -> | 107B | 0.54536  | 32%  |
| 38 | 95A  | -> | 108A | 0.14880  | 2%   |
|    | 96A  | -> | 108A | -0.13851 | 2%   |
|    | 97A  | -> | 106A | -0.11522 | 1%   |
|    | 97A  | -> | 107A | -0.13822 | 2%   |
|    | 99A  | -> | 106A | 0.32599  | 11%  |
|    | 99A  | -> | 107A | 0.47926  | 23%  |
|    | 101A | -> | 108A | -0.13165 | 2%   |
|    | 105A | -> | 108A | 0.38989  | 16%  |
|    | 92B  | -> | 108B | 0.16456  | 3%   |
|    | 94B  | -> | 108B | -0.11299 | 1%   |
|    | 97B  | -> | 104B | 0.11362  | 1%   |
|    | 97B  | -> | 107B | 0.16547  | 3%   |
|    | 98B  | -> | 104B | -0.22093 | 5%   |
|    | 98B  | -> | 107B | -0.45362 | 21%  |
|    | 99B  | -> | 108B | 0.20988  | 5%   |
|    | 103B | -> | 108B | 0.14524  | 2%   |
| 39 | 103A | -> | 108A | 0.97475  | 97%  |
|    | 99B  | -> | 107B | 0.17385  | 3%   |
| 40 | 94B  | -> | 105B | -0.10591 | 1%   |
|    | 101B | -> | 107B | 0.98074  | 99%  |
| 41 | 100B | -> | 107B | 0.99730  | 100% |
| 42 | 91B  | -> | 105B | 0.36587  | 14%  |
|    | 92B  | -> | 105B | 0.29469  | 9%   |
|    | 94B  | -> | 105B | 0.59968  | 37%  |
|    | 97B  | -> | 106B | 0.16874  | 3%   |
|    | 99B  | -> | 105B | 0.48387  | 24%  |
|    | 101B | -> | 107B | 0.17536  | 3%   |
|    | 102B | -> | 106B | 0.14471  | 2%   |
|    | 103B | -> | 105B | -0.26487 | 7%   |
| 43 | 96A  | -> | 108A | -0.12578 | 2%   |
| 43 | 97A  | -> | 106A | -0.49714 | 27%  |
| 43 | 99A  | -> | 106A | 0.10389  | 1%   |
|    | 99A  | -> | 107A | -0.33304 | 12%  |
|    | 101A | -> | 108A | -0.12652 | 2%   |
|    | 93B  | -> | 104B | -0.20895 | 5%   |
|    | 94B  | -> | 108B | -0.10637 | 1%   |
|    | 97B  | -> | 104B | 0.54927  | 33%  |
|    | 97B  | -> | 107B | 0.10157  | 1%   |
|    | 98B  | -> | 107B | 0.33455  | 12%  |
|    | 99B  | -> | 108B | 0.20835  | 5%   |
| 44 | 98A  | -> | 108A | 0.12265  | 2%   |
|    | 100A | -> | 106A | -0.14784 | 2%   |
|    | 102A | -> | 108A | 0.97113  | 96%  |
| 45 | 98A  | -> | 106A | -0.30180 | 9%   |

|    |      |    |      |          |     |
|----|------|----|------|----------|-----|
|    | 91B  | -> | 106B | 0.38306  | 15% |
|    | 92B  | -> | 106B | 0.30654  | 10% |
|    | 94B  | -> | 106B | 0.63468  | 41% |
|    | 99B  | -> | 106B | 0.36654  | 14% |
| 46 | 103B | -> | 106B | -0.32883 | 11% |
|    | 95A  | -> | 106A | 0.21497  | 5%  |
|    | 95A  | -> | 107A | -0.12203 | 2%  |
|    | 96A  | -> | 107A | 0.11893  | 1%  |
|    | 97A  | -> | 108A | 0.12507  | 2%  |
|    | 99A  | -> | 108A | -0.14896 | 2%  |
|    | 99A  | -> | 109A | -0.16257 | 3%  |
|    | 101A | -> | 107A | 0.25282  | 7%  |
|    | 91B  | -> | 104B | -0.14234 | 2%  |
|    | 92B  | -> | 104B | 0.10548  | 1%  |
|    | 92B  | -> | 107B | -0.16680 | 3%  |
|    | 97B  | -> | 108B | -0.12978 | 2%  |
|    | 98B  | -> | 108B | 0.19036  | 4%  |
|    | 98B  | -> | 109B | 0.14808  | 2%  |
| 47 | 99B  | -> | 107B | 0.77808  | 64% |
|    | 98A  | -> | 106A | 0.90427  | 85% |
|    | 102A | -> | 106A | -0.13474 | 2%  |
|    | 104A | -> | 108A | 0.15310  | 2%  |
|    | 91B  | -> | 106B | 0.14333  | 2%  |
|    | 92B  | -> | 106B | 0.11728  | 1%  |
|    | 94B  | -> | 106B | 0.20275  | 4%  |
|    | 99B  | -> | 106B | 0.11139  | 1%  |
| 48 | 103B | -> | 106B | -0.10645 | 1%  |
|    | 99A  | -> | 106A | 0.54570  | 31% |
|    | 99A  | -> | 107A | 0.10050  | 1%  |
|    | 101A | -> | 108A | 0.12823  | 2%  |
|    | 95B  | -> | 106B | -0.22093 | 5%  |
|    | 96B  | -> | 106B | 0.18262  | 4%  |
|    | 97B  | -> | 104B | -0.18863 | 4%  |
|    | 98B  | -> | 104B | 0.60012  | 38% |
|    | 98B  | -> | 107B | 0.22667  | 5%  |
|    | 99B  | -> | 108B | 0.30635  | 10% |
| 49 | 95A  | -> | 106A | 0.28798  | 9%  |
|    | 95A  | -> | 107A | 0.14768  | 2%  |
|    | 96A  | -> | 106A | 0.27035  | 8%  |
|    | 97A  | -> | 108A | 0.12909  | 2%  |
|    | 99A  | -> | 108A | 0.52428  | 30% |
|    | 101A | -> | 106A | -0.10842 | 1%  |
|    | 91B  | -> | 104B | -0.26019 | 7%  |
|    | 91B  | -> | 107B | -0.10523 | 1%  |
|    | 92B  | -> | 104B | 0.13302  | 2%  |

|    |      |    |      |          |      |
|----|------|----|------|----------|------|
|    | 92B  | -> | 107B | 0.11051  | 1%   |
|    | 94B  | -> | 104B | 0.25256  | 7%   |
|    | 98B  | -> | 108B | -0.52377 | 30%  |
| 50 | 101B | -> | 108B | 0.99843  | 100% |
| 51 | 100B | -> | 108B | 0.99822  | 100% |
| 52 | 95A  | -> | 106A | -0.17366 | 3%   |
|    | 95A  | -> | 107A | 0.13381  | 2%   |
|    | 99A  | -> | 108A | 0.20486  | 4%   |
|    | 99A  | -> | 109A | 0.13287  | 2%   |
|    | 101A | -> | 107A | 0.88291  | 80%  |
|    | 91B  | -> | 104B | 0.12624  | 2%   |
|    | 92B  | -> | 104B | -0.17503 | 3%   |
|    | 98B  | -> | 108B | -0.13739 | 2%   |
|    | 98B  | -> | 109B | -0.15101 | 2%   |
| 53 | 95B  | -> | 106B | 0.68193  | 48%  |
|    | 96B  | -> | 106B | -0.57932 | 35%  |
|    | 97B  | -> | 104B | -0.18644 | 4%   |
|    | 98B  | -> | 107B | 0.10058  | 1%   |
|    | 99B  | -> | 108B | 0.31780  | 10%  |
|    | 101B | -> | 106B | -0.14546 | 2%   |
| 54 | 97A  | -> | 106A | 0.21906  | 5%   |
|    | 97A  | -> | 107A | -0.18055 | 3%   |
|    | 99A  | -> | 106A | -0.26877 | 8%   |
|    | 99A  | -> | 107A | -0.19985 | 4%   |
|    | 101A | -> | 108A | -0.20754 | 4%   |
|    | 95B  | -> | 106B | -0.21881 | 5%   |
|    | 96B  | -> | 106B | 0.18697  | 4%   |
|    | 97B  | -> | 104B | -0.30499 | 10%  |
|    | 98B  | -> | 104B | -0.26700 | 7%   |
|    | 99B  | -> | 108B | 0.69131  | 50%  |
| 55 | 95A  | -> | 106A | -0.38536 | 16%  |
|    | 96A  | -> | 106A | 0.51564  | 29%  |
|    | 97A  | -> | 108A | 0.14537  | 2%   |
|    | 99A  | -> | 108A | -0.12111 | 2%   |
|    | 99A  | -> | 109A | 0.17844  | 3%   |
|    | 101A | -> | 107A | -0.14545 | 2%   |
|    | 92B  | -> | 104B | -0.45231 | 22%  |
|    | 94B  | -> | 104B | 0.40444  | 18%  |
|    | 97B  | -> | 108B | -0.12868 | 2%   |
|    | 98B  | -> | 109B | -0.17717 | 3%   |
| 56 | 100A | -> | 107A | -0.38209 | 15%  |
|    | 95B  | -> | 104B | 0.33299  | 11%  |
|    | 96B  | -> | 104B | 0.84628  | 73%  |
|    | 96B  | -> | 107B | 0.10295  | 1%   |
| 57 | 100A | -> | 107A | 0.90623  | 85%  |

|    |      |    |      |          |     |
|----|------|----|------|----------|-----|
|    | 95B  | -> | 104B | 0.18949  | 4%  |
|    | 96B  | -> | 104B | 0.33777  | 12% |
| 58 | 97B  | -> | 105B | -0.10841 | 1%  |
|    | 98B  | -> | 105B | 0.98891  | 99% |
| 59 | 90B  | -> | 106B | 0.16002  | 3%  |
|    | 94B  | -> | 104B | -0.23620 | 6%  |
|    | 95B  | -> | 105B | 0.66139  | 47% |
|    | 96B  | -> | 105B | -0.62085 | 41% |
|    | 100B | -> | 106B | -0.16426 | 3%  |
| 60 | 96A  | -> | 108A | 0.11056  | 1%  |
|    | 97A  | -> | 106A | 0.24646  | 6%  |
|    | 97A  | -> | 107A | 0.14376  | 2%  |
|    | 99A  | -> | 107A | -0.14468 | 2%  |
|    | 101A | -> | 108A | 0.48982  | 25% |
|    | 93B  | -> | 107B | 0.14853  | 2%  |
|    | 94B  | -> | 108B | 0.11508  | 1%  |
|    | 97B  | -> | 104B | 0.50641  | 26% |
|    | 97B  | -> | 107B | -0.21974 | 5%  |
|    | 98B  | -> | 107B | -0.34881 | 13% |
|    | 99B  | -> | 108B | 0.39156  | 16% |
| 61 | 97B  | -> | 106B | -0.10812 | 1%  |
|    | 98B  | -> | 106B | 0.98631  | 99% |
| 62 | 97A  | -> | 106A | -0.51608 | 27% |
|    | 97A  | -> | 107A | 0.11167  | 1%  |
|    | 99A  | -> | 106A | -0.17401 | 3%  |
|    | 99A  | -> | 107A | 0.30225  | 9%  |
|    | 101A | -> | 108A | 0.54134  | 30% |
|    | 93B  | -> | 104B | -0.23793 | 6%  |
|    | 97B  | -> | 104B | -0.31031 | 10% |
|    | 97B  | -> | 107B | -0.19353 | 4%  |
|    | 98B  | -> | 104B | -0.21187 | 5%  |
|    | 98B  | -> | 107B | 0.14536  | 2%  |
|    | 99B  | -> | 108B | 0.15366  | 2%  |
| 63 | 95B  | -> | 104B | 0.89648  | 85% |
|    | 96B  | -> | 104B | -0.37365 | 15% |
| 64 | 101A | -> | 108A | -0.15578 | 3%  |
|    | 97B  | -> | 107B | -0.12324 | 2%  |
|    | 98B  | -> | 107B | -0.11288 | 1%  |
|    | 103B | -> | 109B | 0.94895  | 95% |
| 65 | 98A  | -> | 106A | -0.13301 | 2%  |
|    | 98A  | -> | 107A | 0.37823  | 15% |
|    | 100A | -> | 108A | 0.89437  | 83% |
| 66 | 96A  | -> | 108A | -0.22272 | 5%  |
|    | 97A  | -> | 106A | 0.15680  | 3%  |
|    | 97A  | -> | 107A | -0.42578 | 19% |

|    |      |    |      |          |     |
|----|------|----|------|----------|-----|
|    | 99A  | -> | 107A | -0.19860 | 4%  |
|    | 101A | -> | 108A | 0.57140  | 34% |
|    | 91B  | -> | 108B | 0.11150  | 1%  |
|    | 93B  | -> | 107B | -0.18700 | 4%  |
|    | 94B  | -> | 108B | -0.17208 | 3%  |
|    | 97B  | -> | 107B | 0.43618  | 20% |
|    | 99B  | -> | 108B | -0.17281 | 3%  |
|    | 103B | -> | 109B | 0.21495  | 5%  |
| 67 | 95A  | -> | 106A | 0.16445  | 3%  |
|    | 96A  | -> | 107A | -0.28395 | 9%  |
|    | 97A  | -> | 108A | -0.26796 | 8%  |
|    | 99A  | -> | 109A | -0.10082 | 1%  |
|    | 101A | -> | 107A | 0.13179  | 2%  |
|    | 91B  | -> | 104B | -0.13951 | 2%  |
|    | 91B  | -> | 107B | 0.22994  | 6%  |
|    | 93B  | -> | 108B | -0.16513 | 3%  |
|    | 94B  | -> | 104B | 0.51363  | 29% |
|    | 94B  | -> | 107B | -0.33275 | 12% |
|    | 97B  | -> | 108B | 0.33041  | 12% |
|    | 98B  | -> | 108B | 0.34232  | 13% |
|    | 99B  | -> | 107B | -0.11695 | 1%  |
| 68 | 97A  | -> | 106A | 0.10965  | 1%  |
|    | 99A  | -> | 106A | -0.17154 | 3%  |
|    | 99A  | -> | 107A | 0.47871  | 24% |
|    | 93B  | -> | 104B | 0.52719  | 29% |
|    | 97B  | -> | 104B | 0.30721  | 10% |
|    | 97B  | -> | 107B | 0.12818  | 2%  |
|    | 98B  | -> | 104B | -0.14325 | 2%  |
|    | 98B  | -> | 107B | 0.49337  | 25% |
|    | 103B | -> | 109B | 0.21202  | 5%  |
| 69 | 96A  | -> | 106A | -0.12499 | 2%  |
|    | 99A  | -> | 108A | 0.10382  | 1%  |
|    | 94B  | -> | 104B | 0.12601  | 2%  |
|    | 102B | -> | 109B | 0.96891  | 96% |
| 70 | 95A  | -> | 107A | -0.10470 | 1%  |
|    | 96A  | -> | 106A | 0.52193  | 29% |
|    | 96A  | -> | 107A | -0.29662 | 9%  |
|    | 97A  | -> | 108A | -0.22210 | 5%  |
|    | 99A  | -> | 108A | -0.47902 | 25% |
|    | 101A | -> | 107A | 0.12635  | 2%  |
|    | 92B  | -> | 104B | 0.11811  | 2%  |
|    | 94B  | -> | 104B | -0.25917 | 7%  |
|    | 98B  | -> | 108B | -0.37085 | 15% |
|    | 102B | -> | 109B | 0.21007  | 5%  |
| 71 | 98A  | -> | 107A | 0.82001  | 70% |

|    |      |    |      |          |      |
|----|------|----|------|----------|------|
|    | 100A | -> | 108A | -0.41252 | 18%  |
|    | 104A | -> | 109A | -0.34819 | 13%  |
| 72 | 98A  | -> | 107A | 0.32146  | 11%  |
|    | 100A | -> | 108A | -0.10086 | 1%   |
|    | 104A | -> | 109A | 0.92803  | 88%  |
| 73 | 105A | -> | 109A | 0.99720  | 100% |
| 74 | 92A  | -> | 106A | -0.12485 | 2%   |
|    | 94A  | -> | 106A | -0.16272 | 3%   |
|    | 98A  | -> | 108A | 0.85518  | 83%  |
|    | 102A | -> | 108A | -0.13320 | 2%   |
|    | 89B  | -> | 104B | 0.10377  | 1%   |
|    | 90B  | -> | 108B | -0.13091 | 2%   |
|    | 95B  | -> | 104B | -0.13024 | 2%   |
|    | 96B  | -> | 107B | -0.11708 | 2%   |
|    | 103B | -> | 110B | 0.18024  | 4%   |
| 75 | 103A | -> | 109A | 0.99274  | 100% |
| 76 | 98A  | -> | 108A | -0.15919 | 3%   |
|    | 103B | -> | 110B | 0.97846  | 97%  |
| 77 | 95B  | -> | 107B | 0.31896  | 10%  |
|    | 96B  | -> | 104B | -0.10157 | 1%   |
|    | 96B  | -> | 107B | 0.93308  | 89%  |
| 78 | 98A  | -> | 107A | 0.16660  | 3%   |
|    | 84B  | -> | 104B | -0.11284 | 1%   |
|    | 87B  | -> | 104B | -0.13436 | 2%   |
|    | 89B  | -> | 108B | -0.10031 | 1%   |
|    | 90B  | -> | 104B | 0.93023  | 90%  |
|    | 90B  | -> | 107B | 0.10506  | 1%   |
|    | 95B  | -> | 108B | -0.11340 | 1%   |
| 79 | 96A  | -> | 106A | -0.10198 | 1%   |
|    | 99A  | -> | 108A | -0.23069 | 6%   |
|    | 90B  | -> | 106B | 0.18048  | 4%   |
|    | 91B  | -> | 104B | 0.56163  | 34%  |
|    | 92B  | -> | 104B | 0.45702  | 22%  |
|    | 94B  | -> | 104B | 0.46738  | 24%  |
|    | 94B  | -> | 107B | 0.17420  | 3%   |
|    | 98B  | -> | 108B | -0.24420 | 6%   |
| 80 | 102B | -> | 110B | 0.99498  | 100% |
| 81 | 98A  | -> | 108A | 0.12268  | 2%   |
|    | 98A  | -> | 109A | 0.11354  | 1%   |
|    | 102A | -> | 109A | 0.97716  | 97%  |
| 82 | 93A  | -> | 106A | -0.24225 | 6%   |
|    | 95A  | -> | 108A | 0.13281  | 2%   |
|    | 97A  | -> | 106A | -0.46287 | 23%  |
|    | 99A  | -> | 107A | -0.28694 | 9%   |
|    | 90B  | -> | 105B | -0.20446 | 5%   |

|    |      |    |      |          |      |
|----|------|----|------|----------|------|
|    | 93B  | -> | 104B | 0.60339  | 39%  |
|    | 97B  | -> | 104B | -0.13555 | 2%   |
|    | 97B  | -> | 107B | 0.22507  | 5%   |
|    | 98B  | -> | 107B | -0.27945 | 8%   |
| 83 | 96A  | -> | 108A | 0.10601  | 1%   |
|    | 97A  | -> | 107A | 0.40573  | 17%  |
|    | 93B  | -> | 104B | -0.30544 | 10%  |
|    | 93B  | -> | 107B | 0.34630  | 13%  |
|    | 94B  | -> | 108B | 0.18156  | 3%   |
|    | 97B  | -> | 107B | 0.72248  | 55%  |
| 84 | 105A | -> | 110A | 0.97272  | 96%  |
|    | 105A | -> | 113A | 0.10374  | 1%   |
|    | 95B  | -> | 107B | -0.17953 | 3%   |
| 85 | 104A | -> | 110A | 0.99088  | 100% |
| 86 | 98A  | -> | 108A | -0.16993 | 3%   |
|    | 105A | -> | 110A | 0.19487  | 4%   |
|    | 90B  | -> | 108B | -0.11184 | 1%   |
|    | 95B  | -> | 107B | 0.89827  | 83%  |
|    | 96B  | -> | 107B | -0.29804 | 9%   |
| 87 | 93B  | -> | 105B | 0.80981  | 68%  |
|    | 94B  | -> | 106B | 0.11258  | 1%   |
|    | 97B  | -> | 105B | -0.54247 | 31%  |
| 88 | 95A  | -> | 106A | 0.51710  | 28%  |
|    | 95A  | -> | 107A | 0.34404  | 13%  |
|    | 96A  | -> | 106A | -0.22653 | 5%   |
|    | 97A  | -> | 108A | 0.19672  | 4%   |
|    | 99A  | -> | 108A | -0.40873 | 18%  |
|    | 99A  | -> | 109A | 0.24266  | 6%   |
|    | 92B  | -> | 104B | -0.36945 | 15%  |
|    | 94B  | -> | 104B | 0.12547  | 2%   |
|    | 97B  | -> | 108B | 0.25467  | 7%   |
|    | 98B  | -> | 108B | -0.14077 | 2%   |
| 89 | 94A  | -> | 106A | 0.95471  | 95%  |
|    | 98A  | -> | 108A | 0.20851  | 5%   |
| 90 | 103A | -> | 110A | 0.99224  | 99%  |
|    | 103A | -> | 113A | 0.10665  | 1%   |
| 91 | 98A  | -> | 108A | 0.10899  | 1%   |
|    | 92B  | -> | 105B | -0.15590 | 3%   |
|    | 93B  | -> | 106B | 0.78786  | 65%  |
|    | 94B  | -> | 105B | 0.17354  | 3%   |
|    | 97B  | -> | 106B | -0.52010 | 28%  |
| 92 | 96B  | -> | 108B | -0.10695 | 1%   |
|    | 101B | -> | 109B | 0.99253  | 99%  |
| 93 | 95A  | -> | 106A | 0.11220  | 1%   |
|    | 95A  | -> | 107A | 0.25980  | 7%   |

|     |      |    |      |          |      |
|-----|------|----|------|----------|------|
|     | 96A  | -> | 106A | 0.27074  | 8%   |
|     | 99A  | -> | 109A | 0.20634  | 5%   |
|     | 91B  | -> | 107B | -0.27333 | 8%   |
|     | 92B  | -> | 104B | 0.42714  | 20%  |
|     | 92B  | -> | 107B | 0.39851  | 17%  |
|     | 93B  | -> | 108B | 0.13800  | 2%   |
|     | 94B  | -> | 104B | -0.10651 | 1%   |
|     | 98B  | -> | 108B | 0.42801  | 20%  |
|     | 98B  | -> | 109B | -0.32846 | 12%  |
| 94  | 95B  | -> | 108B | 0.34212  | 12%  |
|     | 96B  | -> | 108B | 0.92898  | 87%  |
|     | 101B | -> | 109B | 0.11088  | 1%   |
| 95  | 100B | -> | 109B | 0.99772  | 100% |
| 96  | 93A  | -> | 106A | -0.18669 | 4%   |
|     | 95A  | -> | 108A | 0.10005  | 1%   |
|     | 101A | -> | 109A | -0.10491 | 1%   |
|     | 90B  | -> | 105B | 0.32946  | 11%  |
|     | 99B  | -> | 109B | 0.88463  | 83%  |
| 97  | 93A  | -> | 106A | -0.24285 | 6%   |
|     | 84B  | -> | 105B | -0.20644 | 4%   |
|     | 87B  | -> | 105B | -0.16814 | 3%   |
|     | 90B  | -> | 105B | 0.81512  | 70%  |
|     | 99B  | -> | 109B | -0.39174 | 16%  |
| 98  | 95A  | -> | 107A | -0.14050 | 2%   |
|     | 96A  | -> | 106A | 0.10948  | 1%   |
|     | 96A  | -> | 107A | 0.13572  | 2%   |
|     | 99A  | -> | 108A | 0.12368  | 2%   |
|     | 90B  | -> | 106B | -0.11729 | 1%   |
|     | 93B  | -> | 108B | 0.15974  | 3%   |
|     | 94B  | -> | 107B | 0.55388  | 32%  |
|     | 97B  | -> | 108B | 0.73973  | 57%  |
| 99  | 95A  | -> | 106A | 0.39898  | 17%  |
|     | 95A  | -> | 107A | -0.18418 | 4%   |
|     | 96A  | -> | 106A | 0.33026  | 12%  |
|     | 96A  | -> | 107A | 0.33686  | 12%  |
|     | 99A  | -> | 108A | 0.19079  | 4%   |
|     | 91B  | -> | 104B | 0.59186  | 37%  |
|     | 92B  | -> | 104B | -0.17775 | 3%   |
|     | 94B  | -> | 104B | -0.17249 | 3%   |
|     | 94B  | -> | 107B | -0.25349 | 7%   |
|     | 98B  | -> | 108B | 0.10715  | 1%   |
| 100 | 91B  | -> | 105B | 0.33334  | 11%  |
|     | 92B  | -> | 105B | 0.64471  | 43%  |
|     | 93B  | -> | 106B | 0.22421  | 5%   |
|     | 94B  | -> | 105B | -0.61057 | 38%  |



97B

->

106B

-0.1409

2%

---
